# Supplementary material for: Acoustic monitors and direct observations provide similar but distinct perspectives on bird assemblages in a lowland forest of eastern Ecuador
Source: PeerJ. 2021 Jan 13;9:e10565. doi: 10.7717/peerj.10565 (PMC7811295; doi:10.7717/peerj.10565)
Supplement: Supplemental Information 2 — Species identified from acoustic monitor recordings are listed by plot, year, point, date, and time. Species are identified by first three letters of genus and species names; see Table S1 for full names. [file peerj-09-10565-s002.xlsx]

## Sheet: Codes
Separate sheets list species identified from recordings on each of two plots.
H2013, for example, contains data from the Harpia plot in 2013; Puma plot is indicated with P
Sheets give plot, location (point), date, time, and species code.
Species codes are first three letters of genus and first three of species; see Supplementary Table S1.
Unk - unidentified species.
None - no vocalizations detected; this occurred on few dates and only durin the first period (0545-0555 h).

## Sheet: H2013
Plot	Year	Point	Date	Time	Species
Harpia	13	1, 400	2013-02-14	545	Denruf
Harpia	13	1, 400	2013-02-14	545	Nycoce
Harpia	13	1, 400	2013-02-14	545	Xipgut
Harpia	13	1, 400	2013-02-14	600	Autruf
Harpia	13	1, 400	2013-02-14	600	Celgra
Harpia	13	1, 400	2013-02-14	600	Cercin
Harpia	13	1, 400	2013-02-14	600	Cryund
Harpia	13	1, 400	2013-02-14	600	Elepla
Harpia	13	1, 400	2013-02-14	600	Glyspi
Harpia	13	1, 400	2013-02-14	600	Liotho
Harpia	13	1, 400	2013-02-14	600	Xipgut
Harpia	13	1, 400	2013-02-14	615	Autruf
Harpia	13	1, 400	2013-02-14	615	Cercin
Harpia	13	1, 400	2013-02-14	615	Colplu
Harpia	13	1, 400	2013-02-14	615	Glyspi
Harpia	13	1, 400	2013-02-14	615	Lopvit
Harpia	13	1, 400	2013-02-14	615	Hylpoe
Harpia	13	1, 400	2013-02-14	615	Myrmyo
Harpia	13	1, 400	2013-02-14	615	Piomen
Harpia	13	1, 400	2013-02-14	615	Pipcor
Harpia	13	1, 400	2013-02-14	615	Ramtuc
Harpia	13	1, 400	2013-02-14	615	Ramvit
Harpia	13	1, 400	2013-02-14	615	Thasch
Harpia	13	1, 400	2013-02-14	615	Thrcor
Harpia	13	1, 400	2013-02-14	615	Unk
Harpia	13	1, 400	2013-02-14	615	Xipgut
Harpia	13	1, 400	2013-02-14	630	Amafar
Harpia	13	1, 400	2013-02-14	630	Atispa
Harpia	13	1, 400	2013-02-14	630	Capnig
Harpia	13	1, 400	2013-02-14	630	Cercin
Harpia	13	1, 400	2013-02-14	630	Colplu
Harpia	13	1, 400	2013-02-14	630	Liotho
Harpia	13	1, 400	2013-02-14	630	Lopvit
Harpia	13	1, 400	2013-02-14	630	Myrmyo
Harpia	13	1, 400	2013-02-14	630	Pipcor
Harpia	13	1, 400	2013-02-14	630	Ramtuc
Harpia	13	1, 400	2013-02-14	630	Thrcor
Harpia	13	1, 400	2013-02-14	630	Xipgut
Harpia	13	1, 400	2013-02-14	630	Xipgut
Harpia	13	1, 400	2013-02-14	645	Brocya
Harpia	13	1, 400	2013-02-14	645	Capnig
Harpia	13	1, 400	2013-02-14	645	Myrmyo
Harpia	13	1, 400	2013-02-14	645	Pipcor
Harpia	13	1, 400	2013-02-14	645	Ramtuc
Harpia	13	1, 400	2013-02-14	645	Ramvit
Harpia	13	1, 400	2013-02-14	645	Thrcor
Harpia	13	1, 400	2013-02-14	645	Xipgut
Harpia	13	1, 400	2013-02-14	700	Capnig
Harpia	13	1, 400	2013-02-14	700	Cercin
Harpia	13	1, 400	2013-02-14	700	Colplu
Harpia	13	1, 400	2013-02-14	700	Geomon
Harpia	13	1, 400	2013-02-14	700	Liotho
Harpia	13	1, 400	2013-02-14	700	Myrmyo
Harpia	13	1, 400	2013-02-14	700	Pipcor
Harpia	13	1, 400	2013-02-14	700	Pitgro
Harpia	13	1, 400	2013-02-14	700	Thrcor
Harpia	13	1, 400	2013-02-14	700	Tromel
Harpia	13	1, 400	2013-02-14	700	Unk
Harpia	13	1, 400	2013-02-14	715	Amafar
Harpia	13	1, 400	2013-02-14	715	Autruf
Harpia	13	1, 400	2013-02-14	715	Cercin
Harpia	13	1, 400	2013-02-14	715	Colplu
Harpia	13	1, 400	2013-02-14	715	Geomon
Harpia	13	1, 400	2013-02-14	715	Liotho
Harpia	13	1, 400	2013-02-14	715	Myrfor
Harpia	13	1, 400	2013-02-14	715	Myrmyo
Harpia	13	1, 400	2013-02-14	715	Phaful
Harpia	13	1, 400	2013-02-14	715	Piomel
Harpia	13	1, 400	2013-02-14	715	Pipcor
Harpia	13	1, 400	2013-02-14	715	Psavir
Harpia	13	1, 400	2013-02-14	715	Rhysim
Harpia	13	1, 400	2013-02-14	715	Thrcor
Harpia	13	1, 400	2013-02-14	715	Unk
Harpia	13	1, 400	2013-02-14	730	Brocya
Harpia	13	1, 400	2013-02-14	730	Capnig
Harpia	13	1, 400	2013-02-14	730	Cercin
Harpia	13	1, 400	2013-02-14	730	Colplu
Harpia	13	1, 400	2013-02-14	730	Geomon
Harpia	13	1, 400	2013-02-14	730	Glyspi
Harpia	13	1, 400	2013-02-14	730	Liotho
Harpia	13	1, 400	2013-02-14	730	Micmar
Harpia	13	1, 400	2013-02-14	730	Myrmyo
Harpia	13	1, 400	2013-02-14	730	Phaful
Harpia	13	1, 400	2013-02-14	730	Pipcor
Harpia	13	1, 400	2013-02-14	730	Rammel
Harpia	13	1, 400	2013-02-14	730	Thrcor
Harpia	13	1, 400	2013-02-14	730	Unk
Harpia	13	1, 400	2013-02-14	745	Autruf
Harpia	13	1, 400	2013-02-14	745	Brocya
Harpia	13	1, 400	2013-02-14	745	Capnig
Harpia	13	1, 400	2013-02-14	745	Cercin
Harpia	13	1, 400	2013-02-14	745	Colplu
Harpia	13	1, 400	2013-02-14	745	Geomon
Harpia	13	1, 400	2013-02-14	745	Liotho
Harpia	13	1, 400	2013-02-14	745	Myrmyo
Harpia	13	1, 400	2013-02-14	745	Pipcor
Harpia	13	1, 400	2013-02-14	745	Rammel
Harpia	13	1, 400	2013-02-14	745	Ramtuc
Harpia	13	1, 400	2013-02-14	745	Thrcor
Harpia	13	1, 400	2013-02-14	745	Tolass
Harpia	13	1, 400	2013-02-14	745	Tromel
Harpia	13	1, 400	2013-02-14	800	Colplu
Harpia	13	1, 400	2013-02-14	800	Liotho
Harpia	13	1, 400	2013-02-14	800	Myrmyo
Harpia	13	1, 400	2013-02-14	800	Pipcor
Harpia	13	1, 400	2013-02-14	800	Ramtuc
Harpia	13	1, 400	2013-02-14	800	Ramvit
Harpia	13	1, 400	2013-02-14	800	Thrcor
Harpia	13	1, -50	2013-02-25	545	Denruf
Harpia	13	1, -50	2013-02-25	545	Nycoce
Harpia	13	1, -50	2013-02-25	545	Otuwat
Harpia	13	1, -50	2013-02-25	600	Autinf
Harpia	13	1, -50	2013-02-25	600	Barmar
Harpia	13	1, -50	2013-02-25	600	Buccap
Harpia	13	1, -50	2013-02-25	600	Camtur
Harpia	13	1, -50	2013-02-25	600	Cercin
Harpia	13	1, -50	2013-02-25	600	Chipar
Harpia	13	1, -50	2013-02-25	600	Dapame
Harpia	13	1, -50	2013-02-25	600	Denruf
Harpia	13	1, -50	2013-02-25	600	Hylsub
Harpia	13	1, -50	2013-02-25	600	Liotho
Harpia	13	1, -50	2013-02-25	600	Micgil
Harpia	13	1, -50	2013-02-25	600	Myraxi
Harpia	13	1, -50	2013-02-25	600	Nycoce
Harpia	13	1, -50	2013-02-25	600	Ramtuc
Harpia	13	1, -50	2013-02-25	600	Thamur
Harpia	13	1, -50	2013-02-25	600	Xipgut
Harpia	13	1, -50	2013-02-25	615	Atispa
Harpia	13	1, -50	2013-02-25	615	Autinf
Harpia	13	1, -50	2013-02-25	615	Cercin
Harpia	13	1, -50	2013-02-25	615	Denruf
Harpia	13	1, -50	2013-02-25	615	Hylpoe
Harpia	13	1, -50	2013-02-25	615	Hylsub
Harpia	13	1, -50	2013-02-25	615	Hypcan
Harpia	13	1, -50	2013-02-25	615	Liotho
Harpia	13	1, -50	2013-02-25	615	Myrcam
Harpia	13	1, -50	2013-02-25	615	Myrfor
Harpia	13	1, -50	2013-02-25	615	Phonig
Harpia	13	1, -50	2013-02-25	615	Piomel
Harpia	13	1, -50	2013-02-25	615	Pygste
Harpia	13	1, -50	2013-02-25	615	Ramtuc
Harpia	13	1, -50	2013-02-25	615	Thamur
Harpia	13	1, -50	2013-02-25	615	Unk
Harpia	13	1, -50	2013-02-25	615	Xipgut
Harpia	13	1, -50	2013-02-25	630	Atispa
Harpia	13	1, -50	2013-02-25	630	Brocya
Harpia	13	1, -50	2013-02-25	630	Cercin
Harpia	13	1, -50	2013-02-25	630	Colplu
Harpia	13	1, -50	2013-02-25	630	Hylpoe
Harpia	13	1, -50	2013-02-25	630	Liotho
Harpia	13	1, -50	2013-02-25	630	Myrfor
Harpia	13	1, -50	2013-02-25	630	Pygste
Harpia	13	1, -50	2013-02-25	630	Quepur
Harpia	13	1, -50	2013-02-25	630	Ramtuc
Harpia	13	1, -50	2013-02-25	630	Ramvit
Harpia	13	1, -50	2013-02-25	630	Unk
Harpia	13	1, -50	2013-02-25	645	Amafar
Harpia	13	1, -50	2013-02-25	645	Atispa
Harpia	13	1, -50	2013-02-25	645	Cammel
Harpia	13	1, -50	2013-02-25	645	Capnig
Harpia	13	1, -50	2013-02-25	645	Cercin
Harpia	13	1, -50	2013-02-25	645	Colplu
Harpia	13	1, -50	2013-02-25	645	Cymlin
Harpia	13	1, -50	2013-02-25	645	Hylhyp
Harpia	13	1, -50	2013-02-25	645	Hylpoe
Harpia	13	1, -50	2013-02-25	645	Liotho
Harpia	13	1, -50	2013-02-25	645	Pitgro
Harpia	13	1, -50	2013-02-25	645	Psavir
Harpia	13	1, -50	2013-02-25	645	Pteplu
Harpia	13	1, -50	2013-02-25	645	Thrcor
Harpia	13	1, -50	2013-02-25	645	Tinmaj
Harpia	13	1, -50	2013-02-25	645	Unk
Harpia	13	1, -50	2013-02-25	700	Amafar
Harpia	13	1, -50	2013-02-25	700	Brocya
Harpia	13	1, -50	2013-02-25	700	Cammel
Harpia	13	1, -50	2013-02-25	700	Capnig
Harpia	13	1, -50	2013-02-25	700	Cercin
Harpia	13	1, -50	2013-02-25	700	Colplu
Harpia	13	1, -50	2013-02-25	700	Cymlin
Harpia	13	1, -50	2013-02-25	700	Gymleu
Harpia	13	1, -50	2013-02-25	700	Hylhyp
Harpia	13	1, -50	2013-02-25	700	Hylpoe
Harpia	13	1, -50	2013-02-25	700	Liotho
Harpia	13	1, -50	2013-02-25	700	Micmar
Harpia	13	1, -50	2013-02-25	700	Myitub
Harpia	13	1, -50	2013-02-25	700	Myrfor
Harpia	13	1, -50	2013-02-25	700	Pitgro
Harpia	13	1, -50	2013-02-25	700	Rhysim
Harpia	13	1, -50	2013-02-25	700	Tolass
Harpia	13	1, -50	2013-02-25	700	Tromel
Harpia	13	1, -50	2013-02-25	700	Trovir
Harpia	13	1, -50	2013-02-25	700	Unk
Harpia	13	1, -50	2013-02-25	700	Xipgut
Harpia	13	1, -50	2013-02-25	715	Amafar
Harpia	13	1, -50	2013-02-25	715	Brocya
Harpia	13	1, -50	2013-02-25	715	Cammel
Harpia	13	1, -50	2013-02-25	715	Capnig
Harpia	13	1, -50	2013-02-25	715	Cercin
Harpia	13	1, -50	2013-02-25	715	Colplu
Harpia	13	1, -50	2013-02-25	715	Cymlin
Harpia	13	1, -50	2013-02-25	715	Gymleu
Harpia	13	1, -50	2013-02-25	715	Hylhyp
Harpia	13	1, -50	2013-02-25	715	Liotho
Harpia	13	1, -50	2013-02-25	715	Myitub
Harpia	13	1, -50	2013-02-25	715	Ramtuc
Harpia	13	1, -50	2013-02-25	715	Tromel
Harpia	13	1, -50	2013-02-25	730	Amafar
Harpia	13	1, -50	2013-02-25	730	Brocya
Harpia	13	1, -50	2013-02-25	730	Capnig
Harpia	13	1, -50	2013-02-25	730	Cercin
Harpia	13	1, -50	2013-02-25	730	Colplu
Harpia	13	1, -50	2013-02-25	730	Cymlin
Harpia	13	1, -50	2013-02-25	730	Eupxan
Harpia	13	1, -50	2013-02-25	730	Forcol
Harpia	13	1, -50	2013-02-25	730	Gymleu
Harpia	13	1, -50	2013-02-25	730	Hylhyp
Harpia	13	1, -50	2013-02-25	730	Liotho
Harpia	13	1, -50	2013-02-25	730	Myrcam
Harpia	13	1, -50	2013-02-25	730	Myrfor
Harpia	13	1, -50	2013-02-25	730	Piomel
Harpia	13	1, -50	2013-02-25	730	Pitgro
Harpia	13	1, -50	2013-02-25	730	Ramtuc
Harpia	13	1, -50	2013-02-25	730	Thacae
Harpia	13	1, -50	2013-02-25	730	Tromel
Harpia	13	1, -50	2013-02-25	730	Trovir
Harpia	13	1, -50	2013-02-25	745	Aramac
Harpia	13	1, -50	2013-02-25	745	Brocya
Harpia	13	1, -50	2013-02-25	745	Capnig
Harpia	13	1, -50	2013-02-25	745	Cercin
Harpia	13	1, -50	2013-02-25	745	Colplu
Harpia	13	1, -50	2013-02-25	745	Colsub
Harpia	13	1, -50	2013-02-25	745	Cyacya
Harpia	13	1, -50	2013-02-25	745	Cymlin
Harpia	13	1, -50	2013-02-25	745	Hylhyp
Harpia	13	1, -50	2013-02-25	745	Hylpoe
Harpia	13	1, -50	2013-02-25	745	Myrcam
Harpia	13	1, -50	2013-02-25	745	Pitgro
Harpia	13	1, -50	2013-02-25	745	Pteplu
Harpia	13	1, -50	2013-02-25	745	Tolass
Harpia	13	1, -50	2013-02-25	745	Tromel
Harpia	13	1, -50	2013-02-25	745	Unk
Harpia	13	1, -50	2013-02-25	745	Xipgut
Harpia	13	1, -50	2013-02-25	800	Amafar
Harpia	13	1, -50	2013-02-25	800	Ancstr
Harpia	13	1, -50	2013-02-25	800	Aramac
Harpia	13	1, -50	2013-02-25	800	Brocya
Harpia	13	1, -50	2013-02-25	800	Capnig
Harpia	13	1, -50	2013-02-25	800	Cercin
Harpia	13	1, -50	2013-02-25	800	Colplu
Harpia	13	1, -50	2013-02-25	800	Freund
Harpia	13	1, -50	2013-02-25	800	Hylhyp
Harpia	13	1, -50	2013-02-25	800	Legleu
Harpia	13	1, -50	2013-02-25	800	Monmor
Harpia	13	1, -50	2013-02-25	800	Psavir
Harpia	13	1, -50	2013-02-25	800	Psavir
Harpia	13	1, -50	2013-02-25	800	Ramtuc
Harpia	13	1, -50	2013-02-25	800	Rhysim
Harpia	13	1, -50	2013-02-25	800	Tolass
Harpia	13	1, -50	2013-02-25	800	Tromel
Harpia	13	1, -50	2013-02-25	800	Trovir
Harpia	13	1, -50	2013-02-25	800	Unk
Harpia	13	1, 800	2013-02-13	545	Barmar
Harpia	13	1, 800	2013-02-13	545	Nonbru
Harpia	13	1, 800	2013-02-13	545	Otuwat
Harpia	13	1, 800	2013-02-13	545	Tinmaj
Harpia	13	1, 800	2013-02-13	600	Cercin
Harpia	13	1, 800	2013-02-13	600	Hylpoe
Harpia	13	1, 800	2013-02-13	600	Liotho
Harpia	13	1, 800	2013-02-13	600	Myrmyo
Harpia	13	1, 800	2013-02-13	600	Nonbru
Harpia	13	1, 800	2013-02-13	600	Thaard
Harpia	13	1, 800	2013-02-13	600	Thacae
Harpia	13	1, 800	2013-02-13	600	Thamur
Harpia	13	1, 800	2013-02-13	600	Tinmaj
Harpia	13	1, 800	2013-02-13	600	Tolass
Harpia	13	1, 800	2013-02-13	600	Xipgut
Harpia	13	1, 800	2013-02-13	615	Atispa
Harpia	13	1, 800	2013-02-13	615	Camtur
Harpia	13	1, 800	2013-02-13	615	Chipar
Harpia	13	1, 800	2013-02-13	615	Colplu
Harpia	13	1, 800	2013-02-13	615	Hylhyp
Harpia	13	1, 800	2013-02-13	615	Liotho
Harpia	13	1, 800	2013-02-13	615	Myrmen
Harpia	13	1, 800	2013-02-13	615	Myrmyo
Harpia	13	1, 800	2013-02-13	615	Nonbru
Harpia	13	1, 800	2013-02-13	615	Pitgro
Harpia	13	1, 800	2013-02-13	615	Psavir
Harpia	13	1, 800	2013-02-13	615	Pygste
Harpia	13	1, 800	2013-02-13	615	Thaard
Harpia	13	1, 800	2013-02-13	615	Thamur
Harpia	13	1, 800	2013-02-13	615	Tolass
Harpia	13	1, 800	2013-02-13	615	Xipgut
Harpia	13	1, 800	2013-02-13	630	Atispa
Harpia	13	1, 800	2013-02-13	630	Camtur
Harpia	13	1, 800	2013-02-13	630	Celgra
Harpia	13	1, 800	2013-02-13	630	Cercin
Harpia	13	1, 800	2013-02-13	630	Chipar
Harpia	13	1, 800	2013-02-13	630	Colplu
Harpia	13	1, 800	2013-02-13	630	Hylnae
Harpia	13	1, 800	2013-02-13	630	Hypcan
Harpia	13	1, 800	2013-02-13	630	Myrmyo
Harpia	13	1, 800	2013-02-13	630	Thaard
Harpia	13	1, 800	2013-02-13	630	Thamur
Harpia	13	1, 800	2013-02-13	630	Thrcor
Harpia	13	1, 800	2013-02-13	630	Unk
Harpia	13	1, 800	2013-02-13	645	Aramac
Harpia	13	1, 800	2013-02-13	645	Atispa
Harpia	13	1, 800	2013-02-13	645	Cercin
Harpia	13	1, 800	2013-02-13	645	Chipar
Harpia	13	1, 800	2013-02-13	645	Colplu
Harpia	13	1, 800	2013-02-13	645	Hypcan
Harpia	13	1, 800	2013-02-13	645	Myrbra
Harpia	13	1, 800	2013-02-13	645	Piomen
Harpia	13	1, 800	2013-02-13	645	Pitgro
Harpia	13	1, 800	2013-02-13	645	Pteplu
Harpia	13	1, 800	2013-02-13	645	Thaard
Harpia	13	1, 800	2013-02-13	645	Thamur
Harpia	13	1, 800	2013-02-13	645	Thrcor
Harpia	13	1, 800	2013-02-13	645	Tolass
Harpia	13	1, 800	2013-02-13	645	Unk
Harpia	13	1, 800	2013-02-13	645	Unk
Harpia	13	1, 800	2013-02-13	700	Camrub
Harpia	13	1, 800	2013-02-13	700	Camtur
Harpia	13	1, 800	2013-02-13	700	Cercin
Harpia	13	1, 800	2013-02-13	700	Colplu
Harpia	13	1, 800	2013-02-13	700	Pitgro
Harpia	13	1, 800	2013-02-13	700	Pteplu
Harpia	13	1, 800	2013-02-13	700	Thamur
Harpia	13	1, 800	2013-02-13	700	Thrcor
Harpia	13	1, 800	2013-02-13	700	Xipgut
Harpia	13	1, 800	2013-02-13	715	Cercin
Harpia	13	1, 800	2013-02-13	715	Colplu
Harpia	13	1, 800	2013-02-13	715	Geomon
Harpia	13	1, 800	2013-02-13	715	Hypcan
Harpia	13	1, 800	2013-02-13	715	Myrmyo
Harpia	13	1, 800	2013-02-13	715	Pitgro
Harpia	13	1, 800	2013-02-13	715	Thaard
Harpia	13	1, 800	2013-02-13	715	Thamur
Harpia	13	1, 800	2013-02-13	715	Thasch
Harpia	13	1, 800	2013-02-13	715	Thrcor
Harpia	13	1, 800	2013-02-13	715	Tolass
Harpia	13	1, 800	2013-02-13	715	Xipgut
Harpia	13	1, 800	2013-02-13	715	Xipobs
Harpia	13	1, 800	2013-02-13	730	Brocya
Harpia	13	1, 800	2013-02-13	730	Camtur
Harpia	13	1, 800	2013-02-13	730	Capnig
Harpia	13	1, 800	2013-02-13	730	Cercin
Harpia	13	1, 800	2013-02-13	730	Colplu
Harpia	13	1, 800	2013-02-13	730	Geomon
Harpia	13	1, 800	2013-02-13	730	Hylhyp
Harpia	13	1, 800	2013-02-13	730	Hylpoe
Harpia	13	1, 800	2013-02-13	730	Hypcan
Harpia	13	1, 800	2013-02-13	730	Liotho
Harpia	13	1, 800	2013-02-13	730	Myrmyo
Harpia	13	1, 800	2013-02-13	730	Picchr
Harpia	13	1, 800	2013-02-13	730	Thamur
Harpia	13	1, 800	2013-02-13	730	Thasch
Harpia	13	1, 800	2013-02-13	730	Thrcor
Harpia	13	1, 800	2013-02-13	730	Tolass
Harpia	13	1, 800	2013-02-13	730	Trovir
Harpia	13	1, 800	2013-02-13	730	Xipgut
Harpia	13	1, 800	2013-02-13	730	Xipobs
Harpia	13	1, 800	2013-02-13	745	Camtur
Harpia	13	1, 800	2013-02-13	745	Celgra
Harpia	13	1, 800	2013-02-13	745	Cercin
Harpia	13	1, 800	2013-02-13	745	Chipar
Harpia	13	1, 800	2013-02-13	745	Colplu
Harpia	13	1, 800	2013-02-13	745	Forana
Harpia	13	1, 800	2013-02-13	745	Glyspi
Harpia	13	1, 800	2013-02-13	745	Hypcan
Harpia	13	1, 800	2013-02-13	745	Liotho
Harpia	13	1, 800	2013-02-13	745	Myrmyo
Harpia	13	1, 800	2013-02-13	745	Pitgro
Harpia	13	1, 800	2013-02-13	745	Psavir
Harpia	13	1, 800	2013-02-13	745	Thamur
Harpia	13	1, 800	2013-02-13	745	Thasch
Harpia	13	1, 800	2013-02-13	745	Thrcor
Harpia	13	1, 800	2013-02-13	745	Trovir
Harpia	13	1, 800	2013-02-13	745	Turlaw
Harpia	13	1, 800	2013-02-13	745	Unk
Harpia	13	1, 800	2013-02-13	745	Unk
Harpia	13	1, 800	2013-02-13	745	Xipgut
Harpia	13	1, 800	2013-02-13	800	Brocya
Harpia	13	1, 800	2013-02-13	800	Caccel
Harpia	13	1, 800	2013-02-13	800	Camtur
Harpia	13	1, 800	2013-02-13	800	Chipar
Harpia	13	1, 800	2013-02-13	800	Colplu
Harpia	13	1, 800	2013-02-13	800	Geomon
Harpia	13	1, 800	2013-02-13	800	Hylpoe
Harpia	13	1, 800	2013-02-13	800	Hypcan
Harpia	13	1, 800	2013-02-13	800	Liotho
Harpia	13	1, 800	2013-02-13	800	Myrmyo
Harpia	13	1, 800	2013-02-13	800	Nonbru
Harpia	13	1, 800	2013-02-13	800	Pitgro
Harpia	13	1, 800	2013-02-13	800	Ramtuc
Harpia	13	1, 800	2013-02-13	800	Thamur
Harpia	13	1, 800	2013-02-13	800	Trovir
Harpia	13	1, 800	2013-02-13	800	Turlaw
Harpia	13	1, 800	2013-02-13	800	Unk
Harpia	13	1, 800	2013-02-13	800	Xipgut
Harpia	13	10, 200	2013-02-17	545	Abucum
Harpia	13	10, 200	2013-02-17	545	Barmar
Harpia	13	10, 200	2013-02-17	545	Cryvar
Harpia	13	10, 200	2013-02-17	545	Otuwat
Harpia	13	10, 200	2013-02-17	545	Turlaw
Harpia	13	10, 200	2013-02-17	600	Barmar
Harpia	13	10, 200	2013-02-17	600	Buccap
Harpia	13	10, 200	2013-02-17	600	Cryvar
Harpia	13	10, 200	2013-02-17	600	Liotho
Harpia	13	10, 200	2013-02-17	600	Thamur
Harpia	13	10, 200	2013-02-17	600	Thamur
Harpia	13	10, 200	2013-02-17	600	Turlaw
Harpia	13	10, 200	2013-02-17	600	Xipgut
Harpia	13	10, 200	2013-02-17	615	Colplu
Harpia	13	10, 200	2013-02-17	615	Cryvar
Harpia	13	10, 200	2013-02-17	615	Geomon
Harpia	13	10, 200	2013-02-17	615	Glyspi
Harpia	13	10, 200	2013-02-17	615	Liotho
Harpia	13	10, 200	2013-02-17	615	Lipvoc
Harpia	13	10, 200	2013-02-17	615	Myraxi
Harpia	13	10, 200	2013-02-17	615	Myrmen
Harpia	13	10, 200	2013-02-17	615	Thaard
Harpia	13	10, 200	2013-02-17	615	Thamur
Harpia	13	10, 200	2013-02-17	615	Thasch
Harpia	13	10, 200	2013-02-17	615	Turlaw
Harpia	13	10, 200	2013-02-17	615	Unk
Harpia	13	10, 200	2013-02-17	615	Unk
Harpia	13	10, 200	2013-02-17	630	Amafar
Harpia	13	10, 200	2013-02-17	630	Colplu
Harpia	13	10, 200	2013-02-17	630	Cymlin
Harpia	13	10, 200	2013-02-17	630	Geomon
Harpia	13	10, 200	2013-02-17	630	Hyloch
Harpia	13	10, 200	2013-02-17	630	Micmar
Harpia	13	10, 200	2013-02-17	630	Myitub
Harpia	13	10, 200	2013-02-17	630	Myraxi
Harpia	13	10, 200	2013-02-17	630	Myrmen
Harpia	13	10, 200	2013-02-17	630	Ramtuc
Harpia	13	10, 200	2013-02-17	630	Unk
Harpia	13	10, 200	2013-02-17	630	Unk
Harpia	13	10, 200	2013-02-17	630	Xipgut
Harpia	13	10, 200	2013-02-17	645	Amafar
Harpia	13	10, 200	2013-02-17	645	Cymlin
Harpia	13	10, 200	2013-02-17	645	Glyspi
Harpia	13	10, 200	2013-02-17	645	Lipvoc
Harpia	13	10, 200	2013-02-17	645	Myraxi
Harpia	13	10, 200	2013-02-17	645	Myrmyo
Harpia	13	10, 200	2013-02-17	645	Ramtuc
Harpia	13	10, 200	2013-02-17	645	Thacae
Harpia	13	10, 200	2013-02-17	645	Turalb
Harpia	13	10, 200	2013-02-17	645	Unk
Harpia	13	10, 200	2013-02-17	645	Unk
Harpia	13	10, 200	2013-02-17	700	Amafar
Harpia	13	10, 200	2013-02-17	700	Hylpoe
Harpia	13	10, 200	2013-02-17	700	Lipvoc
Harpia	13	10, 200	2013-02-17	700	Rammel
Harpia	13	10, 200	2013-02-17	700	Thasch
Harpia	13	10, 200	2013-02-17	700	Tolass
Harpia	13	10, 200	2013-02-17	700	Turalb
Harpia	13	10, 200	2013-02-17	700	Unk
Harpia	13	10, 200	2013-02-17	700	Unk
Harpia	13	10, 200	2013-02-17	700	Unk	Terenura?
Harpia	13	10, 200	2013-02-17	715	Amafar
Harpia	13	10, 200	2013-02-17	715	Camrub
Harpia	13	10, 200	2013-02-17	715	Capnig
Harpia	13	10, 200	2013-02-17	715	Hylpoe
Harpia	13	10, 200	2013-02-17	715	Lipvoc
Harpia	13	10, 200	2013-02-17	715	Myrmyo
Harpia	13	10, 200	2013-02-17	715	Ramtuc
Harpia	13	10, 200	2013-02-17	715	Thasch
Harpia	13	10, 200	2013-02-17	715	Trovir
Harpia	13	10, 200	2013-02-17	730	Diccin
Harpia	13	10, 200	2013-02-17	730	Myrmyo
Harpia	13	10, 200	2013-02-17	730	Thasch
Harpia	13	10, 200	2013-02-17	745	Henleu
Harpia	13	10, 200	2013-02-17	745	Myrcam
Harpia	13	10, 200	2013-02-17	745	Thasch
Harpia	13	10, 200	2013-02-17	745	Tromel
Harpia	13	10, 200	2013-02-17	800	Aramac
Harpia	13	10, 200	2013-02-17	800	Cymlin
Harpia	13	10, 200	2013-02-17	800	Hylnae
Harpia	13	10, 200	2013-02-17	800	Lipvoc
Harpia	13	10, 200	2013-02-17	800	Trovir
Harpia	13	10, 200	2013-02-17	800	Xipgut
Harpia	13	10, 600	2013-02-12	545	Jacaur
Harpia	13	10, 600	2013-02-12	545	Myrfor
Harpia	13	10, 600	2013-02-12	545	Nycoce
Harpia	13	10, 600	2013-02-12	545	Turalb
Harpia	13	10, 600	2013-02-12	545	Xipgut
Harpia	13	10, 600	2013-02-12	600	Capnig
Harpia	13	10, 600	2013-02-12	600	Galalb
Harpia	13	10, 600	2013-02-12	600	Hyphyp
Harpia	13	10, 600	2013-02-12	600	Liotho
Harpia	13	10, 600	2013-02-12	600	Myrbra
Harpia	13	10, 600	2013-02-12	600	Myrfor
Harpia	13	10, 600	2013-02-12	600	Pygste
Harpia	13	10, 600	2013-02-12	600	Ramtuc
Harpia	13	10, 600	2013-02-12	600	Thaard
Harpia	13	10, 600	2013-02-12	600	Thamur
Harpia	13	10, 600	2013-02-12	600	Thasch
Harpia	13	10, 600	2013-02-12	600	Troruf
Harpia	13	10, 600	2013-02-12	600	Turalb
Harpia	13	10, 600	2013-02-12	600	Unk
Harpia	13	10, 600	2013-02-12	600	Unk
Harpia	13	10, 600	2013-02-12	600	Xipgut
Harpia	13	10, 600	2013-02-12	615	Amafar
Harpia	13	10, 600	2013-02-12	615	Capnig
Harpia	13	10, 600	2013-02-12	615	Celgra
Harpia	13	10, 600	2013-02-12	615	Colplu
Harpia	13	10, 600	2013-02-12	615	Colplu
Harpia	13	10, 600	2013-02-12	615	Galalb
Harpia	13	10, 600	2013-02-12	615	Geomon
Harpia	13	10, 600	2013-02-12	615	Herdug
Harpia	13	10, 600	2013-02-12	615	Hypcan
Harpia	13	10, 600	2013-02-12	615	Hyphyp
Harpia	13	10, 600	2013-02-12	615	Hyphyp
Harpia	13	10, 600	2013-02-12	615	Liotho
Harpia	13	10, 600	2013-02-12	615	Myrbra
Harpia	13	10, 600	2013-02-12	615	Myrmyo
Harpia	13	10, 600	2013-02-12	615	Pygste
Harpia	13	10, 600	2013-02-12	615	Ramtuc
Harpia	13	10, 600	2013-02-12	615	Ramvit
Harpia	13	10, 600	2013-02-12	615	Thaard
Harpia	13	10, 600	2013-02-12	615	Thamur
Harpia	13	10, 600	2013-02-12	615	Thasch
Harpia	13	10, 600	2013-02-12	615	Tingut
Harpia	13	10, 600	2013-02-12	615	Tolass
Harpia	13	10, 600	2013-02-12	615	Troruf
Harpia	13	10, 600	2013-02-12	615	Turalb
Harpia	13	10, 600	2013-02-12	615	Unk
Harpia	13	10, 600	2013-02-12	630	Amafar
Harpia	13	10, 600	2013-02-12	630	Cammel
Harpia	13	10, 600	2013-02-12	630	Capnig
Harpia	13	10, 600	2013-02-12	630	Cercin
Harpia	13	10, 600	2013-02-12	630	Galalb
Harpia	13	10, 600	2013-02-12	630	Geomon
Harpia	13	10, 600	2013-02-12	630	Herdug
Harpia	13	10, 600	2013-02-12	630	Herdug
Harpia	13	10, 600	2013-02-12	630	Hypcan
Harpia	13	10, 600	2013-02-12	630	Myrbra
Harpia	13	10, 600	2013-02-12	630	Myrmyo
Harpia	13	10, 600	2013-02-12	630	Piomen
Harpia	13	10, 600	2013-02-12	630	Ramtuc
Harpia	13	10, 600	2013-02-12	630	Ramvit
Harpia	13	10, 600	2013-02-12	630	Thamur
Harpia	13	10, 600	2013-02-12	630	Thasch
Harpia	13	10, 600	2013-02-12	630	Tolass
Harpia	13	10, 600	2013-02-12	630	Troruf
Harpia	13	10, 600	2013-02-12	630	Unk
Harpia	13	10, 600	2013-02-12	630	Unk
Harpia	13	10, 600	2013-02-12	630	Unk
Harpia	13	10, 600	2013-02-12	630	Unk
Harpia	13	10, 600	2013-02-12	645	Amafar
Harpia	13	10, 600	2013-02-12	645	Capnig
Harpia	13	10, 600	2013-02-12	645	Cercin
Harpia	13	10, 600	2013-02-12	645	Colplu
Harpia	13	10, 600	2013-02-12	645	Hylhyp
Harpia	13	10, 600	2013-02-12	645	Hypcan
Harpia	13	10, 600	2013-02-12	645	Myrbra
Harpia	13	10, 600	2013-02-12	645	Ramvit
Harpia	13	10, 600	2013-02-12	645	Thasch
Harpia	13	10, 600	2013-02-12	645	Tolass
Harpia	13	10, 600	2013-02-12	645	Troruf
Harpia	13	10, 600	2013-02-12	645	Trovir
Harpia	13	10, 600	2013-02-12	645	Unk
Harpia	13	10, 600	2013-02-12	645	Unk
Harpia	13	10, 600	2013-02-12	700	Amafar
Harpia	13	10, 600	2013-02-12	700	Brocya
Harpia	13	10, 600	2013-02-12	700	Capnig
Harpia	13	10, 600	2013-02-12	700	Celgra
Harpia	13	10, 600	2013-02-12	700	Cercin
Harpia	13	10, 600	2013-02-12	700	Colplu
Harpia	13	10, 600	2013-02-12	700	Cymlin
Harpia	13	10, 600	2013-02-12	700	Freund
Harpia	13	10, 600	2013-02-12	700	Galalb
Harpia	13	10, 600	2013-02-12	700	Geomon
Harpia	13	10, 600	2013-02-12	700	Hemzos
Harpia	13	10, 600	2013-02-12	700	Hylhyp
Harpia	13	10, 600	2013-02-12	700	Hypcan
Harpia	13	10, 600	2013-02-12	700	Liotho
Harpia	13	10, 600	2013-02-12	700	Pippip
Harpia	13	10, 600	2013-02-12	700	Ramtuc
Harpia	13	10, 600	2013-02-12	700	Tolass
Harpia	13	10, 600	2013-02-12	700	Troruf
Harpia	13	10, 600	2013-02-12	700	Turalb
Harpia	13	10, 600	2013-02-12	700	Unk
Harpia	13	10, 600	2013-02-12	700	Xipgut
Harpia	13	10, 600	2013-02-12	715	Amafar
Harpia	13	10, 600	2013-02-12	715	Autmel
Harpia	13	10, 600	2013-02-12	715	Capnig
Harpia	13	10, 600	2013-02-12	715	Celgra
Harpia	13	10, 600	2013-02-12	715	Cercin
Harpia	13	10, 600	2013-02-12	715	Colplu
Harpia	13	10, 600	2013-02-12	715	Cymlin
Harpia	13	10, 600	2013-02-12	715	Freund
Harpia	13	10, 600	2013-02-12	715	Galalb
Harpia	13	10, 600	2013-02-12	715	Geomon
Harpia	13	10, 600	2013-02-12	715	Hypcan
Harpia	13	10, 600	2013-02-12	715	Myrcam
Harpia	13	10, 600	2013-02-12	715	Myrfor
Harpia	13	10, 600	2013-02-12	715	Piomen
Harpia	13	10, 600	2013-02-12	715	Pippip
Harpia	13	10, 600	2013-02-12	715	Psavir
Harpia	13	10, 600	2013-02-12	715	Psavir
Harpia	13	10, 600	2013-02-12	715	Ramtuc
Harpia	13	10, 600	2013-02-12	715	Ramvit
Harpia	13	10, 600	2013-02-12	715	Tingut
Harpia	13	10, 600	2013-02-12	715	Tolass
Harpia	13	10, 600	2013-02-12	715	Troruf
Harpia	13	10, 600	2013-02-12	715	Trovir
Harpia	13	10, 600	2013-02-12	715	Unk
Harpia	13	10, 600	2013-02-12	730	Amafar
Harpia	13	10, 600	2013-02-12	730	Capnig
Harpia	13	10, 600	2013-02-12	730	Glyspi
Harpia	13	10, 600	2013-02-12	730	Hemzos
Harpia	13	10, 600	2013-02-12	730	Hylhyp
Harpia	13	10, 600	2013-02-12	730	Hylsub
Harpia	13	10, 600	2013-02-12	730	Hypcan
Harpia	13	10, 600	2013-02-12	730	Hyphyp
Harpia	13	10, 600	2013-02-12	730	Micmar
Harpia	13	10, 600	2013-02-12	730	Myrbra
Harpia	13	10, 600	2013-02-12	730	Psavir
Harpia	13	10, 600	2013-02-12	730	Ramtuc
Harpia	13	10, 600	2013-02-12	730	Thamur
Harpia	13	10, 600	2013-02-12	730	Thamur
Harpia	13	10, 600	2013-02-12	730	Tingut
Harpia	13	10, 600	2013-02-12	730	Tolass
Harpia	13	10, 600	2013-02-12	730	Troruf
Harpia	13	10, 600	2013-02-12	730	Turalb
Harpia	13	10, 600	2013-02-12	730	Unk
Harpia	13	10, 600	2013-02-12	730	Unk
Harpia	13	10, 600	2013-02-12	745	Amafar
Harpia	13	10, 600	2013-02-12	745	Capnig
Harpia	13	10, 600	2013-02-12	745	Colplu
Harpia	13	10, 600	2013-02-12	745	Cymlin
Harpia	13	10, 600	2013-02-12	745	Hemzos
Harpia	13	10, 600	2013-02-12	745	Henleu
Harpia	13	10, 600	2013-02-12	745	Hylsub
Harpia	13	10, 600	2013-02-12	745	Hypcan
Harpia	13	10, 600	2013-02-12	745	Liotho
Harpia	13	10, 600	2013-02-12	745	Myrbra
Harpia	13	10, 600	2013-02-12	745	Psavir
Harpia	13	10, 600	2013-02-12	745	Thamur
Harpia	13	10, 600	2013-02-12	745	Tingut
Harpia	13	10, 600	2013-02-12	745	Tolass
Harpia	13	10, 600	2013-02-12	745	Tromel
Harpia	13	10, 600	2013-02-12	745	Troruf
Harpia	13	10, 600	2013-02-12	800	Amafar
Harpia	13	10, 600	2013-02-12	800	Capnig
Harpia	13	10, 600	2013-02-12	800	Cymlin
Harpia	13	10, 600	2013-02-12	800	Freund
Harpia	13	10, 600	2013-02-12	800	Hemzos
Harpia	13	10, 600	2013-02-12	800	Henleu
Harpia	13	10, 600	2013-02-12	800	Hypcan
Harpia	13	10, 600	2013-02-12	800	Myrbra
Harpia	13	10, 600	2013-02-12	800	Psavir
Harpia	13	2, 200	2013-02-17	545	Cichuh
Harpia	13	2, 200	2013-02-17	545	Nycaet
Harpia	13	2, 200	2013-02-17	545	Otuwat
Harpia	13	2, 200	2013-02-17	600	Amafar
Harpia	13	2, 200	2013-02-17	600	Atispa
Harpia	13	2, 200	2013-02-17	600	Barmar
Harpia	13	2, 200	2013-02-17	600	Denruf
Harpia	13	2, 200	2013-02-17	600	Forana
Harpia	13	2, 200	2013-02-17	600	Hypcan
Harpia	13	2, 200	2013-02-17	600	Myrmyo
Harpia	13	2, 200	2013-02-17	600	Nycoce
Harpia	13	2, 200	2013-02-17	600	Pitgro
Harpia	13	2, 200	2013-02-17	600	Tinmaj
Harpia	13	2, 200	2013-02-17	600	Turlaw
Harpia	13	2, 200	2013-02-17	600	Unk
Harpia	13	2, 200	2013-02-17	600	Xipgut
Harpia	13	2, 200	2013-02-17	615	Atispa
Harpia	13	2, 200	2013-02-17	615	Camtur
Harpia	13	2, 200	2013-02-17	615	Cercin
Harpia	13	2, 200	2013-02-17	615	Micruf
Harpia	13	2, 200	2013-02-17	615	Myrcam
Harpia	13	2, 200	2013-02-17	615	Thamur
Harpia	13	2, 200	2013-02-17	615	Tinmaj
Harpia	13	2, 200	2013-02-17	615	Tromel
Harpia	13	2, 200	2013-02-17	615	Unk
Harpia	13	2, 200	2013-02-17	615	Xipgut
Harpia	13	2, 200	2013-02-17	630	Atispa
Harpia	13	2, 200	2013-02-17	630	Capnig
Harpia	13	2, 200	2013-02-17	630	Cercin
Harpia	13	2, 200	2013-02-17	630	Cymlin
Harpia	13	2, 200	2013-02-17	630	Gymleu
Harpia	13	2, 200	2013-02-17	630	Myrcam
Harpia	13	2, 200	2013-02-17	630	Myrmyo
Harpia	13	2, 200	2013-02-17	630	Naslon
Harpia	13	2, 200	2013-02-17	630	Piomel
Harpia	13	2, 200	2013-02-17	630	Thasch
Harpia	13	2, 200	2013-02-17	630	Tolass
Harpia	13	2, 200	2013-02-17	630	Unk
Harpia	13	2, 200	2013-02-17	630	Unk
Harpia	13	2, 200	2013-02-17	630	Xipgut
Harpia	13	2, 200	2013-02-17	645	Amafar
Harpia	13	2, 200	2013-02-17	645	Amafar
Harpia	13	2, 200	2013-02-17	645	Colplu
Harpia	13	2, 200	2013-02-17	645	Colplu
Harpia	13	2, 200	2013-02-17	645	Hylpoe
Harpia	13	2, 200	2013-02-17	645	Hylpoe
Harpia	13	2, 200	2013-02-17	645	Liotho
Harpia	13	2, 200	2013-02-17	645	Myrcam
Harpia	13	2, 200	2013-02-17	645	Myrcam
Harpia	13	2, 200	2013-02-17	645	Naslon
Harpia	13	2, 200	2013-02-17	645	Naslon
Harpia	13	2, 200	2013-02-17	645	Pitgro
Harpia	13	2, 200	2013-02-17	645	Pitgro
Harpia	13	2, 200	2013-02-17	645	Thasch
Harpia	13	2, 200	2013-02-17	645	Thasch
Harpia	13	2, 200	2013-02-17	645	Xipgut
Harpia	13	2, 200	2013-02-17	645	Xipgut
Harpia	13	2, 200	2013-02-17	700	Barmar
Harpia	13	2, 200	2013-02-17	700	Capnig
Harpia	13	2, 200	2013-02-17	700	Cercin
Harpia	13	2, 200	2013-02-17	700	Hylpoe
Harpia	13	2, 200	2013-02-17	700	Myrcam
Harpia	13	2, 200	2013-02-17	700	Naslon
Harpia	13	2, 200	2013-02-17	700	Pitgro
Harpia	13	2, 200	2013-02-17	700	Quepur
Harpia	13	2, 200	2013-02-17	700	Thasch
Harpia	13	2, 200	2013-02-17	700	Tinmaj
Harpia	13	2, 200	2013-02-17	700	Trovir
Harpia	13	2, 200	2013-02-17	715	Camtur
Harpia	13	2, 200	2013-02-17	715	Myrcam
Harpia	13	2, 200	2013-02-17	715	Naslon
Harpia	13	2, 200	2013-02-17	715	Pitgro
Harpia	13	2, 200	2013-02-17	715	Pteplu
Harpia	13	2, 200	2013-02-17	715	Ramtuc
Harpia	13	2, 200	2013-02-17	715	Trovir
Harpia	13	2, 200	2013-02-17	730	Aramac
Harpia	13	2, 200	2013-02-17	730	Camtur
Harpia	13	2, 200	2013-02-17	730	Myrcam
Harpia	13	2, 200	2013-02-17	730	Pitgro
Harpia	13	2, 200	2013-02-17	730	Quepur
Harpia	13	2, 200	2013-02-17	745	Camtur
Harpia	13	2, 200	2013-02-17	745	Capnig
Harpia	13	2, 200	2013-02-17	745	Colplu
Harpia	13	2, 200	2013-02-17	745	Cymlin
Harpia	13	2, 200	2013-02-17	745	Dapame
Harpia	13	2, 200	2013-02-17	745	Myrcam
Harpia	13	2, 200	2013-02-17	745	Pitgro
Harpia	13	2, 200	2013-02-17	745	Quepur
Harpia	13	2, 200	2013-02-17	745	Trovir
Harpia	13	2, 200	2013-02-17	745	Unk
Harpia	13	2, 200	2013-02-17	800	Barmar
Harpia	13	2, 200	2013-02-17	800	Capnig
Harpia	13	2, 200	2013-02-17	800	Colplu
Harpia	13	2, 200	2013-02-17	800	Dapame
Harpia	13	2, 200	2013-02-17	800	Myrcam
Harpia	13	2, 200	2013-02-17	800	Pitgro
Harpia	13	2, 200	2013-02-17	800	Psavir
Harpia	13	2, 200	2013-02-17	800	Trovir
Harpia	13	2, 200	2013-02-17	800	Unk
Harpia	13	2, 600	2013-02-13	545	Barmar
Harpia	13	2, 600	2013-02-13	545	Cichuh
Harpia	13	2, 600	2013-02-13	545	Hylsub
Harpia	13	2, 600	2013-02-13	545	Nycaet
Harpia	13	2, 600	2013-02-13	545	Nycoce
Harpia	13	2, 600	2013-02-13	545	Otuwat
Harpia	13	2, 600	2013-02-13	545	Tinmaj
Harpia	13	2, 600	2013-02-13	600	Atispa
Harpia	13	2, 600	2013-02-13	600	Autruf
Harpia	13	2, 600	2013-02-13	600	Buccap
Harpia	13	2, 600	2013-02-13	600	Capnig
Harpia	13	2, 600	2013-02-13	600	Cortor
Harpia	13	2, 600	2013-02-13	600	Cymlin
Harpia	13	2, 600	2013-02-13	600	Henleu
Harpia	13	2, 600	2013-02-13	600	Hylnae
Harpia	13	2, 600	2013-02-13	600	Hylsub
Harpia	13	2, 600	2013-02-13	600	Liotho
Harpia	13	2, 600	2013-02-13	600	Micmar
Harpia	13	2, 600	2013-02-13	600	Myrcam
Harpia	13	2, 600	2013-02-13	600	Myrfor
Harpia	13	2, 600	2013-02-13	600	Myrmyo
Harpia	13	2, 600	2013-02-13	600	Pygste
Harpia	13	2, 600	2013-02-13	600	Thasch
Harpia	13	2, 600	2013-02-13	600	Unk
Harpia	13	2, 600	2013-02-13	600	Xipgut
Harpia	13	2, 600	2013-02-13	615	Atispa
Harpia	13	2, 600	2013-02-13	615	Autinf
Harpia	13	2, 600	2013-02-13	615	Autruf
Harpia	13	2, 600	2013-02-13	615	Brocya
Harpia	13	2, 600	2013-02-13	615	Camtur
Harpia	13	2, 600	2013-02-13	615	Capnig
Harpia	13	2, 600	2013-02-13	615	Colplu
Harpia	13	2, 600	2013-02-13	615	Cymlin
Harpia	13	2, 600	2013-02-13	615	Denruf
Harpia	13	2, 600	2013-02-13	615	Henleu
Harpia	13	2, 600	2013-02-13	615	Liotho
Harpia	13	2, 600	2013-02-13	615	Myrfor
Harpia	13	2, 600	2013-02-13	615	Myrhau
Harpia	13	2, 600	2013-02-13	615	Piomel
Harpia	13	2, 600	2013-02-13	615	Pitgro
Harpia	13	2, 600	2013-02-13	615	Rammel
Harpia	13	2, 600	2013-02-13	615	Ramtuc
Harpia	13	2, 600	2013-02-13	615	Tinmaj
Harpia	13	2, 600	2013-02-13	615	Turlaw
Harpia	13	2, 600	2013-02-13	615	Unk
Harpia	13	2, 600	2013-02-13	615	Unk
Harpia	13	2, 600	2013-02-13	630	Atispa
Harpia	13	2, 600	2013-02-13	630	Camtur
Harpia	13	2, 600	2013-02-13	630	Capnig
Harpia	13	2, 600	2013-02-13	630	Celgra
Harpia	13	2, 600	2013-02-13	630	Cercin
Harpia	13	2, 600	2013-02-13	630	Chipar
Harpia	13	2, 600	2013-02-13	630	Colplu
Harpia	13	2, 600	2013-02-13	630	Cymlin
Harpia	13	2, 600	2013-02-13	630	Liotho
Harpia	13	2, 600	2013-02-13	630	Mioole
Harpia	13	2, 600	2013-02-13	630	Piomen
Harpia	13	2, 600	2013-02-13	630	Pygste
Harpia	13	2, 600	2013-02-13	630	Schleu
Harpia	13	2, 600	2013-02-13	630	Xipgut
Harpia	13	2, 600	2013-02-13	645	Amafar
Harpia	13	2, 600	2013-02-13	645	Autinf
Harpia	13	2, 600	2013-02-13	645	Chipar
Harpia	13	2, 600	2013-02-13	645	Colplu
Harpia	13	2, 600	2013-02-13	645	Liotho
Harpia	13	2, 600	2013-02-13	645	Mioole
Harpia	13	2, 600	2013-02-13	645	Pitgro
Harpia	13	2, 600	2013-02-13	645	Xipgut
Harpia	13	2, 600	2013-02-13	700	Autinf
Harpia	13	2, 600	2013-02-13	700	Cammel
Harpia	13	2, 600	2013-02-13	700	Camtur
Harpia	13	2, 600	2013-02-13	700	Chipar
Harpia	13	2, 600	2013-02-13	700	Colplu
Harpia	13	2, 600	2013-02-13	700	Liotho
Harpia	13	2, 600	2013-02-13	700	Mioole
Harpia	13	2, 600	2013-02-13	700	Myrcam
Harpia	13	2, 600	2013-02-13	700	Myrfor
Harpia	13	2, 600	2013-02-13	700	Thasch
Harpia	13	2, 600	2013-02-13	700	Unk
Harpia	13	2, 600	2013-02-13	700	Xipgut
Harpia	13	2, 600	2013-02-13	715	Cercin
Harpia	13	2, 600	2013-02-13	715	Chipar
Harpia	13	2, 600	2013-02-13	715	Colplu
Harpia	13	2, 600	2013-02-13	715	Liotho
Harpia	13	2, 600	2013-02-13	715	Mioole
Harpia	13	2, 600	2013-02-13	715	Myrbra
Harpia	13	2, 600	2013-02-13	715	Myrcam
Harpia	13	2, 600	2013-02-13	715	Myrfor
Harpia	13	2, 600	2013-02-13	715	Pitgro
Harpia	13	2, 600	2013-02-13	715	Pitgro
Harpia	13	2, 600	2013-02-13	715	Troruf
Harpia	13	2, 600	2013-02-13	715	Unk
Harpia	13	2, 600	2013-02-13	715	Unk
Harpia	13	2, 600	2013-02-13	715	Xipgut
Harpia	13	2, 600	2013-02-13	730	Camtur
Harpia	13	2, 600	2013-02-13	730	Chipar
Harpia	13	2, 600	2013-02-13	730	Colplu
Harpia	13	2, 600	2013-02-13	730	Liotho
Harpia	13	2, 600	2013-02-13	730	Micmar
Harpia	13	2, 600	2013-02-13	730	Mioole
Harpia	13	2, 600	2013-02-13	730	Myrbra
Harpia	13	2, 600	2013-02-13	730	Tolass
Harpia	13	2, 600	2013-02-13	730	Troruf
Harpia	13	2, 600	2013-02-13	730	Trovir
Harpia	13	2, 600	2013-02-13	745	Camtur
Harpia	13	2, 600	2013-02-13	745	Chipar
Harpia	13	2, 600	2013-02-13	745	Colplu
Harpia	13	2, 600	2013-02-13	745	Liotho
Harpia	13	2, 600	2013-02-13	745	Mioole
Harpia	13	2, 600	2013-02-13	745	Myrcam
Harpia	13	2, 600	2013-02-13	745	Pitgro
Harpia	13	2, 600	2013-02-13	745	Psavir
Harpia	13	2, 600	2013-02-13	745	Tolass
Harpia	13	2, 600	2013-02-13	745	Troruf
Harpia	13	2, 600	2013-02-13	745	Xipgut
Harpia	13	2, 600	2013-02-13	800	Camtur
Harpia	13	2, 600	2013-02-13	800	Capnig
Harpia	13	2, 600	2013-02-13	800	Cercin
Harpia	13	2, 600	2013-02-13	800	Chipar
Harpia	13	2, 600	2013-02-13	800	Colplu
Harpia	13	2, 600	2013-02-13	800	Henleu
Harpia	13	2, 600	2013-02-13	800	Hylsub
Harpia	13	2, 600	2013-02-13	800	Liotho
Harpia	13	2, 600	2013-02-13	800	Mioole
Harpia	13	2, 600	2013-02-13	800	Myrcam
Harpia	13	2, 600	2013-02-13	800	Myrfor
Harpia	13	2, 600	2013-02-13	800	Piomel
Harpia	13	2, 600	2013-02-13	800	Quepur
Harpia	13	2, 600	2013-02-13	800	Tolass
Harpia	13	2, 600	2013-02-13	800	Troruf
Harpia	13	2, 600	2013-02-13	800	Unk
Harpia	13	3, 400	2013-02-08	545	Lopcri
Harpia	13	3, 400	2013-02-08	545	Micgil
Harpia	13	3, 400	2013-02-08	545	Nycoce
Harpia	13	3, 400	2013-02-08	545	Penjac
Harpia	13	3, 400	2013-02-08	545	Unk
Harpia	13	3, 400	2013-02-08	545	Xipgut
Harpia	13	3, 400	2013-02-08	600	Autinf
Harpia	13	3, 400	2013-02-08	600	Cercin
Harpia	13	3, 400	2013-02-08	600	Cortor
Harpia	13	3, 400	2013-02-08	600	Glyspi
Harpia	13	3, 400	2013-02-08	600	Hylpoe
Harpia	13	3, 400	2013-02-08	600	Liotho
Harpia	13	3, 400	2013-02-08	600	Myrcam
Harpia	13	3, 400	2013-02-08	600	Myrmyo
Harpia	13	3, 400	2013-02-08	600	Piomel
Harpia	13	3, 400	2013-02-08	600	Unk
Harpia	13	3, 400	2013-02-08	600	Unk
Harpia	13	3, 400	2013-02-08	600	Xipgut
Harpia	13	3, 400	2013-02-08	615	Autinf
Harpia	13	3, 400	2013-02-08	615	Celgra
Harpia	13	3, 400	2013-02-08	615	Cercin
Harpia	13	3, 400	2013-02-08	615	Denruf
Harpia	13	3, 400	2013-02-08	615	Glyspi
Harpia	13	3, 400	2013-02-08	615	Hylnae
Harpia	13	3, 400	2013-02-08	615	Hylnae
Harpia	13	3, 400	2013-02-08	615	Hylsub
Harpia	13	3, 400	2013-02-08	615	Liotho
Harpia	13	3, 400	2013-02-08	615	Micmar
Harpia	13	3, 400	2013-02-08	615	Myrmyo
Harpia	13	3, 400	2013-02-08	615	Piomel
Harpia	13	3, 400	2013-02-08	615	Rammel
Harpia	13	3, 400	2013-02-08	615	Thaard
Harpia	13	3, 400	2013-02-08	615	Thamur
Harpia	13	3, 400	2013-02-08	615	Unk
Harpia	13	3, 400	2013-02-08	615	Xipgut
Harpia	13	3, 400	2013-02-08	630	Cercin
Harpia	13	3, 400	2013-02-08	630	Colplu
Harpia	13	3, 400	2013-02-08	630	Glyspi
Harpia	13	3, 400	2013-02-08	630	Hylsub
Harpia	13	3, 400	2013-02-08	630	Hypcan
Harpia	13	3, 400	2013-02-08	630	Liotho
Harpia	13	3, 400	2013-02-08	630	Micmar
Harpia	13	3, 400	2013-02-08	630	Mioole
Harpia	13	3, 400	2013-02-08	630	Myrcam
Harpia	13	3, 400	2013-02-08	630	Myrfje
Harpia	13	3, 400	2013-02-08	630	Myrfor
Harpia	13	3, 400	2013-02-08	630	Myrmyo
Harpia	13	3, 400	2013-02-08	630	Schleu
Harpia	13	3, 400	2013-02-08	630	Terery
Harpia	13	3, 400	2013-02-08	630	Thaard
Harpia	13	3, 400	2013-02-08	630	Thacae
Harpia	13	3, 400	2013-02-08	630	Thamur
Harpia	13	3, 400	2013-02-08	630	Unk
Harpia	13	3, 400	2013-02-08	630	Xipgut
Harpia	13	3, 400	2013-02-08	645	Aramac
Harpia	13	3, 400	2013-02-08	645	Celgra
Harpia	13	3, 400	2013-02-08	645	Cercin
Harpia	13	3, 400	2013-02-08	645	Colplu
Harpia	13	3, 400	2013-02-08	645	Colplu
Harpia	13	3, 400	2013-02-08	645	Cryvar
Harpia	13	3, 400	2013-02-08	645	Freund
Harpia	13	3, 400	2013-02-08	645	Hylhyp
Harpia	13	3, 400	2013-02-08	645	Liotho
Harpia	13	3, 400	2013-02-08	645	Micmar
Harpia	13	3, 400	2013-02-08	645	Myrbra
Harpia	13	3, 400	2013-02-08	645	Myrcam
Harpia	13	3, 400	2013-02-08	645	Piomel
Harpia	13	3, 400	2013-02-08	645	Quepur
Harpia	13	3, 400	2013-02-08	645	Schleu
Harpia	13	3, 400	2013-02-08	645	Tingut
Harpia	13	3, 400	2013-02-08	645	Unk
Harpia	13	3, 400	2013-02-08	645	Unk
Harpia	13	3, 400	2013-02-08	645	Xipgut
Harpia	13	3, 400	2013-02-08	700	Amafar
Harpia	13	3, 400	2013-02-08	700	Cercin
Harpia	13	3, 400	2013-02-08	700	Colplu
Harpia	13	3, 400	2013-02-08	700	Euplan
Harpia	13	3, 400	2013-02-08	700	Freund
Harpia	13	3, 400	2013-02-08	700	Henleu
Harpia	13	3, 400	2013-02-08	700	Henleu
Harpia	13	3, 400	2013-02-08	700	Hylhyp
Harpia	13	3, 400	2013-02-08	700	Liotho
Harpia	13	3, 400	2013-02-08	700	Micmar
Harpia	13	3, 400	2013-02-08	700	Myrbra
Harpia	13	3, 400	2013-02-08	700	Myrcam
Harpia	13	3, 400	2013-02-08	700	Pitgro
Harpia	13	3, 400	2013-02-08	700	Psavir
Harpia	13	3, 400	2013-02-08	700	Unk
Harpia	13	3, 400	2013-02-08	700	Xipgut
Harpia	13	3, 400	2013-02-08	715	Amafar
Harpia	13	3, 400	2013-02-08	715	Cercin
Harpia	13	3, 400	2013-02-08	715	Colplu
Harpia	13	3, 400	2013-02-08	715	Henleu
Harpia	13	3, 400	2013-02-08	715	Hylhyp
Harpia	13	3, 400	2013-02-08	715	Hylpoe
Harpia	13	3, 400	2013-02-08	715	Liotho
Harpia	13	3, 400	2013-02-08	715	Micmar
Harpia	13	3, 400	2013-02-08	715	Mioole
Harpia	13	3, 400	2013-02-08	715	Myrcam
Harpia	13	3, 400	2013-02-08	715	Pitgro
Harpia	13	3, 400	2013-02-08	715	Tromel
Harpia	13	3, 400	2013-02-08	715	Unk
Harpia	13	3, 400	2013-02-08	715	Xipgut
Harpia	13	3, 400	2013-02-08	730	Amafar
Harpia	13	3, 400	2013-02-08	730	Brocya
Harpia	13	3, 400	2013-02-08	730	Capnig
Harpia	13	3, 400	2013-02-08	730	Cercin
Harpia	13	3, 400	2013-02-08	730	Colplu
Harpia	13	3, 400	2013-02-08	730	Freund
Harpia	13	3, 400	2013-02-08	730	Geomon
Harpia	13	3, 400	2013-02-08	730	Henleu
Harpia	13	3, 400	2013-02-08	730	Hylhyp
Harpia	13	3, 400	2013-02-08	730	Liotho
Harpia	13	3, 400	2013-02-08	730	Micgil
Harpia	13	3, 400	2013-02-08	730	Mioole
Harpia	13	3, 400	2013-02-08	730	Myigai
Harpia	13	3, 400	2013-02-08	730	Myrmyo
Harpia	13	3, 400	2013-02-08	730	Ramtuc
Harpia	13	3, 400	2013-02-08	730	Ramvit
Harpia	13	3, 400	2013-02-08	730	Schleu
Harpia	13	3, 400	2013-02-08	730	Tolass
Harpia	13	3, 400	2013-02-08	745	Cammel
Harpia	13	3, 400	2013-02-08	745	Colplu
Harpia	13	3, 400	2013-02-08	745	Colsub
Harpia	13	3, 400	2013-02-08	745	Henleu
Harpia	13	3, 400	2013-02-08	745	Myigai
Harpia	13	3, 400	2013-02-08	745	Myrbra
Harpia	13	3, 400	2013-02-08	745	Myrfor
Harpia	13	3, 400	2013-02-08	745	Ramtuc
Harpia	13	3, 400	2013-02-08	745	Unk
Harpia	13	3, 400	2013-02-08	800	Cammel
Harpia	13	3, 400	2013-02-08	800	Cercin
Harpia	13	3, 400	2013-02-08	800	Colplu
Harpia	13	3, 400	2013-02-08	800	Cyavio
Harpia	13	3, 400	2013-02-08	800	Dapame
Harpia	13	3, 400	2013-02-08	800	Forana
Harpia	13	3, 400	2013-02-08	800	Liotho
Harpia	13	3, 400	2013-02-08	800	Melcru
Harpia	13	3, 400	2013-02-08	800	Micmar
Harpia	13	3, 400	2013-02-08	800	Micmar
Harpia	13	3, 400	2013-02-08	800	Myigai
Harpia	13	3, 400	2013-02-08	800	Myitub
Harpia	13	3, 400	2013-02-08	800	Myrbra
Harpia	13	3, 400	2013-02-08	800	Myrfor
Harpia	13	3, 400	2013-02-08	800	Ramtuc
Harpia	13	3, 400	2013-02-08	800	Schleu
Harpia	13	3, 400	2013-02-08	800	Unk
Harpia	13	3, -50	2013-02-25	545	Barmar
Harpia	13	3, -50	2013-02-25	545	Cichuh
Harpia	13	3, -50	2013-02-25	545	Denruf
Harpia	13	3, -50	2013-02-25	545	Jacaur
Harpia	13	3, -50	2013-02-25	545	Nycaet
Harpia	13	3, -50	2013-02-25	545	Nycgri
Harpia	13	3, -50	2013-02-25	600	Barmar
Harpia	13	3, -50	2013-02-25	600	Buccap
Harpia	13	3, -50	2013-02-25	600	Chipar
Harpia	13	3, -50	2013-02-25	600	Dapame
Harpia	13	3, -50	2013-02-25	600	Denruf
Harpia	13	3, -50	2013-02-25	600	Micgil
Harpia	13	3, -50	2013-02-25	600	Myrfor
Harpia	13	3, -50	2013-02-25	600	Nonbru
Harpia	13	3, -50	2013-02-25	600	Thasch
Harpia	13	3, -50	2013-02-25	600	Unk
Harpia	13	3, -50	2013-02-25	600	Unk
Harpia	13	3, -50	2013-02-25	600	Unk
Harpia	13	3, -50	2013-02-25	600	Unk
Harpia	13	3, -50	2013-02-25	600	Xipgut
Harpia	13	3, -50	2013-02-25	615	Chipar
Harpia	13	3, -50	2013-02-25	615	Geomon
Harpia	13	3, -50	2013-02-25	615	Glyspi
Harpia	13	3, -50	2013-02-25	615	Hylpoe
Harpia	13	3, -50	2013-02-25	615	Penjac
Harpia	13	3, -50	2013-02-25	615	Pitgro
Harpia	13	3, -50	2013-02-25	615	Ramtuc
Harpia	13	3, -50	2013-02-25	615	Thasch
Harpia	13	3, -50	2013-02-25	615	Unk
Harpia	13	3, -50	2013-02-25	615	Xipgut
Harpia	13	3, -50	2013-02-27	630	Arasev
Harpia	13	3, -50	2013-02-27	630	Atispa
Harpia	13	3, -50	2013-02-27	630	Chipar
Harpia	13	3, -50	2013-02-27	630	Cryvar
Harpia	13	3, -50	2013-02-27	630	Glyspi
Harpia	13	3, -50	2013-02-27	630	Myrfor
Harpia	13	3, -50	2013-02-27	630	Myrmyo
Harpia	13	3, -50	2013-02-27	630	Nonbru
Harpia	13	3, -50	2013-02-27	630	Pipchl
Harpia	13	3, -50	2013-02-27	630	Quepur
Harpia	13	3, -50	2013-02-27	630	Ramtuc
Harpia	13	3, -50	2013-02-27	630	Thasch
Harpia	13	3, -50	2013-02-27	630	Tingut
Harpia	13	3, -50	2013-02-27	630	Unk
Harpia	13	3, -50	2013-02-25	645	Capnig
Harpia	13	3, -50	2013-02-25	645	Cercin
Harpia	13	3, -50	2013-02-25	645	Chipar
Harpia	13	3, -50	2013-02-25	645	Colplu
Harpia	13	3, -50	2013-02-25	645	Glyspi
Harpia	13	3, -50	2013-02-25	645	Myrfor
Harpia	13	3, -50	2013-02-25	645	Myrmyo
Harpia	13	3, -50	2013-02-25	645	Psavir
Harpia	13	3, -50	2013-02-25	645	Rhemel
Harpia	13	3, -50	2013-02-25	645	Thasch
Harpia	13	3, -50	2013-02-25	645	Unk
Harpia	13	3, -50	2013-02-25	645	Unk
Harpia	13	3, -50	2013-02-25	645	Unk
Harpia	13	3, -50	2013-02-25	700	Brocya
Harpia	13	3, -50	2013-02-25	700	Capnig
Harpia	13	3, -50	2013-02-25	700	Cercin
Harpia	13	3, -50	2013-02-25	700	Chipar
Harpia	13	3, -50	2013-02-25	700	Colplu
Harpia	13	3, -50	2013-02-25	700	Myrfor
Harpia	13	3, -50	2013-02-25	700	Myrmyo
Harpia	13	3, -50	2013-02-25	700	Pitgro
Harpia	13	3, -50	2013-02-25	700	Quepur
Harpia	13	3, -50	2013-02-25	700	Thasch
Harpia	13	3, -50	2013-02-25	700	Unk
Harpia	13	3, -50	2013-02-25	715	Cammel
Harpia	13	3, -50	2013-02-25	715	Capnig
Harpia	13	3, -50	2013-02-25	715	Cercin
Harpia	13	3, -50	2013-02-25	715	Colplu
Harpia	13	3, -50	2013-02-25	715	Hylpoe
Harpia	13	3, -50	2013-02-25	715	Micmar
Harpia	13	3, -50	2013-02-25	715	Myrmyo
Harpia	13	3, -50	2013-02-25	715	Pitgro
Harpia	13	3, -50	2013-02-25	715	Ramtuc
Harpia	13	3, -50	2013-02-25	715	Thasch
Harpia	13	3, -50	2013-02-25	715	Unk
Harpia	13	3, -50	2013-02-25	730	Amafar
Harpia	13	3, -50	2013-02-25	730	Capnig
Harpia	13	3, -50	2013-02-25	730	Cercin
Harpia	13	3, -50	2013-02-25	730	Chipar
Harpia	13	3, -50	2013-02-25	730	Colplu
Harpia	13	3, -50	2013-02-25	730	Pitgro
Harpia	13	3, -50	2013-02-25	730	Ramtuc
Harpia	13	3, -50	2013-02-25	730	Thrcor
Harpia	13	3, -50	2013-02-25	730	Unk
Harpia	13	3, -50	2013-02-25	730	Unk
Harpia	13	3, -50	2013-02-25	745	Capnig
Harpia	13	3, -50	2013-02-25	745	Cercin
Harpia	13	3, -50	2013-02-25	745	Chipar
Harpia	13	3, -50	2013-02-25	745	Colplu
Harpia	13	3, -50	2013-02-25	745	Forcol
Harpia	13	3, -50	2013-02-25	745	Ramtuc
Harpia	13	3, -50	2013-02-25	745	Thrcor
Harpia	13	3, -50	2013-02-25	800	Amafar
Harpia	13	3, -50	2013-02-25	800	Aramac
Harpia	13	3, -50	2013-02-25	800	Capnig
Harpia	13	3, -50	2013-02-25	800	Cercin
Harpia	13	3, -50	2013-02-25	800	Chipar
Harpia	13	3, -50	2013-02-25	800	Colplu
Harpia	13	3, -50	2013-02-25	800	Forcol
Harpia	13	3, -50	2013-02-25	800	Pipcor
Harpia	13	3, -50	2013-02-25	800	Psavir
Harpia	13	3, -50	2013-02-25	800	Ramtuc
Harpia	13	3, -50	2013-02-25	800	Ramvit
Harpia	13	3, -50	2013-02-25	800	Thrcor
Harpia	13	3, 800	2013-02-13	545	Abucum
Harpia	13	3, 800	2013-02-13	545	Barmar
Harpia	13	3, 800	2013-02-13	545	Cryvar
Harpia	13	3, 800	2013-02-13	545	Micgil
Harpia	13	3, 800	2013-02-13	545	Nycaet
Harpia	13	3, 800	2013-02-13	545	Nycgra
Harpia	13	3, 800	2013-02-13	545	Otuwat
Harpia	13	3, 800	2013-02-13	600	Arasev
Harpia	13	3, 800	2013-02-13	600	Atispa
Harpia	13	3, 800	2013-02-13	600	Barmar
Harpia	13	3, 800	2013-02-13	600	Buccap
Harpia	13	3, 800	2013-02-13	600	Chipar
Harpia	13	3, 800	2013-02-13	600	Glyspi
Harpia	13	3, 800	2013-02-13	600	Hylnae
Harpia	13	3, 800	2013-02-13	600	Hylpoe
Harpia	13	3, 800	2013-02-13	600	Myigai
Harpia	13	3, 800	2013-02-13	600	Myrfor
Harpia	13	3, 800	2013-02-13	600	Pacpol
Harpia	13	3, 800	2013-02-13	600	Pitgro
Harpia	13	3, 800	2013-02-13	600	Psavir
Harpia	13	3, 800	2013-02-13	600	Thaard
Harpia	13	3, 800	2013-02-13	600	Thamur
Harpia	13	3, 800	2013-02-13	600	Thrcor
Harpia	13	3, 800	2013-02-13	600	Troruf
Harpia	13	3, 800	2013-02-13	600	Unk
Harpia	13	3, 800	2013-02-13	600	Xipgut
Harpia	13	3, 800	2013-02-13	615	Atispa
Harpia	13	3, 800	2013-02-13	615	Barmar
Harpia	13	3, 800	2013-02-13	615	Brocya
Harpia	13	3, 800	2013-02-13	615	Camrub
Harpia	13	3, 800	2013-02-13	615	Camtur
Harpia	13	3, 800	2013-02-13	615	Capnig
Harpia	13	3, 800	2013-02-13	615	Chipar
Harpia	13	3, 800	2013-02-13	615	Geomon
Harpia	13	3, 800	2013-02-13	615	Henleu
Harpia	13	3, 800	2013-02-13	615	Hylpoe
Harpia	13	3, 800	2013-02-13	615	Myrfor
Harpia	13	3, 800	2013-02-13	615	Phonig
Harpia	13	3, 800	2013-02-13	615	Pitgro
Harpia	13	3, 800	2013-02-13	615	Psavir
Harpia	13	3, 800	2013-02-13	615	Thrcor
Harpia	13	3, 800	2013-02-13	615	Tinmaj
Harpia	13	3, 800	2013-02-13	615	Troruf
Harpia	13	3, 800	2013-02-13	615	Unk
Harpia	13	3, 800	2013-02-13	615	Unk
Harpia	13	3, 800	2013-02-13	615	Xipgut
Harpia	13	3, 800	2013-02-13	630	Atispa
Harpia	13	3, 800	2013-02-13	630	Brocya
Harpia	13	3, 800	2013-02-13	630	Camtur
Harpia	13	3, 800	2013-02-13	630	Capnig
Harpia	13	3, 800	2013-02-13	630	Cerser
Harpia	13	3, 800	2013-02-13	630	Chipar
Harpia	13	3, 800	2013-02-13	630	Colplu
Harpia	13	3, 800	2013-02-13	630	Cymlin
Harpia	13	3, 800	2013-02-13	630	Geomon
Harpia	13	3, 800	2013-02-13	630	Glyspi
Harpia	13	3, 800	2013-02-13	630	Hylhyp
Harpia	13	3, 800	2013-02-13	630	Hylpoe
Harpia	13	3, 800	2013-02-13	630	Myican
Harpia	13	3, 800	2013-02-13	630	Myigai
Harpia	13	3, 800	2013-02-13	630	Myrbra
Harpia	13	3, 800	2013-02-13	630	Pitgro
Harpia	13	3, 800	2013-02-13	630	Pygste
Harpia	13	3, 800	2013-02-13	630	Thaard
Harpia	13	3, 800	2013-02-13	630	Thamur
Harpia	13	3, 800	2013-02-13	630	Thrcor
Harpia	13	3, 800	2013-02-13	630	Titcay
Harpia	13	3, 800	2013-02-13	630	Tromel
Harpia	13	3, 800	2013-02-13	630	Unk
Harpia	13	3, 800	2013-02-13	630	Unk
Harpia	13	3, 800	2013-02-13	630	Unk
Harpia	13	3, 800	2013-02-13	630	Unk
Harpia	13	3, 800	2013-02-13	645	Amafar
Harpia	13	3, 800	2013-02-13	645	Atispa
Harpia	13	3, 800	2013-02-13	645	Brocya
Harpia	13	3, 800	2013-02-13	645	Capnig
Harpia	13	3, 800	2013-02-13	645	Cerser
Harpia	13	3, 800	2013-02-13	645	Chipar
Harpia	13	3, 800	2013-02-13	645	Colplu
Harpia	13	3, 800	2013-02-13	645	Geomon
Harpia	13	3, 800	2013-02-13	645	Glyspi
Harpia	13	3, 800	2013-02-13	645	Hylpoe
Harpia	13	3, 800	2013-02-13	645	Phiert
Harpia	13	3, 800	2013-02-13	645	Pitgro
Harpia	13	3, 800	2013-02-13	645	Pygste
Harpia	13	3, 800	2013-02-13	645	Thaard
Harpia	13	3, 800	2013-02-13	645	Thamur
Harpia	13	3, 800	2013-02-13	645	Thrcor
Harpia	13	3, 800	2013-02-13	645	Trovir
Harpia	13	3, 800	2013-02-13	645	Unk
Harpia	13	3, 800	2013-02-13	645	Unk
Harpia	13	3, 800	2013-02-13	700	Brocya
Harpia	13	3, 800	2013-02-13	700	Cammel
Harpia	13	3, 800	2013-02-13	700	Cammel
Harpia	13	3, 800	2013-02-13	700	Cerser
Harpia	13	3, 800	2013-02-13	700	Chipar
Harpia	13	3, 800	2013-02-13	700	Colplu
Harpia	13	3, 800	2013-02-13	700	Cymlin
Harpia	13	3, 800	2013-02-13	700	Cymlin
Harpia	13	3, 800	2013-02-13	700	Geomon
Harpia	13	3, 800	2013-02-13	700	Hylpoe
Harpia	13	3, 800	2013-02-13	700	Myrbra
Harpia	13	3, 800	2013-02-13	700	Psavir
Harpia	13	3, 800	2013-02-13	700	Pygste
Harpia	13	3, 800	2013-02-13	700	Thamur
Harpia	13	3, 800	2013-02-13	700	Thrcor
Harpia	13	3, 800	2013-02-13	700	Troruf
Harpia	13	3, 800	2013-02-13	700	Unk
Harpia	13	3, 800	2013-02-13	700	Unk
Harpia	13	3, 800	2013-02-13	700	Unk
Harpia	13	3, 800	2013-02-13	715	Barmar
Harpia	13	3, 800	2013-02-13	715	Cammel
Harpia	13	3, 800	2013-02-13	715	Cerser
Harpia	13	3, 800	2013-02-13	715	Chipar
Harpia	13	3, 800	2013-02-13	715	Colplu
Harpia	13	3, 800	2013-02-13	715	Geomon
Harpia	13	3, 800	2013-02-13	715	Glyspi
Harpia	13	3, 800	2013-02-13	715	Hylpoe
Harpia	13	3, 800	2013-02-13	715	Hypcan
Harpia	13	3, 800	2013-02-13	715	Myrbra
Harpia	13	3, 800	2013-02-13	715	Pygste
Harpia	13	3, 800	2013-02-13	715	Thrcor
Harpia	13	3, 800	2013-02-13	715	Troruf
Harpia	13	3, 800	2013-02-13	715	Trovir
Harpia	13	3, 800	2013-02-13	715	Turalb
Harpia	13	3, 800	2013-02-13	715	Unk
Harpia	13	3, 800	2013-02-13	715	Unk
Harpia	13	3, 800	2013-02-13	715	Unk
Harpia	13	3, 800	2013-02-13	730	Barmar
Harpia	13	3, 800	2013-02-13	730	Caccel
Harpia	13	3, 800	2013-02-13	730	Capnig
Harpia	13	3, 800	2013-02-13	730	Cerser
Harpia	13	3, 800	2013-02-13	730	Chipar
Harpia	13	3, 800	2013-02-13	730	Colplu
Harpia	13	3, 800	2013-02-13	730	Cryvar
Harpia	13	3, 800	2013-02-13	730	Glyspi
Harpia	13	3, 800	2013-02-13	730	Hylpoe
Harpia	13	3, 800	2013-02-13	730	Myrbra
Harpia	13	3, 800	2013-02-13	730	Piomen
Harpia	13	3, 800	2013-02-13	730	Pipcor
Harpia	13	3, 800	2013-02-13	730	Rammel
Harpia	13	3, 800	2013-02-13	730	Schleu
Harpia	13	3, 800	2013-02-13	730	Thamur
Harpia	13	3, 800	2013-02-13	730	Thasch
Harpia	13	3, 800	2013-02-13	730	Thrcor
Harpia	13	3, 800	2013-02-13	730	Titcay
Harpia	13	3, 800	2013-02-13	730	Tolass
Harpia	13	3, 800	2013-02-13	730	Troruf
Harpia	13	3, 800	2013-02-13	730	Xipgut
Harpia	13	3, 800	2013-02-13	745	Barmar
Harpia	13	3, 800	2013-02-13	745	Brocya
Harpia	13	3, 800	2013-02-13	745	Capnig
Harpia	13	3, 800	2013-02-13	745	Colplu
Harpia	13	3, 800	2013-02-13	745	Dapame
Harpia	13	3, 800	2013-02-13	745	Geomon
Harpia	13	3, 800	2013-02-13	745	Liotho
Harpia	13	3, 800	2013-02-13	745	Pipcor
Harpia	13	3, 800	2013-02-13	745	Rammel
Harpia	13	3, 800	2013-02-13	745	Schleu
Harpia	13	3, 800	2013-02-13	745	Thasch
Harpia	13	3, 800	2013-02-13	745	Thrcor
Harpia	13	3, 800	2013-02-13	745	Tolass
Harpia	13	3, 800	2013-02-13	745	Unk
Harpia	13	3, 800	2013-02-13	745	Xipgut
Harpia	13	3, 800	2013-02-13	800	Brocya
Harpia	13	3, 800	2013-02-13	800	Chipar
Harpia	13	3, 800	2013-02-13	800	Colplu
Harpia	13	3, 800	2013-02-13	800	Dapame
Harpia	13	3, 800	2013-02-13	800	Glyspi
Harpia	13	3, 800	2013-02-13	800	Glyspi
Harpia	13	3, 800	2013-02-13	800	Liotho
Harpia	13	3, 800	2013-02-13	800	Myrbra
Harpia	13	3, 800	2013-02-13	800	Myrbra
Harpia	13	3, 800	2013-02-13	800	Pipcor
Harpia	13	3, 800	2013-02-13	800	Psayur
Harpia	13	3, 800	2013-02-13	800	Ramtuc
Harpia	13	3, 800	2013-02-13	800	Schleu
Harpia	13	3, 800	2013-02-13	800	Thamur
Harpia	13	3, 800	2013-02-13	800	Thrcor
Harpia	13	3, 800	2013-02-13	800	Tolass
Harpia	13	3, 800	2013-02-13	800	Tolass
Harpia	13	3, 800	2013-02-13	800	Unk
Harpia	13	4, 200	2013-02-17	545	Barmar
Harpia	13	4, 200	2013-02-17	600	Cryvar
Harpia	13	4, 200	2013-02-17	600	Hylpoe
Harpia	13	4, 200	2013-02-17	600	Liotho
Harpia	13	4, 200	2013-02-17	600	Myrfor
Harpia	13	4, 200	2013-02-17	600	Thamur
Harpia	13	4, 200	2013-02-17	600	Tyrsto
Harpia	13	4, 200	2013-02-17	600	Unk
Harpia	13	4, 200	2013-02-17	615	Capnig
Harpia	13	4, 200	2013-02-17	615	Cryvar
Harpia	13	4, 200	2013-02-17	615	Liotho
Harpia	13	4, 200	2013-02-17	615	Micgil
Harpia	13	4, 200	2013-02-17	615	Myrfor
Harpia	13	4, 200	2013-02-17	615	Myrmyo
Harpia	13	4, 200	2013-02-17	615	Thamur
Harpia	13	4, 200	2013-02-17	615	Tyrsto
Harpia	13	4, 200	2013-02-17	615	Unk
Harpia	13	4, 200	2013-02-17	630	Brocya
Harpia	13	4, 200	2013-02-17	630	Capnig
Harpia	13	4, 200	2013-02-17	630	Capnig
Harpia	13	4, 200	2013-02-17	630	Colplu
Harpia	13	4, 200	2013-02-17	630	Glyspi
Harpia	13	4, 200	2013-02-17	630	Hypcan
Harpia	13	4, 200	2013-02-17	630	Liotho
Harpia	13	4, 200	2013-02-17	630	Lipvoc
Harpia	13	4, 200	2013-02-17	630	Myrfor
Harpia	13	4, 200	2013-02-17	630	Myrmyo
Harpia	13	4, 200	2013-02-17	630	Quepur
Harpia	13	4, 200	2013-02-17	630	Thamur
Harpia	13	4, 200	2013-02-17	630	Tyrsto
Harpia	13	4, 200	2013-02-17	630	Xipgut
Harpia	13	4, 200	2013-02-17	645	Colplu
Harpia	13	4, 200	2013-02-17	645	Liotho
Harpia	13	4, 200	2013-02-17	645	Myrfor
Harpia	13	4, 200	2013-02-17	645	Myrmyo
Harpia	13	4, 200	2013-02-17	645	Odoguj
Harpia	13	4, 200	2013-02-17	645	Phonig
Harpia	13	4, 200	2013-02-17	645	Quepur
Harpia	13	4, 200	2013-02-17	645	Tyrsto
Harpia	13	4, 200	2013-02-17	645	Unk
Harpia	13	4, 200	2013-02-17	645	Xipgut
Harpia	13	4, 200	2013-02-17	700	Barmar
Harpia	13	4, 200	2013-02-17	700	Capnig
Harpia	13	4, 200	2013-02-17	700	Celgra
Harpia	13	4, 200	2013-02-17	700	Cryvar
Harpia	13	4, 200	2013-02-17	700	Myrmyo
Harpia	13	4, 200	2013-02-17	700	Psavir
Harpia	13	4, 200	2013-02-17	700	Quepur
Harpia	13	4, 200	2013-02-17	700	Ramtuc
Harpia	13	4, 200	2013-02-17	700	Ramvit
Harpia	13	4, 200	2013-02-17	700	Tyrsto
Harpia	13	4, 200	2013-02-17	700	Xipgut
Harpia	13	4, 200	2013-02-17	715	Myrmyo
Harpia	13	4, 200	2013-02-17	715	Quepur
Harpia	13	4, 200	2013-02-17	715	Ramtuc
Harpia	13	4, 200	2013-02-17	715	Tyrsto
Harpia	13	4, 200	2013-02-17	715	Xipgut
Harpia	13	4, 200	2013-02-17	730	Aramac
Harpia	13	4, 200	2013-02-17	730	Quepur
Harpia	13	4, 200	2013-02-17	730	Tolass
Harpia	13	4, 200	2013-02-17	730	Tyrsto
Harpia	13	4, 200	2013-02-17	745	Colplu
Harpia	13	4, 200	2013-02-17	745	Cryvar
Harpia	13	4, 200	2013-02-17	745	Myrcam
Harpia	13	4, 200	2013-02-17	745	Myrfor
Harpia	13	4, 200	2013-02-17	745	Tyrsto
Harpia	13	4, 200	2013-02-17	745	Unk
Harpia	13	4, 200	2013-02-17	745	Unk
Harpia	13	4, 200	2013-02-17	745	Xipgut
Harpia	13	4, 200	2013-02-17	800	Colplu
Harpia	13	4, 200	2013-02-17	800	Micmar
Harpia	13	4, 200	2013-02-17	800	Psavir
Harpia	13	4, 200	2013-02-17	800	Thamur
Harpia	13	4, 200	2013-02-17	800	Troruf
Harpia	13	4, 200	2013-02-17	800	Tyrsto
Harpia	13	4, 200	2013-02-17	800	Unk
Harpia	13	4, 600	2013-02-12	545	Buccap
Harpia	13	4, 600	2013-02-12	545	Micbuc
Harpia	13	4, 600	2013-02-12	545	Micgil
Harpia	13	4, 600	2013-02-12	545	Micruf
Harpia	13	4, 600	2013-02-12	545	Nycaet
Harpia	13	4, 600	2013-02-12	545	Otuwat
Harpia	13	4, 600	2013-02-12	545	Turalb
Harpia	13	4, 600	2013-02-12	545	Turlaw
Harpia	13	4, 600	2013-02-12	545	Xipgut
Harpia	13	4, 600	2013-02-12	600	Atispa
Harpia	13	4, 600	2013-02-12	600	Buccap
Harpia	13	4, 600	2013-02-12	600	Colplu
Harpia	13	4, 600	2013-02-12	600	Cryvar
Harpia	13	4, 600	2013-02-12	600	Elepla
Harpia	13	4, 600	2013-02-12	600	Geomon
Harpia	13	4, 600	2013-02-12	600	Glyspi
Harpia	13	4, 600	2013-02-12	600	Hylpoe
Harpia	13	4, 600	2013-02-12	600	Liotho
Harpia	13	4, 600	2013-02-12	600	Myraxi
Harpia	13	4, 600	2013-02-12	600	Myrcam
Harpia	13	4, 600	2013-02-12	600	Otuwat
Harpia	13	4, 600	2013-02-12	600	Ramtuc
Harpia	13	4, 600	2013-02-12	600	Thamur
Harpia	13	4, 600	2013-02-12	600	Thasch
Harpia	13	4, 600	2013-02-12	600	Tolass
Harpia	13	4, 600	2013-02-12	600	Unk
Harpia	13	4, 600	2013-02-12	600	Xipgut
Harpia	13	4, 600	2013-02-12	615	Atispa
Harpia	13	4, 600	2013-02-12	615	Buccap
Harpia	13	4, 600	2013-02-12	615	Capnig
Harpia	13	4, 600	2013-02-12	615	Cryvar
Harpia	13	4, 600	2013-02-12	615	Geomon
Harpia	13	4, 600	2013-02-12	615	Glyspi
Harpia	13	4, 600	2013-02-12	615	Hylhyp
Harpia	13	4, 600	2013-02-12	615	Hyloch
Harpia	13	4, 600	2013-02-12	615	Liotho
Harpia	13	4, 600	2013-02-12	615	Myrbra
Harpia	13	4, 600	2013-02-12	615	Myrcam
Harpia	13	4, 600	2013-02-12	615	Myrfor
Harpia	13	4, 600	2013-02-12	615	Psavir
Harpia	13	4, 600	2013-02-12	615	Ramtuc
Harpia	13	4, 600	2013-02-12	615	Thacae
Harpia	13	4, 600	2013-02-12	615	Tolass
Harpia	13	4, 600	2013-02-12	615	Trovir
Harpia	13	4, 600	2013-02-12	615	Turalb
Harpia	13	4, 600	2013-02-12	615	Xipgut
Harpia	13	4, 600	2013-02-12	630	Atispa
Harpia	13	4, 600	2013-02-12	630	Autinf
Harpia	13	4, 600	2013-02-12	630	Buccap
Harpia	13	4, 600	2013-02-12	630	Capnig
Harpia	13	4, 600	2013-02-12	630	Cercin
Harpia	13	4, 600	2013-02-12	630	Colplu
Harpia	13	4, 600	2013-02-12	630	Galalb
Harpia	13	4, 600	2013-02-12	630	Geomon
Harpia	13	4, 600	2013-02-12	630	Glyspi
Harpia	13	4, 600	2013-02-12	630	Hylhyp
Harpia	13	4, 600	2013-02-12	630	Hyloch
Harpia	13	4, 600	2013-02-12	630	Hypcan
Harpia	13	4, 600	2013-02-12	630	Liotho
Harpia	13	4, 600	2013-02-12	630	Myraxi
Harpia	13	4, 600	2013-02-12	630	Myrcam
Harpia	13	4, 600	2013-02-12	630	Myrfor
Harpia	13	4, 600	2013-02-12	630	Myrmyo
Harpia	13	4, 600	2013-02-12	630	Piomel
Harpia	13	4, 600	2013-02-12	630	Piomen
Harpia	13	4, 600	2013-02-12	630	Thacae
Harpia	13	4, 600	2013-02-12	630	Thasch
Harpia	13	4, 600	2013-02-12	630	Tolass
Harpia	13	4, 600	2013-02-12	630	Xipgut
Harpia	13	4, 600	2013-02-12	645	Amafar
Harpia	13	4, 600	2013-02-12	645	Colplu
Harpia	13	4, 600	2013-02-12	645	Geomon
Harpia	13	4, 600	2013-02-12	645	Hyloch
Harpia	13	4, 600	2013-02-12	645	Hylsub
Harpia	13	4, 600	2013-02-12	645	Hyphyp
Harpia	13	4, 600	2013-02-12	645	Liotho
Harpia	13	4, 600	2013-02-12	645	Myrbra
Harpia	13	4, 600	2013-02-12	645	Myrlon
Harpia	13	4, 600	2013-02-12	645	Thacae
Harpia	13	4, 600	2013-02-12	645	Thamur
Harpia	13	4, 600	2013-02-12	645	Unk
Harpia	13	4, 600	2013-02-12	645	Xipgut
Harpia	13	4, 600	2013-02-12	700	Buccap
Harpia	13	4, 600	2013-02-12	700	Capnig
Harpia	13	4, 600	2013-02-12	700	Celgra
Harpia	13	4, 600	2013-02-12	700	Cercin
Harpia	13	4, 600	2013-02-12	700	Colplu
Harpia	13	4, 600	2013-02-12	700	Crycin
Harpia	13	4, 600	2013-02-12	700	Eubric
Harpia	13	4, 600	2013-02-12	700	Geomon
Harpia	13	4, 600	2013-02-12	700	Glyspi
Harpia	13	4, 600	2013-02-12	700	Henleu
Harpia	13	4, 600	2013-02-12	700	Hyloch
Harpia	13	4, 600	2013-02-12	700	Hyphyp
Harpia	13	4, 600	2013-02-12	700	Liotho
Harpia	13	4, 600	2013-02-12	700	Pitgro
Harpia	13	4, 600	2013-02-12	700	Thaard
Harpia	13	4, 600	2013-02-12	700	Thacae
Harpia	13	4, 600	2013-02-12	700	Troruf
Harpia	13	4, 600	2013-02-12	700	Unk
Harpia	13	4, 600	2013-02-12	700	Xipgut
Harpia	13	4, 600	2013-02-12	715	Brocya
Harpia	13	4, 600	2013-02-12	715	Dencer
Harpia	13	4, 600	2013-02-12	715	Glyspi
Harpia	13	4, 600	2013-02-12	715	Hyloch
Harpia	13	4, 600	2013-02-12	715	Hylsub
Harpia	13	4, 600	2013-02-12	715	Liotho
Harpia	13	4, 600	2013-02-12	715	Myrhau
Harpia	13	4, 600	2013-02-12	715	Myrlon
Harpia	13	4, 600	2013-02-12	715	Thacae
Harpia	13	4, 600	2013-02-12	715	Unk
Harpia	13	4, 600	2013-02-12	715	Unk
Harpia	13	4, 600	2013-02-12	715	Xipgut
Harpia	13	4, 600	2013-02-12	730	Amafar
Harpia	13	4, 600	2013-02-12	730	Cercin
Harpia	13	4, 600	2013-02-12	730	Colplu
Harpia	13	4, 600	2013-02-12	730	Hyloch
Harpia	13	4, 600	2013-02-12	730	Hylsub
Harpia	13	4, 600	2013-02-12	730	Hyphyp
Harpia	13	4, 600	2013-02-12	730	Liotho
Harpia	13	4, 600	2013-02-12	730	Myrlon
Harpia	13	4, 600	2013-02-12	730	Thaard
Harpia	13	4, 600	2013-02-12	730	Thacae
Harpia	13	4, 600	2013-02-12	745	Capnig
Harpia	13	4, 600	2013-02-12	745	Cercin
Harpia	13	4, 600	2013-02-12	745	Colplu
Harpia	13	4, 600	2013-02-12	745	Crycin
Harpia	13	4, 600	2013-02-12	745	Cyavio
Harpia	13	4, 600	2013-02-12	745	Henleu
Harpia	13	4, 600	2013-02-12	745	Hyloch
Harpia	13	4, 600	2013-02-12	745	Hyphyp
Harpia	13	4, 600	2013-02-12	745	Liotho
Harpia	13	4, 600	2013-02-12	745	Naslon
Harpia	13	4, 600	2013-02-12	745	Psavir
Harpia	13	4, 600	2013-02-12	745	Ramtuc
Harpia	13	4, 600	2013-02-12	745	Thacae
Harpia	13	4, 600	2013-02-12	745	Thamur
Harpia	13	4, 600	2013-02-12	745	Unk
Harpia	13	4, 600	2013-02-12	800	Brocya
Harpia	13	4, 600	2013-02-12	800	Capnig
Harpia	13	4, 600	2013-02-12	800	Cercin
Harpia	13	4, 600	2013-02-12	800	Colplu
Harpia	13	4, 600	2013-02-12	800	Hyloch
Harpia	13	4, 600	2013-02-12	800	Hyphyp
Harpia	13	4, 600	2013-02-12	800	Liotho
Harpia	13	4, 600	2013-02-12	800	Piomel
Harpia	13	4, 600	2013-02-12	800	Ramtuc
Harpia	13	4, 600	2013-02-12	800	Thamur
Harpia	13	4, 600	2013-02-12	800	Tinmaj
Harpia	13	4, 600	2013-02-12	800	Turlaw
Harpia	13	4, 600	2013-02-12	800	Xipgut
Harpia	13	5, 400	2013-02-08	545	Buccap
Harpia	13	5, 400	2013-02-08	545	Crysou
Harpia	13	5, 400	2013-02-08	545	Lopcri
Harpia	13	5, 400	2013-02-08	545	Micgil
Harpia	13	5, 400	2013-02-08	545	Nonbru
Harpia	13	5, 400	2013-02-08	545	Nycgri
Harpia	13	5, 400	2013-02-08	545	Nycoce
Harpia	13	5, 400	2013-02-08	600	Buccap
Harpia	13	5, 400	2013-02-08	600	Capnig
Harpia	13	5, 400	2013-02-08	600	Cercin
Harpia	13	5, 400	2013-02-08	600	Elepla
Harpia	13	5, 400	2013-02-08	600	Freund
Harpia	13	5, 400	2013-02-08	600	Glyspi
Harpia	13	5, 400	2013-02-08	600	Hylpoe
Harpia	13	5, 400	2013-02-08	600	Micgil
Harpia	13	5, 400	2013-02-08	600	Myraxi
Harpia	13	5, 400	2013-02-08	600	Myrcam
Harpia	13	5, 400	2013-02-08	600	Myrmen
Harpia	13	5, 400	2013-02-08	600	Nonbru
Harpia	13	5, 400	2013-02-08	600	Pitgro
Harpia	13	5, 400	2013-02-08	600	Thaard
Harpia	13	5, 400	2013-02-08	600	Thasch
Harpia	13	5, 400	2013-02-08	600	Tolass
Harpia	13	5, 400	2013-02-08	600	Unk
Harpia	13	5, 400	2013-02-08	615	Capnig
Harpia	13	5, 400	2013-02-08	615	Cercin
Harpia	13	5, 400	2013-02-08	615	Freund
Harpia	13	5, 400	2013-02-08	615	Geomon
Harpia	13	5, 400	2013-02-08	615	Glyspi
Harpia	13	5, 400	2013-02-08	615	Lipvoc
Harpia	13	5, 400	2013-02-08	615	Lopvit
Harpia	13	5, 400	2013-02-08	615	Myraxi
Harpia	13	5, 400	2013-02-08	615	Myrcam
Harpia	13	5, 400	2013-02-08	615	Myrlon
Harpia	13	5, 400	2013-02-08	615	Myrmen
Harpia	13	5, 400	2013-02-08	615	Thaard
Harpia	13	5, 400	2013-02-08	615	Thacae
Harpia	13	5, 400	2013-02-08	615	Thasch
Harpia	13	5, 400	2013-02-08	615	Tolass
Harpia	13	5, 400	2013-02-08	615	Xipgut
Harpia	13	5, 400	2013-02-08	630	Amafar
Harpia	13	5, 400	2013-02-08	630	Capnig
Harpia	13	5, 400	2013-02-08	630	Celgra
Harpia	13	5, 400	2013-02-08	630	Cercin
Harpia	13	5, 400	2013-02-08	630	Cymlin
Harpia	13	5, 400	2013-02-08	630	Freund
Harpia	13	5, 400	2013-02-08	630	Geomon
Harpia	13	5, 400	2013-02-08	630	Glyspi
Harpia	13	5, 400	2013-02-08	630	Henleu
Harpia	13	5, 400	2013-02-08	630	Lipvoc
Harpia	13	5, 400	2013-02-08	630	Lopvit
Harpia	13	5, 400	2013-02-08	630	Myrcam
Harpia	13	5, 400	2013-02-08	630	Myrmen
Harpia	13	5, 400	2013-02-08	630	Psavir
Harpia	13	5, 400	2013-02-08	630	Ramtuc
Harpia	13	5, 400	2013-02-08	630	Thaard
Harpia	13	5, 400	2013-02-08	630	Thasch
Harpia	13	5, 400	2013-02-08	630	Troruf
Harpia	13	5, 400	2013-02-08	630	Tyrsto
Harpia	13	5, 400	2013-02-08	630	Unk
Harpia	13	5, 400	2013-02-08	630	Xipgut
Harpia	13	5, 400	2013-02-08	645	Amafar
Harpia	13	5, 400	2013-02-08	645	Capnig
Harpia	13	5, 400	2013-02-08	645	Celgra
Harpia	13	5, 400	2013-02-08	645	Cercin
Harpia	13	5, 400	2013-02-08	645	Colplu
Harpia	13	5, 400	2013-02-08	645	Crysou
Harpia	13	5, 400	2013-02-08	645	Cryvar
Harpia	13	5, 400	2013-02-08	645	Glyspi
Harpia	13	5, 400	2013-02-08	645	Hypcan
Harpia	13	5, 400	2013-02-08	645	Lipvoc
Harpia	13	5, 400	2013-02-08	645	Myrcam
Harpia	13	5, 400	2013-02-08	645	Myrmyo
Harpia	13	5, 400	2013-02-08	645	Psavir
Harpia	13	5, 400	2013-02-08	645	Ramtuc
Harpia	13	5, 400	2013-02-08	645	Thaard
Harpia	13	5, 400	2013-02-08	645	Thasch
Harpia	13	5, 400	2013-02-08	645	Tyrsto
Harpia	13	5, 400	2013-02-08	700	Amafar
Harpia	13	5, 400	2013-02-08	700	Capnig
Harpia	13	5, 400	2013-02-08	700	Cercin
Harpia	13	5, 400	2013-02-08	700	Chipar
Harpia	13	5, 400	2013-02-08	700	Glyspi
Harpia	13	5, 400	2013-02-08	700	Hylhyp
Harpia	13	5, 400	2013-02-08	700	Lipvoc
Harpia	13	5, 400	2013-02-08	700	Lopvit
Harpia	13	5, 400	2013-02-08	700	Micmar
Harpia	13	5, 400	2013-02-08	700	Myrcam
Harpia	13	5, 400	2013-02-08	700	Myrlon
Harpia	13	5, 400	2013-02-08	700	Myrmyo
Harpia	13	5, 400	2013-02-08	700	Piomen
Harpia	13	5, 400	2013-02-08	700	Rammel
Harpia	13	5, 400	2013-02-08	700	Ramtuc
Harpia	13	5, 400	2013-02-08	700	Thasch
Harpia	13	5, 400	2013-02-08	700	Tyrsto
Harpia	13	5, 400	2013-02-08	715	Amafar
Harpia	13	5, 400	2013-02-08	715	Brocya
Harpia	13	5, 400	2013-02-08	715	Capnig
Harpia	13	5, 400	2013-02-08	715	Cercin
Harpia	13	5, 400	2013-02-08	715	Colplu
Harpia	13	5, 400	2013-02-08	715	Liotho
Harpia	13	5, 400	2013-02-08	715	Lipvoc
Harpia	13	5, 400	2013-02-08	715	Lopvit
Harpia	13	5, 400	2013-02-08	715	Myrbra
Harpia	13	5, 400	2013-02-08	715	Myrlon
Harpia	13	5, 400	2013-02-08	715	Myrmyo
Harpia	13	5, 400	2013-02-08	715	Psavir
Harpia	13	5, 400	2013-02-08	715	Rammel
Harpia	13	5, 400	2013-02-08	715	Sclcau
Harpia	13	5, 400	2013-02-08	715	Thamur
Harpia	13	5, 400	2013-02-08	715	Thasch
Harpia	13	5, 400	2013-02-08	715	Tromel
Harpia	13	5, 400	2013-02-08	715	Tyrsto
Harpia	13	5, 400	2013-02-08	730	Amafar
Harpia	13	5, 400	2013-02-08	730	Capnig
Harpia	13	5, 400	2013-02-08	730	Cercin
Harpia	13	5, 400	2013-02-08	730	Colplu
Harpia	13	5, 400	2013-02-08	730	Hylnae
Harpia	13	5, 400	2013-02-08	730	Liotho
Harpia	13	5, 400	2013-02-08	730	Lopvit
Harpia	13	5, 400	2013-02-08	730	Micgil
Harpia	13	5, 400	2013-02-08	730	Myrcam
Harpia	13	5, 400	2013-02-08	730	Myrmyo
Harpia	13	5, 400	2013-02-08	730	Rammel
Harpia	13	5, 400	2013-02-08	730	Ramtuc
Harpia	13	5, 400	2013-02-08	730	Thaard
Harpia	13	5, 400	2013-02-08	730	Thamur
Harpia	13	5, 400	2013-02-08	730	Thasch
Harpia	13	5, 400	2013-02-08	730	Tyrsto
Harpia	13	5, 400	2013-02-08	745	Amafar
Harpia	13	5, 400	2013-02-08	745	Caccel
Harpia	13	5, 400	2013-02-08	745	Cammel
Harpia	13	5, 400	2013-02-08	745	Capnig
Harpia	13	5, 400	2013-02-08	745	Cercin
Harpia	13	5, 400	2013-02-08	745	Colplu
Harpia	13	5, 400	2013-02-08	745	Cyavio
Harpia	13	5, 400	2013-02-08	745	Lipvoc
Harpia	13	5, 400	2013-02-08	745	Monmor
Harpia	13	5, 400	2013-02-08	745	Myrbra
Harpia	13	5, 400	2013-02-08	745	Myrcam
Harpia	13	5, 400	2013-02-08	745	Myrmyo
Harpia	13	5, 400	2013-02-08	745	Psavir
Harpia	13	5, 400	2013-02-08	745	Rammel
Harpia	13	5, 400	2013-02-08	745	Ramtuc
Harpia	13	5, 400	2013-02-08	745	Thasch
Harpia	13	5, 400	2013-02-08	745	Tyrsto
Harpia	13	5, 400	2013-02-08	745	Xipgut
Harpia	13	5, 400	2013-02-08	800	Amafar
Harpia	13	5, 400	2013-02-08	800	Brocya
Harpia	13	5, 400	2013-02-08	800	Buccap
Harpia	13	5, 400	2013-02-08	800	Capnig
Harpia	13	5, 400	2013-02-08	800	Cercin
Harpia	13	5, 400	2013-02-08	800	Colplu
Harpia	13	5, 400	2013-02-08	800	Lipvoc
Harpia	13	5, 400	2013-02-08	800	Myrbra
Harpia	13	5, 400	2013-02-08	800	Myrcam
Harpia	13	5, 400	2013-02-08	800	Myrhau
Harpia	13	5, 400	2013-02-08	800	Myrlon
Harpia	13	5, 400	2013-02-08	800	Myrmen
Harpia	13	5, 400	2013-02-08	800	Myrmyo
Harpia	13	5, 400	2013-02-08	800	Piomel
Harpia	13	5, 400	2013-02-08	800	Psavir
Harpia	13	5, 400	2013-02-08	800	Rammel
Harpia	13	5, 400	2013-02-08	800	Thacae
Harpia	13	5, 400	2013-02-08	800	Thasch
Harpia	13	5, 400	2013-02-08	800	Trovir
Harpia	13	5, 400	2013-02-08	800	Unk
Harpia	13	5, -50	2013-02-25	545	Cichuh
Harpia	13	5, -50	2013-02-25	545	Nycgri
Harpia	13	5, -50	2013-02-25	545	Otuwat
Harpia	13	5, -50	2013-02-25	545	Psocre
Harpia	13	5, -50	2013-02-25	600	Barmar
Harpia	13	5, -50	2013-02-25	600	Dapame
Harpia	13	5, -50	2013-02-25	600	Hylpoe
Harpia	13	5, -50	2013-02-25	600	Liotho
Harpia	13	5, -50	2013-02-25	600	Myraxi
Harpia	13	5, -50	2013-02-25	600	Myrcam
Harpia	13	5, -50	2013-02-25	600	Myrfor
Harpia	13	5, -50	2013-02-25	600	Nonbru
Harpia	13	5, -50	2013-02-25	600	Pacpol
Harpia	13	5, -50	2013-02-25	600	Psocre
Harpia	13	5, -50	2013-02-25	600	Pygste
Harpia	13	5, -50	2013-02-25	600	Unk
Harpia	13	5, -50	2013-02-25	600	Unk
Harpia	13	5, -50	2013-02-25	600	Xipgut
Harpia	13	5, -50	2013-02-25	615	Barmar
Harpia	13	5, -50	2013-02-25	615	Cryvar
Harpia	13	5, -50	2013-02-25	615	Gradig
Harpia	13	5, -50	2013-02-25	615	Hylpoe
Harpia	13	5, -50	2013-02-25	615	Hypcan
Harpia	13	5, -50	2013-02-25	615	Liotho
Harpia	13	5, -50	2013-02-25	615	Myraxi
Harpia	13	5, -50	2013-02-25	615	Myrcam
Harpia	13	5, -50	2013-02-25	615	Myrmen
Harpia	13	5, -50	2013-02-25	615	Ramtuc
Harpia	13	5, -50	2013-02-25	615	Thacae
Harpia	13	5, -50	2013-02-25	615	Thasch
Harpia	13	5, -50	2013-02-25	615	Trovir
Harpia	13	5, -50	2013-02-25	615	Unk
Harpia	13	5, -50	2013-02-25	615	Unk
Harpia	13	5, -50	2013-02-25	615	Xipgut
Harpia	13	5, -50	2013-02-27	630	Capnig
Harpia	13	5, -50	2013-02-25	630	Capnig
Harpia	13	5, -50	2013-02-27	630	Hylpoe
Harpia	13	5, -50	2013-02-25	630	Hylpoe
Harpia	13	5, -50	2013-02-25	630	Hypcan
Harpia	13	5, -50	2013-02-27	630	Liotho
Harpia	13	5, -50	2013-02-25	630	Liotho
Harpia	13	5, -50	2013-02-25	630	Micmar
Harpia	13	5, -50	2013-02-27	630	Myraxi
Harpia	13	5, -50	2013-02-25	630	Myraxi
Harpia	13	5, -50	2013-02-25	630	Myrcam
Harpia	13	5, -50	2013-02-25	630	Myrmen
Harpia	13	5, -50	2013-02-27	630	Quepur
Harpia	13	5, -50	2013-02-27	630	Ramtuc
Harpia	13	5, -50	2013-02-25	630	Ramtuc
Harpia	13	5, -50	2013-02-27	630	Thacae
Harpia	13	5, -50	2013-02-25	630	Thacae
Harpia	13	5, -50	2013-02-25	630	Troruf
Harpia	13	5, -50	2013-02-27	630	Unk
Harpia	13	5, -50	2013-02-27	630	Unk
Harpia	13	5, -50	2013-02-27	630	Unk
Harpia	13	5, -50	2013-02-27	630	Unk
Harpia	13	5, -50	2013-02-25	630	Unk
Harpia	13	5, -50	2013-02-25	630	Unk
Harpia	13	5, -50	2013-02-25	630	Xipgut
Harpia	13	5, -50	2013-02-25	645	Cammel
Harpia	13	5, -50	2013-02-25	645	Cercin
Harpia	13	5, -50	2013-02-25	645	Forcol
Harpia	13	5, -50	2013-02-25	645	Liotho
Harpia	13	5, -50	2013-02-25	645	Myrcam
Harpia	13	5, -50	2013-02-25	645	Myrmyo
Harpia	13	5, -50	2013-02-25	645	Nonbru
Harpia	13	5, -50	2013-02-25	645	Phiert
Harpia	13	5, -50	2013-02-25	645	Psavir
Harpia	13	5, -50	2013-02-25	645	Rammel
Harpia	13	5, -50	2013-02-25	645	Troruf
Harpia	13	5, -50	2013-02-25	700	Capnig
Harpia	13	5, -50	2013-02-25	700	Cercin
Harpia	13	5, -50	2013-02-25	700	Colplu
Harpia	13	5, -50	2013-02-25	700	Liotho
Harpia	13	5, -50	2013-02-25	700	Nonbru
Harpia	13	5, -50	2013-02-25	700	Rammel
Harpia	13	5, -50	2013-02-25	700	Troruf
Harpia	13	5, -50	2013-02-25	700	Trovir
Harpia	13	5, -50	2013-02-25	715	Cammel
Harpia	13	5, -50	2013-02-25	715	Capnig
Harpia	13	5, -50	2013-02-25	715	Colplu
Harpia	13	5, -50	2013-02-25	715	Liotho
Harpia	13	5, -50	2013-02-25	715	Nonbru
Harpia	13	5, -50	2013-02-25	715	Rammel
Harpia	13	5, -50	2013-02-25	715	Troruf
Harpia	13	5, -50	2013-02-25	715	Trovir
Harpia	13	5, -50	2013-02-25	715	Unk
Harpia	13	5, -50	2013-02-25	730	Cammel
Harpia	13	5, -50	2013-02-25	730	Colplu
Harpia	13	5, -50	2013-02-25	730	Myrcam
Harpia	13	5, -50	2013-02-25	730	Nonbru
Harpia	13	5, -50	2013-02-25	730	Piomen
Harpia	13	5, -50	2013-02-25	730	Ramtuc
Harpia	13	5, -50	2013-02-25	730	Trovir
Harpia	13	5, -50	2013-02-25	745	Aramac
Harpia	13	5, -50	2013-02-25	745	Capnig
Harpia	13	5, -50	2013-02-25	745	Colplu
Harpia	13	5, -50	2013-02-25	745	Lepruf
Harpia	13	5, -50	2013-02-25	745	Liotho
Harpia	13	5, -50	2013-02-25	745	Myrcam
Harpia	13	5, -50	2013-02-25	745	Ramtuc
Harpia	13	5, -50	2013-02-25	745	Unk
Harpia	13	5, -50	2013-02-25	800	Aramac
Harpia	13	5, -50	2013-02-25	800	Brocya
Harpia	13	5, -50	2013-02-25	800	Capnig
Harpia	13	5, -50	2013-02-25	800	Colplu
Harpia	13	5, -50	2013-02-25	800	Dapame
Harpia	13	5, -50	2013-02-25	800	Geomon
Harpia	13	5, -50	2013-02-25	800	Liotho
Harpia	13	5, -50	2013-02-25	800	Micmar
Harpia	13	5, -50	2013-02-25	800	Quepur
Harpia	13	5, -50	2013-02-25	800	Ramtuc
Harpia	13	5, -50	2013-02-25	800	Ramvit
Harpia	13	5, -50	2013-02-25	800	Unk
Harpia	13	5, 800	2013-02-13	545	Barmar
Harpia	13	5, 800	2013-02-13	545	Hylsub
Harpia	13	5, 800	2013-02-13	545	Micgil
Harpia	13	5, 800	2013-02-13	545	Nycoce
Harpia	13	5, 800	2013-02-13	545	Turlaw
Harpia	13	5, 800	2013-02-13	600	Autinf
Harpia	13	5, 800	2013-02-13	600	Geomon
Harpia	13	5, 800	2013-02-13	600	Hylsub
Harpia	13	5, 800	2013-02-13	600	Hypcan
Harpia	13	5, 800	2013-02-13	600	Malfus
Harpia	13	5, 800	2013-02-13	600	Myrcam
Harpia	13	5, 800	2013-02-13	600	Myrfor
Harpia	13	5, 800	2013-02-13	600	Psavir
Harpia	13	5, 800	2013-02-13	600	Rammel
Harpia	13	5, 800	2013-02-13	600	Thamur
Harpia	13	5, 800	2013-02-13	600	Turalb
Harpia	13	5, 800	2013-02-13	600	Unk
Harpia	13	5, 800	2013-02-13	600	Xipgut
Harpia	13	5, 800	2013-02-13	600	Xipgut
Harpia	13	5, 800	2013-02-13	615	Ancstr
Harpia	13	5, 800	2013-02-13	615	Autinf
Harpia	13	5, 800	2013-02-13	615	Cryvar
Harpia	13	5, 800	2013-02-13	615	Glyspi
Harpia	13	5, 800	2013-02-13	615	Hylsub
Harpia	13	5, 800	2013-02-13	615	Hypcan
Harpia	13	5, 800	2013-02-13	615	Myrcam
Harpia	13	5, 800	2013-02-13	615	Myrmen
Harpia	13	5, 800	2013-02-13	615	Myrmyo
Harpia	13	5, 800	2013-02-13	615	Piomen
Harpia	13	5, 800	2013-02-13	615	Pygste
Harpia	13	5, 800	2013-02-13	615	Thamur
Harpia	13	5, 800	2013-02-13	615	Thasch
Harpia	13	5, 800	2013-02-13	615	Turalb
Harpia	13	5, 800	2013-02-13	615	Xipgut
Harpia	13	5, 800	2013-02-13	630	Autinf
Harpia	13	5, 800	2013-02-13	630	Brocya
Harpia	13	5, 800	2013-02-13	630	Capnig
Harpia	13	5, 800	2013-02-13	630	Colplu
Harpia	13	5, 800	2013-02-13	630	Cryvar
Harpia	13	5, 800	2013-02-13	630	Glyspi
Harpia	13	5, 800	2013-02-13	630	Henleu
Harpia	13	5, 800	2013-02-13	630	Hylhyp
Harpia	13	5, 800	2013-02-13	630	Myrbra
Harpia	13	5, 800	2013-02-13	630	Myrcam
Harpia	13	5, 800	2013-02-13	630	Myrfor
Harpia	13	5, 800	2013-02-13	630	Piomen
Harpia	13	5, 800	2013-02-13	630	Pitgro
Harpia	13	5, 800	2013-02-13	630	Thamur
Harpia	13	5, 800	2013-02-13	630	Thrcor
Harpia	13	5, 800	2013-02-13	630	Turalb
Harpia	13	5, 800	2013-02-13	630	Unk
Harpia	13	5, 800	2013-02-13	645	Atispa
Harpia	13	5, 800	2013-02-13	645	Brocya
Harpia	13	5, 800	2013-02-13	645	Capnig
Harpia	13	5, 800	2013-02-13	645	Colplu
Harpia	13	5, 800	2013-02-13	645	Cryvar
Harpia	13	5, 800	2013-02-13	645	Forcol
Harpia	13	5, 800	2013-02-13	645	Glyspi
Harpia	13	5, 800	2013-02-13	645	Hylsub
Harpia	13	5, 800	2013-02-13	645	Myrbra
Harpia	13	5, 800	2013-02-13	645	Myrcam
Harpia	13	5, 800	2013-02-13	645	Myrfor
Harpia	13	5, 800	2013-02-13	645	Myrmyo
Harpia	13	5, 800	2013-02-13	645	Pitgro
Harpia	13	5, 800	2013-02-13	645	Thrcor
Harpia	13	5, 800	2013-02-13	645	Xipgut
Harpia	13	5, 800	2013-02-13	700	Brocya
Harpia	13	5, 800	2013-02-13	700	Caccel
Harpia	13	5, 800	2013-02-13	700	Colplu
Harpia	13	5, 800	2013-02-13	700	Cryvar
Harpia	13	5, 800	2013-02-13	700	Cyavio
Harpia	13	5, 800	2013-02-13	700	Geomon
Harpia	13	5, 800	2013-02-13	700	Glyspi
Harpia	13	5, 800	2013-02-13	700	Henleu
Harpia	13	5, 800	2013-02-13	700	Myrcam
Harpia	13	5, 800	2013-02-13	700	Myrfor
Harpia	13	5, 800	2013-02-13	700	Myrmyo
Harpia	13	5, 800	2013-02-13	700	Pitgro
Harpia	13	5, 800	2013-02-13	700	Psaang
Harpia	13	5, 800	2013-02-13	700	Ramtuc
Harpia	13	5, 800	2013-02-13	700	Thrcor
Harpia	13	5, 800	2013-02-13	715	Barmar
Harpia	13	5, 800	2013-02-13	715	Cammel
Harpia	13	5, 800	2013-02-13	715	Capnig
Harpia	13	5, 800	2013-02-13	715	Colplu
Harpia	13	5, 800	2013-02-13	715	Cryvar
Harpia	13	5, 800	2013-02-13	715	Glyspi
Harpia	13	5, 800	2013-02-13	715	Myrbra
Harpia	13	5, 800	2013-02-13	715	Myrcam
Harpia	13	5, 800	2013-02-13	715	Pitgro
Harpia	13	5, 800	2013-02-13	715	Thamur
Harpia	13	5, 800	2013-02-13	715	Tromel
Harpia	13	5, 800	2013-02-13	715	Turalb
Harpia	13	5, 800	2013-02-13	715	Xipgut
Harpia	13	5, 800	2013-02-13	730	Barmar
Harpia	13	5, 800	2013-02-13	730	Camtur
Harpia	13	5, 800	2013-02-13	730	Colplu
Harpia	13	5, 800	2013-02-13	730	Cryvar
Harpia	13	5, 800	2013-02-13	730	Freund
Harpia	13	5, 800	2013-02-13	730	Xipgut
Harpia	13	5, 800	2013-02-13	745	Capnig
Harpia	13	5, 800	2013-02-13	745	Colplu
Harpia	13	5, 800	2013-02-13	745	Dapame
Harpia	13	5, 800	2013-02-13	745	Myrcam
Harpia	13	5, 800	2013-02-13	745	Thamur
Harpia	13	5, 800	2013-02-13	745	Turlaw
Harpia	13	5, 800	2013-02-13	745	Xipgut
Harpia	13	5, 800	2013-02-13	800	Autinf
Harpia	13	5, 800	2013-02-13	800	Cammel
Harpia	13	5, 800	2013-02-13	800	Capnig
Harpia	13	5, 800	2013-02-13	800	Cercin
Harpia	13	5, 800	2013-02-13	800	Colplu
Harpia	13	5, 800	2013-02-13	800	Hylnae
Harpia	13	5, 800	2013-02-13	800	Myrbra
Harpia	13	5, 800	2013-02-13	800	Myrcam
Harpia	13	5, 800	2013-02-13	800	Phonig
Harpia	13	5, 800	2013-02-13	800	Piomen
Harpia	13	5, 800	2013-02-13	800	Pipcor
Harpia	13	5, 800	2013-02-13	800	Ramtuc
Harpia	13	5, 800	2013-02-13	800	Thamur
Harpia	13	5, 800	2013-02-13	800	Thrcor
Harpia	13	5, 800	2013-02-13	815	Rammel
Harpia	13	6, 200	2013-02-17	545
Harpia	13	6, 200	2013-02-17	600	Capnig
Harpia	13	6, 200	2013-02-17	600	Geomon
Harpia	13	6, 200	2013-02-17	600	Hylpoe
Harpia	13	6, 200	2013-02-17	600	Hylsub
Harpia	13	6, 200	2013-02-17	600	Thamur
Harpia	13	6, 200	2013-02-17	600	Unk
Harpia	13	6, 200	2013-02-17	615	Butmag
Harpia	13	6, 200	2013-02-17	615	Cercin
Harpia	13	6, 200	2013-02-17	615	Cryvar
Harpia	13	6, 200	2013-02-17	615	Geomon
Harpia	13	6, 200	2013-02-17	615	Glyspi
Harpia	13	6, 200	2013-02-17	615	Hylpoe
Harpia	13	6, 200	2013-02-17	615	Liotho
Harpia	13	6, 200	2013-02-17	615	Malfus
Harpia	13	6, 200	2013-02-17	615	Micmar
Harpia	13	6, 200	2013-02-17	615	Myraxi
Harpia	13	6, 200	2013-02-17	615	Myrmen
Harpia	13	6, 200	2013-02-17	615	Myrmyo
Harpia	13	6, 200	2013-02-17	615	Thamur
Harpia	13	6, 200	2013-02-17	615	Thasch
Harpia	13	6, 200	2013-02-17	615	Unk
Harpia	13	6, 200	2013-02-17	615	Unk
Harpia	13	6, 200	2013-02-17	615	Venaff
Harpia	13	6, 200	2013-02-17	615	Xipobs
Harpia	13	6, 200	2013-02-17	630	Capnig
Harpia	13	6, 200	2013-02-17	630	Celgra
Harpia	13	6, 200	2013-02-17	630	Cercin
Harpia	13	6, 200	2013-02-17	630	Colplu
Harpia	13	6, 200	2013-02-17	630	Hylpoe
Harpia	13	6, 200	2013-02-17	630	Liotho
Harpia	13	6, 200	2013-02-17	630	Liotho
Harpia	13	6, 200	2013-02-17	630	Lipvoc
Harpia	13	6, 200	2013-02-17	630	Myrmyo
Harpia	13	6, 200	2013-02-17	630	Selrei
Harpia	13	6, 200	2013-02-17	630	Unk
Harpia	13	6, 200	2013-02-17	630	Xipgut
Harpia	13	6, 200	2013-02-17	645	Capnig
Harpia	13	6, 200	2013-02-17	645	Cercin
Harpia	13	6, 200	2013-02-17	645	Colplu
Harpia	13	6, 200	2013-02-17	645	Colplu
Harpia	13	6, 200	2013-02-17	645	Hylnae
Harpia	13	6, 200	2013-02-17	645	Hylnae
Harpia	13	6, 200	2013-02-17	645	Hylpoe
Harpia	13	6, 200	2013-02-17	645	Liotho
Harpia	13	6, 200	2013-02-17	645	Lipvoc
Harpia	13	6, 200	2013-02-17	645	Malfus
[truncated: 1,278 more rows]

## Sheet: H2014
Plot	Year	Point	Date	Time	Species
Harpia	14	1, 400	2014-02-12	545	Nonbru
Harpia	14	1, 400	2014-02-12	545	Nycgri
Harpia	14	1, 400	2014-02-12	545	Nycoce
Harpia	14	1, 400	2014-02-12	600	Atispa
Harpia	14	1, 400	2014-02-12	600	Barmar
Harpia	14	1, 400	2014-02-12	600	Cercin
Harpia	14	1, 400	2014-02-12	600	Crysou
Harpia	14	1, 400	2014-02-12	600	Denruf
Harpia	14	1, 400	2014-02-12	600	Myrcam
Harpia	14	1, 400	2014-02-12	600	Myrmyo
Harpia	14	1, 400	2014-02-12	600	Nonbru
Harpia	14	1, 400	2014-02-12	600	Phiert
Harpia	14	1, 400	2014-02-12	600	Thamur
Harpia	14	1, 400	2014-02-12	600	Thasch
Harpia	14	1, 400	2014-02-12	600	Tinmaj
Harpia	14	1, 400	2014-02-12	600	unk
Harpia	14	1, 400	2014-02-12	600	Xipgut
Harpia	14	1, 400	2014-02-12	615	Barmar
Harpia	14	1, 400	2014-02-12	615	Cercin
Harpia	14	1, 400	2014-02-12	615	Cymlin
Harpia	14	1, 400	2014-02-12	615	Glyspi
Harpia	14	1, 400	2014-02-12	615	Myrcam
Harpia	14	1, 400	2014-02-12	615	Myrmyo
Harpia	14	1, 400	2014-02-12	615	Nonbru
Harpia	14	1, 400	2014-02-12	615	Phiert
Harpia	14	1, 400	2014-02-12	615	Pipcor
Harpia	14	1, 400	2014-02-12	615	Ramtuc
Harpia	14	1, 400	2014-02-12	615	Ramvit
Harpia	14	1, 400	2014-02-12	615	Thasch
Harpia	14	1, 400	2014-02-12	615	Tingut
Harpia	14	1, 400	2014-02-12	615	Tinmaj
Harpia	14	1, 400	2014-02-12	615	Xipgut
Harpia	14	1, 400	2014-02-12	630	Capnig
Harpia	14	1, 400	2014-02-12	630	Cercin
Harpia	14	1, 400	2014-02-12	630	Cymlin
Harpia	14	1, 400	2014-02-12	630	Geomon
Harpia	14	1, 400	2014-02-12	630	Glyspi
Harpia	14	1, 400	2014-02-12	630	Melcru
Harpia	14	1, 400	2014-02-12	630	Myrcam
Harpia	14	1, 400	2014-02-12	630	Myrfor
Harpia	14	1, 400	2014-02-12	630	Nonbru
Harpia	14	1, 400	2014-02-12	630	Nonbru
Harpia	14	1, 400	2014-02-12	630	Pipcor
Harpia	14	1, 400	2014-02-12	630	Thasch
Harpia	14	1, 400	2014-02-12	630	Tingut
Harpia	14	1, 400	2014-02-12	630	Tinmaj
Harpia	14	1, 400	2014-02-12	630	Trovir
Harpia	14	1, 400	2014-02-12	630	Xipgut
Harpia	14	1, 400	2014-02-12	645	Barmar
Harpia	14	1, 400	2014-02-12	645	Camtur
Harpia	14	1, 400	2014-02-12	645	Cymlin
Harpia	14	1, 400	2014-02-12	645	Geomon
Harpia	14	1, 400	2014-02-12	645	Myrcam
Harpia	14	1, 400	2014-02-12	645	Myrfor
Harpia	14	1, 400	2014-02-12	645	Myrmyo
Harpia	14	1, 400	2014-02-12	645	Nonbru
Harpia	14	1, 400	2014-02-12	645	Phiert
Harpia	14	1, 400	2014-02-12	645	Pipcor
Harpia	14	1, 400	2014-02-12	645	Ramtuc
Harpia	14	1, 400	2014-02-12	645	Tingut
Harpia	14	1, 400	2014-02-12	645	Trovir
Harpia	14	1, 400	2014-02-12	700	Barmar
Harpia	14	1, 400	2014-02-12	700	Cercin
Harpia	14	1, 400	2014-02-12	700	Cymlin
Harpia	14	1, 400	2014-02-12	700	Geomon
Harpia	14	1, 400	2014-02-12	700	Liotho
Harpia	14	1, 400	2014-02-12	700	Myrcam
Harpia	14	1, 400	2014-02-12	700	Myrmyo
Harpia	14	1, 400	2014-02-12	700	Phiert
Harpia	14	1, 400	2014-02-12	700	Pipcor
Harpia	14	1, 400	2014-02-12	700	Pygste
Harpia	14	1, 400	2014-02-12	700	Ramvit
Harpia	14	1, 400	2014-02-12	700	Tingut
Harpia	14	1, 400	2014-02-12	700	unk
Harpia	14	1, 400	2014-02-12	700	unk
Harpia	14	1, 400	2014-02-12	700	unk
Harpia	14	1, 400	2014-02-12	715	Amafar
Harpia	14	1, 400	2014-02-12	715	Barmar
Harpia	14	1, 400	2014-02-12	715	Cercin
Harpia	14	1, 400	2014-02-12	715	Cymlin
Harpia	14	1, 400	2014-02-12	715	Geomon
Harpia	14	1, 400	2014-02-12	715	Glyspi
Harpia	14	1, 400	2014-02-12	715	Liotho
Harpia	14	1, 400	2014-02-12	715	Myrcam
Harpia	14	1, 400	2014-02-12	715	Myrmyo
Harpia	14	1, 400	2014-02-12	715	Pipcor
Harpia	14	1, 400	2014-02-12	715	Thasch
Harpia	14	1, 400	2014-02-12	715	Tingut
Harpia	14	1, 400	2014-02-12	715	Tinmaj
Harpia	14	1, 400	2014-02-12	715	unk
Harpia	14	1, 400	2014-02-12	715	unk
Harpia	14	1, 400	2014-02-12	730	Barmar
Harpia	14	1, 400	2014-02-12	730	Cercin
Harpia	14	1, 400	2014-02-12	730	Cymlin
Harpia	14	1, 400	2014-02-12	730	Geomon
Harpia	14	1, 400	2014-02-12	730	Glyspi
Harpia	14	1, 400	2014-02-12	730	Lepruf
Harpia	14	1, 400	2014-02-12	730	Liotho
Harpia	14	1, 400	2014-02-12	730	Melcru
Harpia	14	1, 400	2014-02-12	730	Myrcam
Harpia	14	1, 400	2014-02-12	730	Myrmyo
Harpia	14	1, 400	2014-02-12	730	Pipcor
Harpia	14	1, 400	2014-02-12	730	unk
Harpia	14	1, 400	2014-02-12	730	unk
Harpia	14	1, 400	2014-02-12	745	Amafar
Harpia	14	1, 400	2014-02-12	745	Cercin
Harpia	14	1, 400	2014-02-12	745	Colplu
Harpia	14	1, 400	2014-02-12	745	Colsub
Harpia	14	1, 400	2014-02-12	745	Geomon
Harpia	14	1, 400	2014-02-12	745	Glyspi
Harpia	14	1, 400	2014-02-12	745	Lepruf
Harpia	14	1, 400	2014-02-12	745	Myrcam
Harpia	14	1, 400	2014-02-12	745	Myrmyo
Harpia	14	1, 400	2014-02-12	745	Pipcor
Harpia	14	1, 400	2014-02-12	745	Ramvit
Harpia	14	1, 400	2014-02-12	800	Brocya
Harpia	14	1, 400	2014-02-12	800	Cammel
Harpia	14	1, 400	2014-02-12	800	Celele
Harpia	14	1, 400	2014-02-12	800	Cercin
Harpia	14	1, 400	2014-02-12	800	Colplu
Harpia	14	1, 400	2014-02-12	800	Cyavio
Harpia	14	1, 400	2014-02-12	800	Geomon
Harpia	14	1, 400	2014-02-12	800	Lepruf
Harpia	14	1, 400	2014-02-12	800	Liotho
Harpia	14	1, 400	2014-02-12	800	Myrcam
Harpia	14	1, 400	2014-02-12	800	Myrmyo
Harpia	14	1, 400	2014-02-12	800	Pipcor
Harpia	14	1, 400	2014-02-12	800	Thrcor
Harpia	14	1, 400	2014-02-12	800	Turlaw
Harpia	14	1, 400	2014-02-12	800	Xipgut
Harpia	14	1, -50	2014-02-05	545	Abucum
Harpia	14	1, -50	2014-02-05	545	Buccap
Harpia	14	1, -50	2014-02-05	545	Micgil
Harpia	14	1, -50	2014-02-05	545	Mitsal
Harpia	14	1, -50	2014-02-05	545	Turlaw
Harpia	14	1, -50	2014-02-05	600	Aramac
Harpia	14	1, -50	2014-02-05	600	Cryvar
Harpia	14	1, -50	2014-02-05	600	Geomon
Harpia	14	1, -50	2014-02-05	600	Hylhyp
Harpia	14	1, -50	2014-02-05	600	Hylsub
Harpia	14	1, -50	2014-02-05	600	Myrfor
Harpia	14	1, -50	2014-02-05	600	Pitgro
Harpia	14	1, -50	2014-02-05	600	Pygste
Harpia	14	1, -50	2014-02-05	600	Thamur
Harpia	14	1, -50	2014-02-05	600	Turlaw
Harpia	14	1, -50	2014-02-05	600	Xipgut
Harpia	14	1, -50	2014-02-05	615	Chipar
Harpia	14	1, -50	2014-02-05	615	Cryvar
Harpia	14	1, -50	2014-02-05	615	Hylnae
Harpia	14	1, -50	2014-02-05	615	Hylsub
Harpia	14	1, -50	2014-02-05	615	Hyphyp
Harpia	14	1, -50	2014-02-05	615	Megmar
Harpia	14	1, -50	2014-02-05	615	Myrfor
Harpia	14	1, -50	2014-02-05	615	Myrmyo
Harpia	14	1, -50	2014-02-05	615	Pitgro
Harpia	14	1, -50	2014-02-05	615	Ramtuc
Harpia	14	1, -50	2014-02-05	615	Thamur
Harpia	14	1, -50	2014-02-05	615	Turlaw
Harpia	14	1, -50	2014-02-05	615	unk
Harpia	14	1, -50	2014-02-05	630	Abucum
Harpia	14	1, -50	2014-02-05	630	Aramac
Harpia	14	1, -50	2014-02-05	630	Barmar
Harpia	14	1, -50	2014-02-05	630	Capnig
Harpia	14	1, -50	2014-02-05	630	Chipar
Harpia	14	1, -50	2014-02-05	630	Cryvar
Harpia	14	1, -50	2014-02-05	630	Cymlin
Harpia	14	1, -50	2014-02-05	630	Glyspi
Harpia	14	1, -50	2014-02-05	630	Hylnae
Harpia	14	1, -50	2014-02-05	630	Hylpoe
Harpia	14	1, -50	2014-02-05	630	Hylsub
Harpia	14	1, -50	2014-02-05	630	Leusch
Harpia	14	1, -50	2014-02-05	630	Megmar
Harpia	14	1, -50	2014-02-05	630	Megmar
Harpia	14	1, -50	2014-02-05	630	Myrmyo
Harpia	14	1, -50	2014-02-05	630	Pitgro
Harpia	14	1, -50	2014-02-05	630	Ramtuc
Harpia	14	1, -50	2014-02-05	630	Sclmex
Harpia	14	1, -50	2014-02-05	630	Thaard
Harpia	14	1, -50	2014-02-05	630	Thamur
Harpia	14	1, -50	2014-02-05	630	Tingut
Harpia	14	1, -50	2014-02-05	630	Turlaw
Harpia	14	1, -50	2014-02-05	630	Unk
Harpia	14	1, -50	2014-02-05	630	Unk
Harpia	14	1, -50	2014-02-05	630	Unk
Harpia	14	1, -50	2014-02-05	630	Unkwp
Harpia	14	1, -50	2014-02-05	630	Xipgut
Harpia	14	1, -50	2014-02-05	645	Amafar
Harpia	14	1, -50	2014-02-05	645	Aramac
Harpia	14	1, -50	2014-02-05	645	Barmar
Harpia	14	1, -50	2014-02-05	645	Celele
Harpia	14	1, -50	2014-02-05	645	Cercin
Harpia	14	1, -50	2014-02-05	645	Colplu
Harpia	14	1, -50	2014-02-05	645	Cyavio
Harpia	14	1, -50	2014-02-05	645	Geomon
Harpia	14	1, -50	2014-02-05	645	Glyspi
Harpia	14	1, -50	2014-02-05	645	Henleu
Harpia	14	1, -50	2014-02-05	645	Hylhyp
Harpia	14	1, -50	2014-02-05	645	Hypcan
Harpia	14	1, -50	2014-02-05	645	Jacaur
Harpia	14	1, -50	2014-02-05	645	Megmar
Harpia	14	1, -50	2014-02-05	645	Myrmyo
Harpia	14	1, -50	2014-02-05	645	Pygste
Harpia	14	1, -50	2014-02-05	645	Quepur
Harpia	14	1, -50	2014-02-05	645	Ramtuc
Harpia	14	1, -50	2014-02-05	645	Sclmex
Harpia	14	1, -50	2014-02-05	645	Thamur
Harpia	14	1, -50	2014-02-05	645	Turlaw
Harpia	14	1, -50	2014-02-05	645	Unk
Harpia	14	1, -50	2014-02-05	645	Unk
Harpia	14	1, -50	2014-02-05	645	Xipgut
Harpia	14	1, -50	2014-02-05	700	Amafar
Harpia	14	1, -50	2014-02-05	700	Barmar
Harpia	14	1, -50	2014-02-05	700	Cammel
Harpia	14	1, -50	2014-02-05	700	Celele
Harpia	14	1, -50	2014-02-05	700	Cercin
Harpia	14	1, -50	2014-02-05	700	Chipar
Harpia	14	1, -50	2014-02-05	700	Colplu
Harpia	14	1, -50	2014-02-05	700	Glyspi
Harpia	14	1, -50	2014-02-05	700	Hylhyp
Harpia	14	1, -50	2014-02-05	700	Hylnae
Harpia	14	1, -50	2014-02-05	700	Jacaur
Harpia	14	1, -50	2014-02-05	700	Megmar
Harpia	14	1, -50	2014-02-05	700	Myigai
Harpia	14	1, -50	2014-02-05	700	Myrmyo
Harpia	14	1, -50	2014-02-05	700	Piomel
Harpia	14	1, -50	2014-02-05	700	Quepur
Harpia	14	1, -50	2014-02-05	700	Ramtuc
Harpia	14	1, -50	2014-02-05	700	Sclcau
Harpia	14	1, -50	2014-02-05	700	Selrei
Harpia	14	1, -50	2014-02-05	700	Thamur
Harpia	14	1, -50	2014-02-05	700	Turlaw
Harpia	14	1, -50	2014-02-05	700	Xipgut
Harpia	14	1, -50	2014-02-05	715	Amafar
Harpia	14	1, -50	2014-02-05	715	Cercin
Harpia	14	1, -50	2014-02-05	715	Chipar
Harpia	14	1, -50	2014-02-05	715	Colplu
Harpia	14	1, -50	2014-02-05	715	Cymlin
Harpia	14	1, -50	2014-02-05	715	Cymlin
Harpia	14	1, -50	2014-02-05	715	Geomon
Harpia	14	1, -50	2014-02-05	715	Hylhyp
Harpia	14	1, -50	2014-02-05	715	Hylnae
Harpia	14	1, -50	2014-02-05	715	Hypcan
Harpia	14	1, -50	2014-02-05	715	Jacaur
Harpia	14	1, -50	2014-02-05	715	Megmar
Harpia	14	1, -50	2014-02-05	715	Myrbra
Harpia	14	1, -50	2014-02-05	715	Phlery
Harpia	14	1, -50	2014-02-05	715	Piomel
Harpia	14	1, -50	2014-02-05	715	Pygste
Harpia	14	1, -50	2014-02-05	715	Ramtuc
Harpia	14	1, -50	2014-02-05	715	Ramvit
Harpia	14	1, -50	2014-02-05	715	Sclcau
Harpia	14	1, -50	2014-02-05	715	Thamur
Harpia	14	1, -50	2014-02-05	715	Turlaw
Harpia	14	1, -50	2014-02-05	715	Xipgut
Harpia	14	1, -50	2014-02-05	730	Abucum
Harpia	14	1, -50	2014-02-05	730	Amafar
Harpia	14	1, -50	2014-02-05	730	Brocya
Harpia	14	1, -50	2014-02-05	730	Cammel
Harpia	14	1, -50	2014-02-05	730	Cercin
Harpia	14	1, -50	2014-02-05	730	Colplu
Harpia	14	1, -50	2014-02-05	730	Cymlin
Harpia	14	1, -50	2014-02-05	730	Euplan
Harpia	14	1, -50	2014-02-05	730	Geomon
Harpia	14	1, -50	2014-02-05	730	Glyspi
Harpia	14	1, -50	2014-02-05	730	Hylhyp
Harpia	14	1, -50	2014-02-05	730	Hylnae
Harpia	14	1, -50	2014-02-05	730	Jacaur
Harpia	14	1, -50	2014-02-05	730	Megmar
Harpia	14	1, -50	2014-02-05	730	Phlery
Harpia	14	1, -50	2014-02-05	730	Piomel
Harpia	14	1, -50	2014-02-05	730	Ramtuc
Harpia	14	1, -50	2014-02-05	730	Ramvit
Harpia	14	1, -50	2014-02-05	730	Sclcau
Harpia	14	1, -50	2014-02-05	730	Thamur
Harpia	14	1, -50	2014-02-05	730	Turlaw
Harpia	14	1, -50	2014-02-05	730	Xipgut
Harpia	14	1, -50	2014-02-05	745	Amafar
Harpia	14	1, -50	2014-02-05	745	Aramac
Harpia	14	1, -50	2014-02-05	745	Capnig
Harpia	14	1, -50	2014-02-05	745	Cercin
Harpia	14	1, -50	2014-02-05	745	Chipar
Harpia	14	1, -50	2014-02-05	745	Colplu
Harpia	14	1, -50	2014-02-05	745	Geomon
Harpia	14	1, -50	2014-02-05	745	Glyspi
Harpia	14	1, -50	2014-02-05	745	Hylhyp
Harpia	14	1, -50	2014-02-05	745	Myigai
Harpia	14	1, -50	2014-02-05	745	Myrmyo
Harpia	14	1, -50	2014-02-05	745	Ramtuc
Harpia	14	1, -50	2014-02-05	745	Turlaw
Harpia	14	1, -50	2014-02-05	745	unk
Harpia	14	1, -50	2014-02-05	745	Xipgut
Harpia	14	1, -50	2014-02-05	800	Amafar
Harpia	14	1, -50	2014-02-05	800	Aramac
Harpia	14	1, -50	2014-02-05	800	Cercin
Harpia	14	1, -50	2014-02-05	800	Chipar
Harpia	14	1, -50	2014-02-05	800	Colplu
Harpia	14	1, -50	2014-02-05	800	Geomon
Harpia	14	1, -50	2014-02-05	800	Hypcan
Harpia	14	1, -50	2014-02-05	800	Jacaur
Harpia	14	1, -50	2014-02-05	800	Myigai
Harpia	14	1, -50	2014-02-05	800	Myrmyo
Harpia	14	1, -50	2014-02-05	800	Piomel
Harpia	14	1, -50	2014-02-05	800	Turalb
Harpia	14	1, -50	2014-02-05	800	Turlaw
Harpia	14	1, -50	2014-02-05	800	unk
Harpia	14	1, -50	2014-02-05	800	unk
Harpia	14	1, -50	2014-02-05	800	Xipgut
Harpia	14	1, 800	2014-02-16	545	Barmar
Harpia	14	1, 800	2014-02-16	545	Cryund
Harpia	14	1, 800	2014-02-16	545	Forana
Harpia	14	1, 800	2014-02-16	545	Otuwat
Harpia	14	1, 800	2014-02-16	545	Penjac
Harpia	14	1, 800	2014-02-16	545	unk
Harpia	14	1, 800	2014-02-16	545	unk
Harpia	14	1, 800	2014-02-16	600	Barmar
Harpia	14	1, 800	2014-02-16	600	Capnig
Harpia	14	1, 800	2014-02-16	600	Cercin
Harpia	14	1, 800	2014-02-16	600	Cryund
Harpia	14	1, 800	2014-02-16	600	Cymlin
Harpia	14	1, 800	2014-02-16	600	Denruf
Harpia	14	1, 800	2014-02-16	600	Galalb
Harpia	14	1, 800	2014-02-16	600	Geomon
Harpia	14	1, 800	2014-02-16	600	Glyspi
Harpia	14	1, 800	2014-02-16	600	Myrcam
Harpia	14	1, 800	2014-02-16	600	Myrfor
Harpia	14	1, 800	2014-02-16	600	Otuwat
Harpia	14	1, 800	2014-02-16	600	Thamur
Harpia	14	1, 800	2014-02-16	600	Trovir
Harpia	14	1, 800	2014-02-16	600	Turalb
Harpia	14	1, 800	2014-02-16	600	Xipgut
Harpia	14	1, 800	2014-02-16	615	Barmar
Harpia	14	1, 800	2014-02-16	615	Capnig
Harpia	14	1, 800	2014-02-16	615	Cercin
Harpia	14	1, 800	2014-02-16	615	Cryund
Harpia	14	1, 800	2014-02-16	615	Cryvar
Harpia	14	1, 800	2014-02-16	615	Denruf
Harpia	14	1, 800	2014-02-16	615	Geomon
Harpia	14	1, 800	2014-02-16	615	Hylpoe
Harpia	14	1, 800	2014-02-16	615	Myrbra
Harpia	14	1, 800	2014-02-16	615	Myrcam
Harpia	14	1, 800	2014-02-16	615	Myrfor
Harpia	14	1, 800	2014-02-16	615	Thasch
Harpia	14	1, 800	2014-02-16	615	unk
Harpia	14	1, 800	2014-02-16	615	unk
Harpia	14	1, 800	2014-02-16	615	Xipgut
Harpia	14	1, 800	2014-02-16	630	Capnig
Harpia	14	1, 800	2014-02-16	630	Cercin
Harpia	14	1, 800	2014-02-16	630	Crysou
Harpia	14	1, 800	2014-02-16	630	Cryund
Harpia	14	1, 800	2014-02-16	630	Forcol
Harpia	14	1, 800	2014-02-16	630	Hylsub
Harpia	14	1, 800	2014-02-16	630	Hypcan
Harpia	14	1, 800	2014-02-16	630	Myrbra
Harpia	14	1, 800	2014-02-16	630	Myrfor
Harpia	14	1, 800	2014-02-16	630	Myrmyo
Harpia	14	1, 800	2014-02-16	630	Piomel
Harpia	14	1, 800	2014-02-16	630	Pygste
Harpia	14	1, 800	2014-02-16	630	Thamur
Harpia	14	1, 800	2014-02-16	630	Tinmaj
Harpia	14	1, 800	2014-02-16	630	Tromel
Harpia	14	1, 800	2014-02-16	630	Xipgut
Harpia	14	1, 800	2014-02-16	645	Aramac
Harpia	14	1, 800	2014-02-16	645	Brocya
Harpia	14	1, 800	2014-02-16	645	Camtur
Harpia	14	1, 800	2014-02-16	645	Capnig
Harpia	14	1, 800	2014-02-16	645	Cercin
Harpia	14	1, 800	2014-02-16	645	Cryund
Harpia	14	1, 800	2014-02-16	645	Hylnae
Harpia	14	1, 800	2014-02-16	645	Hyphyp
Harpia	14	1, 800	2014-02-16	645	Myrbra
Harpia	14	1, 800	2014-02-16	645	Sclnae
Harpia	14	1, 800	2014-02-16	645	Thamur
Harpia	14	1, 800	2014-02-16	645	Thrcor
Harpia	14	1, 800	2014-02-16	645	Tromel
Harpia	14	1, 800	2014-02-16	645	Xipgut
Harpia	14	1, 800	2014-02-16	700	Amafar
Harpia	14	1, 800	2014-02-16	700	Brocya
Harpia	14	1, 800	2014-02-16	700	Camtur
Harpia	14	1, 800	2014-02-16	700	Capnig
Harpia	14	1, 800	2014-02-16	700	Celgra
Harpia	14	1, 800	2014-02-16	700	Cercin
Harpia	14	1, 800	2014-02-16	700	Colplu
Harpia	14	1, 800	2014-02-16	700	Cryund
Harpia	14	1, 800	2014-02-16	700	Geomon
Harpia	14	1, 800	2014-02-16	700	Glyspi
Harpia	14	1, 800	2014-02-16	700	Hemzos
Harpia	14	1, 800	2014-02-16	700	Hylpoe
Harpia	14	1, 800	2014-02-16	700	Hypcan
Harpia	14	1, 800	2014-02-16	700	Hyphyp
Harpia	14	1, 800	2014-02-16	700	Myrbra
Harpia	14	1, 800	2014-02-16	700	Phiert
Harpia	14	1, 800	2014-02-16	700	Pitgro
Harpia	14	1, 800	2014-02-16	700	Ramtuc
Harpia	14	1, 800	2014-02-16	700	Thamur
Harpia	14	1, 800	2014-02-16	700	Thrcor
Harpia	14	1, 800	2014-02-16	700	Tromel
Harpia	14	1, 800	2014-02-16	700	Xipgut
Harpia	14	1, 800	2014-02-16	700	Xipspi
Harpia	14	1, 800	2014-02-16	715	Brocya
Harpia	14	1, 800	2014-02-16	715	Capnig
Harpia	14	1, 800	2014-02-16	715	Cercin
Harpia	14	1, 800	2014-02-16	715	Geomon
Harpia	14	1, 800	2014-02-16	715	Hylpoe
Harpia	14	1, 800	2014-02-16	715	Hyphyp
Harpia	14	1, 800	2014-02-16	715	Micmar
Harpia	14	1, 800	2014-02-16	715	Myrbra
Harpia	14	1, 800	2014-02-16	715	Phiert
Harpia	14	1, 800	2014-02-16	715	Pipchl
Harpia	14	1, 800	2014-02-16	715	Ramtuc
Harpia	14	1, 800	2014-02-16	715	Ramvit
Harpia	14	1, 800	2014-02-16	715	Thamur
Harpia	14	1, 800	2014-02-16	715	Tolass
Harpia	14	1, 800	2014-02-16	715	unk
Harpia	14	1, 800	2014-02-16	715	Xipgut
Harpia	14	1, 800	2014-02-16	730	Aramac
Harpia	14	1, 800	2014-02-16	730	Brocya
Harpia	14	1, 800	2014-02-16	730	Cammel
Harpia	14	1, 800	2014-02-16	730	Cercin
Harpia	14	1, 800	2014-02-16	730	Lopvit
Harpia	14	1, 800	2014-02-16	730	Pipchl
Harpia	14	1, 800	2014-02-16	730	Ramtuc
Harpia	14	1, 800	2014-02-16	730	Ramvit
Harpia	14	1, 800	2014-02-16	730	Sclnae
Harpia	14	1, 800	2014-02-16	730	unk
Harpia	14	1, 800	2014-02-16	730	Xipgut
Harpia	14	1, 800	2014-02-16	745	Brocya
Harpia	14	1, 800	2014-02-16	745	Cammel
Harpia	14	1, 800	2014-02-16	745	Capnig
Harpia	14	1, 800	2014-02-16	745	Colplu
Harpia	14	1, 800	2014-02-16	745	Geomon
Harpia	14	1, 800	2014-02-16	745	Liotho
Harpia	14	1, 800	2014-02-16	745	Lopvit
Harpia	14	1, 800	2014-02-16	745	Pygste
Harpia	14	1, 800	2014-02-16	745	Thrcor
Harpia	14	1, 800	2014-02-16	800	Amafar
Harpia	14	1, 800	2014-02-16	800	Brocya
Harpia	14	1, 800	2014-02-16	800	Cammel
Harpia	14	1, 800	2014-02-16	800	Capnig
Harpia	14	1, 800	2014-02-16	800	Colplu
Harpia	14	1, 800	2014-02-16	800	Crysou
Harpia	14	1, 800	2014-02-16	800	Cymlin
Harpia	14	1, 800	2014-02-16	800	Forcol
Harpia	14	1, 800	2014-02-16	800	Geomon
Harpia	14	1, 800	2014-02-16	800	Geomon
Harpia	14	1, 800	2014-02-16	800	Hypcan
Harpia	14	1, 800	2014-02-16	800	Liotho
Harpia	14	1, 800	2014-02-16	800	Lopvit
Harpia	14	1, 800	2014-02-16	800	Thrcor
Harpia	14	1, 800	2014-02-16	800	Tolass
Harpia	14	10, 200	2014-02-07	545	Abucum
Harpia	14	10, 200	2014-02-07	545	Crysou
Harpia	14	10, 200	2014-02-07	545	Cryvar
Harpia	14	10, 200	2014-02-07	600	Barmar
Harpia	14	10, 200	2014-02-07	600	Cryvar
Harpia	14	10, 200	2014-02-07	600	Denruf
Harpia	14	10, 200	2014-02-07	600	Geomon
Harpia	14	10, 200	2014-02-07	600	Thaard
Harpia	14	10, 200	2014-02-07	600	Thacae
Harpia	14	10, 200	2014-02-07	600	Tolass
Harpia	14	10, 200	2014-02-07	600	Turlaw
Harpia	14	10, 200	2014-02-07	600	Unk
Harpia	14	10, 200	2014-02-07	600	Xipgut
Harpia	14	10, 200	2014-02-07	615	Colplu
Harpia	14	10, 200	2014-02-07	615	Geomon
Harpia	14	10, 200	2014-02-07	615	Hylpoe
Harpia	14	10, 200	2014-02-07	615	Lipvoc
Harpia	14	10, 200	2014-02-07	615	Myraxi
Harpia	14	10, 200	2014-02-07	615	Myrcam
Harpia	14	10, 200	2014-02-07	615	Myrlon
Harpia	14	10, 200	2014-02-07	615	Myrmen
Harpia	14	10, 200	2014-02-07	615	Thaard
Harpia	14	10, 200	2014-02-07	615	Thacae
Harpia	14	10, 200	2014-02-07	615	Thamur
Harpia	14	10, 200	2014-02-07	615	Thasch
Harpia	14	10, 200	2014-02-07	615	Turlaw
Harpia	14	10, 200	2014-02-07	615	Xipgut
Harpia	14	10, 200	2014-02-07	630	Colplu
Harpia	14	10, 200	2014-02-07	630	Cryvar
Harpia	14	10, 200	2014-02-07	630	Denruf
Harpia	14	10, 200	2014-02-07	630	Geomon
Harpia	14	10, 200	2014-02-07	630	Hylhyp
Harpia	14	10, 200	2014-02-07	630	Hyloch
Harpia	14	10, 200	2014-02-07	630	Hylpoe
Harpia	14	10, 200	2014-02-07	630	Lipvoc
Harpia	14	10, 200	2014-02-07	630	Myraxi
Harpia	14	10, 200	2014-02-07	630	Myrbra
Harpia	14	10, 200	2014-02-07	630	Myrcam
Harpia	14	10, 200	2014-02-07	630	Myrery
Harpia	14	10, 200	2014-02-07	630	Myrlon
Harpia	14	10, 200	2014-02-07	630	Myrmen
Harpia	14	10, 200	2014-02-07	630	Myrmyo
Harpia	14	10, 200	2014-02-07	630	Thaard
Harpia	14	10, 200	2014-02-07	630	Thacae
Harpia	14	10, 200	2014-02-07	630	Thamur
Harpia	14	10, 200	2014-02-07	630	Thasch
Harpia	14	10, 200	2014-02-07	630	Thrcor
Harpia	14	10, 200	2014-02-07	630	Turlaw
Harpia	14	10, 200	2014-02-07	645	Brocya
Harpia	14	10, 200	2014-02-07	645	Capnig
Harpia	14	10, 200	2014-02-07	645	Colplu
Harpia	14	10, 200	2014-02-07	645	Cryvar
Harpia	14	10, 200	2014-02-07	645	Cyavio
Harpia	14	10, 200	2014-02-07	645	Cymlin
Harpia	14	10, 200	2014-02-07	645	Geomon
Harpia	14	10, 200	2014-02-07	645	Hylhyp
Harpia	14	10, 200	2014-02-07	645	Hyloch
Harpia	14	10, 200	2014-02-07	645	Lipvoc
Harpia	14	10, 200	2014-02-07	645	Myrcam
Harpia	14	10, 200	2014-02-07	645	Thaard
Harpia	14	10, 200	2014-02-07	645	Thamur
Harpia	14	10, 200	2014-02-07	645	Thasch
Harpia	14	10, 200	2014-02-07	645	Tolass
Harpia	14	10, 200	2014-02-07	645	Turalb
Harpia	14	10, 200	2014-02-07	645	Turlaw
Harpia	14	10, 200	2014-02-07	700	Ancstr
Harpia	14	10, 200	2014-02-07	700	Geomon
Harpia	14	10, 200	2014-02-07	700	Hylhyp
Harpia	14	10, 200	2014-02-07	700	Hyloch
Harpia	14	10, 200	2014-02-07	700	Lipvoc
Harpia	14	10, 200	2014-02-07	700	Myrbra
Harpia	14	10, 200	2014-02-07	700	Myrcam
Harpia	14	10, 200	2014-02-07	700	Nonbru
Harpia	14	10, 200	2014-02-07	700	Rhysim
Harpia	14	10, 200	2014-02-07	700	Thacae
Harpia	14	10, 200	2014-02-07	700	Thasch
Harpia	14	10, 200	2014-02-07	700	Tolass
Harpia	14	10, 200	2014-02-07	700	Turlaw
Harpia	14	10, 200	2014-02-07	700	Tyrsto
Harpia	14	10, 200	2014-02-07	700	Unk
Harpia	14	10, 200	2014-02-07	715	Colplu
Harpia	14	10, 200	2014-02-07	715	Geomon
Harpia	14	10, 200	2014-02-07	715	Lipvoc
Harpia	14	10, 200	2014-02-07	715	Myrbra
Harpia	14	10, 200	2014-02-07	715	Myrcam
Harpia	14	10, 200	2014-02-07	715	Myrhau
Harpia	14	10, 200	2014-02-07	715	Myrmyo
Harpia	14	10, 200	2014-02-07	715	Thacae
Harpia	14	10, 200	2014-02-07	715	Tingut
Harpia	14	10, 200	2014-02-07	715	Tolass
Harpia	14	10, 200	2014-02-07	715	Turalb
Harpia	14	10, 200	2014-02-07	715	Turlaw
Harpia	14	10, 200	2014-02-07	730	Amafar
Harpia	14	10, 200	2014-02-07	730	Brocya
Harpia	14	10, 200	2014-02-07	730	Capnig
Harpia	14	10, 200	2014-02-07	730	Colplu
Harpia	14	10, 200	2014-02-07	730	Galalb
Harpia	14	10, 200	2014-02-07	730	Hylhyp
Harpia	14	10, 200	2014-02-07	730	Lipvoc
Harpia	14	10, 200	2014-02-07	730	Myrcam
Harpia	14	10, 200	2014-02-07	730	Ramtuc
Harpia	14	10, 200	2014-02-07	730	Thamur
Harpia	14	10, 200	2014-02-07	730	Tolass
Harpia	14	10, 200	2014-02-07	730	Turlaw
Harpia	14	10, 200	2014-02-07	745	Aramac
Harpia	14	10, 200	2014-02-07	745	Colplu
Harpia	14	10, 200	2014-02-07	745	Galalb
Harpia	14	10, 200	2014-02-07	745	Lipvoc
Harpia	14	10, 200	2014-02-07	745	Myrcam
Harpia	14	10, 200	2014-02-07	745	Piomen
Harpia	14	10, 200	2014-02-07	745	Ramtuc
Harpia	14	10, 200	2014-02-07	745	Turalb
Harpia	14	10, 200	2014-02-07	745	Turlaw
Harpia	14	10, 200	2014-02-07	745	Tyrsto
Harpia	14	10, 200	2014-02-07	745	Unkwp
Harpia	14	10, 200	2014-02-07	800	Aramac
Harpia	14	10, 200	2014-02-07	800	Brocya
Harpia	14	10, 200	2014-02-07	800	Capnig
Harpia	14	10, 200	2014-02-07	800	Colplu
Harpia	14	10, 200	2014-02-07	800	Galalb
Harpia	14	10, 200	2014-02-07	800	Lipvoc
Harpia	14	10, 200	2014-02-07	800	Myrcam
Harpia	14	10, 200	2014-02-07	800	Ramtuc
Harpia	14	10, 200	2014-02-07	800	Ramvit
Harpia	14	10, 200	2014-02-07	800	Turalb
Harpia	14	10, 200	2014-02-07	800	Tyrsto
Harpia	14	10, 200	2014-02-07	800	Unkwp
Harpia	14	10, 200	2014-02-07	800	Xipgut
Harpia	14	10, 600	2014-02-14	545	Abucum
Harpia	14	10, 600	2014-02-14	545	Barmar
Harpia	14	10, 600	2014-02-14	545	Nycgri
Harpia	14	10, 600	2014-02-14	545	Nycoce
Harpia	14	10, 600	2014-02-14	545	Turalb
Harpia	14	10, 600	2014-02-14	545	Xipgut
Harpia	14	10, 600	2014-02-14	600	Barmar
Harpia	14	10, 600	2014-02-14	600	Dencer
Harpia	14	10, 600	2014-02-14	600	Geomon
Harpia	14	10, 600	2014-02-14	600	Lipvoc
Harpia	14	10, 600	2014-02-14	600	Micgil
Harpia	14	10, 600	2014-02-14	600	Myrcam
Harpia	14	10, 600	2014-02-14	600	Otuwat
Harpia	14	10, 600	2014-02-14	600	Pygste
Harpia	14	10, 600	2014-02-14	600	Turalb
Harpia	14	10, 600	2014-02-14	600	Unk
Harpia	14	10, 600	2014-02-14	600	Xipgut
Harpia	14	10, 600	2014-02-14	615	Capnig
Harpia	14	10, 600	2014-02-14	615	Cercin
Harpia	14	10, 600	2014-02-14	615	Cymlin
Harpia	14	10, 600	2014-02-14	615	Dencer
Harpia	14	10, 600	2014-02-14	615	Galalb
Harpia	14	10, 600	2014-02-14	615	Geomon
Harpia	14	10, 600	2014-02-14	615	Hylhyp
Harpia	14	10, 600	2014-02-14	615	Hyloch
Harpia	14	10, 600	2014-02-14	615	Myrcam
Harpia	14	10, 600	2014-02-14	615	Psavir
Harpia	14	10, 600	2014-02-14	615	Pygste
Harpia	14	10, 600	2014-02-14	615	Unk
Harpia	14	10, 600	2014-02-14	615	Xipgut
Harpia	14	10, 600	2014-02-14	630	Cammel
Harpia	14	10, 600	2014-02-14	630	Cymlin
Harpia	14	10, 600	2014-02-14	630	Dencer
Harpia	14	10, 600	2014-02-14	630	Galalb
Harpia	14	10, 600	2014-02-14	630	Geomon
Harpia	14	10, 600	2014-02-14	630	Glyspi
Harpia	14	10, 600	2014-02-14	630	Hylhyp
Harpia	14	10, 600	2014-02-14	630	Myraxi
Harpia	14	10, 600	2014-02-14	630	Myrcam
Harpia	14	10, 600	2014-02-14	630	Phiert
Harpia	14	10, 600	2014-02-14	630	Piomel
Harpia	14	10, 600	2014-02-14	630	Thamur
Harpia	14	10, 600	2014-02-14	630	Unk
Harpia	14	10, 600	2014-02-14	630	Unk
Harpia	14	10, 600	2014-02-14	630	Xipgut
Harpia	14	10, 600	2014-02-14	645	Autinf
Harpia	14	10, 600	2014-02-14	645	Capnig
Harpia	14	10, 600	2014-02-14	645	Colplu
Harpia	14	10, 600	2014-02-14	645	Cymlin
Harpia	14	10, 600	2014-02-14	645	Forcol
Harpia	14	10, 600	2014-02-14	645	Geomon
Harpia	14	10, 600	2014-02-14	645	Myrcam
Harpia	14	10, 600	2014-02-14	645	Phiert
Harpia	14	10, 600	2014-02-14	645	Piomel
Harpia	14	10, 600	2014-02-14	645	Ramtuc
Harpia	14	10, 600	2014-02-14	645	Thasch
Harpia	14	10, 600	2014-02-14	645	Unk
Harpia	14	10, 600	2014-02-14	645	Unk
Harpia	14	10, 600	2014-02-14	645	Unk
Harpia	14	10, 600	2014-02-14	645	Unk
Harpia	14	10, 600	2014-02-14	645	Unk
Harpia	14	10, 600	2014-02-14	700	Colplu
Harpia	14	10, 600	2014-02-14	700	Cymlin
Harpia	14	10, 600	2014-02-14	700	Galalb
Harpia	14	10, 600	2014-02-14	700	Geomon
Harpia	14	10, 600	2014-02-14	700	Myrcam
Harpia	14	10, 600	2014-02-14	700	Phonig
Harpia	14	10, 600	2014-02-14	700	Tromel
Harpia	14	10, 600	2014-02-14	700	Unk
Harpia	14	10, 600	2014-02-14	700	Xipgut
Harpia	14	10, 600	2014-02-14	715	Brocya
Harpia	14	10, 600	2014-02-14	715	Capnig
Harpia	14	10, 600	2014-02-14	715	Colplu
Harpia	14	10, 600	2014-02-14	715	Cymlin
Harpia	14	10, 600	2014-02-14	715	Geomon
Harpia	14	10, 600	2014-02-14	715	Glyspi
Harpia	14	10, 600	2014-02-14	715	Myrcam
Harpia	14	10, 600	2014-02-14	715	Thacae
Harpia	14	10, 600	2014-02-14	715	Thamur
Harpia	14	10, 600	2014-02-14	715	Tromel
Harpia	14	10, 600	2014-02-14	715	Unk
Harpia	14	10, 600	2014-02-14	715	Xipgut
Harpia	14	10, 600	2014-02-14	730	Brocya
Harpia	14	10, 600	2014-02-14	730	Cercin
Harpia	14	10, 600	2014-02-14	730	Cymlin
Harpia	14	10, 600	2014-02-14	730	Geomon
Harpia	14	10, 600	2014-02-14	730	Glyspi
Harpia	14	10, 600	2014-02-14	730	Myrcam
Harpia	14	10, 600	2014-02-14	730	Ramtuc
Harpia	14	10, 600	2014-02-14	730	Tromel
Harpia	14	10, 600	2014-02-14	730	Unk
Harpia	14	10, 600	2014-02-14	730	Xipgut
Harpia	14	10, 600	2014-02-14	745	Cercin
Harpia	14	10, 600	2014-02-14	745	Colplu
Harpia	14	10, 600	2014-02-14	745	Cymlin
Harpia	14	10, 600	2014-02-14	745	Elepla
Harpia	14	10, 600	2014-02-14	745	Geomon
Harpia	14	10, 600	2014-02-14	745	Hypcan
Harpia	14	10, 600	2014-02-14	745	Myrcam
Harpia	14	10, 600	2014-02-14	745	Piomel
Harpia	14	10, 600	2014-02-14	745	Thamur
Harpia	14	10, 600	2014-02-14	745	Thasch
Harpia	14	10, 600	2014-02-14	745	Unk
Harpia	14	10, 600	2014-02-14	745	Xipgut
Harpia	14	10, 600	2014-02-14	800	Capnig
Harpia	14	10, 600	2014-02-14	800	Cercin
Harpia	14	10, 600	2014-02-14	800	Geomon
Harpia	14	10, 600	2014-02-14	800	Hylpoe
Harpia	14	10, 600	2014-02-14	800	Myrcam
Harpia	14	10, 600	2014-02-14	800	Phiert
Harpia	14	10, 600	2014-02-14	800	Psavir
Harpia	14	10, 600	2014-02-14	800	Xipobs
Harpia	14	2, 200	2014-02-07	545	Abucum
Harpia	14	2, 200	2014-02-07	545	Cichuh
Harpia	14	2, 200	2014-02-07	545	Nonbru
Harpia	14	2, 200	2014-02-07	545	Nycaet
Harpia	14	2, 200	2014-02-07	545	Nycgra
Harpia	14	2, 200	2014-02-07	545	Nycgri
Harpia	14	2, 200	2014-02-07	545	Nycoce
Harpia	14	2, 200	2014-02-07	600	Cercin
Harpia	14	2, 200	2014-02-07	600	Cryvar
Harpia	14	2, 200	2014-02-07	600	Liotho
Harpia	14	2, 200	2014-02-07	600	Myrfor
Harpia	14	2, 200	2014-02-07	600	Nonbru
Harpia	14	2, 200	2014-02-07	600	Nycoce
Harpia	14	2, 200	2014-02-07	600	Penjac
Harpia	14	2, 200	2014-02-07	600	Turlaw
Harpia	14	2, 200	2014-02-07	615	Barmar
Harpia	14	2, 200	2014-02-07	615	Celfla
Harpia	14	2, 200	2014-02-07	615	Cercin
Harpia	14	2, 200	2014-02-07	615	Cymlin
Harpia	14	2, 200	2014-02-07	615	Myrfor
Harpia	14	2, 200	2014-02-07	615	Myrmyo
Harpia	14	2, 200	2014-02-07	615	Pitgro
Harpia	14	2, 200	2014-02-07	615	Ramtuc
Harpia	14	2, 200	2014-02-07	615	Thamur
Harpia	14	2, 200	2014-02-07	615	Tingut
Harpia	14	2, 200	2014-02-07	615	Turlaw
Harpia	14	2, 200	2014-02-07	630	Camrub
Harpia	14	2, 200	2014-02-07	630	Capnig
Harpia	14	2, 200	2014-02-07	630	Cryvar
Harpia	14	2, 200	2014-02-07	630	Geomon
Harpia	14	2, 200	2014-02-07	630	Liotho
Harpia	14	2, 200	2014-02-07	630	Myrbra
Harpia	14	2, 200	2014-02-07	630	Myrfor
Harpia	14	2, 200	2014-02-07	630	Pitgro
Harpia	14	2, 200	2014-02-07	630	Sclmex
Harpia	14	2, 200	2014-02-07	630	Thamur
Harpia	14	2, 200	2014-02-07	630	Tingut
Harpia	14	2, 200	2014-02-07	630	Turlaw
Harpia	14	2, 200	2014-02-07	645	Cammel
Harpia	14	2, 200	2014-02-07	645	Camtur
Harpia	14	2, 200	2014-02-07	645	Capnig
Harpia	14	2, 200	2014-02-07	645	Cercin
Harpia	14	2, 200	2014-02-07	645	Geomon
Harpia	14	2, 200	2014-02-07	645	Hylpoe
Harpia	14	2, 200	2014-02-07	645	Liotho
Harpia	14	2, 200	2014-02-07	645	Pipchl
Harpia	14	2, 200	2014-02-07	645	Pteplu
Harpia	14	2, 200	2014-02-07	645	Thasch
Harpia	14	2, 200	2014-02-07	645	Thrcor
Harpia	14	2, 200	2014-02-07	645	Tingut
Harpia	14	2, 200	2014-02-07	645	Turlaw
Harpia	14	2, 200	2014-02-07	700	Abucum
Harpia	14	2, 200	2014-02-07	700	Brocya
Harpia	14	2, 200	2014-02-07	700	Capnig
Harpia	14	2, 200	2014-02-07	700	Cercin
Harpia	14	2, 200	2014-02-07	700	Geomon
Harpia	14	2, 200	2014-02-07	700	Liotho
Harpia	14	2, 200	2014-02-07	700	Pipchl
Harpia	14	2, 200	2014-02-07	700	Ramvit
Harpia	14	2, 200	2014-02-07	700	Tingut
Harpia	14	2, 200	2014-02-07	700	Turlaw
Harpia	14	2, 200	2014-02-07	700	unk
Harpia	14	2, 200	2014-02-07	715	Abucum
Harpia	14	2, 200	2014-02-07	715	Aramac
Harpia	14	2, 200	2014-02-07	715	Capnig
Harpia	14	2, 200	2014-02-07	715	Celfla
Harpia	14	2, 200	2014-02-07	715	Cercin
Harpia	14	2, 200	2014-02-07	715	Geomon
Harpia	14	2, 200	2014-02-07	715	Liotho
Harpia	14	2, 200	2014-02-07	715	Myrfor
Harpia	14	2, 200	2014-02-07	715	Myrmyo
Harpia	14	2, 200	2014-02-07	715	Pipchl
Harpia	14	2, 200	2014-02-07	715	Thamur
Harpia	14	2, 200	2014-02-07	715	Tingut
Harpia	14	2, 200	2014-02-07	715	Turlaw
Harpia	14	2, 200	2014-02-07	715	unk
Harpia	14	2, 200	2014-02-07	715	unk
Harpia	14	2, 200	2014-02-07	730	Abucum
Harpia	14	2, 200	2014-02-07	730	Abucum
Harpia	14	2, 200	2014-02-07	730	Barmar
Harpia	14	2, 200	2014-02-07	730	Brocya
Harpia	14	2, 200	2014-02-07	730	Capnig
Harpia	14	2, 200	2014-02-07	730	Cercin
Harpia	14	2, 200	2014-02-07	730	Colplu
Harpia	14	2, 200	2014-02-07	730	Geomon
Harpia	14	2, 200	2014-02-07	730	Hylpoe
Harpia	14	2, 200	2014-02-07	730	Liotho
Harpia	14	2, 200	2014-02-07	730	Pipchl
Harpia	14	2, 200	2014-02-07	730	Ramtuc
Harpia	14	2, 200	2014-02-07	730	Thamur
Harpia	14	2, 200	2014-02-07	730	Thrcor
Harpia	14	2, 200	2014-02-07	730	unk
Harpia	14	2, 200	2014-02-07	745	Amafar
Harpia	14	2, 200	2014-02-07	745	Aramac
Harpia	14	2, 200	2014-02-07	745	Barmar
Harpia	14	2, 200	2014-02-07	745	Cammel
Harpia	14	2, 200	2014-02-07	745	Capnig
Harpia	14	2, 200	2014-02-07	745	Cercin
Harpia	14	2, 200	2014-02-07	745	Chipar
Harpia	14	2, 200	2014-02-07	745	Colplu
Harpia	14	2, 200	2014-02-07	745	Cymlin
Harpia	14	2, 200	2014-02-07	745	Drylin
Harpia	14	2, 200	2014-02-07	745	Geomon
Harpia	14	2, 200	2014-02-07	745	Hylpoe
Harpia	14	2, 200	2014-02-07	745	Liotho
Harpia	14	2, 200	2014-02-07	745	Ramvit
Harpia	14	2, 200	2014-02-07	745	Thamur
Harpia	14	2, 200	2014-02-07	745	Thrcor
Harpia	14	2, 200	2014-02-07	745	Tingut
Harpia	14	2, 200	2014-02-07	745	unk
Harpia	14	2, 200	2014-02-07	745	unk
Harpia	14	2, 200	2014-02-07	800	Amafar
Harpia	14	2, 200	2014-02-07	800	Aramac
Harpia	14	2, 200	2014-02-07	800	Cammel
Harpia	14	2, 200	2014-02-07	800	Capnig
Harpia	14	2, 200	2014-02-07	800	Cercin
Harpia	14	2, 200	2014-02-07	800	Chipar
Harpia	14	2, 200	2014-02-07	800	Colplu
Harpia	14	2, 200	2014-02-07	800	Cymlin
Harpia	14	2, 200	2014-02-07	800	Liotho
Harpia	14	2, 200	2014-02-07	800	Ramtuc
Harpia	14	2, 200	2014-02-07	800	Ramvit
Harpia	14	2, 200	2014-02-07	800	Thamur
Harpia	14	2, 200	2014-02-07	800	Trovir
Harpia	14	2, 600	2014-02-14	545	Abucum
Harpia	14	2, 600	2014-02-14	545	Hylpoe
Harpia	14	2, 600	2014-02-14	545	Otuwat
Harpia	14	2, 600	2014-02-14	600	Autinf
Harpia	14	2, 600	2014-02-14	600	Capnig
Harpia	14	2, 600	2014-02-14	600	Cercin
Harpia	14	2, 600	2014-02-14	600	Dapame
Harpia	14	2, 600	2014-02-14	600	Dencer
Harpia	14	2, 600	2014-02-14	600	Denruf
Harpia	14	2, 600	2014-02-14	600	Hylsub
Harpia	14	2, 600	2014-02-14	600	Liotho
Harpia	14	2, 600	2014-02-14	600	Myrcam
Harpia	14	2, 600	2014-02-14	600	Myrfor
Harpia	14	2, 600	2014-02-14	600	Tinmaj
Harpia	14	2, 600	2014-02-14	600	unk
Harpia	14	2, 600	2014-02-14	600	Xipgut
Harpia	14	2, 600	2014-02-14	615	Amafar
Harpia	14	2, 600	2014-02-14	615	Autinf
Harpia	14	2, 600	2014-02-14	615	Capnig
Harpia	14	2, 600	2014-02-14	615	Celgra
Harpia	14	2, 600	2014-02-14	615	Cryvar
Harpia	14	2, 600	2014-02-14	615	Liotho
Harpia	14	2, 600	2014-02-14	615	Turalb
Harpia	14	2, 600	2014-02-14	615	unk
Harpia	14	2, 600	2014-02-14	615	unk
Harpia	14	2, 600	2014-02-14	615	unk
Harpia	14	2, 600	2014-02-14	615	Xipgut
Harpia	14	2, 600	2014-02-14	630	Amafar
Harpia	14	2, 600	2014-02-14	630	Autinf
Harpia	14	2, 600	2014-02-14	630	Crysou
Harpia	14	2, 600	2014-02-14	630	Hylsub
Harpia	14	2, 600	2014-02-14	630	Liotho
Harpia	14	2, 600	2014-02-14	630	Myrbra
Harpia	14	2, 600	2014-02-14	630	Myrcam
Harpia	14	2, 600	2014-02-14	630	Myrfor
Harpia	14	2, 600	2014-02-14	630	Piomen
Harpia	14	2, 600	2014-02-14	630	Pitgro
Harpia	14	2, 600	2014-02-14	630	Ramtuc
Harpia	14	2, 600	2014-02-14	630	Thrcor
Harpia	14	2, 600	2014-02-14	630	Tingut
Harpia	14	2, 600	2014-02-14	630	unk
Harpia	14	2, 600	2014-02-14	630	Xipgut
Harpia	14	2, 600	2014-02-14	645	Amafar
Harpia	14	2, 600	2014-02-14	645	Autinf
Harpia	14	2, 600	2014-02-14	645	Capnig
Harpia	14	2, 600	2014-02-14	645	Celgra
Harpia	14	2, 600	2014-02-14	645	Chipar
Harpia	14	2, 600	2014-02-14	645	Denruf
Harpia	14	2, 600	2014-02-14	645	Glyspi
Harpia	14	2, 600	2014-02-14	645	Hylsub
Harpia	14	2, 600	2014-02-14	645	Liotho
Harpia	14	2, 600	2014-02-14	645	Myrbra
Harpia	14	2, 600	2014-02-14	645	Myrcam
Harpia	14	2, 600	2014-02-14	645	Myrfor
Harpia	14	2, 600	2014-02-14	645	Thrcor
Harpia	14	2, 600	2014-02-14	645	Tingut
Harpia	14	2, 600	2014-02-14	645	unk
Harpia	14	2, 600	2014-02-14	645	unk
Harpia	14	2, 600	2014-02-14	645	Xipgut
Harpia	14	2, 600	2014-02-14	700	Autinf
Harpia	14	2, 600	2014-02-14	700	Capnig
Harpia	14	2, 600	2014-02-14	700	Colplu
Harpia	14	2, 600	2014-02-14	700	Geomon
Harpia	14	2, 600	2014-02-14	700	Herdug
Harpia	14	2, 600	2014-02-14	700	Liotho
Harpia	14	2, 600	2014-02-14	700	Myrbra
Harpia	14	2, 600	2014-02-14	700	Myrcam
Harpia	14	2, 600	2014-02-14	700	Myrfor
Harpia	14	2, 600	2014-02-14	700	Selrei
Harpia	14	2, 600	2014-02-14	700	Tingut
Harpia	14	2, 600	2014-02-14	700	Trovir
Harpia	14	2, 600	2014-02-14	700	unk
Harpia	14	2, 600	2014-02-14	700	unk
Harpia	14	2, 600	2014-02-14	700	unk
Harpia	14	2, 600	2014-02-14	700	Xipgut
Harpia	14	2, 600	2014-02-14	700	Xipgut
Harpia	14	2, 600	2014-02-14	715	Capnig
Harpia	14	2, 600	2014-02-14	715	Chipar
Harpia	14	2, 600	2014-02-14	715	Dapame
Harpia	14	2, 600	2014-02-14	715	Geomon
Harpia	14	2, 600	2014-02-14	715	Herdug
Harpia	14	2, 600	2014-02-14	715	Hylsub
Harpia	14	2, 600	2014-02-14	715	Liotho
Harpia	14	2, 600	2014-02-14	715	Myrbra
Harpia	14	2, 600	2014-02-14	715	Myrcam
Harpia	14	2, 600	2014-02-14	715	Myrfor
Harpia	14	2, 600	2014-02-14	715	Selrei
Harpia	14	2, 600	2014-02-14	715	Thrcor
Harpia	14	2, 600	2014-02-14	715	unk
Harpia	14	2, 600	2014-02-14	715	Xipgut
Harpia	14	2, 600	2014-02-14	730	Brocya
Harpia	14	2, 600	2014-02-14	730	Cammel
Harpia	14	2, 600	2014-02-14	730	Capnig
Harpia	14	2, 600	2014-02-14	730	Chipar
Harpia	14	2, 600	2014-02-14	730	Colplu
Harpia	14	2, 600	2014-02-14	730	Dapame
Harpia	14	2, 600	2014-02-14	730	Drylin
Harpia	14	2, 600	2014-02-14	730	Glyspi
Harpia	14	2, 600	2014-02-14	730	Herdug
Harpia	14	2, 600	2014-02-14	730	Liotho
Harpia	14	2, 600	2014-02-14	730	Myrbra
Harpia	14	2, 600	2014-02-14	730	Myrcam
Harpia	14	2, 600	2014-02-14	730	Ramtuc
Harpia	14	2, 600	2014-02-14	730	unk
Harpia	14	2, 600	2014-02-14	745	Brocya
Harpia	14	2, 600	2014-02-14	745	Capnig
Harpia	14	2, 600	2014-02-14	745	Chipar
Harpia	14	2, 600	2014-02-14	745	Dapame
Harpia	14	2, 600	2014-02-14	745	Herdug
Harpia	14	2, 600	2014-02-14	745	Herdug
Harpia	14	2, 600	2014-02-14	745	Liotho
Harpia	14	2, 600	2014-02-14	745	Myrbra
Harpia	14	2, 600	2014-02-14	745	Myrcam
Harpia	14	2, 600	2014-02-14	745	Ramtuc
Harpia	14	2, 600	2014-02-14	745	Ramtuc
Harpia	14	2, 600	2014-02-14	745	Ramvit
Harpia	14	2, 600	2014-02-14	745	Thacae
Harpia	14	2, 600	2014-02-14	745	Thasch
Harpia	14	2, 600	2014-02-14	745	Thrcor
Harpia	14	2, 600	2014-02-14	745	unk
Harpia	14	2, 600	2014-02-14	745	unk
Harpia	14	2, 600	2014-02-14	745	unk
Harpia	14	2, 600	2014-02-14	745	Xipgut
Harpia	14	2, 600	2014-02-14	800	Brocya
Harpia	14	2, 600	2014-02-14	800	Capnig
Harpia	14	2, 600	2014-02-14	800	Chipar
Harpia	14	2, 600	2014-02-14	800	Cyavio
Harpia	14	2, 600	2014-02-14	800	Cymlin
Harpia	14	2, 600	2014-02-14	800	Dapame
Harpia	14	2, 600	2014-02-14	800	Herdug
Harpia	14	2, 600	2014-02-14	800	Liotho
Harpia	14	2, 600	2014-02-14	800	Myrbra
Harpia	14	2, 600	2014-02-14	800	Myrcam
Harpia	14	2, 600	2014-02-14	800	Myrery
Harpia	14	2, 600	2014-02-14	800	Pitgro
Harpia	14	2, 600	2014-02-14	800	Pteaza
Harpia	14	2, 600	2014-02-14	800	Rammel
Harpia	14	2, 600	2014-02-14	800	Thacae
Harpia	14	2, 600	2014-02-14	800	Thasch
Harpia	14	2, 600	2014-02-14	800	Tingut
Harpia	14	2, 600	2014-02-14	800	unk
Harpia	14	2, 600	2014-02-14	800	unk
Harpia	14	2, 600	2014-02-14	800	unk
Harpia	14	2, 600	2014-02-14	800	unk	loud call
Harpia	14	2, 600	2014-02-14	800	Unkwp
Harpia	14	3, 400	2014-02-12	545	Hylsub
Harpia	14	3, 400	2014-02-12	545	Lopcri
Harpia	14	3, 400	2014-02-12	545	Nycaet
Harpia	14	3, 400	2014-02-12	545	Nycgri
Harpia	14	3, 400	2014-02-12	545	Unk	saved
Harpia	14	3, 400	2014-02-12	600	Hylsub
Harpia	14	3, 400	2014-02-12	600	Hypcan
Harpia	14	3, 400	2014-02-12	600	Liotho
Harpia	14	3, 400	2014-02-12	600	Piomel
Harpia	14	3, 400	2014-02-12	600	Piomen
Harpia	14	3, 400	2014-02-12	600	Pipchl
Harpia	14	3, 400	2014-02-12	600	Thacae
Harpia	14	3, 400	2014-02-12	600	Thamur
Harpia	14	3, 400	2014-02-12	600	Tinmaj
Harpia	14	3, 400	2014-02-12	600	Xipgut
Harpia	14	3, 400	2014-02-12	615	Ancstr
Harpia	14	3, 400	2014-02-12	615	Barmar
Harpia	14	3, 400	2014-02-12	615	Brocya
Harpia	14	3, 400	2014-02-12	615	Dencer
Harpia	14	3, 400	2014-02-12	615	Geomon
Harpia	14	3, 400	2014-02-12	615	Glyspi
Harpia	14	3, 400	2014-02-12	615	Hylpoe
Harpia	14	3, 400	2014-02-12	615	Hyphyp
Harpia	14	3, 400	2014-02-12	615	Liotho
Harpia	14	3, 400	2014-02-12	615	Myrmyo
Harpia	14	3, 400	2014-02-12	615	Pipchl
Harpia	14	3, 400	2014-02-12	615	Schleu
Harpia	14	3, 400	2014-02-12	615	Thaard
Harpia	14	3, 400	2014-02-12	615	Thamur
Harpia	14	3, 400	2014-02-12	615	Tingut
Harpia	14	3, 400	2014-02-12	615	Unk
Harpia	14	3, 400	2014-02-12	615	Unk
Harpia	14	3, 400	2014-02-12	615	Unk
Harpia	14	3, 400	2014-02-12	615	Unk
Harpia	14	3, 400	2014-02-12	615	Xipgut
Harpia	14	3, 400	2014-02-12	630	Brocya
Harpia	14	3, 400	2014-02-12	630	Cammel
Harpia	14	3, 400	2014-02-12	630	Geomon
Harpia	14	3, 400	2014-02-12	630	Hylpoe
Harpia	14	3, 400	2014-02-12	630	Liotho
Harpia	14	3, 400	2014-02-12	630	Myraxi
Harpia	14	3, 400	2014-02-12	630	Myrbra
Harpia	14	3, 400	2014-02-12	630	Myrmen
Harpia	14	3, 400	2014-02-12	630	Phiert
Harpia	14	3, 400	2014-02-12	630	Pipchl
Harpia	14	3, 400	2014-02-12	630	Rhysim
Harpia	14	3, 400	2014-02-12	630	Schleu
Harpia	14	3, 400	2014-02-12	630	Thaard
Harpia	14	3, 400	2014-02-12	630	Thacae
Harpia	14	3, 400	2014-02-12	630	Thasch
Harpia	14	3, 400	2014-02-12	630	Tinmaj
Harpia	14	3, 400	2014-02-12	630	Unk
Harpia	14	3, 400	2014-02-12	630	Xipgut
Harpia	14	3, 400	2014-02-12	645	Barmar
Harpia	14	3, 400	2014-02-12	645	Cercin
Harpia	14	3, 400	2014-02-12	645	Cyavio
Harpia	14	3, 400	2014-02-12	645	Geomon
Harpia	14	3, 400	2014-02-12	645	Glyspi
Harpia	14	3, 400	2014-02-12	645	Liotho
Harpia	14	3, 400	2014-02-12	645	Myrbra
Harpia	14	3, 400	2014-02-12	645	Myrfor
Harpia	14	3, 400	2014-02-12	645	Myrlon
Harpia	14	3, 400	2014-02-12	645	Myrmen
Harpia	14	3, 400	2014-02-12	645	Phiert
Harpia	14	3, 400	2014-02-12	645	Piomen
Harpia	14	3, 400	2014-02-12	645	Pipchl
Harpia	14	3, 400	2014-02-12	645	Schleu
Harpia	14	3, 400	2014-02-12	645	Thaard
Harpia	14	3, 400	2014-02-12	645	Thacae
Harpia	14	3, 400	2014-02-12	645	Tolass
Harpia	14	3, 400	2014-02-12	645	Unk
Harpia	14	3, 400	2014-02-12	645	Unk
Harpia	14	3, 400	2014-02-12	645	Unk
Harpia	14	3, 400	2014-02-12	700	Geomon
Harpia	14	3, 400	2014-02-12	700	Glyspi
Harpia	14	3, 400	2014-02-12	700	Hyloch
Harpia	14	3, 400	2014-02-12	700	Liotho
Harpia	14	3, 400	2014-02-12	700	Myrlon
Harpia	14	3, 400	2014-02-12	700	Myrmyo
Harpia	14	3, 400	2014-02-12	700	Rammel
Harpia	14	3, 400	2014-02-12	700	Schleu
Harpia	14	3, 400	2014-02-12	700	Thaard
Harpia	14	3, 400	2014-02-12	700	Thacae
Harpia	14	3, 400	2014-02-12	700	Thasch
Harpia	14	3, 400	2014-02-12	700	Tolass
Harpia	14	3, 400	2014-02-12	700	Unk
Harpia	14	3, 400	2014-02-12	700	Unk
Harpia	14	3, 400	2014-02-12	700	Unk
Harpia	14	3, 400	2014-02-12	700	Xipgut
Harpia	14	3, 400	2014-02-12	715	Amafar
Harpia	14	3, 400	2014-02-12	715	Cercin
Harpia	14	3, 400	2014-02-12	715	Geomon
Harpia	14	3, 400	2014-02-12	715	Glyspi
Harpia	14	3, 400	2014-02-12	715	Hyloch
Harpia	14	3, 400	2014-02-12	715	Liotho
Harpia	14	3, 400	2014-02-12	715	Myrlon
Harpia	14	3, 400	2014-02-12	715	Pipchl
Harpia	14	3, 400	2014-02-12	715	Rammel
Harpia	14	3, 400	2014-02-12	715	Thaard
Harpia	14	3, 400	2014-02-12	715	Thacae
Harpia	14	3, 400	2014-02-12	715	Thasch
Harpia	14	3, 400	2014-02-12	715	Trovir
Harpia	14	3, 400	2014-02-12	715	Unk
Harpia	14	3, 400	2014-02-12	715	Unk
Harpia	14	3, 400	2014-02-12	715	Unk
Harpia	14	3, 400	2014-02-12	730	Amafar
Harpia	14	3, 400	2014-02-12	730	Camrub
Harpia	14	3, 400	2014-02-12	730	Cercin
Harpia	14	3, 400	2014-02-12	730	Geomon
Harpia	14	3, 400	2014-02-12	730	Hyloch
Harpia	14	3, 400	2014-02-12	730	Liotho
Harpia	14	3, 400	2014-02-12	730	Miccin
Harpia	14	3, 400	2014-02-12	730	Myraxi
Harpia	14	3, 400	2014-02-12	730	Pipchl
Harpia	14	3, 400	2014-02-12	730	Rammel
Harpia	14	3, 400	2014-02-12	730	Thacae
Harpia	14	3, 400	2014-02-12	730	Thasch
Harpia	14	3, 400	2014-02-12	730	Tolass
Harpia	14	3, 400	2014-02-12	730	Unk
Harpia	14	3, 400	2014-02-12	730	Unk
Harpia	14	3, 400	2014-02-12	730	Unk
Harpia	14	3, 400	2014-02-12	730	Xipgut
Harpia	14	3, 400	2014-02-12	745	Brocya
Harpia	14	3, 400	2014-02-12	745	Cammel
Harpia	14	3, 400	2014-02-12	745	Capnig
Harpia	14	3, 400	2014-02-12	745	Cercin
Harpia	14	3, 400	2014-02-12	745	Colsub
Harpia	14	3, 400	2014-02-12	745	Cryvar
Harpia	14	3, 400	2014-02-12	745	Geomon
Harpia	14	3, 400	2014-02-12	745	Hyloch
Harpia	14	3, 400	2014-02-12	745	Myraxi
Harpia	14	3, 400	2014-02-12	745	Myrlon
Harpia	14	3, 400	2014-02-12	745	Piomel
Harpia	14	3, 400	2014-02-12	745	Rammel
Harpia	14	3, 400	2014-02-12	745	Thaard
Harpia	14	3, 400	2014-02-12	745	Thacae
Harpia	14	3, 400	2014-02-12	745	Tingut
Harpia	14	3, 400	2014-02-12	745	Tolass
Harpia	14	3, 400	2014-02-12	745	Unk
Harpia	14	3, 400	2014-02-12	745	Unk
Harpia	14	3, 400	2014-02-12	745	Unk
Harpia	14	3, 400	2014-02-12	745	Unk
Harpia	14	3, 400	2014-02-12	745	Unk
Harpia	14	3, 400	2014-02-12	745	Xipgut
Harpia	14	3, 400	2014-02-12	800	Brocya
Harpia	14	3, 400	2014-02-12	800	Cammel
Harpia	14	3, 400	2014-02-12	800	Cammel
Harpia	14	3, 400	2014-02-12	800	Cercin
Harpia	14	3, 400	2014-02-12	800	Colplu
Harpia	14	3, 400	2014-02-12	800	Cyavio
Harpia	14	3, 400	2014-02-12	800	Eupxan
Harpia	14	3, 400	2014-02-12	800	Liotho
Harpia	14	3, 400	2014-02-12	800	Myraxi
Harpia	14	3, 400	2014-02-12	800	Myrery
Harpia	14	3, 400	2014-02-12	800	Myrlon
Harpia	14	3, 400	2014-02-12	800	Myrmen
Harpia	14	3, 400	2014-02-12	800	Phiert
Harpia	14	3, 400	2014-02-12	800	Pipchl
Harpia	14	3, 400	2014-02-12	800	Rammel
Harpia	14	3, 400	2014-02-12	800	Thacae
Harpia	14	3, 400	2014-02-12	800	Thasch
Harpia	14	3, 400	2014-02-12	800	Tolass
Harpia	14	3, 400	2014-02-12	800	Trovir
Harpia	14	3, 400	2014-02-12	800	Unk
Harpia	14	3, -50	2014-02-05	545	Abucum
Harpia	14	3, -50	2014-02-05	545	Nycgri
Harpia	14	3, -50	2014-02-05	545	Otuwat
Harpia	14	3, -50	2014-02-05	600	Aramac
Harpia	14	3, -50	2014-02-05	600	Cryvar
Harpia	14	3, -50	2014-02-05	600	Freund
Harpia	14	3, -50	2014-02-05	600	Mitsal
Harpia	14	3, -50	2014-02-05	600	Otuwat
Harpia	14	3, -50	2014-02-05	600	Thamur
Harpia	14	3, -50	2014-02-05	600	Tingut
Harpia	14	3, -50	2014-02-05	600	Unk
Harpia	14	3, -50	2014-02-05	600	Xipgut
Harpia	14	3, -50	2014-02-05	615	Cercin
Harpia	14	3, -50	2014-02-05	615	Freund
Harpia	14	3, -50	2014-02-05	615	Henleu
Harpia	14	3, -50	2014-02-05	615	Hylsub
Harpia	14	3, -50	2014-02-05	615	Hypcan
Harpia	14	3, -50	2014-02-05	615	Pitgro
Harpia	14	3, -50	2014-02-05	615	Thamur
Harpia	14	3, -50	2014-02-05	615	Tingut
Harpia	14	3, -50	2014-02-05	615	Unk
Harpia	14	3, -50	2014-02-05	615	Xipgut
Harpia	14	3, -50	2014-02-05	630	Aramac
Harpia	14	3, -50	2014-02-05	630	Cammel
Harpia	14	3, -50	2014-02-05	630	Capnig
Harpia	14	3, -50	2014-02-05	630	Freund
Harpia	14	3, -50	2014-02-05	630	Geomon
Harpia	14	3, -50	2014-02-05	630	Henleu
Harpia	14	3, -50	2014-02-05	630	Pitgro
Harpia	14	3, -50	2014-02-05	630	Thamur
Harpia	14	3, -50	2014-02-05	630	Tingut
Harpia	14	3, -50	2014-02-05	630	Xipgut
Harpia	14	3, -50	2014-02-05	645	Amafar
Harpia	14	3, -50	2014-02-05	645	Aramac
Harpia	14	3, -50	2014-02-05	645	Barmar
Harpia	14	3, -50	2014-02-05	645	Cammel
Harpia	14	3, -50	2014-02-05	645	Cercin
Harpia	14	3, -50	2014-02-05	645	Colplu
Harpia	14	3, -50	2014-02-05	645	Freund
Harpia	14	3, -50	2014-02-05	645	Geomon
Harpia	14	3, -50	2014-02-05	645	Henleu
Harpia	14	3, -50	2014-02-05	645	Hylsub
Harpia	14	3, -50	2014-02-05	645	Myrmyo
Harpia	14	3, -50	2014-02-05	645	Pipchl
Harpia	14	3, -50	2014-02-05	645	Pitgro
Harpia	14	3, -50	2014-02-05	645	Schleu
Harpia	14	3, -50	2014-02-05	645	Sclcau
Harpia	14	3, -50	2014-02-05	645	Thamur
Harpia	14	3, -50	2014-02-05	645	Tingut
Harpia	14	3, -50	2014-02-05	645	Unk
Harpia	14	3, -50	2014-02-05	645	Unk
Harpia	14	3, -50	2014-02-05	645	Xipgut
Harpia	14	3, -50	2014-02-05	700	Amafar
Harpia	14	3, -50	2014-02-05	700	Cammel
Harpia	14	3, -50	2014-02-05	700	Capnig
Harpia	14	3, -50	2014-02-05	700	Cercin
Harpia	14	3, -50	2014-02-05	700	Colplu
Harpia	14	3, -50	2014-02-05	700	Cymlin
Harpia	14	3, -50	2014-02-05	700	Geomon
Harpia	14	3, -50	2014-02-05	700	Henleu
Harpia	14	3, -50	2014-02-05	700	Monmor
Harpia	14	3, -50	2014-02-05	700	Myrmyo
Harpia	14	3, -50	2014-02-05	700	Pipchl
Harpia	14	3, -50	2014-02-05	700	Ramtuc
Harpia	14	3, -50	2014-02-05	700	Thamur
Harpia	14	3, -50	2014-02-05	700	Tingut
Harpia	14	3, -50	2014-02-05	700	Unk
Harpia	14	3, -50	2014-02-05	715	Amaama
Harpia	14	3, -50	2014-02-05	715	Amafar
Harpia	14	3, -50	2014-02-05	715	Cammel
Harpia	14	3, -50	2014-02-05	715	Capnig
Harpia	14	3, -50	2014-02-05	715	Cercin
Harpia	14	3, -50	2014-02-05	715	Chipar
Harpia	14	3, -50	2014-02-05	715	Colplu
Harpia	14	3, -50	2014-02-05	715	Cymlin
Harpia	14	3, -50	2014-02-05	715	Geomon
Harpia	14	3, -50	2014-02-05	715	Henleu
Harpia	14	3, -50	2014-02-05	715	Hylsub
Harpia	14	3, -50	2014-02-05	715	Quepur
Harpia	14	3, -50	2014-02-05	715	Ramvit
Harpia	14	3, -50	2014-02-05	715	Thamur
Harpia	14	3, -50	2014-02-05	715	Thasch
Harpia	14	3, -50	2014-02-05	715	Thrcor
Harpia	14	3, -50	2014-02-05	715	Tingut
Harpia	14	3, -50	2014-02-05	715	Xipgut
Harpia	14	3, -50	2014-02-05	730	Amafar
Harpia	14	3, -50	2014-02-05	730	Aramac
Harpia	14	3, -50	2014-02-05	730	Cammel
Harpia	14	3, -50	2014-02-05	730	Capnig
Harpia	14	3, -50	2014-02-05	730	Cercin
Harpia	14	3, -50	2014-02-05	730	Colplu
Harpia	14	3, -50	2014-02-05	730	Freund
Harpia	14	3, -50	2014-02-05	730	Geomon
Harpia	14	3, -50	2014-02-05	730	Henleu
Harpia	14	3, -50	2014-02-05	730	Ramtuc
Harpia	14	3, -50	2014-02-05	730	Terery
Harpia	14	3, -50	2014-02-05	730	Thamur
Harpia	14	3, -50	2014-02-05	730	Thrcor
Harpia	14	3, -50	2014-02-05	730	Unk
Harpia	14	3, -50	2014-02-05	730	Unk
Harpia	14	3, -50	2014-02-05	730	Unk
Harpia	14	3, -50	2014-02-05	745	Capnig
Harpia	14	3, -50	2014-02-05	745	Cercin
Harpia	14	3, -50	2014-02-05	745	Colplu
Harpia	14	3, -50	2014-02-05	745	Freund
Harpia	14	3, -50	2014-02-05	745	Geomon
Harpia	14	3, -50	2014-02-05	745	Henleu
Harpia	14	3, -50	2014-02-05	745	Myrfor
Harpia	14	3, -50	2014-02-05	745	Phiert
Harpia	14	3, -50	2014-02-05	745	Pitgro
Harpia	14	3, -50	2014-02-05	745	Ramtuc
Harpia	14	3, -50	2014-02-05	745	Schleu
Harpia	14	3, -50	2014-02-05	745	Thamur
Harpia	14	3, -50	2014-02-05	745	Thrcor
Harpia	14	3, -50	2014-02-05	745	Trovir
Harpia	14	3, -50	2014-02-05	745	Unk
Harpia	14	3, -50	2014-02-05	745	Unk
Harpia	14	3, -50	2014-02-05	800	Amafar
Harpia	14	3, -50	2014-02-05	800	Cercin
Harpia	14	3, -50	2014-02-05	800	Colplu
Harpia	14	3, -50	2014-02-05	800	Freund
Harpia	14	3, -50	2014-02-05	800	Geomon
Harpia	14	3, -50	2014-02-05	800	Myrfor
Harpia	14	3, -50	2014-02-05	800	Myrmyo
Harpia	14	3, -50	2014-02-05	800	Phiert
Harpia	14	3, -50	2014-02-05	800	Ramtuc
Harpia	14	3, -50	2014-02-05	800	Schleu
Harpia	14	3, -50	2014-02-05	800	Thamur
Harpia	14	3, -50	2014-02-05	800	Thrcor
Harpia	14	3, -50	2014-02-05	800	Turalb
Harpia	14	3, -50	2014-02-05	800	Unk
Harpia	14	3, -50	2014-02-05	800	Unk
Harpia	14	3, 800	2014-02-16	545	Geomon
Harpia	14	3, 800	2014-02-16	545	Micgil
Harpia	14	3, 800	2014-02-16	545	Mommom
Harpia	14	3, 800	2014-02-16	545	Otuwat
Harpia	14	3, 800	2014-02-16	545	Unk
Harpia	14	3, 800	2014-02-16	600	Buccap
Harpia	14	3, 800	2014-02-16	600	Capnig
Harpia	14	3, 800	2014-02-16	600	Denruf
Harpia	14	3, 800	2014-02-16	600	Eupxan
Harpia	14	3, 800	2014-02-16	600	Liotho
Harpia	14	3, 800	2014-02-16	600	Myigai
Harpia	14	3, 800	2014-02-16	600	Myrcam
Harpia	14	3, 800	2014-02-16	600	Piomel
Harpia	14	3, 800	2014-02-16	600	Pitgro
Harpia	14	3, 800	2014-02-16	600	Thamur
Harpia	14	3, 800	2014-02-16	600	Unk
Harpia	14	3, 800	2014-02-16	600	Unk
Harpia	14	3, 800	2014-02-16	600	Unk
Harpia	14	3, 800	2014-02-16	600	Unk
Harpia	14	3, 800	2014-02-16	600	Xipgut
Harpia	14	3, 800	2014-02-16	615	Chipar
Harpia	14	3, 800	2014-02-16	615	Cryvar
Harpia	14	3, 800	2014-02-16	615	Denruf
Harpia	14	3, 800	2014-02-16	615	Geomon
Harpia	14	3, 800	2014-02-16	615	Liotho
Harpia	14	3, 800	2014-02-16	615	Myrcam
Harpia	14	3, 800	2014-02-16	615	Myrfor
Harpia	14	3, 800	2014-02-16	615	Phiert
Harpia	14	3, 800	2014-02-16	615	Pitgro
Harpia	14	3, 800	2014-02-16	615	Thamur
Harpia	14	3, 800	2014-02-16	615	Thrcor
Harpia	14	3, 800	2014-02-16	615	Tolass
Harpia	14	3, 800	2014-02-16	615	Xipgut
Harpia	14	3, 800	2014-02-16	630	Brocya
Harpia	14	3, 800	2014-02-16	630	Celgra
Harpia	14	3, 800	2014-02-16	630	Chipar
Harpia	14	3, 800	2014-02-16	630	Cryvar
Harpia	14	3, 800	2014-02-16	630	Geomon
Harpia	14	3, 800	2014-02-16	630	Liotho
Harpia	14	3, 800	2014-02-16	630	Myrcam
Harpia	14	3, 800	2014-02-16	630	Pipchl
Harpia	14	3, 800	2014-02-16	630	Pitgro
Harpia	14	3, 800	2014-02-16	630	Thamur
Harpia	14	3, 800	2014-02-16	630	Tolass
Harpia	14	3, 800	2014-02-16	630	Unk
Harpia	14	3, 800	2014-02-16	630	Xipgut
Harpia	14	3, 800	2014-02-16	645	Capnig
Harpia	14	3, 800	2014-02-16	645	Celgra
Harpia	14	3, 800	2014-02-16	645	Cercin
Harpia	14	3, 800	2014-02-16	645	Chipar
Harpia	14	3, 800	2014-02-16	645	Geomon
Harpia	14	3, 800	2014-02-16	645	Habrub
Harpia	14	3, 800	2014-02-16	645	Hylpoe
Harpia	14	3, 800	2014-02-16	645	Liotho
Harpia	14	3, 800	2014-02-16	645	Myrcam
Harpia	14	3, 800	2014-02-16	645	Nonbru
Harpia	14	3, 800	2014-02-16	645	Thamur
Harpia	14	3, 800	2014-02-16	645	Unk
Harpia	14	3, 800	2014-02-16	700	Amafar
Harpia	14	3, 800	2014-02-16	700	Capnig
Harpia	14	3, 800	2014-02-16	700	Celgra
Harpia	14	3, 800	2014-02-16	700	Cercin
Harpia	14	3, 800	2014-02-16	700	Colplu
Harpia	14	3, 800	2014-02-16	700	Eupxan
Harpia	14	3, 800	2014-02-16	700	Forcol
Harpia	14	3, 800	2014-02-16	700	Geomon
Harpia	14	3, 800	2014-02-16	700	Hyloch
Harpia	14	3, 800	2014-02-16	700	Myrcam
Harpia	14	3, 800	2014-02-16	700	Nonbru
Harpia	14	3, 800	2014-02-16	700	Pitgro
Harpia	14	3, 800	2014-02-16	700	Ramtuc
Harpia	14	3, 800	2014-02-16	700	Thamur
Harpia	14	3, 800	2014-02-16	700	Thrcor
Harpia	14	3, 800	2014-02-16	700	Tromel
Harpia	14	3, 800	2014-02-16	700	Unk
Harpia	14	3, 800	2014-02-16	715	Brocya
Harpia	14	3, 800	2014-02-16	715	Capnig
Harpia	14	3, 800	2014-02-16	715	Cercin
Harpia	14	3, 800	2014-02-16	715	Geomon
Harpia	14	3, 800	2014-02-16	715	Hyloch
Harpia	14	3, 800	2014-02-16	715	Myrmyo
Harpia	14	3, 800	2014-02-16	715	Nonbru
Harpia	14	3, 800	2014-02-16	715	Ramtuc
Harpia	14	3, 800	2014-02-16	715	Thamur
Harpia	14	3, 800	2014-02-16	730	Aramac
Harpia	14	3, 800	2014-02-16	730	Capnig
Harpia	14	3, 800	2014-02-16	730	Cercin
Harpia	14	3, 800	2014-02-16	730	Geomon
Harpia	14	3, 800	2014-02-16	730	Hylnae
Harpia	14	3, 800	2014-02-16	730	Hyloch
Harpia	14	3, 800	2014-02-16	730	Myrcam
Harpia	14	3, 800	2014-02-16	730	Myrmyo
Harpia	14	3, 800	2014-02-16	730	Piacay
Harpia	14	3, 800	2014-02-16	730	Piomel
Harpia	14	3, 800	2014-02-16	730	Ramtuc
Harpia	14	3, 800	2014-02-16	730	Schmaj
Harpia	14	3, 800	2014-02-16	730	Thamur
Harpia	14	3, 800	2014-02-16	730	Thrcor
Harpia	14	3, 800	2014-02-16	745	Cammel
Harpia	14	3, 800	2014-02-16	745	Capnig
Harpia	14	3, 800	2014-02-16	745	Cercin
Harpia	14	3, 800	2014-02-16	745	Colplu
Harpia	14	3, 800	2014-02-16	745	Eupxan
Harpia	14	3, 800	2014-02-16	745	Geomon
Harpia	14	3, 800	2014-02-16	745	Hyloch
Harpia	14	3, 800	2014-02-16	745	Mitsal
Harpia	14	3, 800	2014-02-16	745	Nonbru
Harpia	14	3, 800	2014-02-16	745	Phiert
Harpia	14	3, 800	2014-02-16	745	Piomel
Harpia	14	3, 800	2014-02-16	745	Thamur
Harpia	14	3, 800	2014-02-16	745	Tolass
Harpia	14	3, 800	2014-02-16	800	Amafar
Harpia	14	3, 800	2014-02-16	800	Brocya
Harpia	14	3, 800	2014-02-16	800	Cammel
Harpia	14	3, 800	2014-02-16	800	Capnig
Harpia	14	3, 800	2014-02-16	800	Cerser
Harpia	14	3, 800	2014-02-16	800	Chipar
Harpia	14	3, 800	2014-02-16	800	Colplu
Harpia	14	3, 800	2014-02-16	800	Cymlin
Harpia	14	3, 800	2014-02-16	800	Geomon
Harpia	14	3, 800	2014-02-16	800	Hylpoe
Harpia	14	3, 800	2014-02-16	800	Nonbru
Harpia	14	3, 800	2014-02-16	800	Phiert
Harpia	14	3, 800	2014-02-16	800	Piomel
Harpia	14	3, 800	2014-02-16	800	Pipchl
Harpia	14	3, 800	2014-02-16	800	Thamur
Harpia	14	3, 800	2014-02-16	800	Tolass
Harpia	14	3, 800	2014-02-16	800	Tromel
Harpia	14	3, 800	2014-02-16	800	Troruf
Harpia	14	4, 200	2014-02-07	545	Lopcri
Harpia	14	4, 200	2014-02-07	545	Nycaet
Harpia	14	4, 200	2014-02-07	545	Nycgri
Harpia	14	4, 200	2014-02-07	545	Otuwat
Harpia	14	4, 200	2014-02-07	545	Unk
Harpia	14	4, 200	2014-02-07	600	Atispa
Harpia	14	4, 200	2014-02-07	600	Dapame
Harpia	14	4, 200	2014-02-07	600	Liotho
Harpia	14	4, 200	2014-02-07	600	Myrfor
Harpia	14	4, 200	2014-02-07	600	Phiert
Harpia	14	4, 200	2014-02-07	600	Thamur
Harpia	14	4, 200	2014-02-07	600	Tyrsto
Harpia	14	4, 200	2014-02-07	600	Xipgut
Harpia	14	4, 200	2014-02-07	615	Atispa
Harpia	14	4, 200	2014-02-07	615	Capnig
Harpia	14	4, 200	2014-02-07	615	Colplu
Harpia	14	4, 200	2014-02-07	615	Geomon
Harpia	14	4, 200	2014-02-07	615	Hylpoe
Harpia	14	4, 200	2014-02-07	615	Liotho
Harpia	14	4, 200	2014-02-07	615	Phiert
Harpia	14	4, 200	2014-02-07	615	Piomel
Harpia	14	4, 200	2014-02-07	615	Quepur
Harpia	14	4, 200	2014-02-07	615	Tingut
Harpia	14	4, 200	2014-02-07	615	Troruf
Harpia	14	4, 200	2014-02-07	615	Tyrsto
Harpia	14	4, 200	2014-02-07	615	Unk
Harpia	14	4, 200	2014-02-07	615	Unk
Harpia	14	4, 200	2014-02-07	615	Xipgut
Harpia	14	4, 200	2014-02-07	630	Atispa
Harpia	14	4, 200	2014-02-07	630	Capnig
Harpia	14	4, 200	2014-02-07	630	Cryvar
Harpia	14	4, 200	2014-02-07	630	Henleu
Harpia	14	4, 200	2014-02-07	630	Liotho
Harpia	14	4, 200	2014-02-07	630	Myrmyo
Harpia	14	4, 200	2014-02-07	630	Phiert
Harpia	14	4, 200	2014-02-07	630	Quepur
Harpia	14	4, 200	2014-02-07	630	Thamur
Harpia	14	4, 200	2014-02-07	630	Tingut
Harpia	14	4, 200	2014-02-07	630	Troruf
Harpia	14	4, 200	2014-02-07	630	Tyrsto
Harpia	14	4, 200	2014-02-07	630	Unk
Harpia	14	4, 200	2014-02-07	630	Unk	Thrcor?
Harpia	14	4, 200	2014-02-07	645	Cammel
Harpia	14	4, 200	2014-02-07	645	Capnig
Harpia	14	4, 200	2014-02-07	645	Cercin
Harpia	14	4, 200	2014-02-07	645	Cercin
Harpia	14	4, 200	2014-02-07	645	Geomon
Harpia	14	4, 200	2014-02-07	645	Liotho
Harpia	14	4, 200	2014-02-07	645	Myrmyo
Harpia	14	4, 200	2014-02-07	645	Nonbru
Harpia	14	4, 200	2014-02-07	645	Phiert
Harpia	14	4, 200	2014-02-07	645	Pipchl
Harpia	14	4, 200	2014-02-07	645	Thacae
Harpia	14	4, 200	2014-02-07	645	Thasch
Harpia	14	4, 200	2014-02-07	645	Tingut
Harpia	14	4, 200	2014-02-07	645	Tyrsto
Harpia	14	4, 200	2014-02-07	645	Unk
Harpia	14	4, 200	2014-02-07	645	Xipgut
Harpia	14	4, 200	2014-02-07	700	Autmel
Harpia	14	4, 200	2014-02-07	700	Capnig
Harpia	14	4, 200	2014-02-07	700	Capnig
Harpia	14	4, 200	2014-02-07	700	Cercin
Harpia	14	4, 200	2014-02-07	700	Geomon
Harpia	14	4, 200	2014-02-07	700	Liotho
Harpia	14	4, 200	2014-02-07	700	Miccin
Harpia	14	4, 200	2014-02-07	700	Myrmyo
Harpia	14	4, 200	2014-02-07	700	Piomel
Harpia	14	4, 200	2014-02-07	700	Pipchl
Harpia	14	4, 200	2014-02-07	700	Pitgro
Harpia	14	4, 200	2014-02-07	700	Ramvit
Harpia	14	4, 200	2014-02-07	700	Tingut
Harpia	14	4, 200	2014-02-07	700	Tyrsto
Harpia	14	4, 200	2014-02-07	700	Unk
Harpia	14	4, 200	2014-02-07	700	Xipgut
Harpia	14	4, 200	2014-02-07	715	Amafar
Harpia	14	4, 200	2014-02-07	715	Aramac
Harpia	14	4, 200	2014-02-07	715	Brocya
Harpia	14	4, 200	2014-02-07	715	Cercin
Harpia	14	4, 200	2014-02-07	715	Geomon
Harpia	14	4, 200	2014-02-07	715	Glyspi
Harpia	14	4, 200	2014-02-07	715	Glyspi
Harpia	14	4, 200	2014-02-07	715	Hyloch
Harpia	14	4, 200	2014-02-07	715	Liotho
Harpia	14	4, 200	2014-02-07	715	Lipvoc
Harpia	14	4, 200	2014-02-07	715	Myrmyo
Harpia	14	4, 200	2014-02-07	715	Pipchl
Harpia	14	4, 200	2014-02-07	715	Thamur
Harpia	14	4, 200	2014-02-07	715	Tingut
Harpia	14	4, 200	2014-02-07	715	Tyrsto
Harpia	14	4, 200	2014-02-07	715	Unk
Harpia	14	4, 200	2014-02-07	715	Unk
Harpia	14	4, 200	2014-02-07	715	Unk
Harpia	14	4, 200	2014-02-07	715	Xipgut
Harpia	14	4, 200	2014-02-07	730	Abucum
Harpia	14	4, 200	2014-02-07	730	Brocya
Harpia	14	4, 200	2014-02-07	730	Capnig
Harpia	14	4, 200	2014-02-07	730	Celele
Harpia	14	4, 200	2014-02-07	730	Cercin
Harpia	14	4, 200	2014-02-07	730	Cercin
Harpia	14	4, 200	2014-02-07	730	Geomon
Harpia	14	4, 200	2014-02-07	730	Glyspi
Harpia	14	4, 200	2014-02-07	730	Hyloch
Harpia	14	4, 200	2014-02-07	730	Hypcan
Harpia	14	4, 200	2014-02-07	730	Liotho
Harpia	14	4, 200	2014-02-07	730	Lipvoc
Harpia	14	4, 200	2014-02-07	730	Micmar
Harpia	14	4, 200	2014-02-07	730	Myrmyo
Harpia	14	4, 200	2014-02-07	730	Ramtuc
Harpia	14	4, 200	2014-02-07	730	Thrcor
Harpia	14	4, 200	2014-02-07	730	Unk
Harpia	14	4, 200	2014-02-07	730	Unk
Harpia	14	4, 200	2014-02-07	730	Xipgut
Harpia	14	4, 200	2014-02-07	745	Aramac
Harpia	14	4, 200	2014-02-07	745	Brocya
Harpia	14	4, 200	2014-02-07	745	Capnig
Harpia	14	4, 200	2014-02-07	745	Cercin
Harpia	14	4, 200	2014-02-07	745	Colplu
Harpia	14	4, 200	2014-02-07	745	Drylin
Harpia	14	4, 200	2014-02-07	745	Geomon
Harpia	14	4, 200	2014-02-07	745	Glyspi
Harpia	14	4, 200	2014-02-07	745	Hylpoe
Harpia	14	4, 200	2014-02-07	745	Hypcan
Harpia	14	4, 200	2014-02-07	745	Liotho
Harpia	14	4, 200	2014-02-07	745	Lipvoc
Harpia	14	4, 200	2014-02-07	745	Myrmyo
Harpia	14	4, 200	2014-02-07	745	Ramvit
Harpia	14	4, 200	2014-02-07	745	Thasch
Harpia	14	4, 200	2014-02-07	745	Tingut
Harpia	14	4, 200	2014-02-07	745	Tyrsto
Harpia	14	4, 200	2014-02-07	745	Unk	like jay
Harpia	14	4, 200	2014-02-07	800	Amafar
Harpia	14	4, 200	2014-02-07	800	Arasev
Harpia	14	4, 200	2014-02-07	800	Capnig
Harpia	14	4, 200	2014-02-07	800	Celele
Harpia	14	4, 200	2014-02-07	800	Cercin
Harpia	14	4, 200	2014-02-07	800	Colplu
Harpia	14	4, 200	2014-02-07	800	Geomon
Harpia	14	4, 200	2014-02-07	800	Glyspi
Harpia	14	4, 200	2014-02-07	800	Hypcan
Harpia	14	4, 200	2014-02-07	800	Liotho
Harpia	14	4, 200	2014-02-07	800	Lipvoc
Harpia	14	4, 200	2014-02-07	800	Myrmyo
Harpia	14	4, 200	2014-02-07	800	Ramtuc
Harpia	14	4, 200	2014-02-07	800	Thasch
Harpia	14	4, 200	2014-02-07	800	Turlaw
Harpia	14	4, 200	2014-02-07	800	Tyrsto
Harpia	14	4, 200	2014-02-07	800	Unk	antbird	very regular
Harpia	14	4, 200	2014-02-07	800	Unk
Harpia	14	4, 600	2014-02-14	545	Abucum
Harpia	14	4, 600	2014-02-14	545	Barmar
Harpia	14	4, 600	2014-02-14	545	Cichuh
Harpia	14	4, 600	2014-02-14	545	Geomon
Harpia	14	4, 600	2014-02-14	545	Turalb
Harpia	14	4, 600	2014-02-14	600	Atispa
Harpia	14	4, 600	2014-02-14	600	Geosap
Harpia	14	4, 600	2014-02-14	600	Glyspi
Harpia	14	4, 600	2014-02-14	600	Hylpoe
Harpia	14	4, 600	2014-02-14	600	Liotho
Harpia	14	4, 600	2014-02-14	600	Myrcam
Harpia	14	4, 600	2014-02-14	600	Xipgut
Harpia	14	4, 600	2014-02-14	615	Amafar
Harpia	14	4, 600	2014-02-14	615	Atispa
Harpia	14	4, 600	2014-02-14	615	Celgra
Harpia	14	4, 600	2014-02-14	615	Chipar
Harpia	14	4, 600	2014-02-14	615	Cryvar
Harpia	14	4, 600	2014-02-14	615	Geomon
Harpia	14	4, 600	2014-02-14	615	Glyspi
Harpia	14	4, 600	2014-02-14	615	Hemzos
Harpia	14	4, 600	2014-02-14	615	Hypcan
Harpia	14	4, 600	2014-02-14	615	Myrbra
Harpia	14	4, 600	2014-02-14	615	Ramtuc
Harpia	14	4, 600	2014-02-14	615	Thaard
Harpia	14	4, 600	2014-02-14	615	Thamur
Harpia	14	4, 600	2014-02-14	615	Tolass
Harpia	14	4, 600	2014-02-14	615	Turalb
Harpia	14	4, 600	2014-02-14	615	Turlaw
Harpia	14	4, 600	2014-02-14	615	Unk
Harpia	14	4, 600	2014-02-14	615	Xipgut
Harpia	14	4, 600	2014-02-14	630	Amafar
Harpia	14	4, 600	2014-02-14	630	Atispa
Harpia	14	4, 600	2014-02-14	630	Brocya
Harpia	14	4, 600	2014-02-14	630	Camtur
Harpia	14	4, 600	2014-02-14	630	Celgra
Harpia	14	4, 600	2014-02-14	630	Chipar
Harpia	14	4, 600	2014-02-14	630	Geomon
Harpia	14	4, 600	2014-02-14	630	Glyspi
Harpia	14	4, 600	2014-02-14	630	Hyloch
Harpia	14	4, 600	2014-02-14	630	Myraxi
Harpia	14	4, 600	2014-02-14	630	Myrcam
Harpia	14	4, 600	2014-02-14	630	Myrmyo
Harpia	14	4, 600	2014-02-14	630	Pipchl
Harpia	14	4, 600	2014-02-14	630	Psaang
Harpia	14	4, 600	2014-02-14	630	Sclruf
Harpia	14	4, 600	2014-02-14	630	Tolass
Harpia	14	4, 600	2014-02-14	630	Turalb
Harpia	14	4, 600	2014-02-14	630	Xipgut
Harpia	14	4, 600	2014-02-14	645	Amafar
Harpia	14	4, 600	2014-02-14	645	Atispa
Harpia	14	4, 600	2014-02-14	645	Geomon
Harpia	14	4, 600	2014-02-14	645	Hyloch
Harpia	14	4, 600	2014-02-14	645	Liotho
Harpia	14	4, 600	2014-02-14	645	Micmar
Harpia	14	4, 600	2014-02-14	645	Myigai
Harpia	14	4, 600	2014-02-14	645	Pygste
Harpia	14	4, 600	2014-02-14	645	Thamur
Harpia	14	4, 600	2014-02-14	645	Thasch
Harpia	14	4, 600	2014-02-14	645	Tolass
Harpia	14	4, 600	2014-02-14	645	Turalb
Harpia	14	4, 600	2014-02-14	645	Unk
Harpia	14	4, 600	2014-02-14	700	Capnig
Harpia	14	4, 600	2014-02-14	700	Cymlin
Harpia	14	4, 600	2014-02-14	700	Geomon
Harpia	14	4, 600	2014-02-14	700	Hyloch
Harpia	14	4, 600	2014-02-14	700	Hyloch
Harpia	14	4, 600	2014-02-14	700	Legleu
Harpia	14	4, 600	2014-02-14	700	Liotho
Harpia	14	4, 600	2014-02-14	700	Miccin
Harpia	14	4, 600	2014-02-14	700	Myigai
Harpia	14	4, 600	2014-02-14	700	Myrbra
Harpia	14	4, 600	2014-02-14	700	Myrcam
Harpia	14	4, 600	2014-02-14	700	Myrlon
Harpia	14	4, 600	2014-02-14	700	Thaard
Harpia	14	4, 600	2014-02-14	700	Thacae
Harpia	14	4, 600	2014-02-14	700	Thamur
Harpia	14	4, 600	2014-02-14	700	Tolass
Harpia	14	4, 600	2014-02-14	700	Troruf
Harpia	14	4, 600	2014-02-14	700	Trovir
Harpia	14	4, 600	2014-02-14	700	Turalb
Harpia	14	4, 600	2014-02-14	700	Unk
Harpia	14	4, 600	2014-02-14	715	Atispa
Harpia	14	4, 600	2014-02-14	715	Capnig
Harpia	14	4, 600	2014-02-14	715	Cryvar
Harpia	14	4, 600	2014-02-14	715	Dapame
Harpia	14	4, 600	2014-02-14	715	Hyloch
Harpia	14	4, 600	2014-02-14	715	Lipvoc
Harpia	14	4, 600	2014-02-14	715	Miccin
Harpia	14	4, 600	2014-02-14	715	Myrbra
Harpia	14	4, 600	2014-02-14	715	Myrlon
Harpia	14	4, 600	2014-02-14	715	Phiert
Harpia	14	4, 600	2014-02-14	715	Pitgro
Harpia	14	4, 600	2014-02-14	715	Thaard
Harpia	14	4, 600	2014-02-14	715	Thacae
Harpia	14	4, 600	2014-02-14	715	Thamur
Harpia	14	4, 600	2014-02-14	715	Trovir
Harpia	14	4, 600	2014-02-14	715	Turalb
Harpia	14	4, 600	2014-02-14	715	Unk
Harpia	14	4, 600	2014-02-14	715	Unk
Harpia	14	4, 600	2014-02-14	730	Capnig
Harpia	14	4, 600	2014-02-14	730	Cercin
Harpia	14	4, 600	2014-02-14	730	Colplu
Harpia	14	4, 600	2014-02-14	730	Cymlin
Harpia	14	4, 600	2014-02-14	730	Geomon
Harpia	14	4, 600	2014-02-14	730	Hemzos
Harpia	14	4, 600	2014-02-14	730	Hyloch
Harpia	14	4, 600	2014-02-14	730	Liotho
Harpia	14	4, 600	2014-02-14	730	Miccin
Harpia	14	4, 600	2014-02-14	730	Monmor
Harpia	14	4, 600	2014-02-14	730	Myrbra
Harpia	14	4, 600	2014-02-14	730	Myrcam
Harpia	14	4, 600	2014-02-14	730	Myrlon
Harpia	14	4, 600	2014-02-14	730	Myrmen
Harpia	14	4, 600	2014-02-14	730	Ramtuc
Harpia	14	4, 600	2014-02-14	730	Thacae
Harpia	14	4, 600	2014-02-14	730	Thamur
Harpia	14	4, 600	2014-02-14	730	Trovir
Harpia	14	4, 600	2014-02-14	745	Capnig
Harpia	14	4, 600	2014-02-14	745	Colplu
Harpia	14	4, 600	2014-02-14	745	Eupruf
Harpia	14	4, 600	2014-02-14	745	Geomon
Harpia	14	4, 600	2014-02-14	745	Glyspi
Harpia	14	4, 600	2014-02-14	745	Hylhyp
Harpia	14	4, 600	2014-02-14	745	Liotho
Harpia	14	4, 600	2014-02-14	745	Lipvoc
Harpia	14	4, 600	2014-02-14	745	Miccin
Harpia	14	4, 600	2014-02-14	745	Myrbra
Harpia	14	4, 600	2014-02-14	745	Myrbra
Harpia	14	4, 600	2014-02-14	745	Pteaza
Harpia	14	4, 600	2014-02-14	745	Pteplu
Harpia	14	4, 600	2014-02-14	745	Ramtuc
Harpia	14	4, 600	2014-02-14	745	Ramvit
Harpia	14	4, 600	2014-02-14	745	Thasch
Harpia	14	4, 600	2014-02-14	745	Trovir
Harpia	14	4, 600	2014-02-14	745	Turalb
Harpia	14	4, 600	2014-02-14	745	Unk
Harpia	14	4, 600	2014-02-14	800	Brocya
Harpia	14	4, 600	2014-02-14	800	Capnig
Harpia	14	4, 600	2014-02-14	800	Colplu
Harpia	14	4, 600	2014-02-14	800	Dapame
Harpia	14	4, 600	2014-02-14	800	Eupruf
Harpia	14	4, 600	2014-02-14	800	Geomon
Harpia	14	4, 600	2014-02-14	800	Hylhyp
Harpia	14	4, 600	2014-02-14	800	Liotho
Harpia	14	4, 600	2014-02-14	800	Myrbra
Harpia	14	4, 600	2014-02-14	800	Myrlon
Harpia	14	4, 600	2014-02-14	800	Myrmyo
Harpia	14	4, 600	2014-02-14	800	Phiert
Harpia	14	4, 600	2014-02-14	800	Piomel
Harpia	14	4, 600	2014-02-14	800	Pipchl
Harpia	14	4, 600	2014-02-14	800	Pteaza
Harpia	14	4, 600	2014-02-14	800	Pteplu
Harpia	14	4, 600	2014-02-14	800	Ramtuc
Harpia	14	4, 600	2014-02-14	800	Thasch
Harpia	14	4, 600	2014-02-14	800	Titcay
Harpia	14	4, 600	2014-02-14	800	Tolass
Harpia	14	4, 600	2014-02-14	800	Tolpol
Harpia	14	4, 600	2014-02-14	800	Trovir
Harpia	14	4, 600	2014-02-14	800	Unk
Harpia	14	5, 400	2014-02-13	545	Abucum
Harpia	14	5, 400	2014-02-13	545	Cichuh
Harpia	14	5, 400	2014-02-13	545	Cryvar
Harpia	14	5, 400	2014-02-13	545	Nycaet
Harpia	14	5, 400	2014-02-13	545	Nycoce
Harpia	14	5, 400	2014-02-13	545	Unk
Harpia	14	5, 400	2014-02-13	600	Atispa
Harpia	14	5, 400	2014-02-13	600	Capnig
Harpia	14	5, 400	2014-02-13	600	Glyspi
Harpia	14	5, 400	2014-02-13	600	Hylpoe
Harpia	14	5, 400	2014-02-13	600	Hylsub
Harpia	14	5, 400	2014-02-13	600	Liotho
Harpia	14	5, 400	2014-02-13	600	Myrcam
Harpia	14	5, 400	2014-02-13	600	Myrhau
Harpia	14	5, 400	2014-02-13	600	Thaard
Harpia	14	5, 400	2014-02-13	600	Thamur
Harpia	14	5, 400	2014-02-13	600	Tinmaj
Harpia	14	5, 400	2014-02-13	600	Unk
Harpia	14	5, 400	2014-02-13	600	Xipgut
Harpia	14	5, 400	2014-02-13	600	Xipgut
Harpia	14	5, 400	2014-02-13	615	Atispa
Harpia	14	5, 400	2014-02-13	615	Colplu
Harpia	14	5, 400	2014-02-13	615	Glyspi
Harpia	14	5, 400	2014-02-13	615	Hylpoe
Harpia	14	5, 400	2014-02-13	615	Liotho
Harpia	14	5, 400	2014-02-13	615	Myraxi
Harpia	14	5, 400	2014-02-13	615	Myrlon
Harpia	14	5, 400	2014-02-13	615	Myrmen
Harpia	14	5, 400	2014-02-13	615	Pipchl
Harpia	14	5, 400	2014-02-13	615	Thaard
Harpia	14	5, 400	2014-02-13	615	Thacae
Harpia	14	5, 400	2014-02-13	615	Tinmaj
Harpia	14	5, 400	2014-02-13	615	Unk
Harpia	14	5, 400	2014-02-13	615	Xipgut
Harpia	14	5, 400	2014-02-13	630	Atispa
Harpia	14	5, 400	2014-02-13	630	Brocya
Harpia	14	5, 400	2014-02-13	630	Capnig
Harpia	14	5, 400	2014-02-13	630	Cercin
Harpia	14	5, 400	2014-02-13	630	Freund
Harpia	14	5, 400	2014-02-13	630	Geomon
Harpia	14	5, 400	2014-02-13	630	Glyspi
Harpia	14	5, 400	2014-02-13	630	Hylpoe
Harpia	14	5, 400	2014-02-13	630	Liotho
Harpia	14	5, 400	2014-02-13	630	Lipvoc
Harpia	14	5, 400	2014-02-13	630	Myrcam
Harpia	14	5, 400	2014-02-13	630	Myrmen
Harpia	14	5, 400	2014-02-13	630	Pipchl
Harpia	14	5, 400	2014-02-13	630	Rammel
Harpia	14	5, 400	2014-02-13	630	Thaard
Harpia	14	5, 400	2014-02-13	630	Thacae
Harpia	14	5, 400	2014-02-13	630	Tinmaj
Harpia	14	5, 400	2014-02-13	630	Unk		Thaard?
Harpia	14	5, 400	2014-02-13	645	Atispa
Harpia	14	5, 400	2014-02-13	645	Brocya
Harpia	14	5, 400	2014-02-13	645	Capnig
Harpia	14	5, 400	2014-02-13	645	Cercin
Harpia	14	5, 400	2014-02-13	645	Freund
Harpia	14	5, 400	2014-02-13	645	Geomon
Harpia	14	5, 400	2014-02-13	645	Glyspi
Harpia	14	5, 400	2014-02-13	645	Hylpoe
Harpia	14	5, 400	2014-02-13	645	Liotho
Harpia	14	5, 400	2014-02-13	645	Lipvoc
Harpia	14	5, 400	2014-02-13	645	Myrcam
Harpia	14	5, 400	2014-02-13	645	Phiert
Harpia	14	5, 400	2014-02-13	645	Pipchl
Harpia	14	5, 400	2014-02-13	645	Tinmaj
Harpia	14	5, 400	2014-02-13	645	Unk
Harpia	14	5, 400	2014-02-13	700	Atispa
Harpia	14	5, 400	2014-02-13	700	Brocya
Harpia	14	5, 400	2014-02-13	700	Cammel
Harpia	14	5, 400	2014-02-13	700	Capnig
Harpia	14	5, 400	2014-02-13	700	Cercin
Harpia	14	5, 400	2014-02-13	700	Colplu
Harpia	14	5, 400	2014-02-13	700	Geomon
Harpia	14	5, 400	2014-02-13	700	Glyspi
Harpia	14	5, 400	2014-02-13	700	Hylpoe
Harpia	14	5, 400	2014-02-13	700	Hyphyp
Harpia	14	5, 400	2014-02-13	700	Liotho
Harpia	14	5, 400	2014-02-13	700	Lipvoc
Harpia	14	5, 400	2014-02-13	700	Monmor
Harpia	14	5, 400	2014-02-13	700	Myrbra
Harpia	14	5, 400	2014-02-13	700	Myrcam
Harpia	14	5, 400	2014-02-13	700	Myrlon
Harpia	14	5, 400	2014-02-13	700	Myrmen
Harpia	14	5, 400	2014-02-13	700	Thaard
Harpia	14	5, 400	2014-02-13	700	Thacae
Harpia	14	5, 400	2014-02-13	700	Thamur
Harpia	14	5, 400	2014-02-13	700	Tinmaj
Harpia	14	5, 400	2014-02-13	700	Trovir
Harpia	14	5, 400	2014-02-13	700	Tyrsto
Harpia	14	5, 400	2014-02-13	700	Unk
Harpia	14	5, 400	2014-02-13	715	Atispa
Harpia	14	5, 400	2014-02-13	715	Brocya
Harpia	14	5, 400	2014-02-13	715	Camrub
Harpia	14	5, 400	2014-02-13	715	Capnig
Harpia	14	5, 400	2014-02-13	715	Celgra
Harpia	14	5, 400	2014-02-13	715	Cercin
Harpia	14	5, 400	2014-02-13	715	Cymlin
Harpia	14	5, 400	2014-02-13	715	Geomon
Harpia	14	5, 400	2014-02-13	715	Hylpoe
Harpia	14	5, 400	2014-02-13	715	Hylsub
Harpia	14	5, 400	2014-02-13	715	Liotho
Harpia	14	5, 400	2014-02-13	715	Lipvoc
Harpia	14	5, 400	2014-02-13	715	Micmar
Harpia	14	5, 400	2014-02-13	715	Monmor
Harpia	14	5, 400	2014-02-13	715	Myrbra
Harpia	14	5, 400	2014-02-13	715	Myrlon
Harpia	14	5, 400	2014-02-13	715	Piomel
Harpia	14	5, 400	2014-02-13	715	Thacae
Harpia	14	5, 400	2014-02-13	715	Thamur
Harpia	14	5, 400	2014-02-13	715	Tinmaj
Harpia	14	5, 400	2014-02-13	715	Trovir
Harpia	14	5, 400	2014-02-13	730	Atispa
Harpia	14	5, 400	2014-02-13	730	Brocya
Harpia	14	5, 400	2014-02-13	730	Cammel
Harpia	14	5, 400	2014-02-13	730	Capnig
Harpia	14	5, 400	2014-02-13	730	Cercin
Harpia	14	5, 400	2014-02-13	730	Cymlin
Harpia	14	5, 400	2014-02-13	730	Geomon
Harpia	14	5, 400	2014-02-13	730	Glyspi
Harpia	14	5, 400	2014-02-13	730	Hylpoe
Harpia	14	5, 400	2014-02-13	730	Hylsub
Harpia	14	5, 400	2014-02-13	730	Liotho
Harpia	14	5, 400	2014-02-13	730	Lipvoc
Harpia	14	5, 400	2014-02-13	730	Myrbra
Harpia	14	5, 400	2014-02-13	730	Phiert
Harpia	14	5, 400	2014-02-13	730	Piomel
Harpia	14	5, 400	2014-02-13	730	Pitsul
Harpia	14	5, 400	2014-02-13	730	Pteplu
Harpia	14	5, 400	2014-02-13	730	Quepur
Harpia	14	5, 400	2014-02-13	730	Thamur
Harpia	14	5, 400	2014-02-13	730	Tromel
Harpia	14	5, 400	2014-02-13	730	Trovir
Harpia	14	5, 400	2014-02-13	730	Unk
Harpia	14	5, 400	2014-02-13	745	Barmar
Harpia	14	5, 400	2014-02-13	745	Brocya
Harpia	14	5, 400	2014-02-13	745	Capnig
Harpia	14	5, 400	2014-02-13	745	Celfla
Harpia	14	5, 400	2014-02-13	745	Celgra
Harpia	14	5, 400	2014-02-13	745	Cercin
Harpia	14	5, 400	2014-02-13	745	Cymlin
Harpia	14	5, 400	2014-02-13	745	Freund
Harpia	14	5, 400	2014-02-13	745	Geomon
Harpia	14	5, 400	2014-02-13	745	Glyspi
Harpia	14	5, 400	2014-02-13	745	Hylnae
Harpia	14	5, 400	2014-02-13	745	Liotho
Harpia	14	5, 400	2014-02-13	745	Melcru
Harpia	14	5, 400	2014-02-13	745	Monmor
Harpia	14	5, 400	2014-02-13	745	Myrbra
Harpia	14	5, 400	2014-02-13	745	Pitgro
Harpia	14	5, 400	2014-02-13	745	Ramtuc
Harpia	14	5, 400	2014-02-13	745	Tromel
Harpia	14	5, 400	2014-02-13	745	Trovir
Harpia	14	5, 400	2014-02-13	745	Unk
Harpia	14	5, 400	2014-02-13	800	Capnig
Harpia	14	5, 400	2014-02-13	800	Celgra
Harpia	14	5, 400	2014-02-13	800	Cercin
Harpia	14	5, 400	2014-02-13	800	Colplu
Harpia	14	5, 400	2014-02-13	800	Freund
Harpia	14	5, 400	2014-02-13	800	Geomon
Harpia	14	5, 400	2014-02-13	800	Hylnae
Harpia	14	5, 400	2014-02-13	800	Hypcan
Harpia	14	5, 400	2014-02-13	800	Liotho
Harpia	14	5, 400	2014-02-13	800	Melcru
Harpia	14	5, 400	2014-02-13	800	Micmar
Harpia	14	5, 400	2014-02-13	800	Monmor
Harpia	14	5, 400	2014-02-13	800	Piomen
Harpia	14	5, 400	2014-02-13	800	Pitgro
Harpia	14	5, 400	2014-02-13	800	Rammel
Harpia	14	5, 400	2014-02-13	800	Trovir
Harpia	14	5, 400	2014-02-13	800	Unk
Harpia	14	5, -50	2014-02-04	545	None
Harpia	14	5, -50	2014-02-04	600	Atispa
Harpia	14	5, -50	2014-02-04	600	Barmar
Harpia	14	5, -50	2014-02-04	600	Hylpoe
Harpia	14	5, -50	2014-02-04	600	Liotho
Harpia	14	5, -50	2014-02-04	600	Myraxi
Harpia	14	5, -50	2014-02-04	600	Phiert
Harpia	14	5, -50	2014-02-04	600	Ramvit
Harpia	14	5, -50	2014-02-04	600	Thasch
Harpia	14	5, -50	2014-02-04	600	Tingut
Harpia	14	5, -50	2014-02-04	600	Xipgut
Harpia	14	5, -50	2014-02-04	615	Barmar
Harpia	14	5, -50	2014-02-04	615	Cercin
Harpia	14	5, -50	2014-02-04	615	Colplu
Harpia	14	5, -50	2014-02-04	615	Geomon
Harpia	14	5, -50	2014-02-04	615	Glyspi
Harpia	14	5, -50	2014-02-04	615	Hylpoe
Harpia	14	5, -50	2014-02-04	615	Liotho
Harpia	14	5, -50	2014-02-04	615	Micgil
Harpia	14	5, -50	2014-02-04	615	Myrhau
Harpia	14	5, -50	2014-02-04	615	Phiert
Harpia	14	5, -50	2014-02-04	615	Thaard
Harpia	14	5, -50	2014-02-04	615	Thasch
Harpia	14	5, -50	2014-02-04	615	Tingut
Harpia	14	5, -50	2014-02-04	615	Trovir
Harpia	14	5, -50	2014-02-04	615	Unk
Harpia	14	5, -50	2014-02-04	615	Xipgut
Harpia	14	5, -50	2014-02-04	630	Barmar
Harpia	14	5, -50	2014-02-04	630	Celgra
Harpia	14	5, -50	2014-02-04	630	Cercin
Harpia	14	5, -50	2014-02-04	630	Colplu
Harpia	14	5, -50	2014-02-04	630	Liotho
Harpia	14	5, -50	2014-02-04	630	Myrhau
Harpia	14	5, -50	2014-02-04	630	Phiert
Harpia	14	5, -50	2014-02-04	630	Thrcor
Harpia	14	5, -50	2014-02-04	630	Tingut
Harpia	14	5, -50	2014-02-04	630	Trovir
Harpia	14	5, -50	2014-02-04	630	Unk
Harpia	14	5, -50	2014-02-04	645	Barmar
Harpia	14	5, -50	2014-02-04	645	Cercin
Harpia	14	5, -50	2014-02-04	645	Geomon
Harpia	14	5, -50	2014-02-04	645	Gymleu
Harpia	14	5, -50	2014-02-04	645	Liotho
Harpia	14	5, -50	2014-02-04	645	Quepur
Harpia	14	5, -50	2014-02-04	645	Thasch
Harpia	14	5, -50	2014-02-04	645	Thrcor
Harpia	14	5, -50	2014-02-04	645	Tingut
Harpia	14	5, -50	2014-02-04	645	Trovir
Harpia	14	5, -50	2014-02-04	700	Barmar
Harpia	14	5, -50	2014-02-04	700	Capnig
Harpia	14	5, -50	2014-02-04	700	Cercin
Harpia	14	5, -50	2014-02-04	700	Geomon
Harpia	14	5, -50	2014-02-04	700	Gymleu
Harpia	14	5, -50	2014-02-04	700	Hylpoe
Harpia	14	5, -50	2014-02-04	700	Thasch
Harpia	14	5, -50	2014-02-04	700	Thrcor
Harpia	14	5, -50	2014-02-04	700	Tingut
Harpia	14	5, -50	2014-02-04	700	Trovir
Harpia	14	5, -50	2014-02-04	715	Barmar
Harpia	14	5, -50	2014-02-04	715	Cercin
Harpia	14	5, -50	2014-02-04	715	Colplu
Harpia	14	5, -50	2014-02-04	715	Geomon
Harpia	14	5, -50	2014-02-04	715	Glyspi
Harpia	14	5, -50	2014-02-04	715	Gymleu
Harpia	14	5, -50	2014-02-04	715	Hylpoe
Harpia	14	5, -50	2014-02-04	715	Myraxi
Harpia	14	5, -50	2014-02-04	715	Pipchl
Harpia	14	5, -50	2014-02-04	715	Ramtuc
Harpia	14	5, -50	2014-02-04	715	Thamur
Harpia	14	5, -50	2014-02-04	715	Thasch
Harpia	14	5, -50	2014-02-04	715	Tingut
Harpia	14	5, -50	2014-02-04	715	Trovir
Harpia	14	5, -50	2014-02-04	715	Xipgut
Harpia	14	5, -50	2014-02-04	730	Amafar
Harpia	14	5, -50	2014-02-04	730	Aramac
Harpia	14	5, -50	2014-02-04	730	Barmar
Harpia	14	5, -50	2014-02-04	730	Colplu
Harpia	14	5, -50	2014-02-04	730	Geomon
Harpia	14	5, -50	2014-02-04	730	Piomel
Harpia	14	5, -50	2014-02-04	730	Pygste
Harpia	14	5, -50	2014-02-04	730	Ramvit
Harpia	14	5, -50	2014-02-04	730	Thasch
Harpia	14	5, -50	2014-02-04	730	Trovir
Harpia	14	5, -50	2014-02-04	730	Unk
Harpia	14	5, -50	2014-02-04	730	Unk
Harpia	14	5, -50	2014-02-04	730	Unk
Harpia	14	5, -50	2014-02-04	745	Capnig
Harpia	14	5, -50	2014-02-04	745	Cercin
Harpia	14	5, -50	2014-02-04	745	Colplu
Harpia	14	5, -50	2014-02-04	745	Thasch
Harpia	14	5, -50	2014-02-04	745	Tingut
Harpia	14	5, -50	2014-02-04	745	Trovir
Harpia	14	5, -50	2014-02-04	745	Unk
Harpia	14	5, -50	2014-02-04	800	Barmar
Harpia	14	5, -50	2014-02-04	800	Brocya
Harpia	14	5, -50	2014-02-04	800	Colplu
Harpia	14	5, -50	2014-02-04	800	Dapame
Harpia	14	5, -50	2014-02-04	800	Geomon
Harpia	14	5, -50	2014-02-04	800	Hyloch
Harpia	14	5, -50	2014-02-04	800	Myrlon
Harpia	14	5, -50	2014-02-04	800	Myrmen
Harpia	14	5, -50	2014-02-04	800	Thacae
Harpia	14	5, -50	2014-02-04	800	Thasch
Harpia	14	5, -50	2014-02-04	800	Tingut
Harpia	14	5, -50	2014-02-04	800	Unk
Harpia	14	5, 800	2014-02-16	545	Abucum
Harpia	14	5, 800	2014-02-16	545	Barmar
Harpia	14	5, 800	2014-02-16	545	Cichuh
Harpia	14	5, 800	2014-02-16	545	Micgil
Harpia	14	5, 800	2014-02-16	600	Atispa
Harpia	14	5, 800	2014-02-16	600	Chipar
Harpia	14	5, 800	2014-02-16	600	Cryvar
Harpia	14	5, 800	2014-02-16	600	Dencer
Harpia	14	5, 800	2014-02-16	600	Denruf
Harpia	14	5, 800	2014-02-16	600	Freund
Harpia	14	5, 800	2014-02-16	600	Gymleu
Harpia	14	5, 800	2014-02-16	600	Hypcan
Harpia	14	5, 800	2014-02-16	600	Liotho
Harpia	14	5, 800	2014-02-16	600	Turalb
Harpia	14	5, 800	2014-02-16	600	Unk
Harpia	14	5, 800	2014-02-16	600	Xipgut
Harpia	14	5, 800	2014-02-16	615	Atispa
Harpia	14	5, 800	2014-02-16	615	Autinf
Harpia	14	5, 800	2014-02-16	615	Camtur
Harpia	14	5, 800	2014-02-16	615	Chipar
Harpia	14	5, 800	2014-02-16	615	Cryvar
Harpia	14	5, 800	2014-02-16	615	Freund
Harpia	14	5, 800	2014-02-16	615	Geomon
Harpia	14	5, 800	2014-02-16	615	Hylsub
Harpia	14	5, 800	2014-02-16	615	Liotho
Harpia	14	5, 800	2014-02-16	615	Myrmyo
Harpia	14	5, 800	2014-02-16	615	Xipgut
Harpia	14	5, 800	2014-02-16	630	Amafar
Harpia	14	5, 800	2014-02-16	630	Atispa
Harpia	14	5, 800	2014-02-16	630	Autinf
Harpia	14	5, 800	2014-02-16	630	Brocya
Harpia	14	5, 800	2014-02-16	630	Capnig
Harpia	14	5, 800	2014-02-16	630	Chipar
[truncated: 1,571 more rows]

## Sheet: H2015
Plot	Year	Point	Date	Time	Species
Harpia	15	1, -50	2015-02-07	545	Abucum
Harpia	15	1, 400	2015-02-13	545	Abucum
Harpia	15	1, 800	2015-02-17	545	Abucum
Harpia	15	3, -50	2015-02-07	545	Abucum
Harpia	15	3, 400	2015-02-13	545	Abucum
Harpia	15	3, 800	2015-02-17	545	Abucum
Harpia	15	4, 200	2015-02-12	545	Abucum
Harpia	15	5, 800	2015-02-17	545	Abucum
Harpia	15	7, 400	2015-02-13	545	Abucum
Harpia	15	7, 800	2015-02-17	545	Abucum
Harpia	15	8, 200	2015-02-12	545	Abucum
Harpia	15	9, 400	2015-02-13	545	Abucum
Harpia	15	10, 200	2015-02-12	545	Abucum
Harpia	15	10, 200	2015-02-12	600	Abucum
Harpia	15	5, -50	2015-02-07	645	Amaama
Harpia	15	5, -50	2015-02-07	715	Amaama
Harpia	15	1, -50	2015-02-07	615	Amafar
Harpia	15	1, -50	2015-02-07	645	Amafar
Harpia	15	1, -50	2015-02-07	715	Amafar
Harpia	15	1, -50	2015-02-07	730	Amafar
Harpia	15	1, -50	2015-02-07	800	Amafar
Harpia	15	1, 400	2015-02-13	700	Amafar
Harpia	15	1, 400	2015-02-13	730	Amafar
Harpia	15	1, 800	2015-02-17	645	Amafar
Harpia	15	1, 800	2015-02-17	715	Amafar
Harpia	15	1, 800	2015-02-17	730	Amafar
Harpia	15	1, 800	2015-02-17	745	Amafar
Harpia	15	1, 800	2015-02-17	800	Amafar
Harpia	15	2, 200	2015-02-17	615	Amafar
Harpia	15	2, 200	2015-02-17	645	Amafar
Harpia	15	2, 200	2015-02-17	715	Amafar
Harpia	15	2, 200	2015-02-17	730	Amafar
Harpia	15	2, 200	2015-02-17	745	Amafar
Harpia	15	2, 600	2015-02-16	730	Amafar
Harpia	15	3, -50	2015-02-07	615	Amafar
Harpia	15	3, -50	2015-02-07	645	Amafar
Harpia	15	3, -50	2015-02-07	700	Amafar
Harpia	15	3, -50	2015-02-07	715	Amafar
Harpia	15	3, -50	2015-02-07	730	Amafar
Harpia	15	3, -50	2015-02-07	745	Amafar
Harpia	15	3, -50	2015-02-07	800	Amafar
Harpia	15	3, 400	2015-02-13	615	Amafar
Harpia	15	3, 400	2015-02-13	630	Amafar
Harpia	15	3, 400	2015-02-13	730	Amafar
Harpia	15	3, 800	2015-02-17	730	Amafar
Harpia	15	3, 800	2015-02-17	745	Amafar
Harpia	15	3, 800	2015-02-17	800	Amafar
Harpia	15	5, -50	2015-02-07	615	Amafar
Harpia	15	5, -50	2015-02-07	630	Amafar
Harpia	15	5, -50	2015-02-07	700	Amafar
Harpia	15	5, -50	2015-02-07	715	Amafar
Harpia	15	5, -50	2015-02-07	730	Amafar
Harpia	15	5, -50	2015-02-07	745	Amafar
Harpia	15	5, -50	2015-02-07	800	Amafar
Harpia	15	5, 400	2015-02-13	615	Amafar
Harpia	15	5, 400	2015-02-13	700	Amafar
Harpia	15	5, 400	2015-02-13	730	Amafar
Harpia	15	5, 800	2015-02-17	615	Amafar
Harpia	15	5, 800	2015-02-17	745	Amafar
Harpia	15	5, 800	2015-02-17	800	Amafar
Harpia	15	6, 200	2015-02-12	630	Amafar
Harpia	15	6, 200	2015-02-12	645	Amafar
Harpia	15	6, 200	2015-02-12	715	Amafar
Harpia	15	6, 600	2015-02-16	700	Amafar
Harpia	15	6, 600	2015-02-16	715	Amafar
Harpia	15	6, 600	2015-02-16	730	Amafar
Harpia	15	6, 600	2015-02-16	745	Amafar
Harpia	15	7, -50	2015-02-07	615	Amafar
Harpia	15	7, -50	2015-02-07	630	Amafar
Harpia	15	7, -50	2015-02-07	645	Amafar
Harpia	15	7, -50	2015-02-07	645	Amafar
Harpia	15	7, -50	2015-02-07	700	Amafar
Harpia	15	7, -50	2015-02-07	715	Amafar
Harpia	15	7, -50	2015-02-07	730	Amafar
Harpia	15	7, 400	2015-02-13	615	Amafar
Harpia	15	7, 400	2015-02-13	700	Amafar
Harpia	15	7, 400	2015-02-13	730	Amafar
Harpia	15	7, 400	2015-02-13	745	Amafar
Harpia	15	7, 800	2015-02-17	615	Amafar
Harpia	15	7, 800	2015-02-17	630	Amafar
Harpia	15	7, 800	2015-02-17	745	Amafar
Harpia	15	7, 800	2015-02-17	800	Amafar
Harpia	15	8, 200	2015-02-10	730	Amafar
Harpia	15	8, 200	2015-02-10	745	Amafar
Harpia	15	8, 600	2015-02-16	730	Amafar
Harpia	15	9, -50	2015-02-07	600	Amafar
Harpia	15	9, -50	2015-02-07	615	Amafar
Harpia	15	9, -50	2015-02-07	630	Amafar
Harpia	15	9, -50	2015-02-07	645	Amafar
Harpia	15	9, -50	2015-02-07	700	Amafar
Harpia	15	9, -50	2015-02-07	715	Amafar
Harpia	15	9, 400	2015-02-13	615	Amafar
Harpia	15	9, 400	2015-02-13	700	Amafar
Harpia	15	9, 400	2015-02-13	730	Amafar
Harpia	15	9, 800	2015-02-17	615	Amafar
Harpia	15	9, 800	2015-02-17	630	Amafar
Harpia	15	9, 800	2015-02-17	745	Amafar
Harpia	15	9, 800	2015-02-17	800	Amafar
Harpia	15	1, 800	2015-02-17	630	Ancstr
Harpia	15	6, 600	2015-02-16	645	Ancstr
Harpia	15	7, -50	2015-02-07	600	Ancstr
Harpia	15	7, 400	2015-02-13	600	Ancstr
Harpia	15	9, 400	2015-02-13	730	Ancstr
Harpia	15	9, 400	2015-02-13	745	Ancstr
Harpia	15	9, 400	2015-02-13	800	Ancstr
Harpia	15	4, 600	2015-02-16	715	Araara
Harpia	15	4, 600	2015-02-16	730	Araara
Harpia	15	4, 600	2015-02-16	745	Araara
Harpia	15	7, -50	2015-02-07	630	Araara
Harpia	15	8, 600	2015-02-16	715	Araara
Harpia	15	10, 600	2015-02-16	800	Araleu
Harpia	15	2, 600	2015-02-16	715	Aramac
Harpia	15	2, 600	2015-02-16	730	Aramac
Harpia	15	2, 600	2015-02-16	745	Aramac
Harpia	15	3, -50	2015-02-07	730	Aramac
Harpia	15	3, 400	2015-02-13	700	Aramac
Harpia	15	4, 600	2015-02-16	730	Aramac
Harpia	15	5, 400	2015-02-13	700	Aramac
Harpia	15	9, -50	2015-02-07	630	Aramac
Harpia	15	10, 600	2015-02-16	715	Aramac
Harpia	15	1, -50	2015-02-07	730	Arasev
Harpia	15	1, 400	2015-02-13	615	Arasev
Harpia	15	7, -50	2015-02-07	715	Arawed
Harpia	15	1, -50	2015-02-07	545	Atispa
Harpia	15	1, -50	2015-02-07	630	Atispa
Harpia	15	1, -50	2015-02-07	645	Atispa
Harpia	15	1, -50	2015-02-07	700	Atispa
Harpia	15	1, -50	2015-02-07	715	Atispa
Harpia	15	1, -50	2015-02-07	730	Atispa
Harpia	15	1, -50	2015-02-07	745	Atispa
Harpia	15	1, 400	2015-02-13	600	Atispa
Harpia	15	1, 400	2015-02-13	615	Atispa
Harpia	15	1, 400	2015-02-13	630	Atispa
Harpia	15	1, 800	2015-02-17	630	Atispa
Harpia	15	2, 200	2015-02-17	615	Atispa
Harpia	15	2, 200	2015-02-17	630	Atispa
Harpia	15	2, 200	2015-02-17	645	Atispa
Harpia	15	3, -50	2015-02-07	600	Atispa
Harpia	15	3, -50	2015-02-07	615	Atispa
Harpia	15	3, -50	2015-02-07	630	Atispa
Harpia	15	3, -50	2015-02-07	645	Atispa
Harpia	15	3, -50	2015-02-07	700	Atispa
Harpia	15	3, 400	2015-02-13	630	Atispa
Harpia	15	3, 400	2015-02-13	645	Atispa
Harpia	15	3, 400	2015-02-13	700	Atispa
Harpia	15	3, 400	2015-02-13	715	Atispa
Harpia	15	3, 400	2015-02-13	730	Atispa
Harpia	15	3, 400	2015-02-13	745	Atispa
Harpia	15	3, 400	2015-02-13	800	Atispa
Harpia	15	3, 800	2015-02-17	715	Atispa
Harpia	15	4, 600	2015-02-16	645	Atispa
Harpia	15	5, 800	2015-02-17	600	Atispa
Harpia	15	5, 800	2015-02-17	615	Atispa
Harpia	15	5, 800	2015-02-17	630	Atispa
Harpia	15	5, 800	2015-02-17	645	Atispa
Harpia	15	5, 800	2015-02-17	700	Atispa
Harpia	15	6, 600	2015-02-16	600	Atispa
Harpia	15	6, 600	2015-02-16	630	Atispa
Harpia	15	6, 600	2015-02-16	645	Atispa
Harpia	15	6, 600	2015-02-16	700	Atispa
Harpia	15	7, 400	2015-02-13	700	Atispa
Harpia	15	7, 800	2015-02-17	600	Atispa
Harpia	15	7, 800	2015-02-17	615	Atispa
Harpia	15	7, 800	2015-02-17	630	Atispa
Harpia	15	7, 800	2015-02-17	645	Atispa
Harpia	15	7, 800	2015-02-17	700	Atispa
Harpia	15	7, 800	2015-02-17	715	Atispa
Harpia	15	8, 600	2015-02-16	645	Atispa
Harpia	15	9, 800	2015-02-17	600	Atispa
Harpia	15	9, 800	2015-02-17	615	Atispa
Harpia	15	9, 800	2015-02-17	630	Atispa
Harpia	15	9, 800	2015-02-17	645	Atispa
Harpia	15	9, 800	2015-02-17	700	Atispa
Harpia	15	10, 600	2015-02-16	615	Atispa
Harpia	15	10, 600	2015-02-16	645	Atispa
Harpia	15	1, -50	2015-02-07	615	Autinf
Harpia	15	1, -50	2015-02-07	630	Autinf
Harpia	15	1, 800	2015-02-17	645	Autinf
Harpia	15	2, 600	2015-02-16	600	Autinf
Harpia	15	2, 600	2015-02-16	615	Autinf
Harpia	15	2, 600	2015-02-16	630	Autinf
Harpia	15	2, 600	2015-02-16	645	Autinf
Harpia	15	3, 400	2015-02-13	700	Autinf
Harpia	15	4, 200	2015-02-12	800	Autinf
Harpia	15	4, 600	2015-02-16	645	Autinf
Harpia	15	4, 600	2015-02-16	700	Autinf
Harpia	15	4, 600	2015-02-16	800	Autinf
Harpia	15	5, 800	2015-02-17	615	Autinf
Harpia	15	5, 800	2015-02-17	730	Autinf
Harpia	15	6, 600	2015-02-16	800	Autinf
Harpia	15	9, -50	2015-02-07	730	Autinf
Harpia	15	9, -50	2015-02-07	745	Autinf
Harpia	15	10, 600	2015-02-16	700	Autmel
Harpia	15	1, -50	2015-02-07	545	Barmar
Harpia	15	1, 400	2015-02-13	545	Barmar
Harpia	15	1, 400	2015-02-13	600	Barmar
Harpia	15	1, 400	2015-02-13	615	Barmar
Harpia	15	1, 400	2015-02-13	630	Barmar
Harpia	15	1, 400	2015-02-13	645	Barmar
Harpia	15	1, 400	2015-02-13	700	Barmar
Harpia	15	1, 400	2015-02-13	715	Barmar
Harpia	15	1, 400	2015-02-13	730	Barmar
Harpia	15	1, 400	2015-02-13	745	Barmar
Harpia	15	1, 400	2015-02-13	800	Barmar
Harpia	15	1, 800	2015-02-17	715	Barmar
Harpia	15	1, 800	2015-02-17	730	Barmar
Harpia	15	1, 800	2015-02-17	745	Barmar
Harpia	15	1, 800	2015-02-17	800	Barmar
Harpia	15	2, 200	2015-02-17	615	Barmar
Harpia	15	2, 600	2015-02-16	615	Barmar
Harpia	15	7, 400	2015-02-13	600	Barmar
Harpia	15	7, 400	2015-02-13	615	Barmar
Harpia	15	7, 800	2015-02-17	545	Barmar
Harpia	15	7, 800	2015-02-17	615	Barmar
Harpia	15	8, 600	2015-02-16	600	Barmar
Harpia	15	9, -50	2015-02-07	545	Barmar
Harpia	15	9, -50	2015-02-07	600	Barmar
Harpia	15	9, 800	2015-02-17	545	Barmar
Harpia	15	9, 800	2015-02-17	600	Barmar
Harpia	15	1, -50	2015-02-07	630	Brocya
Harpia	15	1, -50	2015-02-07	645	Brocya
Harpia	15	1, -50	2015-02-07	700	Brocya
Harpia	15	1, -50	2015-02-07	730	Brocya
Harpia	15	1, -50	2015-02-07	745	Brocya
Harpia	15	1, -50	2015-02-07	800	Brocya
Harpia	15	1, 400	2015-02-13	730	Brocya
Harpia	15	1, 400	2015-02-13	745	Brocya
Harpia	15	1, 800	2015-02-17	645	Brocya
Harpia	15	1, 800	2015-02-17	700	Brocya
Harpia	15	1, 800	2015-02-17	745	Brocya
Harpia	15	2, 200	2015-02-17	730	Brocya
Harpia	15	2, 200	2015-02-17	745	Brocya
Harpia	15	2, 200	2015-02-17	800	Brocya
Harpia	15	2, 600	2015-02-16	745	Brocya
Harpia	15	2, 600	2015-02-16	800	Brocya
Harpia	15	3, -50	2015-02-07	645	Brocya
Harpia	15	3, -50	2015-02-07	700	Brocya
Harpia	15	3, -50	2015-02-07	715	Brocya
Harpia	15	3, -50	2015-02-07	730	Brocya
Harpia	15	3, -50	2015-02-07	800	Brocya
Harpia	15	3, 400	2015-02-13	700	Brocya
Harpia	15	3, 400	2015-02-13	715	Brocya
Harpia	15	3, 400	2015-02-13	730	Brocya
Harpia	15	3, 400	2015-02-13	800	Brocya
Harpia	15	3, 800	2015-02-17	630	Brocya
Harpia	15	3, 800	2015-02-17	645	Brocya
Harpia	15	3, 800	2015-02-17	700	Brocya
Harpia	15	3, 800	2015-02-17	730	Brocya
Harpia	15	4, 200	2015-02-12	645	Brocya
Harpia	15	4, 200	2015-02-12	700	Brocya
Harpia	15	4, 200	2015-02-12	730	Brocya
Harpia	15	4, 600	2015-02-16	800	Brocya
Harpia	15	5, -50	2015-02-07	645	Brocya
Harpia	15	5, -50	2015-02-07	700	Brocya
Harpia	15	5, -50	2015-02-07	730	Brocya
Harpia	15	5, 400	2015-02-13	630	Brocya
Harpia	15	5, 400	2015-02-13	700	Brocya
Harpia	15	5, 400	2015-02-13	715	Brocya
Harpia	15	5, 400	2015-02-13	730	Brocya
Harpia	15	5, 400	2015-02-13	800	Brocya
Harpia	15	5, 800	2015-02-17	615	Brocya
Harpia	15	5, 800	2015-02-17	700	Brocya
Harpia	15	5, 800	2015-02-17	730	Brocya
Harpia	15	5, 800	2015-02-17	800	Brocya
Harpia	15	6, 200	2015-02-12	645	Brocya
Harpia	15	6, 200	2015-02-12	800	Brocya
Harpia	15	6, 600	2015-02-16	600	Brocya
Harpia	15	7, -50	2015-02-07	645	Brocya
Harpia	15	7, -50	2015-02-07	700	Brocya
Harpia	15	7, -50	2015-02-07	730	Brocya
Harpia	15	7, -50	2015-02-07	800	Brocya
Harpia	15	7, 400	2015-02-13	730	Brocya
Harpia	15	7, 800	2015-02-17	800	Brocya
Harpia	15	8, 200	2015-02-10	700	Brocya
Harpia	15	8, 200	2015-02-10	715	Brocya
Harpia	15	8, 200	2015-02-10	730	Brocya
Harpia	15	9, -50	2015-02-07	645	Brocya
Harpia	15	9, -50	2015-02-07	700	Brocya
Harpia	15	9, -50	2015-02-07	715	Brocya
Harpia	15	9, -50	2015-02-07	730	Brocya
Harpia	15	9, -50	2015-02-07	745	Brocya
Harpia	15	9, 400	2015-02-13	730	Brocya
Harpia	15	9, 800	2015-02-17	800	Brocya
Harpia	15	7, 400	2015-02-13	600	Buccap
Harpia	15	7, 400	2015-02-13	645	Buccap
Harpia	15	8, 200	2015-02-12	545	Buccap
Harpia	15	8, 200	2015-02-12	600	Buccap
Harpia	15	8, 200	2015-02-12	630	Buccap
Harpia	15	8, 600	2015-02-16	600	Buccap
Harpia	15	9, -50	2015-02-07	600	Buccap
Harpia	15	9, 400	2015-02-13	600	Buccap
Harpia	15	9, 400	2015-02-13	615	Buccap
Harpia	15	9, 400	2015-02-13	645	Buccap
Harpia	15	10, 200	2015-02-12	600	Buccap
Harpia	15	10, 200	2015-02-12	630	Buccap
Harpia	15	10, 200	2015-02-12	715	Caccel
Harpia	15	1, 400	2015-02-13	630	Cammel
Harpia	15	1, 800	2015-02-17	645	Cammel
Harpia	15	1, 800	2015-02-17	745	Cammel
Harpia	15	2, 200	2015-02-17	645	Cammel
Harpia	15	3, 800	2015-02-17	745	Cammel
Harpia	15	3, 800	2015-02-17	800	Cammel
Harpia	15	4, 200	2015-02-12	645	Cammel
Harpia	15	5, 800	2015-02-17	700	Cammel
Harpia	15	5, 800	2015-02-17	715	Cammel
Harpia	15	5, 800	2015-02-17	745	Cammel
Harpia	15	7, -50	2015-02-07	615	Cammel
Harpia	15	7, 800	2015-02-17	730	Cammel
Harpia	15	1, -50	2015-02-07	630	Camrub
Harpia	15	1, -50	2015-02-07	730	Camrub
Harpia	15	1, 800	2015-02-17	730	Camrub
Harpia	15	1, 800	2015-02-17	745	Camrub
Harpia	15	1, 800	2015-02-17	800	Camrub
Harpia	15	3, -50	2015-02-07	730	Camrub
Harpia	15	5, -50	2015-02-07	715	Camrub
Harpia	15	5, -50	2015-02-07	730	Camrub
Harpia	15	5, -50	2015-02-07	745	Camrub
Harpia	15	5, -50	2015-02-07	800	Camrub
Harpia	15	5, 400	2015-02-13	630	Camrub
Harpia	15	5, 400	2015-02-13	645	Camrub
Harpia	15	7, -50	2015-02-07	715	Camrub
Harpia	15	7, -50	2015-02-07	730	Camrub
Harpia	15	7, -50	2015-02-07	745	Camrub
Harpia	15	7, -50	2015-02-07	800	Camrub
Harpia	15	7, 400	2015-02-13	715	Camrub
Harpia	15	8, 200	2015-02-10	745	Camrub
Harpia	15	8, 200	2015-02-10	800	Camrub
Harpia	15	8, 600	2015-02-16	645	Camrub
Harpia	15	8, 600	2015-02-16	730	Camrub
Harpia	15	8, 600	2015-02-16	745	Camrub
Harpia	15	8, 600	2015-02-16	800	Camrub
Harpia	15	9, -50	2015-02-07	715	Camrub
Harpia	15	9, -50	2015-02-07	730	Camrub
Harpia	15	9, -50	2015-02-07	745	Camrub
Harpia	15	9, 400	2015-02-13	715	Camrub
Harpia	15	9, 800	2015-02-17	730	Camrub
Harpia	15	10, 600	2015-02-16	715	Camrub
Harpia	15	10, 600	2015-02-16	730	Camrub
Harpia	15	10, 600	2015-02-16	745	Camrub
Harpia	15	10, 600	2015-02-16	800	Camrub
Harpia	15	5, 400	2015-02-13	545	Camtro
Harpia	15	5, 400	2015-02-13	600	Camtro
Harpia	15	5, 400	2015-02-13	615	Camtro
Harpia	15	4, 600	2015-02-16	600	Camtur
Harpia	15	5, 400	2015-02-13	730	Camtur
Harpia	15	6, 600	2015-02-16	600	Camtur
Harpia	15	7, 400	2015-02-13	600	Camtur
Harpia	15	1, -50	2015-02-07	630	Capnig
Harpia	15	1, -50	2015-02-07	700	Capnig
Harpia	15	1, -50	2015-02-07	730	Capnig
Harpia	15	1, -50	2015-02-07	745	Capnig
Harpia	15	1, 400	2015-02-13	615	Capnig
Harpia	15	1, 400	2015-02-13	715	Capnig
Harpia	15	1, 400	2015-02-13	745	Capnig
Harpia	15	1, 400	2015-02-13	800	Capnig
Harpia	15	1, 800	2015-02-17	730	Capnig
Harpia	15	1, 800	2015-02-17	745	Capnig
Harpia	15	2, 200	2015-02-17	715	Capnig
Harpia	15	2, 200	2015-02-17	730	Capnig
Harpia	15	2, 600	2015-02-16	615	Capnig
Harpia	15	2, 600	2015-02-16	630	Capnig
Harpia	15	2, 600	2015-02-16	645	Capnig
Harpia	15	2, 600	2015-02-16	730	Capnig
Harpia	15	3, -50	2015-02-07	600	Capnig
Harpia	15	3, -50	2015-02-07	630	Capnig
Harpia	15	3, -50	2015-02-07	645	Capnig
Harpia	15	3, -50	2015-02-07	700	Capnig
Harpia	15	3, -50	2015-02-07	715	Capnig
Harpia	15	3, -50	2015-02-07	730	Capnig
Harpia	15	3, -50	2015-02-07	745	Capnig
Harpia	15	3, -50	2015-02-07	800	Capnig
Harpia	15	3, 400	2015-02-13	615	Capnig
Harpia	15	3, 400	2015-02-13	645	Capnig
Harpia	15	3, 400	2015-02-13	700	Capnig
Harpia	15	3, 400	2015-02-13	715	Capnig
Harpia	15	3, 400	2015-02-13	730	Capnig
Harpia	15	3, 400	2015-02-13	745	Capnig
Harpia	15	3, 400	2015-02-13	800	Capnig
Harpia	15	3, 800	2015-02-17	615	Capnig
Harpia	15	4, 200	2015-02-12	615	Capnig
Harpia	15	4, 200	2015-02-12	630	Capnig
Harpia	15	4, 200	2015-02-12	645	Capnig
Harpia	15	4, 200	2015-02-12	700	Capnig
Harpia	15	4, 200	2015-02-12	715	Capnig
Harpia	15	4, 200	2015-02-12	730	Capnig
Harpia	15	4, 200	2015-02-12	745	Capnig
Harpia	15	4, 200	2015-02-12	800	Capnig
Harpia	15	4, 600	2015-02-16	630	Capnig
Harpia	15	4, 600	2015-02-16	800	Capnig
Harpia	15	5, -50	2015-02-07	600	Capnig
Harpia	15	5, -50	2015-02-07	615	Capnig
Harpia	15	5, -50	2015-02-07	630	Capnig
Harpia	15	5, -50	2015-02-07	645	Capnig
Harpia	15	5, -50	2015-02-07	700	Capnig
Harpia	15	5, -50	2015-02-07	715	Capnig
Harpia	15	5, -50	2015-02-07	730	Capnig
Harpia	15	5, -50	2015-02-07	745	Capnig
Harpia	15	5, -50	2015-02-07	800	Capnig
Harpia	15	5, 400	2015-02-13	600	Capnig
Harpia	15	5, 400	2015-02-13	645	Capnig
Harpia	15	5, 400	2015-02-13	700	Capnig
Harpia	15	5, 400	2015-02-13	715	Capnig
Harpia	15	5, 400	2015-02-13	730	Capnig
Harpia	15	5, 400	2015-02-13	745	Capnig
Harpia	15	5, 400	2015-02-13	800	Capnig
Harpia	15	5, 800	2015-02-17	645	Capnig
Harpia	15	5, 800	2015-02-17	700	Capnig
Harpia	15	5, 800	2015-02-17	715	Capnig
Harpia	15	5, 800	2015-02-17	730	Capnig
Harpia	15	5, 800	2015-02-17	745	Capnig
Harpia	15	5, 800	2015-02-17	800	Capnig
Harpia	15	6, 200	2015-02-12	615	Capnig
Harpia	15	6, 200	2015-02-12	630	Capnig
Harpia	15	6, 200	2015-02-12	645	Capnig
Harpia	15	6, 200	2015-02-12	700	Capnig
Harpia	15	6, 200	2015-02-12	715	Capnig
Harpia	15	6, 200	2015-02-12	730	Capnig
Harpia	15	6, 200	2015-02-12	745	Capnig
Harpia	15	6, 200	2015-02-12	800	Capnig
Harpia	15	6, 600	2015-02-16	600	Capnig
Harpia	15	6, 600	2015-02-16	715	Capnig
Harpia	15	6, 600	2015-02-16	745	Capnig
Harpia	15	6, 600	2015-02-16	800	Capnig
Harpia	15	7, -50	2015-02-07	615	Capnig
Harpia	15	7, -50	2015-02-07	630	Capnig
Harpia	15	7, -50	2015-02-07	645	Capnig
Harpia	15	7, -50	2015-02-07	700	Capnig
Harpia	15	7, -50	2015-02-07	730	Capnig
Harpia	15	7, -50	2015-02-07	745	Capnig
Harpia	15	7, -50	2015-02-07	800	Capnig
Harpia	15	7, 400	2015-02-13	600	Capnig
Harpia	15	7, 400	2015-02-13	615	Capnig
Harpia	15	7, 400	2015-02-13	645	Capnig
Harpia	15	7, 400	2015-02-13	715	Capnig
Harpia	15	7, 400	2015-02-13	730	Capnig
Harpia	15	7, 400	2015-02-13	745	Capnig
Harpia	15	7, 400	2015-02-13	800	Capnig
Harpia	15	7, 800	2015-02-17	700	Capnig
Harpia	15	7, 800	2015-02-17	715	Capnig
Harpia	15	7, 800	2015-02-17	730	Capnig
Harpia	15	7, 800	2015-02-17	745	Capnig
Harpia	15	8, 200	2015-02-12	630	Capnig
Harpia	15	8, 200	2015-02-12	645	Capnig
Harpia	15	8, 200	2015-02-10	700	Capnig
Harpia	15	8, 200	2015-02-10	715	Capnig
Harpia	15	8, 200	2015-02-10	730	Capnig
Harpia	15	8, 200	2015-02-10	745	Capnig
Harpia	15	8, 200	2015-02-10	800	Capnig
Harpia	15	8, 600	2015-02-16	600	Capnig
Harpia	15	8, 600	2015-02-16	615	Capnig
Harpia	15	8, 600	2015-02-16	630	Capnig
Harpia	15	8, 600	2015-02-16	645	Capnig
Harpia	15	8, 600	2015-02-16	715	Capnig
Harpia	15	8, 600	2015-02-16	730	Capnig
Harpia	15	8, 600	2015-02-16	745	Capnig
Harpia	15	8, 600	2015-02-16	800	Capnig
Harpia	15	9, -50	2015-02-07	600	Capnig
Harpia	15	9, -50	2015-02-07	615	Capnig
Harpia	15	9, -50	2015-02-07	645	Capnig
Harpia	15	9, -50	2015-02-07	700	Capnig
Harpia	15	9, -50	2015-02-07	730	Capnig
Harpia	15	9, -50	2015-02-07	730	Capnig
Harpia	15	9, -50	2015-02-07	745	Capnig
Harpia	15	9, -50	2015-02-07	800	Capnig
Harpia	15	9, 400	2015-02-13	615	Capnig
Harpia	15	9, 400	2015-02-13	645	Capnig
Harpia	15	9, 400	2015-02-13	715	Capnig
Harpia	15	9, 400	2015-02-13	745	Capnig
Harpia	15	9, 400	2015-02-13	800	Capnig
Harpia	15	9, 800	2015-02-17	600	Capnig
Harpia	15	9, 800	2015-02-17	700	Capnig
Harpia	15	9, 800	2015-02-17	730	Capnig
Harpia	15	9, 800	2015-02-17	745	Capnig
Harpia	15	10, 200	2015-02-12	630	Capnig
Harpia	15	10, 200	2015-02-12	645	Capnig
Harpia	15	10, 200	2015-02-12	700	Capnig
Harpia	15	10, 200	2015-02-12	715	Capnig
Harpia	15	10, 200	2015-02-12	730	Capnig
Harpia	15	10, 200	2015-02-12	745	Capnig
Harpia	15	10, 200	2015-02-12	800	Capnig
Harpia	15	10, 600	2015-02-16	600	Capnig
Harpia	15	10, 600	2015-02-16	615	Capnig
Harpia	15	10, 600	2015-02-16	630	Capnig
Harpia	15	10, 600	2015-02-16	645	Capnig
Harpia	15	10, 600	2015-02-16	715	Capnig
Harpia	15	10, 600	2015-02-16	730	Capnig
Harpia	15	10, 600	2015-02-16	745	Capnig
Harpia	15	10, 600	2015-02-16	800	Capnig
Harpia	15	2, 200	2015-02-17	715	Celele
Harpia	15	4, 600	2015-02-16	745	Celele
Harpia	15	5, -50	2015-02-07	630	Celele
Harpia	15	7, -50	2015-02-07	630	Celele
Harpia	15	7, -50	2015-02-07	645	Celele
Harpia	15	7, 400	2015-02-13	615	Celele
Harpia	15	8, 200	2015-02-12	615	Celele
Harpia	15	8, 200	2015-02-10	730	Celele
Harpia	15	8, 200	2015-02-10	745	Celele
Harpia	15	8, 600	2015-02-16	615	Celele
Harpia	15	8, 600	2015-02-16	630	Celele
Harpia	15	9, -50	2015-02-07	730	Celele
Harpia	15	9, 400	2015-02-13	630	Celele
Harpia	15	9, 800	2015-02-17	615	Celele
Harpia	15	10, 200	2015-02-12	715	Celele
Harpia	15	1, -50	2015-02-07	645	Celgra
Harpia	15	1, 400	2015-02-13	645	Celgra
Harpia	15	1, 400	2015-02-13	715	Celgra
Harpia	15	1, 400	2015-02-13	730	Celgra
Harpia	15	1, 400	2015-02-13	745	Celgra
Harpia	15	3, -50	2015-02-07	615	Celgra
Harpia	15	3, -50	2015-02-07	700	Celgra
Harpia	15	3, 400	2015-02-13	615	Celgra
Harpia	15	3, 400	2015-02-13	800	Celgra
Harpia	15	4, 200	2015-02-12	630	Celgra
Harpia	15	4, 200	2015-02-12	645	Celgra
Harpia	15	4, 200	2015-02-12	700	Celgra
Harpia	15	1, 400	2015-02-13	715	Celtor
Harpia	15	1, 800	2015-02-17	630	Celtor
Harpia	15	3, 800	2015-02-17	615	Celtor
Harpia	15	3, 800	2015-02-17	630	Celtor
Harpia	15	5, 400	2015-02-13	615	Celtor
Harpia	15	5, 800	2015-02-17	615	Celtor
Harpia	15	5, 800	2015-02-17	630	Celtor
Harpia	15	7, -50	2015-02-07	615	Celtor
Harpia	15	7, -50	2015-02-07	645	Celtor
Harpia	15	9, -50	2015-02-07	615	Celtor
Harpia	15	9, -50	2015-02-07	630	Celtor
Harpia	15	9, -50	2015-02-07	645	Celtor
Harpia	15	1, -50	2015-02-07	615	Cercin
Harpia	15	1, -50	2015-02-07	630	Cercin
Harpia	15	1, -50	2015-02-07	645	Cercin
Harpia	15	1, -50	2015-02-07	700	Cercin
Harpia	15	1, -50	2015-02-07	730	Cercin
Harpia	15	1, -50	2015-02-07	745	Cercin
Harpia	15	1, -50	2015-02-07	800	Cercin
Harpia	15	1, 400	2015-02-13	600	Cercin
Harpia	15	1, 400	2015-02-13	615	Cercin
Harpia	15	1, 800	2015-02-17	600	Cercin
Harpia	15	1, 800	2015-02-17	615	Cercin
Harpia	15	1, 800	2015-02-17	630	Cercin
Harpia	15	1, 800	2015-02-17	645	Cercin
Harpia	15	1, 800	2015-02-17	700	Cercin
Harpia	15	1, 800	2015-02-17	715	Cercin
Harpia	15	1, 800	2015-02-17	730	Cercin
Harpia	15	1, 800	2015-02-17	800	Cercin
Harpia	15	2, 200	2015-02-17	700	Cercin
Harpia	15	2, 200	2015-02-17	800	Cercin
Harpia	15	2, 600	2015-02-16	630	Cercin
Harpia	15	2, 600	2015-02-16	645	Cercin
Harpia	15	2, 600	2015-02-16	700	Cercin
Harpia	15	3, -50	2015-02-07	600	Cercin
Harpia	15	3, -50	2015-02-07	615	Cercin
Harpia	15	3, -50	2015-02-07	630	Cercin
Harpia	15	3, -50	2015-02-07	645	Cercin
Harpia	15	3, -50	2015-02-07	700	Cercin
Harpia	15	3, -50	2015-02-07	745	Cercin
Harpia	15	3, -50	2015-02-07	800	Cercin
Harpia	15	3, 400	2015-02-13	615	Cercin
Harpia	15	3, 400	2015-02-13	630	Cercin
Harpia	15	3, 400	2015-02-13	645	Cercin
Harpia	15	3, 400	2015-02-13	700	Cercin
Harpia	15	3, 400	2015-02-13	715	Cercin
Harpia	15	3, 400	2015-02-13	745	Cercin
Harpia	15	4, 600	2015-02-16	700	Cercin
Harpia	15	4, 600	2015-02-16	715	Cercin
Harpia	15	4, 600	2015-02-16	730	Cercin
Harpia	15	4, 600	2015-02-16	745	Cercin
Harpia	15	4, 600	2015-02-16	800	Cercin
Harpia	15	5, -50	2015-02-07	600	Cercin
Harpia	15	5, -50	2015-02-07	630	Cercin
Harpia	15	5, -50	2015-02-07	645	Cercin
Harpia	15	5, -50	2015-02-07	700	Cercin
Harpia	15	5, -50	2015-02-07	715	Cercin
Harpia	15	5, 400	2015-02-13	630	Cercin
Harpia	15	5, 400	2015-02-13	700	Cercin
Harpia	15	5, 400	2015-02-13	715	Cercin
Harpia	15	5, 400	2015-02-13	730	Cercin
Harpia	15	5, 400	2015-02-13	745	Cercin
Harpia	15	5, 400	2015-02-13	800	Cercin
Harpia	15	5, 800	2015-02-17	600	Cercin
Harpia	15	5, 800	2015-02-17	615	Cercin
Harpia	15	5, 800	2015-02-17	630	Cercin
Harpia	15	5, 800	2015-02-17	645	Cercin
Harpia	15	5, 800	2015-02-17	700	Cercin
Harpia	15	5, 800	2015-02-17	715	Cercin
Harpia	15	5, 800	2015-02-17	730	Cercin
Harpia	15	6, 200	2015-02-12	615	Cercin
Harpia	15	6, 200	2015-02-12	630	Cercin
Harpia	15	6, 200	2015-02-12	645	Cercin
Harpia	15	6, 200	2015-02-12	700	Cercin
Harpia	15	6, 200	2015-02-12	715	Cercin
Harpia	15	6, 200	2015-02-12	730	Cercin
Harpia	15	6, 200	2015-02-12	745	Cercin
Harpia	15	6, 200	2015-02-12	800	Cercin
Harpia	15	6, 600	2015-02-16	630	Cercin
Harpia	15	6, 600	2015-02-16	645	Cercin
Harpia	15	6, 600	2015-02-16	700	Cercin
Harpia	15	6, 600	2015-02-16	715	Cercin
Harpia	15	6, 600	2015-02-16	745	Cercin
Harpia	15	6, 600	2015-02-16	800	Cercin
Harpia	15	7, -50	2015-02-07	615	Cercin
Harpia	15	7, -50	2015-02-07	645	Cercin
Harpia	15	7, -50	2015-02-07	700	Cercin
Harpia	15	7, -50	2015-02-07	715	Cercin
Harpia	15	7, -50	2015-02-07	730	Cercin
Harpia	15	7, -50	2015-02-07	745	Cercin
Harpia	15	7, -50	2015-02-07	800	Cercin
Harpia	15	7, 400	2015-02-13	600	Cercin
Harpia	15	7, 400	2015-02-13	615	Cercin
Harpia	15	7, 400	2015-02-13	630	Cercin
Harpia	15	7, 400	2015-02-13	645	Cercin
Harpia	15	7, 400	2015-02-13	700	Cercin
Harpia	15	7, 400	2015-02-13	715	Cercin
Harpia	15	7, 400	2015-02-13	730	Cercin
Harpia	15	7, 400	2015-02-13	745	Cercin
Harpia	15	7, 400	2015-02-13	800	Cercin
Harpia	15	7, 800	2015-02-17	600	Cercin
Harpia	15	7, 800	2015-02-17	645	Cercin
Harpia	15	7, 800	2015-02-17	700	Cercin
Harpia	15	7, 800	2015-02-17	715	Cercin
Harpia	15	7, 800	2015-02-17	800	Cercin
Harpia	15	8, 200	2015-02-12	600	Cercin
Harpia	15	8, 200	2015-02-12	615	Cercin
Harpia	15	8, 200	2015-02-12	630	Cercin
Harpia	15	8, 200	2015-02-12	645	Cercin
Harpia	15	8, 200	2015-02-10	700	Cercin
Harpia	15	8, 200	2015-02-10	715	Cercin
Harpia	15	9, -50	2015-02-07	600	Cercin
Harpia	15	9, -50	2015-02-07	615	Cercin
Harpia	15	9, -50	2015-02-07	630	Cercin
Harpia	15	9, -50	2015-02-07	645	Cercin
Harpia	15	9, -50	2015-02-07	700	Cercin
Harpia	15	9, -50	2015-02-07	715	Cercin
Harpia	15	9, -50	2015-02-07	730	Cercin
Harpia	15	9, -50	2015-02-07	745	Cercin
Harpia	15	9, 400	2015-02-13	615	Cercin
Harpia	15	9, 400	2015-02-13	630	Cercin
Harpia	15	9, 400	2015-02-13	645	Cercin
Harpia	15	9, 400	2015-02-13	645	Cercin
Harpia	15	9, 400	2015-02-13	700	Cercin
Harpia	15	9, 400	2015-02-13	715	Cercin
Harpia	15	9, 400	2015-02-13	730	Cercin
Harpia	15	9, 400	2015-02-13	745	Cercin
Harpia	15	9, 400	2015-02-13	800	Cercin
Harpia	15	9, 800	2015-02-17	600	Cercin
Harpia	15	9, 800	2015-02-17	615	Cercin
Harpia	15	9, 800	2015-02-17	630	Cercin
Harpia	15	9, 800	2015-02-17	645	Cercin
Harpia	15	9, 800	2015-02-17	700	Cercin
Harpia	15	9, 800	2015-02-17	715	Cercin
Harpia	15	9, 800	2015-02-17	730	Cercin
Harpia	15	9, 800	2015-02-17	800	Cercin
Harpia	15	10, 200	2015-02-12	630	Cercin
Harpia	15	10, 200	2015-02-12	715	Cercin
Harpia	15	10, 200	2015-02-12	730	Cercin
Harpia	15	10, 200	2015-02-12	745	Cercin
Harpia	15	10, 600	2015-02-16	645	Cercin
Harpia	15	10, 600	2015-02-16	715	Cercin
Harpia	15	1, 400	2015-02-13	630	Cerser
Harpia	15	3, 800	2015-02-17	615	Cerser
Harpia	15	3, 800	2015-02-17	630	Cerser
Harpia	15	3, 800	2015-02-17	700	Cerser
Harpia	15	3, 800	2015-02-17	715	Cerser
Harpia	15	3, 800	2015-02-17	730	Cerser
Harpia	15	3, 800	2015-02-17	745	Cerser
Harpia	15	1, -50	2015-02-07	600	Chipar
Harpia	15	1, -50	2015-02-07	745	Chipar
Harpia	15	1, -50	2015-02-07	800	Chipar
Harpia	15	1, 800	2015-02-17	600	Chipar
Harpia	15	2, 600	2015-02-16	630	Chipar
Harpia	15	2, 600	2015-02-16	645	Chipar
Harpia	15	2, 600	2015-02-16	700	Chipar
Harpia	15	2, 600	2015-02-16	715	Chipar
Harpia	15	2, 600	2015-02-16	730	Chipar
Harpia	15	2, 600	2015-02-16	745	Chipar
Harpia	15	2, 600	2015-02-16	800	Chipar
Harpia	15	3, -50	2015-02-07	615	Chipar
Harpia	15	3, -50	2015-02-07	630	Chipar
Harpia	15	3, -50	2015-02-07	645	Chipar
Harpia	15	3, -50	2015-02-07	700	Chipar
Harpia	15	3, -50	2015-02-07	715	Chipar
Harpia	15	3, -50	2015-02-07	730	Chipar
Harpia	15	3, -50	2015-02-07	800	Chipar
Harpia	15	3, 400	2015-02-13	630	Chipar
Harpia	15	3, 400	2015-02-13	645	Chipar
Harpia	15	3, 400	2015-02-13	700	Chipar
Harpia	15	3, 400	2015-02-13	730	Chipar
Harpia	15	3, 400	2015-02-13	745	Chipar
Harpia	15	3, 400	2015-02-13	800	Chipar
Harpia	15	3, 800	2015-02-17	600	Chipar
Harpia	15	3, 800	2015-02-17	615	Chipar
Harpia	15	3, 800	2015-02-17	630	Chipar
Harpia	15	3, 800	2015-02-17	645	Chipar
Harpia	15	3, 800	2015-02-17	700	Chipar
Harpia	15	3, 800	2015-02-17	715	Chipar
Harpia	15	3, 800	2015-02-17	730	Chipar
Harpia	15	3, 800	2015-02-17	745	Chipar
Harpia	15	3, 800	2015-02-17	800	Chipar
Harpia	15	4, 600	2015-02-16	700	Chipar
Harpia	15	4, 600	2015-02-16	715	Chipar
Harpia	15	4, 600	2015-02-16	730	Chipar
Harpia	15	5, 800	2015-02-17	600	Chipar
Harpia	15	5, 800	2015-02-17	615	Chipar
Harpia	15	5, 800	2015-02-17	630	Chipar
Harpia	15	5, 800	2015-02-17	645	Chipar
Harpia	15	5, 800	2015-02-17	700	Chipar
Harpia	15	5, 800	2015-02-17	715	Chipar
Harpia	15	5, 800	2015-02-17	730	Chipar
Harpia	15	5, 800	2015-02-17	745	Chipar
Harpia	15	5, 800	2015-02-17	800	Chipar
Harpia	15	7, 800	2015-02-17	615	Chipar
Harpia	15	8, 200	2015-02-12	600	Chipar
Harpia	15	8, 200	2015-02-12	615	Chipar
Harpia	15	2, 200	2015-02-17	545	Cichuh
Harpia	15	2, 600	2015-02-16	545	Cichuh
Harpia	15	3, -50	2015-02-07	545	Cichuh
Harpia	15	3, 400	2015-02-13	545	Cichuh
Harpia	15	5, 400	2015-02-13	545	Cichuh
Harpia	15	7, -50	2015-02-07	545	Cichuh
Harpia	15	8, 200	2015-02-12	545	Cichuh
Harpia	15	9, -50	2015-02-07	545	Cichuh
Harpia	15	9, 800	2015-02-17	545	Cichuh
Harpia	15	10, 200	2015-02-12	545	Cichuh
Harpia	15	10, 200	2015-02-12	600	Cichuh
Harpia	15	3, 400	2015-02-13	745	Cnisub
Harpia	15	1, -50	2015-02-07	630	Colplu
Harpia	15	1, -50	2015-02-07	700	Colplu
Harpia	15	1, -50	2015-02-07	715	Colplu
Harpia	15	1, -50	2015-02-07	730	Colplu
Harpia	15	1, -50	2015-02-07	745	Colplu
Harpia	15	1, -50	2015-02-07	800	Colplu
Harpia	15	1, 800	2015-02-17	700	Colplu
Harpia	15	1, 800	2015-02-17	715	Colplu
Harpia	15	1, 800	2015-02-17	730	Colplu
Harpia	15	1, 800	2015-02-17	745	Colplu
Harpia	15	2, 200	2015-02-17	715	Colplu
Harpia	15	2, 200	2015-02-17	730	Colplu
Harpia	15	2, 200	2015-02-17	745	Colplu
Harpia	15	2, 600	2015-02-16	645	Colplu
Harpia	15	2, 600	2015-02-16	700	Colplu
Harpia	15	2, 600	2015-02-16	730	Colplu
Harpia	15	2, 600	2015-02-16	800	Colplu
Harpia	15	3, -50	2015-02-07	645	Colplu
Harpia	15	3, -50	2015-02-07	700	Colplu
Harpia	15	3, -50	2015-02-07	745	Colplu
Harpia	15	3, -50	2015-02-07	800	Colplu
Harpia	15	3, 400	2015-02-13	600	Colplu
Harpia	15	3, 400	2015-02-13	630	Colplu
Harpia	15	3, 400	2015-02-13	645	Colplu
Harpia	15	3, 400	2015-02-13	715	Colplu
Harpia	15	3, 400	2015-02-13	745	Colplu
Harpia	15	3, 400	2015-02-13	800	Colplu
Harpia	15	3, 800	2015-02-17	700	Colplu
Harpia	15	3, 800	2015-02-17	715	Colplu
Harpia	15	3, 800	2015-02-17	730	Colplu
Harpia	15	3, 800	2015-02-17	745	Colplu
Harpia	15	3, 800	2015-02-17	800	Colplu
Harpia	15	4, 200	2015-02-12	630	Colplu
Harpia	15	4, 200	2015-02-12	800	Colplu
Harpia	15	4, 600	2015-02-16	630	Colplu
Harpia	15	4, 600	2015-02-16	700	Colplu
Harpia	15	4, 600	2015-02-16	800	Colplu
Harpia	15	5, -50	2015-02-07	615	Colplu
Harpia	15	5, -50	2015-02-07	630	Colplu
Harpia	15	5, -50	2015-02-07	645	Colplu
Harpia	15	5, -50	2015-02-07	700	Colplu
Harpia	15	5, -50	2015-02-07	715	Colplu
Harpia	15	5, -50	2015-02-07	730	Colplu
Harpia	15	5, -50	2015-02-07	745	Colplu
Harpia	15	5, -50	2015-02-07	800	Colplu
Harpia	15	5, 400	2015-02-13	600	Colplu
Harpia	15	5, 400	2015-02-13	630	Colplu
Harpia	15	5, 400	2015-02-13	645	Colplu
Harpia	15	5, 400	2015-02-13	715	Colplu
Harpia	15	5, 400	2015-02-13	730	Colplu
Harpia	15	5, 400	2015-02-13	745	Colplu
Harpia	15	5, 400	2015-02-13	800	Colplu
Harpia	15	5, 800	2015-02-17	615	Colplu
Harpia	15	5, 800	2015-02-17	630	Colplu
Harpia	15	5, 800	2015-02-17	645	Colplu
Harpia	15	5, 800	2015-02-17	700	Colplu
Harpia	15	5, 800	2015-02-17	715	Colplu
Harpia	15	5, 800	2015-02-17	730	Colplu
Harpia	15	5, 800	2015-02-17	745	Colplu
Harpia	15	5, 800	2015-02-17	800	Colplu
Harpia	15	6, 200	2015-02-12	630	Colplu
Harpia	15	6, 200	2015-02-12	715	Colplu
Harpia	15	6, 200	2015-02-12	730	Colplu
Harpia	15	6, 200	2015-02-12	745	Colplu
Harpia	15	6, 200	2015-02-12	800	Colplu
Harpia	15	6, 600	2015-02-16	615	Colplu
Harpia	15	6, 600	2015-02-16	630	Colplu
Harpia	15	6, 600	2015-02-16	645	Colplu
Harpia	15	6, 600	2015-02-16	745	Colplu
Harpia	15	6, 600	2015-02-16	800	Colplu
Harpia	15	7, -50	2015-02-07	615	Colplu
Harpia	15	7, -50	2015-02-07	630	Colplu
Harpia	15	7, -50	2015-02-07	645	Colplu
Harpia	15	7, -50	2015-02-07	700	Colplu
Harpia	15	7, -50	2015-02-07	730	Colplu
Harpia	15	7, -50	2015-02-07	745	Colplu
Harpia	15	7, -50	2015-02-07	800	Colplu
Harpia	15	7, 400	2015-02-13	600	Colplu
Harpia	15	7, 400	2015-02-13	630	Colplu
Harpia	15	7, 400	2015-02-13	645	Colplu
Harpia	15	7, 400	2015-02-13	745	Colplu
Harpia	15	7, 400	2015-02-13	800	Colplu
Harpia	15	7, 800	2015-02-17	615	Colplu
Harpia	15	7, 800	2015-02-17	630	Colplu
Harpia	15	7, 800	2015-02-17	645	Colplu
Harpia	15	7, 800	2015-02-17	700	Colplu
Harpia	15	7, 800	2015-02-17	715	Colplu
Harpia	15	7, 800	2015-02-17	730	Colplu
Harpia	15	7, 800	2015-02-17	745	Colplu
Harpia	15	7, 800	2015-02-17	800	Colplu
Harpia	15	8, 200	2015-02-12	630	Colplu
Harpia	15	8, 200	2015-02-10	700	Colplu
Harpia	15	8, 200	2015-02-10	745	Colplu
Harpia	15	8, 600	2015-02-16	800	Colplu
Harpia	15	9, -50	2015-02-07	630	Colplu
Harpia	15	9, -50	2015-02-07	645	Colplu
Harpia	15	9, -50	2015-02-07	700	Colplu
Harpia	15	9, -50	2015-02-07	715	Colplu
Harpia	15	9, -50	2015-02-07	730	Colplu
Harpia	15	9, -50	2015-02-07	800	Colplu
Harpia	15	9, 400	2015-02-13	600	Colplu
Harpia	15	9, 400	2015-02-13	645	Colplu
Harpia	15	9, 400	2015-02-13	730	Colplu
Harpia	15	9, 400	2015-02-13	745	Colplu
Harpia	15	9, 400	2015-02-13	800	Colplu
Harpia	15	9, 800	2015-02-17	700	Colplu
Harpia	15	9, 800	2015-02-17	715	Colplu
Harpia	15	9, 800	2015-02-17	730	Colplu
Harpia	15	9, 800	2015-02-17	745	Colplu
Harpia	15	9, 800	2015-02-17	800	Colplu
Harpia	15	10, 200	2015-02-12	715	Colplu
Harpia	15	10, 200	2015-02-12	730	Colplu
Harpia	15	10, 200	2015-02-12	800	Colplu
Harpia	15	1, -50	2015-02-07	645	Cortor
Harpia	15	1, -50	2015-02-07	715	Cortor
Harpia	15	1, -50	2015-02-07	730	Cortor
Harpia	15	3, 800	2015-02-17	645	Cortor
Harpia	15	4, 600	2015-02-16	800	Cortor
Harpia	15	10, 600	2015-02-16	630	Cortor
Harpia	15	5, 400	2015-02-13	545	Crycin
Harpia	15	7, 400	2015-02-13	745	Crycin
Harpia	15	2, 200	2015-02-17	615	Crysou
Harpia	15	2, 600	2015-02-16	630	Crysou
Harpia	15	2, 600	2015-02-16	645	Crysou
Harpia	15	2, 600	2015-02-16	700	Crysou
Harpia	15	3, -50	2015-02-07	545	Crysou
Harpia	15	4, 600	2015-02-16	645	Crysou
Harpia	15	4, 600	2015-02-16	700	Crysou
Harpia	15	4, 600	2015-02-16	745	Crysou
Harpia	15	4, 600	2015-02-16	800	Crysou
Harpia	15	5, -50	2015-02-07	545	Crysou
Harpia	15	5, 400	2015-02-13	600	Crysou
Harpia	15	5, 400	2015-02-13	615	Crysou
Harpia	15	5, 800	2015-02-17	700	Crysou
Harpia	15	6, 600	2015-02-16	745	Crysou
Harpia	15	1, -50	2015-02-07	545	Cryvar
Harpia	15	1, 400	2015-02-13	600	Cryvar
Harpia	15	1, 800	2015-02-17	545	Cryvar
Harpia	15	1, 800	2015-02-17	600	Cryvar
Harpia	15	3, -50	2015-02-07	545	Cryvar
Harpia	15	3, -50	2015-02-07	600	Cryvar
Harpia	15	3, 400	2015-02-13	630	Cryvar
Harpia	15	4, 200	2015-02-12	630	Cryvar
Harpia	15	4, 200	2015-02-12	800	Cryvar
Harpia	15	4, 600	2015-02-16	630	Cryvar
Harpia	15	5, -50	2015-02-07	545	Cryvar
Harpia	15	5, 400	2015-02-13	615	Cryvar
Harpia	15	5, 400	2015-02-13	630	Cryvar
Harpia	15	5, 400	2015-02-13	715	Cryvar
Harpia	15	6, 200	2015-02-12	745	Cryvar
Harpia	15	6, 200	2015-02-12	800	Cryvar
Harpia	15	6, 600	2015-02-16	630	Cryvar
Harpia	15	6, 600	2015-02-16	645	Cryvar
Harpia	15	7, 400	2015-02-13	630	Cryvar
Harpia	15	7, 800	2015-02-17	600	Cryvar
Harpia	15	8, 200	2015-02-12	600	Cryvar
Harpia	15	8, 200	2015-02-12	615	Cryvar
Harpia	15	8, 600	2015-02-16	715	Cryvar
Harpia	15	9, 400	2015-02-13	630	Cryvar
Harpia	15	10, 600	2015-02-16	730	Cryvar
Harpia	15	1, 800	2015-02-17	715	Cyacya
Harpia	15	2, 200	2015-02-17	700	Cyacya
Harpia	15	2, 600	2015-02-16	800	Cyacya
Harpia	15	3, 800	2015-02-17	615	Cyacya
Harpia	15	3, 800	2015-02-17	645	Cyacya
Harpia	15	4, 600	2015-02-16	645	Cyacya
Harpia	15	4, 600	2015-02-16	700	Cyacya
Harpia	15	4, 600	2015-02-16	745	Cyacya
Harpia	15	5, -50	2015-02-07	700	Cyacya
Harpia	15	5, -50	2015-02-07	715	Cyacya
Harpia	15	5, -50	2015-02-07	730	Cyacya
Harpia	15	5, -50	2015-02-07	800	Cyacya
Harpia	15	5, 800	2015-02-17	645	Cyacya
Harpia	15	5, 800	2015-02-17	700	Cyacya
Harpia	15	5, 800	2015-02-17	730	Cyacya
Harpia	15	5, 800	2015-02-17	745	Cyacya
Harpia	15	5, 800	2015-02-17	800	Cyacya
Harpia	15	6, 200	2015-02-12	800	Cyacya
Harpia	15	7, -50	2015-02-07	700	Cyacya
Harpia	15	7, -50	2015-02-07	715	Cyacya
Harpia	15	1, -50	2015-02-07	600	Cymlin
Harpia	15	1, -50	2015-02-07	615	Cymlin
Harpia	15	1, -50	2015-02-07	645	Cymlin
Harpia	15	1, -50	2015-02-07	700	Cymlin
Harpia	15	1, -50	2015-02-07	730	Cymlin
Harpia	15	1, -50	2015-02-07	745	Cymlin
Harpia	15	1, -50	2015-02-07	800	Cymlin
Harpia	15	1, 400	2015-02-13	600	Cymlin
Harpia	15	1, 400	2015-02-13	645	Cymlin
Harpia	15	1, 400	2015-02-13	700	Cymlin
Harpia	15	1, 400	2015-02-13	730	Cymlin
Harpia	15	1, 400	2015-02-13	800	Cymlin
Harpia	15	1, 800	2015-02-17	615	Cymlin
Harpia	15	1, 800	2015-02-17	645	Cymlin
Harpia	15	1, 800	2015-02-17	745	Cymlin
Harpia	15	1, 800	2015-02-17	800	Cymlin
Harpia	15	2, 600	2015-02-16	730	Cymlin
Harpia	15	2, 600	2015-02-16	745	Cymlin
Harpia	15	2, 600	2015-02-16	800	Cymlin
Harpia	15	3, 400	2015-02-13	615	Cymlin
Harpia	15	3, 400	2015-02-13	645	Cymlin
Harpia	15	3, 400	2015-02-13	700	Cymlin
Harpia	15	3, 800	2015-02-17	600	Cymlin
Harpia	15	3, 800	2015-02-17	615	Cymlin
Harpia	15	3, 800	2015-02-17	630	Cymlin
Harpia	15	3, 800	2015-02-17	645	Cymlin
Harpia	15	3, 800	2015-02-17	700	Cymlin
Harpia	15	5, 400	2015-02-13	600	Cymlin
Harpia	15	5, 400	2015-02-13	615	Cymlin
Harpia	15	5, 400	2015-02-13	630	Cymlin
Harpia	15	5, 800	2015-02-17	600	Cymlin
Harpia	15	5, 800	2015-02-17	615	Cymlin
Harpia	15	5, 800	2015-02-17	630	Cymlin
Harpia	15	5, 800	2015-02-17	645	Cymlin
Harpia	15	6, 200	2015-02-12	615	Cymlin
Harpia	15	6, 200	2015-02-12	715	Cymlin
Harpia	15	6, 600	2015-02-16	600	Cymlin
Harpia	15	7, -50	2015-02-07	630	Cymlin
Harpia	15	7, -50	2015-02-07	645	Cymlin
Harpia	15	7, -50	2015-02-07	730	Cymlin
Harpia	15	7, -50	2015-02-07	745	Cymlin
Harpia	15	7, -50	2015-02-07	800	Cymlin
Harpia	15	7, 400	2015-02-13	615	Cymlin
Harpia	15	8, 200	2015-02-12	615	Cymlin
Harpia	15	8, 200	2015-02-12	630	Cymlin
Harpia	15	8, 200	2015-02-12	645	Cymlin
Harpia	15	8, 200	2015-02-10	700	Cymlin
Harpia	15	8, 200	2015-02-10	715	Cymlin
Harpia	15	8, 200	2015-02-10	730	Cymlin
Harpia	15	8, 600	2015-02-16	600	Cymlin
Harpia	15	8, 600	2015-02-16	615	Cymlin
Harpia	15	8, 600	2015-02-16	715	Cymlin
Harpia	15	8, 600	2015-02-16	745	Cymlin
Harpia	15	8, 600	2015-02-16	800	Cymlin
Harpia	15	9, -50	2015-02-07	600	Cymlin
Harpia	15	9, -50	2015-02-07	615	Cymlin
Harpia	15	9, -50	2015-02-07	630	Cymlin
Harpia	15	9, -50	2015-02-07	645	Cymlin
Harpia	15	9, -50	2015-02-07	700	Cymlin
Harpia	15	9, -50	2015-02-07	715	Cymlin
Harpia	15	9, -50	2015-02-07	730	Cymlin
Harpia	15	9, -50	2015-02-07	745	Cymlin
Harpia	15	9, -50	2015-02-07	800	Cymlin
Harpia	15	9, 400	2015-02-13	745	Cymlin
Harpia	15	9, 400	2015-02-13	800	Cymlin
Harpia	15	3, -50	2015-02-07	545	Dapame
Harpia	15	3, -50	2015-02-07	600	Dapame
Harpia	15	3, 400	2015-02-13	615	Dapame
Harpia	15	4, 200	2015-02-12	600	Dapame
Harpia	15	5, -50	2015-02-07	545	Dapame
Harpia	15	5, -50	2015-02-07	600	Dapame
Harpia	15	5, 400	2015-02-13	615	Dapame
Harpia	15	5, 400	2015-02-13	730	Dapame
Harpia	15	6, 200	2015-02-12	600	Dapame
Harpia	15	7, -50	2015-02-07	545	Dapame
Harpia	15	8, 200	2015-02-12	600	Dapame
Harpia	15	10, 600	2015-02-16	730	Dapame
Harpia	15	7, -50	2015-02-07	615	Declon
Harpia	15	2, 600	2015-02-16	545	Dencer
Harpia	15	3, 400	2015-02-13	600	Dencer
Harpia	15	4, 200	2015-02-12	615	Dencer
Harpia	15	4, 600	2015-02-16	545	Dencer
Harpia	15	4, 600	2015-02-16	600	Dencer
Harpia	15	4, 600	2015-02-16	615	Dencer
Harpia	15	4, 600	2015-02-16	800	Dencer
Harpia	15	5, -50	2015-02-07	600	Dencer
Harpia	15	5, 800	2015-02-17	600	Dencer
Harpia	15	5, 800	2015-02-17	615	Dencer
Harpia	15	5, 800	2015-02-17	630	Dencer
Harpia	15	5, 800	2015-02-17	700	Dencer
Harpia	15	6, 600	2015-02-16	545	Dencer
Harpia	15	6, 600	2015-02-16	615	Dencer
Harpia	15	7, -50	2015-02-07	545	Dencer
Harpia	15	7, -50	2015-02-07	600	Dencer
Harpia	15	7, -50	2015-02-07	615	Dencer
Harpia	15	7, 800	2015-02-17	545	Dencer
Harpia	15	1, 800	2015-02-17	600	Denruf
Harpia	15	3, 800	2015-02-17	600	Denruf
Harpia	15	4, 600	2015-02-16	600	Denruf
Harpia	15	5, -50	2015-02-07	545	Denruf
Harpia	15	5, 400	2015-02-13	600	Denruf
Harpia	15	5, 400	2015-02-13	615	Denruf
Harpia	15	5, 400	2015-02-13	630	Denruf
Harpia	15	5, 400	2015-02-13	700	Denruf
Harpia	15	5, 400	2015-02-13	730	Denruf
Harpia	15	6, 600	2015-02-16	600	Denruf
Harpia	15	6, 600	2015-02-16	615	Denruf
Harpia	15	6, 600	2015-02-16	630	Denruf
Harpia	15	6, 600	2015-02-16	730	Denruf
Harpia	15	7, -50	2015-02-07	545	Denruf
Harpia	15	7, -50	2015-02-07	600	Denruf
Harpia	15	7, -50	2015-02-07	615	Denruf
Harpia	15	7, 400	2015-02-13	600	Denruf
Harpia	15	7, 800	2015-02-17	615	Denruf
Harpia	15	8, 600	2015-02-16	600	Denruf
Harpia	15	9, -50	2015-02-07	600	Denruf
Harpia	15	9, -50	2015-02-07	615	Denruf
Harpia	15	9, -50	2015-02-07	645	Denruf
Harpia	15	9, 400	2015-02-13	600	Denruf
Harpia	15	10, 600	2015-02-16	600	Denruf
Harpia	15	9, 400	2015-02-13	615	Diccin
Harpia	15	9, 400	2015-02-13	630	Diccin
Harpia	15	9, 400	2015-02-13	645	Diccin
Harpia	15	9, 400	2015-02-13	700	Diccin
Harpia	15	9, 400	2015-02-13	730	Diccin
Harpia	15	9, 800	2015-02-17	730	Diccin
Harpia	15	9, 800	2015-02-17	745	Diccin
Harpia	15	10, 600	2015-02-16	730	Diccin
Harpia	15	1, -50	2015-02-07	745	Eupruf
Harpia	15	3, 400	2015-02-13	645	Eupruf
Harpia	15	3, 800	2015-02-17	800	Eupruf
Harpia	15	5, 800	2015-02-17	800	Eupruf
Harpia	15	6, 200	2015-02-12	630	Eupruf
Harpia	15	6, 200	2015-02-12	645	Eupruf
Harpia	15	6, 200	2015-02-12	800	Eupruf
Harpia	15	9, 400	2015-02-13	715	Eupruf
Harpia	15	1, -50	2015-02-07	730	Eupxan
Harpia	15	3, 800	2015-02-17	630	Eupxan
Harpia	15	3, 800	2015-02-17	700	Eupxan
Harpia	15	4, 600	2015-02-16	715	Eupxan
Harpia	15	4, 600	2015-02-16	800	Eupxan
Harpia	15	10, 200	2015-02-12	745	Eupxan
Harpia	15	3, -50	2015-02-07	600	Forana
Harpia	15	2, 600	2015-02-16	730	Forcol
Harpia	15	3, 800	2015-02-17	630	Forcol
Harpia	15	6, 600	2015-02-16	630	Forcol
Harpia	15	8, 600	2015-02-16	615	Forcol
Harpia	15	8, 600	2015-02-16	645	Forcol
Harpia	15	10, 600	2015-02-16	630	Forcol
Harpia	15	10, 600	2015-02-16	645	Forcol
Harpia	15	2, 200	2015-02-17	600	Freund
Harpia	15	2, 200	2015-02-17	615	Freund
Harpia	15	6, 200	2015-02-12	645	Freund
Harpia	15	7, -50	2015-02-07	615	Freund
Harpia	15	8, 200	2015-02-12	600	Freund
Harpia	15	8, 200	2015-02-12	615	Freund
Harpia	15	9, 800	2015-02-17	600	Freund
Harpia	15	9, 800	2015-02-17	615	Freund
Harpia	15	10, 200	2015-02-12	615	Freund
Harpia	15	3, 800	2015-02-17	745	Galalb
Harpia	15	3, 800	2015-02-17	800	Galalb
Harpia	15	4, 200	2015-02-12	600	Galalb
Harpia	15	4, 200	2015-02-12	700	Galalb
Harpia	15	9, -50	2015-02-07	715	Galalb
Harpia	15	9, -50	2015-02-07	730	Galalb
Harpia	15	9, -50	2015-02-07	800	Galalb
Harpia	15	9, 400	2015-02-13	745	Galalb
Harpia	15	9, 400	2015-02-13	800	Galalb
Harpia	15	10, 600	2015-02-16	600	Galalb
Harpia	15	1, -50	2015-02-07	615	Geomon
Harpia	15	1, -50	2015-02-07	630	Geomon
Harpia	15	1, -50	2015-02-07	645	Geomon
Harpia	15	1, 400	2015-02-13	630	Geomon
Harpia	15	1, 400	2015-02-13	645	Geomon
Harpia	15	1, 400	2015-02-13	700	Geomon
Harpia	15	1, 400	2015-02-13	715	Geomon
Harpia	15	1, 400	2015-02-13	730	Geomon
Harpia	15	1, 400	2015-02-13	745	Geomon
Harpia	15	1, 400	2015-02-13	800	Geomon
Harpia	15	1, 800	2015-02-17	545	Geomon
Harpia	15	1, 800	2015-02-17	600	Geomon
Harpia	15	1, 800	2015-02-17	615	Geomon
Harpia	15	1, 800	2015-02-17	630	Geomon
Harpia	15	1, 800	2015-02-17	645	Geomon
Harpia	15	1, 800	2015-02-17	700	Geomon
Harpia	15	1, 800	2015-02-17	715	Geomon
Harpia	15	1, 800	2015-02-17	745	Geomon
Harpia	15	1, 800	2015-02-17	800	Geomon
Harpia	15	2, 200	2015-02-17	600	Geomon
Harpia	15	2, 200	2015-02-17	615	Geomon
Harpia	15	2, 600	2015-02-16	615	Geomon
Harpia	15	2, 600	2015-02-16	630	Geomon
Harpia	15	3, -50	2015-02-07	630	Geomon
Harpia	15	3, 400	2015-02-13	545	Geomon
Harpia	15	3, 400	2015-02-13	600	Geomon
Harpia	15	3, 400	2015-02-13	615	Geomon
Harpia	15	3, 400	2015-02-13	630	Geomon
Harpia	15	3, 400	2015-02-13	645	Geomon
Harpia	15	3, 400	2015-02-13	700	Geomon
Harpia	15	3, 400	2015-02-13	715	Geomon
Harpia	15	3, 400	2015-02-13	730	Geomon
Harpia	15	3, 400	2015-02-13	745	Geomon
Harpia	15	3, 400	2015-02-13	800	Geomon
Harpia	15	3, 800	2015-02-17	630	Geomon
Harpia	15	3, 800	2015-02-17	645	Geomon
Harpia	15	3, 800	2015-02-17	700	Geomon
Harpia	15	3, 800	2015-02-17	715	Geomon
Harpia	15	3, 800	2015-02-17	730	Geomon
Harpia	15	3, 800	2015-02-17	745	Geomon
Harpia	15	3, 800	2015-02-17	800	Geomon
Harpia	15	4, 600	2015-02-16	600	Geomon
Harpia	15	4, 600	2015-02-16	615	Geomon
Harpia	15	4, 600	2015-02-16	630	Geomon
Harpia	15	5, -50	2015-02-07	630	Geomon
Harpia	15	5, 400	2015-02-13	545	Geomon
Harpia	15	5, 400	2015-02-13	600	Geomon
Harpia	15	5, 400	2015-02-13	615	Geomon
Harpia	15	5, 400	2015-02-13	645	Geomon
Harpia	15	5, 800	2015-02-17	615	Geomon
Harpia	15	5, 800	2015-02-17	630	Geomon
Harpia	15	5, 800	2015-02-17	645	Geomon
Harpia	15	5, 800	2015-02-17	700	Geomon
Harpia	15	5, 800	2015-02-17	715	Geomon
Harpia	15	5, 800	2015-02-17	730	Geomon
Harpia	15	5, 800	2015-02-17	745	Geomon
Harpia	15	6, 200	2015-02-12	645	Geomon
Harpia	15	6, 600	2015-02-16	615	Geomon
Harpia	15	6, 600	2015-02-16	630	Geomon
Harpia	15	7, -50	2015-02-07	600	Geomon
Harpia	15	7, -50	2015-02-07	615	Geomon
Harpia	15	7, -50	2015-02-07	630	Geomon
Harpia	15	7, -50	2015-02-07	645	Geomon
Harpia	15	7, -50	2015-02-07	700	Geomon
Harpia	15	7, 400	2015-02-13	630	Geomon
Harpia	15	7, 400	2015-02-13	645	Geomon
Harpia	15	7, 400	2015-02-13	700	Geomon
Harpia	15	7, 400	2015-02-13	715	Geomon
Harpia	15	7, 400	2015-02-13	730	Geomon
Harpia	15	7, 400	2015-02-13	745	Geomon
Harpia	15	7, 400	2015-02-13	800	Geomon
Harpia	15	7, 800	2015-02-17	615	Geomon
Harpia	15	7, 800	2015-02-17	630	Geomon
Harpia	15	7, 800	2015-02-17	645	Geomon
Harpia	15	7, 800	2015-02-17	700	Geomon
Harpia	15	7, 800	2015-02-17	715	Geomon
Harpia	15	7, 800	2015-02-17	730	Geomon
Harpia	15	7, 800	2015-02-17	745	Geomon
Harpia	15	7, 800	2015-02-17	800	Geomon
Harpia	15	8, 200	2015-02-12	645	Geomon
Harpia	15	8, 600	2015-02-16	615	Geomon
Harpia	15	8, 600	2015-02-16	630	Geomon
Harpia	15	8, 600	2015-02-16	645	Geomon
Harpia	15	9, -50	2015-02-07	600	Geomon
Harpia	15	9, -50	2015-02-07	630	Geomon
Harpia	15	9, -50	2015-02-07	645	Geomon
Harpia	15	9, -50	2015-02-07	700	Geomon
Harpia	15	9, -50	2015-02-07	715	Geomon
Harpia	15	9, -50	2015-02-07	730	Geomon
Harpia	15	9, -50	2015-02-07	745	Geomon
Harpia	15	9, 800	2015-02-17	600	Geomon
Harpia	15	9, 800	2015-02-17	615	Geomon
Harpia	15	9, 800	2015-02-17	630	Geomon
Harpia	15	9, 800	2015-02-17	645	Geomon
Harpia	15	9, 800	2015-02-17	700	Geomon
Harpia	15	9, 800	2015-02-17	715	Geomon
Harpia	15	10, 200	2015-02-12	615	Geomon
Harpia	15	10, 200	2015-02-12	630	Geomon
Harpia	15	10, 200	2015-02-12	700	Geomon
Harpia	15	10, 600	2015-02-16	600	Geomon
Harpia	15	10, 600	2015-02-16	615	Geomon
Harpia	15	10, 600	2015-02-16	630	Geomon
Harpia	15	10, 600	2015-02-16	645	Geomon
Harpia	15	10, 600	2015-02-16	730	Geomon
Harpia	15	10, 600	2015-02-16	745	Geomon
Harpia	15	3, -50	2015-02-07	545	Glabra
Harpia	15	1, -50	2015-02-07	600	Glyspi
Harpia	15	1, -50	2015-02-07	730	Glyspi
Harpia	15	1, -50	2015-02-07	745	Glyspi
Harpia	15	1, -50	2015-02-07	800	Glyspi
Harpia	15	1, 400	2015-02-13	730	Glyspi
Harpia	15	1, 800	2015-02-17	715	Glyspi
Harpia	15	2, 200	2015-02-17	630	Glyspi
Harpia	15	2, 200	2015-02-17	715	Glyspi
Harpia	15	2, 600	2015-02-16	630	Glyspi
Harpia	15	2, 600	2015-02-16	645	Glyspi
Harpia	15	2, 600	2015-02-16	700	Glyspi
Harpia	15	3, -50	2015-02-07	630	Glyspi
Harpia	15	3, -50	2015-02-07	645	Glyspi
Harpia	15	3, -50	2015-02-07	700	Glyspi
Harpia	15	3, -50	2015-02-07	730	Glyspi
Harpia	15	3, 400	2015-02-13	600	Glyspi
Harpia	15	3, 400	2015-02-13	615	Glyspi
Harpia	15	3, 400	2015-02-13	630	Glyspi
Harpia	15	3, 400	2015-02-13	730	Glyspi
Harpia	15	3, 800	2015-02-17	615	Glyspi
Harpia	15	4, 600	2015-02-16	600	Glyspi
Harpia	15	4, 600	2015-02-16	615	Glyspi
Harpia	15	4, 600	2015-02-16	630	Glyspi
Harpia	15	4, 600	2015-02-16	700	Glyspi
Harpia	15	4, 600	2015-02-16	715	Glyspi
Harpia	15	4, 600	2015-02-16	730	Glyspi
Harpia	15	5, 400	2015-02-13	600	Glyspi
Harpia	15	5, 400	2015-02-13	615	Glyspi
Harpia	15	5, 400	2015-02-13	630	Glyspi
Harpia	15	5, 400	2015-02-13	745	Glyspi
Harpia	15	5, 800	2015-02-17	600	Glyspi
Harpia	15	5, 800	2015-02-17	630	Glyspi
Harpia	15	6, 200	2015-02-12	630	Glyspi
Harpia	15	6, 200	2015-02-12	645	Glyspi
Harpia	15	6, 600	2015-02-16	615	Glyspi
Harpia	15	7, -50	2015-02-07	615	Glyspi
Harpia	15	7, -50	2015-02-07	630	Glyspi
Harpia	15	7, -50	2015-02-07	645	Glyspi
Harpia	15	7, -50	2015-02-07	700	Glyspi
Harpia	15	7, 800	2015-02-17	615	Glyspi
Harpia	15	8, 200	2015-02-12	630	Glyspi
Harpia	15	8, 600	2015-02-16	630	Glyspi
Harpia	15	8, 600	2015-02-16	645	Glyspi
Harpia	15	8, 600	2015-02-16	700	Glyspi
Harpia	15	9, -50	2015-02-07	645	Glyspi
Harpia	15	9, -50	2015-02-07	700	Glyspi
Harpia	15	9, -50	2015-02-07	800	Glyspi
Harpia	15	10, 200	2015-02-12	630	Glyspi
Harpia	15	10, 200	2015-02-12	645	Glyspi
Harpia	15	10, 200	2015-02-12	745	Glyspi
Harpia	15	10, 200	2015-02-12	800	Glyspi
Harpia	15	1, 400	2015-02-13	600	Gradig
Harpia	15	1, 400	2015-02-13	715	Gradig
Harpia	15	1, 400	2015-02-13	730	Gradig
Harpia	15	1, 400	2015-02-13	745	Gradig
Harpia	15	1, 400	2015-02-13	800	Gradig
Harpia	15	2, 200	2015-02-17	715	Gradig
Harpia	15	2, 200	2015-02-17	745	Gradig
Harpia	15	2, 200	2015-02-17	800	Gradig
Harpia	15	9, -50	2015-02-07	600	Gradig
Harpia	15	1, 400	2015-02-13	700	Gymleu
Harpia	15	4, 200	2015-02-12	630	Gymleu
Harpia	15	5, 800	2015-02-17	700	Gymleu
Harpia	15	4, 200	2015-02-12	615	Hemzos
Harpia	15	4, 200	2015-02-12	630	Hemzos
Harpia	15	4, 200	2015-02-12	645	Hemzos
Harpia	15	4, 200	2015-02-12	700	Hemzos
Harpia	15	4, 200	2015-02-12	715	Hemzos
Harpia	15	4, 200	2015-02-12	730	Hemzos
Harpia	15	4, 200	2015-02-12	745	Hemzos
Harpia	15	4, 200	2015-02-12	800	Hemzos
Harpia	15	7, -50	2015-02-07	600	Hemzos
Harpia	15	7, -50	2015-02-07	615	Hemzos
Harpia	15	7, 400	2015-02-13	730	Hemzos
Harpia	15	8, 200	2015-02-10	700	Hemzos
Harpia	15	9, -50	2015-02-07	715	Hemzos
Harpia	15	9, 400	2015-02-13	730	Hemzos
Harpia	15	10, 200	2015-02-12	700	Hemzos
Harpia	15	10, 200	2015-02-12	715	Hemzos
Harpia	15	10, 200	2015-02-12	730	Hemzos
Harpia	15	10, 200	2015-02-12	745	Hemzos
Harpia	15	10, 600	2015-02-16	715	Hemzos
Harpia	15	10, 600	2015-02-16	730	Hemzos
Harpia	15	2, 200	2015-02-17	645	Henleu
Harpia	15	2, 200	2015-02-17	700	Henleu
Harpia	15	3, -50	2015-02-07	615	Henleu
Harpia	15	3, -50	2015-02-07	630	Henleu
Harpia	15	3, 400	2015-02-13	715	Henleu
Harpia	15	3, 800	2015-02-17	715	Henleu
Harpia	15	5, -50	2015-02-07	700	Henleu
Harpia	15	6, 200	2015-02-12	715	Henleu
Harpia	15	6, 200	2015-02-12	730	Henleu
Harpia	15	6, 200	2015-02-12	745	Henleu
Harpia	15	6, 200	2015-02-12	800	Henleu
Harpia	15	7, 400	2015-02-13	615	Henleu
Harpia	15	7, 400	2015-02-13	630	Henleu
Harpia	15	7, 400	2015-02-13	645	Henleu
Harpia	15	7, 800	2015-02-17	645	Henleu
Harpia	15	7, 800	2015-02-17	700	Henleu
Harpia	15	7, 800	2015-02-17	715	Henleu
Harpia	15	7, 800	2015-02-17	730	Henleu
Harpia	15	7, 800	2015-02-17	745	Henleu
Harpia	15	7, 800	2015-02-17	800	Henleu
Harpia	15	8, 200	2015-02-12	645	Henleu
Harpia	15	8, 200	2015-02-10	700	Henleu
Harpia	15	8, 200	2015-02-10	715	Henleu
Harpia	15	8, 200	2015-02-10	730	Henleu
Harpia	15	8, 200	2015-02-10	745	Henleu
Harpia	15	8, 200	2015-02-10	800	Henleu
Harpia	15	8, 600	2015-02-16	630	Henleu
Harpia	15	9, 800	2015-02-17	615	Henleu
Harpia	15	9, 800	2015-02-17	630	Henleu
Harpia	15	9, 800	2015-02-17	645	Henleu
Harpia	15	10, 600	2015-02-16	615	Henleu
Harpia	15	2, 200	2015-02-17	545	Hercac
Harpia	15	2, 200	2015-02-17	645	Hercac
Harpia	15	2, 200	2015-02-17	745	Hercac
Harpia	15	1, -50	2015-02-07	745	Hylhyp
Harpia	15	1, 800	2015-02-17	615	Hylhyp
Harpia	15	1, 800	2015-02-17	730	Hylhyp
Harpia	15	1, 800	2015-02-17	745	Hylhyp
Harpia	15	2, 600	2015-02-16	745	Hylhyp
Harpia	15	3, -50	2015-02-07	730	Hylhyp
Harpia	15	3, -50	2015-02-07	745	Hylhyp
Harpia	15	3, -50	2015-02-07	800	Hylhyp
Harpia	15	3, 400	2015-02-13	630	Hylhyp
Harpia	15	3, 400	2015-02-13	645	Hylhyp
Harpia	15	3, 800	2015-02-17	700	Hylhyp
Harpia	15	3, 800	2015-02-17	715	Hylhyp
Harpia	15	3, 800	2015-02-17	730	Hylhyp
Harpia	15	4, 600	2015-02-16	700	Hylhyp
Harpia	15	4, 600	2015-02-16	730	Hylhyp
Harpia	15	4, 600	2015-02-16	745	Hylhyp
Harpia	15	5, -50	2015-02-07	700	Hylhyp
Harpia	15	6, 200	2015-02-12	645	Hylhyp
Harpia	15	6, 200	2015-02-12	700	Hylhyp
Harpia	15	6, 600	2015-02-16	645	Hylhyp
Harpia	15	6, 600	2015-02-16	715	Hylhyp
Harpia	15	6, 600	2015-02-16	730	Hylhyp
Harpia	15	7, -50	2015-02-07	630	Hylhyp
Harpia	15	10, 600	2015-02-16	630	Hylhyp
Harpia	15	1, 800	2015-02-17	615	Hylnae
Harpia	15	2, 600	2015-02-16	800	Hylnae
Harpia	15	3, -50	2015-02-07	630	Hylnae
Harpia	15	3, 400	2015-02-13	600	Hylnae
Harpia	15	3, 400	2015-02-13	615	Hylnae
Harpia	15	3, 400	2015-02-13	630	Hylnae
Harpia	15	3, 400	2015-02-13	645	Hylnae
Harpia	15	3, 400	2015-02-13	700	Hylnae
Harpia	15	4, 200	2015-02-12	715	Hylnae
Harpia	15	4, 600	2015-02-16	800	Hylnae
Harpia	15	5, -50	2015-02-07	615	Hylnae
Harpia	15	6, 600	2015-02-16	745	Hylnae
Harpia	15	7, -50	2015-02-07	700	Hylnae
Harpia	15	7, -50	2015-02-07	715	Hylnae
Harpia	15	7, 800	2015-02-17	615	Hylnae
Harpia	15	7, 800	2015-02-17	630	Hylnae
Harpia	15	8, 600	2015-02-16	715	Hylnae
Harpia	15	9, 400	2015-02-13	745	Hylnae
Harpia	15	9, 400	2015-02-13	800	Hylnae
Harpia	15	9, 800	2015-02-17	630	Hylnae
Harpia	15	1, 800	2015-02-17	630	Hyloch
Harpia	15	3, 400	2015-02-13	615	Hyloch
Harpia	15	3, 400	2015-02-13	645	Hyloch
Harpia	15	4, 600	2015-02-16	630	Hyloch
Harpia	15	4, 600	2015-02-16	645	Hyloch
Harpia	15	4, 600	2015-02-16	700	Hyloch
Harpia	15	4, 600	2015-02-16	715	Hyloch
Harpia	15	4, 600	2015-02-16	730	Hyloch
Harpia	15	4, 600	2015-02-16	745	Hyloch
Harpia	15	4, 600	2015-02-16	800	Hyloch
Harpia	15	5, 400	2015-02-13	745	Hyloch
Harpia	15	7, 400	2015-02-13	645	Hyloch
Harpia	15	7, 400	2015-02-13	700	Hyloch
Harpia	15	7, 400	2015-02-13	715	Hyloch
Harpia	15	7, 400	2015-02-13	730	Hyloch
Harpia	15	8, 600	2015-02-16	600	Hyloch
Harpia	15	8, 600	2015-02-16	615	Hyloch
Harpia	15	8, 600	2015-02-16	630	Hyloch
Harpia	15	9, 800	2015-02-17	615	Hyloch
Harpia	15	9, 800	2015-02-17	630	Hyloch
Harpia	15	10, 200	2015-02-12	645	Hyloch
Harpia	15	10, 200	2015-02-12	715	Hyloch
Harpia	15	10, 200	2015-02-12	730	Hyloch
Harpia	15	10, 200	2015-02-12	745	Hyloch
Harpia	15	1, -50	2015-02-07	600	Hylpoe
Harpia	15	1, -50	2015-02-07	615	Hylpoe
Harpia	15	1, -50	2015-02-07	630	Hylpoe
Harpia	15	1, -50	2015-02-07	700	Hylpoe
Harpia	15	1, 400	2015-02-13	630	Hylpoe
Harpia	15	1, 400	2015-02-13	645	Hylpoe
Harpia	15	1, 400	2015-02-13	715	Hylpoe
Harpia	15	1, 800	2015-02-17	600	Hylpoe
Harpia	15	1, 800	2015-02-17	615	Hylpoe
Harpia	15	2, 200	2015-02-17	615	Hylpoe
Harpia	15	2, 600	2015-02-16	630	Hylpoe
Harpia	15	2, 600	2015-02-16	800	Hylpoe
Harpia	15	3, -50	2015-02-07	630	Hylpoe
Harpia	15	3, 400	2015-02-13	645	Hylpoe
Harpia	15	3, 800	2015-02-17	615	Hylpoe
Harpia	15	3, 800	2015-02-17	715	Hylpoe
Harpia	15	3, 800	2015-02-17	730	Hylpoe
Harpia	15	3, 800	2015-02-17	745	Hylpoe
Harpia	15	4, 200	2015-02-12	545	Hylpoe
Harpia	15	4, 200	2015-02-12	600	Hylpoe
Harpia	15	4, 200	2015-02-12	615	Hylpoe
Harpia	15	4, 600	2015-02-16	600	Hylpoe
Harpia	15	4, 600	2015-02-16	615	Hylpoe
Harpia	15	4, 600	2015-02-16	700	Hylpoe
Harpia	15	4, 600	2015-02-16	715	Hylpoe
Harpia	15	4, 600	2015-02-16	745	Hylpoe
Harpia	15	5, -50	2015-02-07	600	Hylpoe
Harpia	15	5, -50	2015-02-07	615	Hylpoe
Harpia	15	5, -50	2015-02-07	630	Hylpoe
Harpia	15	5, -50	2015-02-07	645	Hylpoe
Harpia	15	5, -50	2015-02-07	730	Hylpoe
Harpia	15	5, 400	2015-02-13	715	Hylpoe
Harpia	15	5, 800	2015-02-17	715	Hylpoe
Harpia	15	5, 800	2015-02-17	800	Hylpoe
Harpia	15	6, 200	2015-02-12	745	Hylpoe
Harpia	15	6, 600	2015-02-16	615	Hylpoe
Harpia	15	7, 400	2015-02-13	615	Hylpoe
Harpia	15	7, 400	2015-02-13	630	Hylpoe
Harpia	15	7, 400	2015-02-13	645	Hylpoe
Harpia	15	7, 400	2015-02-13	700	Hylpoe
Harpia	15	7, 400	2015-02-13	715	Hylpoe
Harpia	15	7, 400	2015-02-13	730	Hylpoe
Harpia	15	7, 400	2015-02-13	800	Hylpoe
Harpia	15	7, 800	2015-02-17	615	Hylpoe
Harpia	15	7, 800	2015-02-17	645	Hylpoe
Harpia	15	7, 800	2015-02-17	700	Hylpoe
Harpia	15	7, 800	2015-02-17	715	Hylpoe
Harpia	15	8, 600	2015-02-16	600	Hylpoe
Harpia	15	8, 600	2015-02-16	615	Hylpoe
Harpia	15	8, 600	2015-02-16	630	Hylpoe
Harpia	15	8, 600	2015-02-16	730	Hylpoe
Harpia	15	9, -50	2015-02-07	630	Hylpoe
Harpia	15	9, 400	2015-02-13	715	Hylpoe
Harpia	15	9, 400	2015-02-13	745	Hylpoe
Harpia	15	9, 800	2015-02-17	630	Hylpoe
Harpia	15	9, 800	2015-02-17	645	Hylpoe
Harpia	15	9, 800	2015-02-17	730	Hylpoe
Harpia	15	9, 800	2015-02-17	800	Hylpoe
Harpia	15	10, 200	2015-02-12	600	Hylpoe
Harpia	15	10, 200	2015-02-12	615	Hylpoe
Harpia	15	10, 200	2015-02-12	630	Hylpoe
Harpia	15	10, 200	2015-02-12	645	Hylpoe
Harpia	15	10, 200	2015-02-12	700	Hylpoe
Harpia	15	10, 200	2015-02-12	715	Hylpoe
Harpia	15	10, 200	2015-02-12	730	Hylpoe
Harpia	15	10, 200	2015-02-12	745	Hylpoe
Harpia	15	10, 200	2015-02-12	800	Hylpoe
Harpia	15	10, 600	2015-02-16	615	Hylpoe
Harpia	15	10, 600	2015-02-16	645	Hylpoe
Harpia	15	10, 600	2015-02-16	745	Hylpoe
Harpia	15	2, 600	2015-02-16	600	Hylsub
Harpia	15	2, 600	2015-02-16	615	Hylsub
Harpia	15	3, 400	2015-02-13	600	Hylsub
Harpia	15	3, 400	2015-02-13	630	Hylsub
Harpia	15	4, 200	2015-02-12	600	Hylsub
Harpia	15	4, 200	2015-02-12	615	Hylsub
Harpia	15	5, -50	2015-02-07	615	Hylsub
Harpia	15	5, -50	2015-02-07	630	Hylsub
Harpia	15	5, -50	2015-02-07	700	Hylsub
Harpia	15	5, 400	2015-02-13	800	Hylsub
Harpia	15	5, 800	2015-02-17	600	Hylsub
Harpia	15	5, 800	2015-02-17	615	Hylsub
Harpia	15	6, 200	2015-02-12	600	Hylsub
Harpia	15	6, 200	2015-02-12	615	Hylsub
Harpia	15	6, 200	2015-02-12	645	Hylsub
Harpia	15	6, 200	2015-02-12	700	Hylsub
Harpia	15	6, 200	2015-02-12	730	Hylsub
Harpia	15	6, 200	2015-02-12	745	Hylsub
Harpia	15	7, 400	2015-02-13	600	Hylsub
Harpia	15	8, 200	2015-02-12	600	Hylsub
Harpia	15	9, -50	2015-02-07	600	Hylsub
Harpia	15	9, -50	2015-02-07	630	Hylsub
Harpia	15	1, -50	2015-02-07	615	Hypcan
Harpia	15	1, -50	2015-02-07	715	Hypcan
Harpia	15	1, 400	2015-02-13	615	Hypcan
Harpia	15	1, 800	2015-02-17	645	Hypcan
Harpia	15	3, 400	2015-02-13	615	Hypcan
Harpia	15	3, 400	2015-02-13	630	Hypcan
Harpia	15	3, 400	2015-02-13	730	Hypcan
Harpia	15	4, 200	2015-02-12	615	Hypcan
Harpia	15	4, 200	2015-02-12	630	Hypcan
Harpia	15	4, 600	2015-02-16	615	Hypcan
Harpia	15	5, 800	2015-02-17	600	Hypcan
Harpia	15	5, 800	2015-02-17	615	Hypcan
Harpia	15	5, 800	2015-02-17	630	Hypcan
Harpia	15	5, 800	2015-02-17	645	Hypcan
Harpia	15	5, 800	2015-02-17	700	Hypcan
Harpia	15	5, 800	2015-02-17	715	Hypcan
Harpia	15	5, 800	2015-02-17	730	Hypcan
Harpia	15	7, -50	2015-02-07	700	Hypcan
Harpia	15	7, -50	2015-02-07	800	Hypcan
Harpia	15	7, 400	2015-02-13	630	Hypcan
Harpia	15	7, 400	2015-02-13	645	Hypcan
Harpia	15	7, 400	2015-02-13	715	Hypcan
Harpia	15	7, 400	2015-02-13	730	Hypcan
Harpia	15	7, 800	2015-02-17	630	Hypcan
Harpia	15	7, 800	2015-02-17	645	Hypcan
Harpia	15	8, 600	2015-02-16	700	Hypcan
Harpia	15	8, 600	2015-02-16	715	Hypcan
Harpia	15	9, -50	2015-02-07	615	Hypcan
Harpia	15	9, -50	2015-02-07	630	Hypcan
Harpia	15	9, -50	2015-02-07	745	Hypcan
Harpia	15	9, 400	2015-02-13	600	Hypcan
Harpia	15	9, 400	2015-02-13	615	Hypcan
Harpia	15	9, 400	2015-02-13	630	Hypcan
Harpia	15	9, 400	2015-02-13	715	Hypcan
Harpia	15	9, 800	2015-02-17	615	Hypcan
Harpia	15	9, 800	2015-02-17	630	Hypcan
Harpia	15	9, 800	2015-02-17	700	Hypcan
Harpia	15	9, 800	2015-02-17	715	Hypcan
Harpia	15	9, 800	2015-02-17	730	Hypcan
Harpia	15	2, 600	2015-02-16	745	Hyphyp
Harpia	15	2, 600	2015-02-16	800	Hyphyp
Harpia	15	4, 200	2015-02-12	700	Hyphyp
Harpia	15	8, 200	2015-02-12	600	Hyphyp
Harpia	15	8, 200	2015-02-12	615	Hyphyp
Harpia	15	8, 200	2015-02-12	630	Hyphyp
Harpia	15	9, -50	2015-02-07	600	Hyphyp
Harpia	15	9, -50	2015-02-07	615	Hyphyp
Harpia	15	9, 400	2015-02-13	645	Hyphyp
Harpia	15	9, 400	2015-02-13	700	Hyphyp
Harpia	15	9, 400	2015-02-13	715	Hyphyp
Harpia	15	9, 400	2015-02-13	730	Hyphyp
Harpia	15	9, 400	2015-02-13	745	Hyphyp
Harpia	15	9, 400	2015-02-13	800	Hyphyp
Harpia	15	10, 200	2015-02-12	645	Hyphyp
Harpia	15	10, 600	2015-02-16	630	Hyphyp
Harpia	15	1, -50	2015-02-07	545	Jacaur
Harpia	15	1, -50	2015-02-07	615	Jacaur
Harpia	15	1, -50	2015-02-07	630	Jacaur
Harpia	15	1, -50	2015-02-07	645	Jacaur
Harpia	15	1, -50	2015-02-07	700	Jacaur
Harpia	15	1, -50	2015-02-07	745	Jacaur
Harpia	15	1, -50	2015-02-07	800	Jacaur
Harpia	15	1, 800	2015-02-17	600	Jacaur
Harpia	15	3, -50	2015-02-07	745	Jacaur
Harpia	15	5, 400	2015-02-13	600	Jacaur
Harpia	15	5, 400	2015-02-13	700	Jacaur
Harpia	15	10, 600	2015-02-16	600	Jacaur
Harpia	15	10, 600	2015-02-16	630	Jacaur
Harpia	15	5, 400	2015-02-13	800	Leumel
Harpia	15	2, 200	2015-02-17	645	Liotho
Harpia	15	2, 200	2015-02-17	700	Liotho
Harpia	15	2, 200	2015-02-17	700	Liotho
Harpia	15	2, 200	2015-02-17	715	Liotho
Harpia	15	2, 200	2015-02-17	730	Liotho
Harpia	15	2, 200	2015-02-17	745	Liotho
Harpia	15	2, 200	2015-02-17	800	Liotho
Harpia	15	2, 600	2015-02-16	745	Liotho
Harpia	15	3, -50	2015-02-07	600	Liotho
Harpia	15	3, -50	2015-02-07	615	Liotho
Harpia	15	3, -50	2015-02-07	630	Liotho
Harpia	15	3, -50	2015-02-07	645	Liotho
Harpia	15	3, -50	2015-02-07	700	Liotho
Harpia	15	3, -50	2015-02-07	715	Liotho
Harpia	15	3, -50	2015-02-07	730	Liotho
Harpia	15	3, -50	2015-02-07	745	Liotho
Harpia	15	3, -50	2015-02-07	800	Liotho
Harpia	15	3, 400	2015-02-13	600	Liotho
Harpia	15	3, 400	2015-02-13	615	Liotho
Harpia	15	3, 400	2015-02-13	630	Liotho
Harpia	15	3, 400	2015-02-13	645	Liotho
Harpia	15	3, 400	2015-02-13	700	Liotho
Harpia	15	3, 400	2015-02-13	715	Liotho
Harpia	15	3, 400	2015-02-13	730	Liotho
Harpia	15	3, 400	2015-02-13	745	Liotho
Harpia	15	3, 400	2015-02-13	800	Liotho
Harpia	15	3, 800	2015-02-17	615	Liotho
Harpia	15	4, 200	2015-02-12	630	Liotho
Harpia	15	4, 200	2015-02-12	645	Liotho
Harpia	15	4, 600	2015-02-16	745	Liotho
Harpia	15	5, -50	2015-02-07	730	Liotho
Harpia	15	5, -50	2015-02-07	745	Liotho
Harpia	15	5, -50	2015-02-07	800	Liotho
Harpia	15	5, 400	2015-02-13	600	Liotho
Harpia	15	5, 400	2015-02-13	615	Liotho
Harpia	15	5, 400	2015-02-13	630	Liotho
Harpia	15	5, 400	2015-02-13	645	Liotho
Harpia	15	5, 400	2015-02-13	700	Liotho
Harpia	15	5, 400	2015-02-13	715	Liotho
Harpia	15	5, 400	2015-02-13	730	Liotho
Harpia	15	5, 400	2015-02-13	745	Liotho
Harpia	15	5, 400	2015-02-13	800	Liotho
Harpia	15	6, 200	2015-02-12	630	Liotho
Harpia	15	6, 200	2015-02-12	645	Liotho
Harpia	15	6, 600	2015-02-16	600	Liotho
Harpia	15	7, -50	2015-02-07	715	Liotho
Harpia	15	7, -50	2015-02-07	730	Liotho
Harpia	15	7, -50	2015-02-07	745	Liotho
Harpia	15	7, -50	2015-02-07	800	Liotho
Harpia	15	7, 400	2015-02-13	600	Liotho
Harpia	15	7, 400	2015-02-13	615	Liotho
Harpia	15	7, 400	2015-02-13	630	Liotho
Harpia	15	7, 400	2015-02-13	645	Liotho
Harpia	15	7, 400	2015-02-13	700	Liotho
Harpia	15	7, 400	2015-02-13	715	Liotho
Harpia	15	8, 600	2015-02-16	715	Liotho
Harpia	15	9, -50	2015-02-07	600	Liotho
Harpia	15	9, -50	2015-02-07	615	Liotho
Harpia	15	9, -50	2015-02-07	630	Liotho
Harpia	15	9, -50	2015-02-07	645	Liotho
Harpia	15	9, -50	2015-02-07	700	Liotho
Harpia	15	9, -50	2015-02-07	715	Liotho
Harpia	15	9, -50	2015-02-07	730	Liotho
Harpia	15	9, -50	2015-02-07	745	Liotho
Harpia	15	9, -50	2015-02-07	800	Liotho
Harpia	15	10, 200	2015-02-12	715	Liotho
Harpia	15	10, 200	2015-02-12	730	Liotho
Harpia	15	10, 200	2015-02-12	745	Liotho
Harpia	15	10, 200	2015-02-12	800	Liotho
Harpia	15	3, 400	2015-02-13	645	Lipvoc
Harpia	15	4, 200	2015-02-12	630	Lipvoc
Harpia	15	4, 200	2015-02-12	645	Lipvoc
Harpia	15	5, -50	2015-02-07	615	Lipvoc
Harpia	15	5, -50	2015-02-07	630	Lipvoc
Harpia	15	5, -50	2015-02-07	745	Lipvoc
Harpia	15	5, 400	2015-02-13	600	Lipvoc
Harpia	15	5, 400	2015-02-13	645	Lipvoc
Harpia	15	5, 400	2015-02-13	715	Lipvoc
Harpia	15	5, 400	2015-02-13	745	Lipvoc
Harpia	15	6, 200	2015-02-12	645	Lipvoc
Harpia	15	6, 200	2015-02-12	700	Lipvoc
Harpia	15	6, 200	2015-02-12	745	Lipvoc
Harpia	15	6, 200	2015-02-12	800	Lipvoc
Harpia	15	6, 600	2015-02-16	700	Lipvoc
Harpia	15	6, 600	2015-02-16	730	Lipvoc
Harpia	15	6, 600	2015-02-16	745	Lipvoc
Harpia	15	7, -50	2015-02-07	600	Lipvoc
Harpia	15	7, -50	2015-02-07	615	Lipvoc
Harpia	15	7, -50	2015-02-07	630	Lipvoc
Harpia	15	7, -50	2015-02-07	645	Lipvoc
Harpia	15	7, -50	2015-02-07	700	Lipvoc
Harpia	15	7, -50	2015-02-07	715	Lipvoc
Harpia	15	7, -50	2015-02-07	730	Lipvoc
Harpia	15	7, -50	2015-02-07	745	Lipvoc
Harpia	15	7, -50	2015-02-07	800	Lipvoc
Harpia	15	7, 400	2015-02-13	600	Lipvoc
Harpia	15	7, 400	2015-02-13	615	Lipvoc
Harpia	15	7, 400	2015-02-13	645	Lipvoc
Harpia	15	7, 400	2015-02-13	700	Lipvoc
Harpia	15	7, 400	2015-02-13	715	Lipvoc
Harpia	15	7, 400	2015-02-13	730	Lipvoc
Harpia	15	7, 400	2015-02-13	745	Lipvoc
Harpia	15	7, 400	2015-02-13	800	Lipvoc
Harpia	15	7, 800	2015-02-17	745	Lipvoc
Harpia	15	8, 200	2015-02-12	615	Lipvoc
Harpia	15	8, 200	2015-02-12	630	Lipvoc
Harpia	15	8, 200	2015-02-12	645	Lipvoc
Harpia	15	8, 200	2015-02-10	700	Lipvoc
Harpia	15	8, 200	2015-02-10	715	Lipvoc
Harpia	15	8, 200	2015-02-10	730	Lipvoc
Harpia	15	8, 200	2015-02-10	745	Lipvoc
Harpia	15	8, 200	2015-02-10	800	Lipvoc
Harpia	15	8, 600	2015-02-16	700	Lipvoc
Harpia	15	8, 600	2015-02-16	730	Lipvoc
Harpia	15	8, 600	2015-02-16	800	Lipvoc
Harpia	15	9, -50	2015-02-07	615	Lipvoc
Harpia	15	9, -50	2015-02-07	630	Lipvoc
Harpia	15	9, -50	2015-02-07	645	Lipvoc
Harpia	15	9, -50	2015-02-07	700	Lipvoc
Harpia	15	9, -50	2015-02-07	715	Lipvoc
Harpia	15	9, -50	2015-02-07	730	Lipvoc
Harpia	15	9, -50	2015-02-07	745	Lipvoc
Harpia	15	9, 400	2015-02-13	600	Lipvoc
Harpia	15	9, 400	2015-02-13	615	Lipvoc
Harpia	15	9, 400	2015-02-13	630	Lipvoc
Harpia	15	9, 400	2015-02-13	700	Lipvoc
Harpia	15	9, 400	2015-02-13	715	Lipvoc
Harpia	15	9, 400	2015-02-13	730	Lipvoc
Harpia	15	9, 400	2015-02-13	745	Lipvoc
Harpia	15	9, 400	2015-02-13	800	Lipvoc
Harpia	15	9, 800	2015-02-17	615	Lipvoc
Harpia	15	9, 800	2015-02-17	630	Lipvoc
Harpia	15	9, 800	2015-02-17	745	Lipvoc
Harpia	15	10, 200	2015-02-12	615	Lipvoc
Harpia	15	10, 200	2015-02-12	700	Lipvoc
Harpia	15	10, 200	2015-02-12	745	Lipvoc
Harpia	15	10, 600	2015-02-16	600	Lipvoc
Harpia	15	10, 600	2015-02-16	615	Lipvoc
Harpia	15	10, 600	2015-02-16	700	Lipvoc
Harpia	15	10, 600	2015-02-16	730	Lipvoc
Harpia	15	10, 600	2015-02-16	800	Lipvoc
Harpia	15	1, 400	2015-02-13	545	Lopcri
Harpia	15	3, 400	2015-02-13	545	Lopcri
Harpia	15	4, 200	2015-02-12	545	Lopcri
Harpia	15	5, 400	2015-02-13	545	Lopcri
Harpia	15	8, 600	2015-02-16	545	Lopcri
Harpia	15	1, -50	2015-02-07	615	Lopvit
Harpia	15	1, -50	2015-02-07	630	Lopvit
Harpia	15	1, -50	2015-02-07	645	Lopvit
Harpia	15	1, -50	2015-02-07	700	Lopvit
Harpia	15	1, -50	2015-02-07	715	Lopvit
Harpia	15	1, -50	2015-02-07	745	Lopvit
Harpia	15	1, 400	2015-02-13	615	Lopvit
Harpia	15	1, 400	2015-02-13	630	Lopvit
Harpia	15	1, 400	2015-02-13	700	Lopvit
Harpia	15	1, 400	2015-02-13	715	Lopvit
Harpia	15	1, 400	2015-02-13	745	Lopvit
Harpia	15	1, 400	2015-02-13	800	Lopvit
Harpia	15	1, 800	2015-02-17	800	Lopvit
Harpia	15	2, 600	2015-02-16	645	Lopvit
Harpia	15	2, 600	2015-02-16	715	Lopvit
Harpia	15	2, 600	2015-02-16	730	Lopvit
Harpia	15	2, 600	2015-02-16	800	Lopvit
Harpia	15	3, -50	2015-02-07	615	Lopvit
Harpia	15	3, -50	2015-02-07	745	Lopvit
Harpia	15	3, 800	2015-02-17	600	Lopvit
Harpia	15	3, 800	2015-02-17	615	Lopvit
Harpia	15	3, 800	2015-02-17	800	Lopvit
Harpia	15	5, 800	2015-02-17	600	Lopvit
Harpia	15	5, 800	2015-02-17	615	Lopvit
Harpia	15	7, 400	2015-02-13	715	Lopvit
Harpia	15	2, 200	2015-02-17	800	Macreg
Harpia	15	1, 400	2015-02-13	615	Malfus
Harpia	15	3, -50	2015-02-07	745	Malfus
Harpia	15	3, 400	2015-02-13	715	Malfus
Harpia	15	5, -50	2015-02-07	600	Malfus
Harpia	15	5, 400	2015-02-13	600	Malfus
Harpia	15	5, 400	2015-02-13	615	Malfus
Harpia	15	5, 400	2015-02-13	630	Malfus
Harpia	15	7, 800	2015-02-17	600	Malfus
Harpia	15	7, 800	2015-02-17	615	Malfus
Harpia	15	9, -50	2015-02-07	615	Malfus
Harpia	15	9, 400	2015-02-13	615	Megmar
Harpia	15	1, -50	2015-02-07	730	Melcru
Harpia	15	1, -50	2015-02-07	800	Melcru
Harpia	15	1, 800	2015-02-17	745	Melcru
Harpia	15	1, 800	2015-02-17	800	Melcru
Harpia	15	2, 600	2015-02-16	730	Melcru
Harpia	15	2, 600	2015-02-16	745	Melcru
Harpia	15	2, 600	2015-02-16	800	Melcru
Harpia	15	3, -50	2015-02-07	715	Melcru
Harpia	15	3, -50	2015-02-07	730	Melcru
Harpia	15	4, 600	2015-02-16	730	Melcru
Harpia	15	4, 600	2015-02-16	745	Melcru
Harpia	15	4, 600	2015-02-16	800	Melcru
Harpia	15	5, 800	2015-02-17	645	Melcru
Harpia	15	5, 800	2015-02-17	700	Melcru
Harpia	15	5, 800	2015-02-17	800	Melcru
Harpia	15	9, 400	2015-02-13	700	Melcru
Harpia	15	3, 400	2015-02-13	600	Miccin
Harpia	15	7, 800	2015-02-17	645	Miccin
Harpia	15	10, 200	2015-02-12	745	Miccin
Harpia	15	8, 600	2015-02-16	545	Micgil
Harpia	15	8, 600	2015-02-16	630	Micgil
Harpia	15	8, 600	2015-02-16	700	Micgil
Harpia	15	8, 600	2015-02-16	800	Micgil
Harpia	15	9, 400	2015-02-13	545	Micgil
Harpia	15	9, 800	2015-02-17	545	Micgil
Harpia	15	9, 800	2015-02-17	600	Micgil
Harpia	15	9, 800	2015-02-17	645	Micgil
Harpia	15	10, 600	2015-02-16	545	Micgil
Harpia	15	10, 600	2015-02-16	600	Micgil
Harpia	15	10, 600	2015-02-16	630	Micgil
Harpia	15	10, 600	2015-02-16	700	Micgil
Harpia	15	10, 600	2015-02-16	800	Micgil
Harpia	15	2, 600	2015-02-16	715	Micmar
Harpia	15	3, 400	2015-02-13	800	Micmar
Harpia	15	5, 800	2015-02-17	715	Micmar
Harpia	15	6, 600	2015-02-16	715	Micmar
Harpia	15	8, 600	2015-02-16	630	Micmar
Harpia	15	8, 600	2015-02-16	645	Micmar
Harpia	15	8, 600	2015-02-16	715	Micmar
Harpia	15	9, 800	2015-02-17	645	Micmar
Harpia	15	9, 800	2015-02-17	545	Micruf
Harpia	15	1, -50	2015-02-07	545	Mitsal
Harpia	15	1, -50	2015-02-07	615	Mitsal
Harpia	15	1, -50	2015-02-07	630	Mitsal
Harpia	15	1, 800	2015-02-17	715	Mitsal
Harpia	15	2, 600	2015-02-16	745	Mitsal
Harpia	15	3, -50	2015-02-07	545	Mitsal
Harpia	15	3, -50	2015-02-07	630	Mitsal
Harpia	15	3, -50	2015-02-07	645	Mitsal
Harpia	15	3, 800	2015-02-17	700	Mitsal
Harpia	15	5, -50	2015-02-07	545	Mitsal
Harpia	15	5, -50	2015-02-07	600	Mitsal
Harpia	15	5, -50	2015-02-07	615	Mitsal
Harpia	15	5, -50	2015-02-07	630	Mitsal
Harpia	15	5, -50	2015-02-07	645	Mitsal
Harpia	15	5, -50	2015-02-07	730	Mitsal
Harpia	15	5, 800	2015-02-17	545	Mitsal
Harpia	15	6, 200	2015-02-12	630	Mitsal
Harpia	15	7, -50	2015-02-07	615	Mitsal
Harpia	15	7, -50	2015-02-07	630	Mitsal
Harpia	15	7, -50	2015-02-07	645	Mitsal
Harpia	15	7, -50	2015-02-07	715	Mitsal
Harpia	15	7, 400	2015-02-13	545	Mitsal
Harpia	15	7, 800	2015-02-17	545	Mitsal
Harpia	15	9, -50	2015-02-07	730	Mitsal
Harpia	15	1, 400	2015-02-13	745	Monmor
Harpia	15	1, 400	2015-02-13	800	Monmor
Harpia	15	2, 200	2015-02-17	715	Monmor
Harpia	15	2, 200	2015-02-17	745	Monmor
Harpia	15	5, 400	2015-02-13	800	Monmor
Harpia	15	7, -50	2015-02-07	600	Monmor
Harpia	15	8, 200	2015-02-10	730	Monmor
Harpia	15	8, 200	2015-02-10	745	Monmor
Harpia	15	9, -50	2015-02-07	600	Monmor
Harpia	15	9, -50	2015-02-07	615	Monmor
Harpia	15	9, -50	2015-02-07	630	Monmor
Harpia	15	2, 600	2015-02-16	700	Myigai
Harpia	15	2, 600	2015-02-16	730	Myigai
Harpia	15	3, -50	2015-02-07	800	Myilut
Harpia	15	1, -50	2015-02-07	800	Myitub
Harpia	15	1, 800	2015-02-17	715	Myitub
Harpia	15	3, 800	2015-02-17	745	Myitub
Harpia	15	4, 600	2015-02-16	600	Myitub
Harpia	15	4, 600	2015-02-16	615	Myitub
Harpia	15	7, -50	2015-02-07	615	Myitub
Harpia	15	7, -50	2015-02-07	630	Myitub
Harpia	15	7, -50	2015-02-07	645	Myitub
Harpia	15	7, -50	2015-02-07	700	Myitub
Harpia	15	7, 800	2015-02-17	800	Myitub
Harpia	15	8, 600	2015-02-16	715	Myitub
Harpia	15	9, 400	2015-02-13	745	Myitub
Harpia	15	9, 400	2015-02-13	800	Myitub
Harpia	15	9, 800	2015-02-17	715	Myitub
Harpia	15	10, 200	2015-02-12	615	Myitub
Harpia	15	10, 200	2015-02-12	630	Myitub
Harpia	15	10, 200	2015-02-12	645	Myitub
Harpia	15	10, 200	2015-02-12	700	Myitub
Harpia	15	10, 200	2015-02-12	715	Myitub
Harpia	15	10, 200	2015-02-12	730	Myitub
Harpia	15	10, 200	2015-02-12	745	Myitub
Harpia	15	10, 200	2015-02-12	800	Myitub
Harpia	15	1, 800	2015-02-17	615	Myraxi
Harpia	15	1, 800	2015-02-17	700	Myraxi
Harpia	15	2, 600	2015-02-16	615	Myraxi
Harpia	15	3, 400	2015-02-13	615	Myraxi
Harpia	15	3, 400	2015-02-13	630	Myraxi
Harpia	15	3, 400	2015-02-13	645	Myraxi
Harpia	15	3, 400	2015-02-13	700	Myraxi
Harpia	15	4, 200	2015-02-12	600	Myraxi
Harpia	15	4, 200	2015-02-12	615	Myraxi
Harpia	15	4, 600	2015-02-16	630	Myraxi
Harpia	15	4, 600	2015-02-16	730	Myraxi
Harpia	15	5, 400	2015-02-13	615	Myraxi
Harpia	15	9, -50	2015-02-07	645	Myraxi
Harpia	15	3, 800	2015-02-17	700	Myrbra
Harpia	15	1, -50	2015-02-07	615	Myrbra
Harpia	15	1, -50	2015-02-07	630	Myrbra
Harpia	15	1, -50	2015-02-07	645	Myrbra
Harpia	15	1, -50	2015-02-07	700	Myrbra
Harpia	15	1, -50	2015-02-07	715	Myrbra
Harpia	15	1, -50	2015-02-07	730	Myrbra
Harpia	15	1, -50	2015-02-07	745	Myrbra
Harpia	15	1, -50	2015-02-07	800	Myrbra
Harpia	15	1, 400	2015-02-13	715	Myrbra
Harpia	15	1, 400	2015-02-13	745	Myrbra
Harpia	15	1, 400	2015-02-13	800	Myrbra
Harpia	15	1, 800	2015-02-17	700	Myrbra
Harpia	15	2, 600	2015-02-16	745	Myrbra
Harpia	15	2, 600	2015-02-16	800	Myrbra
Harpia	15	4, 200	2015-02-12	630	Myrbra
Harpia	15	4, 200	2015-02-12	645	Myrbra
Harpia	15	4, 600	2015-02-16	615	Myrbra
Harpia	15	4, 600	2015-02-16	630	Myrbra
Harpia	15	4, 600	2015-02-16	645	Myrbra
Harpia	15	4, 600	2015-02-16	700	Myrbra
Harpia	15	4, 600	2015-02-16	715	Myrbra
Harpia	15	4, 600	2015-02-16	730	Myrbra
Harpia	15	4, 600	2015-02-16	745	Myrbra
Harpia	15	4, 600	2015-02-16	800	Myrbra
Harpia	15	5, -50	2015-02-07	615	Myrbra
Harpia	15	5, -50	2015-02-07	645	Myrbra
Harpia	15	5, 800	2015-02-17	645	Myrbra
Harpia	15	5, 800	2015-02-17	700	Myrbra
Harpia	15	6, 200	2015-02-12	630	Myrbra
Harpia	15	6, 200	2015-02-12	700	Myrbra
Harpia	15	6, 200	2015-02-12	715	Myrbra
Harpia	15	6, 200	2015-02-12	745	Myrbra
Harpia	15	6, 600	2015-02-16	700	Myrbra
Harpia	15	6, 600	2015-02-16	745	Myrbra
Harpia	15	7, -50	2015-02-07	600	Myrbra
Harpia	15	7, -50	2015-02-07	615	Myrbra
Harpia	15	7, -50	2015-02-07	630	Myrbra
Harpia	15	7, -50	2015-02-07	645	Myrbra
Harpia	15	7, -50	2015-02-07	700	Myrbra
Harpia	15	7, -50	2015-02-07	715	Myrbra
Harpia	15	7, -50	2015-02-07	730	Myrbra
Harpia	15	7, -50	2015-02-07	745	Myrbra
Harpia	15	7, 400	2015-02-13	645	Myrbra
Harpia	15	7, 400	2015-02-13	715	Myrbra
Harpia	15	7, 400	2015-02-13	745	Myrbra
Harpia	15	7, 800	2015-02-17	745	Myrbra
Harpia	15	7, 800	2015-02-17	800	Myrbra
Harpia	15	8, 200	2015-02-10	730	Myrbra
Harpia	15	8, 600	2015-02-16	615	Myrbra
Harpia	15	8, 600	2015-02-16	630	Myrbra
Harpia	15	8, 600	2015-02-16	645	Myrbra
Harpia	15	8, 600	2015-02-16	700	Myrbra
Harpia	15	8, 600	2015-02-16	715	Myrbra
Harpia	15	8, 600	2015-02-16	730	Myrbra
Harpia	15	8, 600	2015-02-16	745	Myrbra
Harpia	15	8, 600	2015-02-16	800	Myrbra
Harpia	15	9, 400	2015-02-13	700	Myrbra
Harpia	15	9, 400	2015-02-13	715	Myrbra
Harpia	15	9, 400	2015-02-13	730	Myrbra
Harpia	15	9, 400	2015-02-13	745	Myrbra
Harpia	15	9, 400	2015-02-13	800	Myrbra
Harpia	15	9, 800	2015-02-17	700	Myrbra
Harpia	15	9, 800	2015-02-17	715	Myrbra
Harpia	15	9, 800	2015-02-17	730	Myrbra
Harpia	15	10, 200	2015-02-12	630	Myrbra
Harpia	15	10, 200	2015-02-12	645	Myrbra
Harpia	15	10, 200	2015-02-12	700	Myrbra
Harpia	15	10, 200	2015-02-12	715	Myrbra
Harpia	15	10, 200	2015-02-12	730	Myrbra
Harpia	15	10, 600	2015-02-16	700	Myrbra
Harpia	15	1, 400	2015-02-13	545	Myrcam
Harpia	15	1, 400	2015-02-13	600	Myrcam
Harpia	15	1, 400	2015-02-13	615	Myrcam
Harpia	15	1, 400	2015-02-13	630	Myrcam
Harpia	15	1, 400	2015-02-13	645	Myrcam
Harpia	15	1, 400	2015-02-13	700	Myrcam
Harpia	15	1, 400	2015-02-13	715	Myrcam
Harpia	15	1, 400	2015-02-13	730	Myrcam
Harpia	15	1, 400	2015-02-13	745	Myrcam
Harpia	15	2, 200	2015-02-17	600	Myrcam
Harpia	15	2, 200	2015-02-17	730	Myrcam
Harpia	15	2, 200	2015-02-17	745	Myrcam
Harpia	15	2, 200	2015-02-17	800	Myrcam
Harpia	15	3, -50	2015-02-07	545	Myrcam
Harpia	15	3, -50	2015-02-07	600	Myrcam
Harpia	15	3, -50	2015-02-07	615	Myrcam
Harpia	15	3, -50	2015-02-07	630	Myrcam
Harpia	15	3, -50	2015-02-07	645	Myrcam
Harpia	15	3, -50	2015-02-07	700	Myrcam
Harpia	15	3, -50	2015-02-07	715	Myrcam
Harpia	15	3, -50	2015-02-07	730	Myrcam
Harpia	15	3, -50	2015-02-07	745	Myrcam
Harpia	15	3, -50	2015-02-07	800	Myrcam
Harpia	15	3, 400	2015-02-13	600	Myrcam
Harpia	15	3, 400	2015-02-13	615	Myrcam
Harpia	15	3, 400	2015-02-13	630	Myrcam
Harpia	15	3, 400	2015-02-13	645	Myrcam
Harpia	15	3, 400	2015-02-13	700	Myrcam
Harpia	15	3, 400	2015-02-13	715	Myrcam
Harpia	15	3, 400	2015-02-13	730	Myrcam
Harpia	15	3, 400	2015-02-13	745	Myrcam
Harpia	15	3, 400	2015-02-13	800	Myrcam
Harpia	15	4, 200	2015-02-12	600	Myrcam
Harpia	15	4, 200	2015-02-12	615	Myrcam
Harpia	15	4, 200	2015-02-12	630	Myrcam
Harpia	15	4, 200	2015-02-12	645	Myrcam
Harpia	15	4, 200	2015-02-12	700	Myrcam
Harpia	15	4, 200	2015-02-12	715	Myrcam
Harpia	15	4, 200	2015-02-12	730	Myrcam
Harpia	15	4, 200	2015-02-12	745	Myrcam
Harpia	15	4, 200	2015-02-12	800	Myrcam
Harpia	15	4, 600	2015-02-16	630	Myrcam
Harpia	15	5, -50	2015-02-07	600	Myrcam
Harpia	15	5, -50	2015-02-07	615	Myrcam
Harpia	15	5, -50	2015-02-07	630	Myrcam
Harpia	15	5, -50	2015-02-07	645	Myrcam
Harpia	15	5, -50	2015-02-07	700	Myrcam
Harpia	15	5, -50	2015-02-07	715	Myrcam
Harpia	15	5, -50	2015-02-07	730	Myrcam
Harpia	15	5, -50	2015-02-07	745	Myrcam
Harpia	15	5, -50	2015-02-07	800	Myrcam
Harpia	15	6, 200	2015-02-12	600	Myrcam
Harpia	15	6, 200	2015-02-12	615	Myrcam
Harpia	15	6, 200	2015-02-12	645	Myrcam
Harpia	15	6, 200	2015-02-12	715	Myrcam
Harpia	15	6, 200	2015-02-12	730	Myrcam
Harpia	15	6, 200	2015-02-12	745	Myrcam
Harpia	15	6, 200	2015-02-12	800	Myrcam
Harpia	15	6, 600	2015-02-16	645	Myrcam
Harpia	15	7, -50	2015-02-07	600	Myrcam
Harpia	15	7, -50	2015-02-07	630	Myrcam
Harpia	15	7, -50	2015-02-07	645	Myrcam
Harpia	15	7, -50	2015-02-07	700	Myrcam
Harpia	15	7, -50	2015-02-07	715	Myrcam
Harpia	15	7, -50	2015-02-07	730	Myrcam
Harpia	15	7, -50	2015-02-07	745	Myrcam
Harpia	15	7, -50	2015-02-07	800	Myrcam
Harpia	15	8, 200	2015-02-12	600	Myrcam
Harpia	15	8, 200	2015-02-12	615	Myrcam
Harpia	15	8, 200	2015-02-12	630	Myrcam
Harpia	15	8, 200	2015-02-10	700	Myrcam
Harpia	15	8, 200	2015-02-10	715	Myrcam
Harpia	15	8, 200	2015-02-10	745	Myrcam
Harpia	15	8, 600	2015-02-16	600	Myrcam
Harpia	15	8, 600	2015-02-16	615	Myrcam
Harpia	15	8, 600	2015-02-16	630	Myrcam
Harpia	15	8, 600	2015-02-16	645	Myrcam
Harpia	15	8, 600	2015-02-16	700	Myrcam
Harpia	15	8, 600	2015-02-16	715	Myrcam
Harpia	15	8, 600	2015-02-16	730	Myrcam
Harpia	15	8, 600	2015-02-16	745	Myrcam
Harpia	15	8, 600	2015-02-16	800	Myrcam
Harpia	15	9, 400	2015-02-13	700	Myrcam
Harpia	15	9, 800	2015-02-17	600	Myrcam
Harpia	15	9, 800	2015-02-17	615	Myrcam
Harpia	15	9, 800	2015-02-17	630	Myrcam
Harpia	15	9, 800	2015-02-17	645	Myrcam
Harpia	15	9, 800	2015-02-17	715	Myrcam
Harpia	15	10, 600	2015-02-16	600	Myrcam
Harpia	15	10, 600	2015-02-16	645	Myrcam
Harpia	15	10, 600	2015-02-16	700	Myrcam
Harpia	15	10, 600	2015-02-16	715	Myrcam
Harpia	15	10, 600	2015-02-16	730	Myrcam
Harpia	15	10, 600	2015-02-16	800	Myrcam
Harpia	15	4, 200	2015-02-12	715	Myrfje
Harpia	15	1, -50	2015-02-07	700	Myrfor
Harpia	15	1, 400	2015-02-13	745	Myrfor
Harpia	15	1, 400	2015-02-13	800	Myrfor
Harpia	15	1, 800	2015-02-17	600	Myrfor
Harpia	15	1, 800	2015-02-17	615	Myrfor
Harpia	15	1, 800	2015-02-17	630	Myrfor
Harpia	15	1, 800	2015-02-17	645	Myrfor
Harpia	15	2, 200	2015-02-17	800	Myrfor
Harpia	15	3, -50	2015-02-07	615	Myrfor
Harpia	15	3, -50	2015-02-07	630	Myrfor
Harpia	15	3, 800	2015-02-17	645	Myrfor
[truncated: 1,388 more rows]

## Sheet: H2016
Plot	Year	Point	Date	Time	Species
Harpia	16	1, -50	2016-01-26	545	Abucum
Harpia	16	1, -50	2016-01-26	545	Buccap
Harpia	16	1, -50	2016-01-26	545	Lopcri
Harpia	16	1, -50	2016-01-26	545	Mitsal
Harpia	16	1, -50	2016-01-26	545	Noturu
Harpia	16	1, -50	2016-01-26	545	Otuwat
Harpia	16	1, -50	2016-01-26	545	Phiert
Harpia	16	1, -50	2016-01-26	545	Turlaw
Harpia	16	1, -50	2016-01-26	545	Xipgut
Harpia	16	1, -50	2016-01-26	600	Barmar
Harpia	16	1, -50	2016-01-26	600	Cercin
Harpia	16	1, -50	2016-01-26	600	Chipar
Harpia	16	1, -50	2016-01-26	600	Cryvar
Harpia	16	1, -50	2016-01-26	600	Cymlin
Harpia	16	1, -50	2016-01-26	600	Dapame
Harpia	16	1, -50	2016-01-26	600	Geomon
Harpia	16	1, -50	2016-01-26	600	Glyspi
Harpia	16	1, -50	2016-01-26	600	Hylpoe
Harpia	16	1, -50	2016-01-26	600	Liotho
Harpia	16	1, -50	2016-01-26	600	Myrcam
Harpia	16	1, -50	2016-01-26	600	Myrmyo
Harpia	16	1, -50	2016-01-26	600	Piomel
Harpia	16	1, -50	2016-01-26	600	Thaard
Harpia	16	1, -50	2016-01-26	600	Turlaw
Harpia	16	1, -50	2016-01-26	600	Unk
Harpia	16	1, -50	2016-01-26	600	Xipgut
Harpia	16	1, -50	2016-01-26	615	Atispa
Harpia	16	1, -50	2016-01-26	615	Cercin
Harpia	16	1, -50	2016-01-26	615	Chipar
Harpia	16	1, -50	2016-01-26	615	Denruf
Harpia	16	1, -50	2016-01-26	615	Glyspi
Harpia	16	1, -50	2016-01-26	615	Hypcan
Harpia	16	1, -50	2016-01-26	615	Liotho
Harpia	16	1, -50	2016-01-26	615	Myraxi
Harpia	16	1, -50	2016-01-26	615	Myrcam
Harpia	16	1, -50	2016-01-26	615	Myrmyo
Harpia	16	1, -50	2016-01-26	615	Piomel
Harpia	16	1, -50	2016-01-26	615	Pitgro
Harpia	16	1, -50	2016-01-26	615	Rammel
Harpia	16	1, -50	2016-01-26	615	Ramvit
Harpia	16	1, -50	2016-01-26	615	Thrcor
Harpia	16	1, -50	2016-01-26	615	Tromel
Harpia	16	1, -50	2016-01-26	615	Xipgut
Harpia	16	1, -50	2016-01-26	630	Aramac
Harpia	16	1, -50	2016-01-26	630	Atispa
Harpia	16	1, -50	2016-01-26	630	Brocya
Harpia	16	1, -50	2016-01-26	630	Cercin
Harpia	16	1, -50	2016-01-26	630	Colplu
Harpia	16	1, -50	2016-01-26	630	Cryvar
Harpia	16	1, -50	2016-01-26	630	Cyacya
Harpia	16	1, -50	2016-01-26	630	Cymlin
Harpia	16	1, -50	2016-01-26	630	Denruf
Harpia	16	1, -50	2016-01-26	630	Glyspi
Harpia	16	1, -50	2016-01-26	630	Hylpoe
Harpia	16	1, -50	2016-01-26	630	Liotho
Harpia	16	1, -50	2016-01-26	630	Myraxi
Harpia	16	1, -50	2016-01-26	630	Myrbra
Harpia	16	1, -50	2016-01-26	630	Myrcam
Harpia	16	1, -50	2016-01-26	630	Myrfor
Harpia	16	1, -50	2016-01-26	630	Rammel
Harpia	16	1, -50	2016-01-26	630	Thamur
Harpia	16	1, -50	2016-01-26	630	Turlaw
Harpia	16	1, -50	2016-01-26	630	Unk
Harpia	16	1, -50	2016-01-26	630	Xipgut
Harpia	16	1, -50	2016-01-26	645	Brocya
Harpia	16	1, -50	2016-01-26	645	Camrub
Harpia	16	1, -50	2016-01-26	645	Cercin
Harpia	16	1, -50	2016-01-26	645	Colplu
Harpia	16	1, -50	2016-01-26	645	Cyacya
Harpia	16	1, -50	2016-01-26	645	Cymlin
Harpia	16	1, -50	2016-01-26	645	Myitub
Harpia	16	1, -50	2016-01-26	645	Myrbra
Harpia	16	1, -50	2016-01-26	645	Rammel
Harpia	16	1, -50	2016-01-26	645	Ramtuc
Harpia	16	1, -50	2016-01-26	645	Turlaw
Harpia	16	1, -50	2016-01-26	645	Xipgut
Harpia	16	1, -50	2016-01-26	700	Brocya
Harpia	16	1, -50	2016-01-26	700	Camrub
Harpia	16	1, -50	2016-01-26	700	Capnig
Harpia	16	1, -50	2016-01-26	700	Cercin
Harpia	16	1, -50	2016-01-26	700	Cyacya
Harpia	16	1, -50	2016-01-26	700	Cymlin
Harpia	16	1, -50	2016-01-26	700	Eupxan
Harpia	16	1, -50	2016-01-26	700	Glyspi
Harpia	16	1, -50	2016-01-26	700	Myrbra
Harpia	16	1, -50	2016-01-26	700	Myrcam
Harpia	16	1, -50	2016-01-26	700	Rammel
Harpia	16	1, -50	2016-01-26	700	Thasch
Harpia	16	1, -50	2016-01-26	700	Thrcor
Harpia	16	1, -50	2016-01-26	700	Tromel
Harpia	16	1, -50	2016-01-26	700	Turlaw
Harpia	16	1, -50	2016-01-26	700	Unk
Harpia	16	1, -50	2016-01-26	715	Brocya
Harpia	16	1, -50	2016-01-26	715	Cercin
Harpia	16	1, -50	2016-01-26	715	Chipar
Harpia	16	1, -50	2016-01-26	715	Colplu
Harpia	16	1, -50	2016-01-26	715	Cryvar
Harpia	16	1, -50	2016-01-26	715	Hyloch
Harpia	16	1, -50	2016-01-26	715	Myrcam
Harpia	16	1, -50	2016-01-26	715	Myrlon
Harpia	16	1, -50	2016-01-26	715	Piacay
Harpia	16	1, -50	2016-01-26	715	Rammel
Harpia	16	1, -50	2016-01-26	715	Troruf
Harpia	16	1, -50	2016-01-26	715	Turlaw
Harpia	16	1, -50	2016-01-26	715	Unk
Harpia	16	1, -50	2016-01-26	715	Unk
Harpia	16	1, -50	2016-01-26	715	Xipgut
Harpia	16	1, -50	2016-01-26	730	Autinf
Harpia	16	1, -50	2016-01-26	730	Camrub
Harpia	16	1, -50	2016-01-26	730	Cercin
Harpia	16	1, -50	2016-01-26	730	Chipar
Harpia	16	1, -50	2016-01-26	730	Colplu
Harpia	16	1, -50	2016-01-26	730	Colsub
Harpia	16	1, -50	2016-01-26	730	Geomon
Harpia	16	1, -50	2016-01-26	730	Myrlon
Harpia	16	1, -50	2016-01-26	730	Pitgro
Harpia	16	1, -50	2016-01-26	730	Psocre
Harpia	16	1, -50	2016-01-26	730	Rammel
Harpia	16	1, -50	2016-01-26	730	Thamur
Harpia	16	1, -50	2016-01-26	730	Troruf
Harpia	16	1, -50	2016-01-26	730	Trovir
Harpia	16	1, -50	2016-01-26	730	Unk
Harpia	16	1, -50	2016-01-26	730	Xipgut
Harpia	16	1, -50	2016-01-26	745	Atispa
Harpia	16	1, -50	2016-01-26	745	Autinf
Harpia	16	1, -50	2016-01-26	745	Caccel
Harpia	16	1, -50	2016-01-26	745	Capnig
Harpia	16	1, -50	2016-01-26	745	Celtor
Harpia	16	1, -50	2016-01-26	745	Cercin
Harpia	16	1, -50	2016-01-26	745	Chipar
Harpia	16	1, -50	2016-01-26	745	Colplu
Harpia	16	1, -50	2016-01-26	745	Geomon
Harpia	16	1, -50	2016-01-26	745	Myrbra
Harpia	16	1, -50	2016-01-26	745	Myrcam
Harpia	16	1, -50	2016-01-26	745	Piomel
Harpia	16	1, -50	2016-01-26	745	Pitgro
Harpia	16	1, -50	2016-01-26	745	Psavir
Harpia	16	1, -50	2016-01-26	745	Rammel
Harpia	16	1, -50	2016-01-26	745	Thacae
Harpia	16	1, -50	2016-01-26	745	Thamur
Harpia	16	1, -50	2016-01-26	745	Tinmaj
Harpia	16	1, -50	2016-01-26	745	Tromel
Harpia	16	1, -50	2016-01-26	745	Troruf
Harpia	16	1, -50	2016-01-26	745	Unk
Harpia	16	1, -50	2016-01-26	745	Xipgut
Harpia	16	1, -50	2016-01-26	800	Barmar
Harpia	16	1, -50	2016-01-26	800	Camrub
Harpia	16	1, -50	2016-01-26	800	Capnig
Harpia	16	1, -50	2016-01-26	800	Cercin
Harpia	16	1, -50	2016-01-26	800	Chipar
Harpia	16	1, -50	2016-01-26	800	Colplu
Harpia	16	1, -50	2016-01-26	800	Cymlin
Harpia	16	1, -50	2016-01-26	800	Denruf
Harpia	16	1, -50	2016-01-26	800	Geomon
Harpia	16	1, -50	2016-01-26	800	Hypcan
Harpia	16	1, -50	2016-01-26	800	Piacay
Harpia	16	1, -50	2016-01-26	800	Piomel
Harpia	16	1, -50	2016-01-26	800	Pitgro
Harpia	16	1, -50	2016-01-26	800	Rammel
Harpia	16	1, -50	2016-01-26	800	Thrcor
Harpia	16	1, -50	2016-01-26	800	Troruf
Harpia	16	1, -50	2016-01-26	800	Turlaw
Harpia	16	1, -50	2016-01-26	800	Xipgut
Harpia	16	3, -50	2016-01-26	545	Abucum
Harpia	16	3, -50	2016-01-26	545	Crysou
Harpia	16	3, -50	2016-01-26	545	Mitsal
Harpia	16	3, -50	2016-01-26	545	Myrcam
Harpia	16	3, -50	2016-01-26	545	Otuwat
Harpia	16	3, -50	2016-01-26	600	Atispa
Harpia	16	3, -50	2016-01-26	600	Camtur
Harpia	16	3, -50	2016-01-26	600	Dapame
Harpia	16	3, -50	2016-01-26	600	Geomon
Harpia	16	3, -50	2016-01-26	600	Hylsub
Harpia	16	3, -50	2016-01-26	600	Thaard
Harpia	16	3, -50	2016-01-26	600	Thamur
Harpia	16	3, -50	2016-01-26	600	Tingut
Harpia	16	3, -50	2016-01-26	600	Xipgut
Harpia	16	3, -50	2016-01-26	615	Amafar
Harpia	16	3, -50	2016-01-26	615	Camtur
Harpia	16	3, -50	2016-01-26	615	Cyacya
Harpia	16	3, -50	2016-01-26	615	Denruf
Harpia	16	3, -50	2016-01-26	615	Henleu
Harpia	16	3, -50	2016-01-26	615	Liotho
Harpia	16	3, -50	2016-01-26	615	Piomel
Harpia	16	3, -50	2016-01-26	615	Thrcor
Harpia	16	3, -50	2016-01-26	615	Tingut
Harpia	16	3, -50	2016-01-26	615	Trovir
Harpia	16	3, -50	2016-01-26	615	Xipgut
Harpia	16	3, -50	2016-01-26	630	Amafar
Harpia	16	3, -50	2016-01-26	630	Camtur
Harpia	16	3, -50	2016-01-26	630	Cercin
Harpia	16	3, -50	2016-01-26	630	Cyacya
Harpia	16	3, -50	2016-01-26	630	Liotho
Harpia	16	3, -50	2016-01-26	630	Piomel
Harpia	16	3, -50	2016-01-26	630	Thrcor
Harpia	16	3, -50	2016-01-26	630	Tingut
Harpia	16	3, -50	2016-01-26	630	Tinmaj
Harpia	16	3, -50	2016-01-26	630	Tolass
Harpia	16	3, -50	2016-01-26	630	Trovir
Harpia	16	3, -50	2016-01-26	630	Unk
Harpia	16	3, -50	2016-01-26	630	Xipgut
Harpia	16	3, -50	2016-01-26	645	Brocya
Harpia	16	3, -50	2016-01-26	645	Camrub
Harpia	16	3, -50	2016-01-26	645	Capnig
Harpia	16	3, -50	2016-01-26	645	Cercin
Harpia	16	3, -50	2016-01-26	645	Liotho
Harpia	16	3, -50	2016-01-26	645	Phamal
Harpia	16	3, -50	2016-01-26	645	Piomel
Harpia	16	3, -50	2016-01-26	645	Ramtuc
Harpia	16	3, -50	2016-01-26	645	Rhemel
Harpia	16	3, -50	2016-01-26	645	Thrcor
Harpia	16	3, -50	2016-01-26	645	Tingut
Harpia	16	3, -50	2016-01-26	645	Xipgut
Harpia	16	3, -50	2016-01-26	700	Anucas
Harpia	16	3, -50	2016-01-26	700	Brocya
Harpia	16	3, -50	2016-01-26	700	Camrub
Harpia	16	3, -50	2016-01-26	700	Camtur
Harpia	16	3, -50	2016-01-26	700	Capnig
Harpia	16	3, -50	2016-01-26	700	Cercin
Harpia	16	3, -50	2016-01-26	700	Cyacya
Harpia	16	3, -50	2016-01-26	700	Liotho
Harpia	16	3, -50	2016-01-26	700	Piomel
Harpia	16	3, -50	2016-01-26	700	Thrcor
Harpia	16	3, -50	2016-01-26	700	Tingut
Harpia	16	3, -50	2016-01-26	700	Trovir
Harpia	16	3, -50	2016-01-26	700	Xipgut
Harpia	16	3, -50	2016-01-26	715	Camrub
Harpia	16	3, -50	2016-01-26	715	Camtur
Harpia	16	3, -50	2016-01-26	715	Cercin
Harpia	16	3, -50	2016-01-26	715	Colplu
Harpia	16	3, -50	2016-01-26	715	Cyacya
Harpia	16	3, -50	2016-01-26	715	Geomon
Harpia	16	3, -50	2016-01-26	715	Liotho
Harpia	16	3, -50	2016-01-26	715	Micmar
Harpia	16	3, -50	2016-01-26	715	Rammel
Harpia	16	3, -50	2016-01-26	715	Thrcor
Harpia	16	3, -50	2016-01-26	715	Tingut
Harpia	16	3, -50	2016-01-26	730	Camrub
Harpia	16	3, -50	2016-01-26	730	Cercin
Harpia	16	3, -50	2016-01-26	730	Chipar
Harpia	16	3, -50	2016-01-26	730	Colplu
Harpia	16	3, -50	2016-01-26	730	Cyacya
Harpia	16	3, -50	2016-01-26	730	Henleu
Harpia	16	3, -50	2016-01-26	730	Hylhyp
Harpia	16	3, -50	2016-01-26	730	Liotho
Harpia	16	3, -50	2016-01-26	730	Micmar
Harpia	16	3, -50	2016-01-26	730	Pitgro
Harpia	16	3, -50	2016-01-26	730	Ramvit
Harpia	16	3, -50	2016-01-26	745	Brocya
Harpia	16	3, -50	2016-01-26	745	Camrub
Harpia	16	3, -50	2016-01-26	745	Capnig
Harpia	16	3, -50	2016-01-26	745	Chipar
Harpia	16	3, -50	2016-01-26	745	Colplu
Harpia	16	3, -50	2016-01-26	745	Cyacya
Harpia	16	3, -50	2016-01-26	745	Hylhyp
Harpia	16	3, -50	2016-01-26	745	Piomel
Harpia	16	3, -50	2016-01-26	745	Pitgro
Harpia	16	3, -50	2016-01-26	745	Thasch
Harpia	16	3, -50	2016-01-26	745	Thrcor
Harpia	16	3, -50	2016-01-26	745	Xipgut
Harpia	16	3, -50	2016-01-26	800	Anucas
Harpia	16	3, -50	2016-01-26	800	Camrub
Harpia	16	3, -50	2016-01-26	800	Chipar
Harpia	16	3, -50	2016-01-26	800	Colplu
Harpia	16	3, -50	2016-01-26	800	Colsub
Harpia	16	3, -50	2016-01-26	800	Cyacya
Harpia	16	3, -50	2016-01-26	800	Geomon
Harpia	16	3, -50	2016-01-26	800	Henleu
Harpia	16	3, -50	2016-01-26	800	Phamal
Harpia	16	3, -50	2016-01-26	800	Pitgro
Harpia	16	3, -50	2016-01-26	800	Thasch
Harpia	16	3, -50	2016-01-26	800	Thrcor
Harpia	16	3, -50	2016-01-26	800	Tingut
Harpia	16	5, -50	2016-01-26	545	Atispa
Harpia	16	5, -50	2016-01-26	545	Buccap
Harpia	16	5, -50	2016-01-26	545	Dencer
Harpia	16	5, -50	2016-01-26	545	Geomon
Harpia	16	5, -50	2016-01-26	545	Unk
Harpia	16	5, -50	2016-01-26	600	Cercin
Harpia	16	5, -50	2016-01-26	600	Dapame
Harpia	16	5, -50	2016-01-26	600	Dencer
Harpia	16	5, -50	2016-01-26	600	Geomon
Harpia	16	5, -50	2016-01-26	600	Glyspi
Harpia	16	5, -50	2016-01-26	600	Hylpoe
Harpia	16	5, -50	2016-01-26	600	Jacaur
Harpia	16	5, -50	2016-01-26	600	Thaard
Harpia	16	5, -50	2016-01-26	600	Thasch
Harpia	16	5, -50	2016-01-26	600	Thrcor
Harpia	16	5, -50	2016-01-26	600	Tinmaj
Harpia	16	5, -50	2016-01-26	600	Unk
Harpia	16	5, -50	2016-01-26	600	Xipgut
Harpia	16	5, -50	2016-01-26	615	Camtur
Harpia	16	5, -50	2016-01-26	615	Celgra
Harpia	16	5, -50	2016-01-26	615	Cercin
Harpia	16	5, -50	2016-01-26	615	Dencer
Harpia	16	5, -50	2016-01-26	615	Geomon
Harpia	16	5, -50	2016-01-26	615	Hypcan
Harpia	16	5, -50	2016-01-26	615	Myrfor
Harpia	16	5, -50	2016-01-26	615	Piomel
Harpia	16	5, -50	2016-01-26	615	Thasch
Harpia	16	5, -50	2016-01-26	615	Tinmaj
Harpia	16	5, -50	2016-01-26	615	Trovir
Harpia	16	5, -50	2016-01-26	615	Xipgut
Harpia	16	5, -50	2016-01-26	630	Amafar
Harpia	16	5, -50	2016-01-26	630	Autinf
Harpia	16	5, -50	2016-01-26	630	Camtur
Harpia	16	5, -50	2016-01-26	630	Cercin
Harpia	16	5, -50	2016-01-26	630	Colplu
Harpia	16	5, -50	2016-01-26	630	Hylpoe
Harpia	16	5, -50	2016-01-26	630	Lipvoc
Harpia	16	5, -50	2016-01-26	630	Myrhau
Harpia	16	5, -50	2016-01-26	630	Piomel
Harpia	16	5, -50	2016-01-26	630	Pteplu
Harpia	16	5, -50	2016-01-26	630	Rammel
Harpia	16	5, -50	2016-01-26	630	Rhemel
Harpia	16	5, -50	2016-01-26	630	Thasch
Harpia	16	5, -50	2016-01-26	630	Tinmaj
Harpia	16	5, -50	2016-01-26	630	Trovir
Harpia	16	5, -50	2016-01-26	630	Tyrsto
Harpia	16	5, -50	2016-01-26	630	Xipgut
Harpia	16	5, -50	2016-01-26	630	Xipgut
Harpia	16	5, -50	2016-01-26	645	Atispa
Harpia	16	5, -50	2016-01-26	645	Brocya
Harpia	16	5, -50	2016-01-26	645	Capnig
Harpia	16	5, -50	2016-01-26	645	Cercin
Harpia	16	5, -50	2016-01-26	645	Colplu
Harpia	16	5, -50	2016-01-26	645	Hylpoe
Harpia	16	5, -50	2016-01-26	645	Lanful
Harpia	16	5, -50	2016-01-26	645	Lipvoc
Harpia	16	5, -50	2016-01-26	645	Pygste
Harpia	16	5, -50	2016-01-26	645	Rammel
Harpia	16	5, -50	2016-01-26	645	Troruf
Harpia	16	5, -50	2016-01-26	645	Trovir
Harpia	16	5, -50	2016-01-26	645	Tyrsto
Harpia	16	5, -50	2016-01-26	645	Unk
Harpia	16	5, -50	2016-01-26	645	Xipgut
Harpia	16	5, -50	2016-01-26	700	Cammel
Harpia	16	5, -50	2016-01-26	700	Camrub
Harpia	16	5, -50	2016-01-26	700	Camtur
Harpia	16	5, -50	2016-01-26	700	Capnig
Harpia	16	5, -50	2016-01-26	700	Cercin
Harpia	16	5, -50	2016-01-26	700	Colplu
Harpia	16	5, -50	2016-01-26	700	Hylhyp
Harpia	16	5, -50	2016-01-26	700	Hylnae
Harpia	16	5, -50	2016-01-26	700	Hylpoe
Harpia	16	5, -50	2016-01-26	700	Liotho
Harpia	16	5, -50	2016-01-26	700	Lipvoc
Harpia	16	5, -50	2016-01-26	700	Piomen
Harpia	16	5, -50	2016-01-26	700	Troruf
Harpia	16	5, -50	2016-01-26	700	Trovir
Harpia	16	5, -50	2016-01-26	700	Tyrsto
Harpia	16	5, -50	2016-01-26	700	Unk
Harpia	16	5, -50	2016-01-26	715	Capnig
Harpia	16	5, -50	2016-01-26	715	Cercin
Harpia	16	5, -50	2016-01-26	715	Colplu
Harpia	16	5, -50	2016-01-26	715	Geomon
Harpia	16	5, -50	2016-01-26	715	Hylhyp
Harpia	16	5, -50	2016-01-26	715	Hylpoe
Harpia	16	5, -50	2016-01-26	715	Lanful
Harpia	16	5, -50	2016-01-26	715	Liotho
Harpia	16	5, -50	2016-01-26	715	Lipvoc
Harpia	16	5, -50	2016-01-26	715	Piomel
Harpia	16	5, -50	2016-01-26	715	Pteplu
Harpia	16	5, -50	2016-01-26	715	Thasch
Harpia	16	5, -50	2016-01-26	715	Troruf
Harpia	16	5, -50	2016-01-26	715	Unk
Harpia	16	5, -50	2016-01-26	730	Cammel
Harpia	16	5, -50	2016-01-26	730	Capnig
Harpia	16	5, -50	2016-01-26	730	Cercin
Harpia	16	5, -50	2016-01-26	730	Colplu
Harpia	16	5, -50	2016-01-26	730	Geomon
Harpia	16	5, -50	2016-01-26	730	Glyspi
Harpia	16	5, -50	2016-01-26	730	Liotho
Harpia	16	5, -50	2016-01-26	730	Piomen
Harpia	16	5, -50	2016-01-26	730	Pteplu
Harpia	16	5, -50	2016-01-26	730	Ramtuc
Harpia	16	5, -50	2016-01-26	730	Thasch
Harpia	16	5, -50	2016-01-26	730	Troruf
Harpia	16	5, -50	2016-01-26	730	Unk
Harpia	16	5, -50	2016-01-26	745	Brocya
Harpia	16	5, -50	2016-01-26	745	Cercin
Harpia	16	5, -50	2016-01-26	745	Colplu
Harpia	16	5, -50	2016-01-26	745	Geomon
Harpia	16	5, -50	2016-01-26	745	Hemzos
Harpia	16	5, -50	2016-01-26	745	Jacaur
Harpia	16	5, -50	2016-01-26	745	Macreg
Harpia	16	5, -50	2016-01-26	745	Micmar
Harpia	16	5, -50	2016-01-26	745	Piomel
Harpia	16	5, -50	2016-01-26	745	Pteplu
Harpia	16	5, -50	2016-01-26	745	Thamur
Harpia	16	5, -50	2016-01-26	745	Thamur
Harpia	16	5, -50	2016-01-26	745	Thasch
Harpia	16	5, -50	2016-01-26	745	Tromel
Harpia	16	5, -50	2016-01-26	745	Troruf
Harpia	16	5, -50	2016-01-26	800	Cercin
Harpia	16	5, -50	2016-01-26	800	Colplu
Harpia	16	5, -50	2016-01-26	800	Colsub
Harpia	16	5, -50	2016-01-26	800	Cyacya
Harpia	16	5, -50	2016-01-26	800	Geomon
Harpia	16	5, -50	2016-01-26	800	Hylpoe
Harpia	16	5, -50	2016-01-26	800	Jacaur
Harpia	16	5, -50	2016-01-26	800	Micmar
Harpia	16	5, -50	2016-01-26	800	Myrhau
Harpia	16	5, -50	2016-01-26	800	Myrmyo
Harpia	16	5, -50	2016-01-26	800	Pteplu
Harpia	16	5, -50	2016-01-26	800	Ramtuc
Harpia	16	5, -50	2016-01-26	800	Thasch
Harpia	16	5, -50	2016-01-26	800	Troruf
Harpia	16	5, -50	2016-01-26	800	Tyrsto
Harpia	16	5, -50	2016-01-26	800	Unk
Harpia	16	5, -50	2016-01-26	800	Xipgut
Harpia	16	7, -50	2016-01-26	545	Buccap
Harpia	16	7, -50	2016-01-26	545	Cichuh
Harpia	16	7, -50	2016-01-26	545	Cryvar
Harpia	16	7, -50	2016-01-26	545	Dencer
Harpia	16	7, -50	2016-01-26	545	Geomon
Harpia	16	7, -50	2016-01-26	545	Lopcri
Harpia	16	7, -50	2016-01-26	545	Mitsal
Harpia	16	7, -50	2016-01-26	545	Otuwat
Harpia	16	7, -50	2016-01-26	545	Unk
Harpia	16	7, -50	2016-01-26	545	Xipgut
Harpia	16	7, -50	2016-01-26	600	Buccap
Harpia	16	7, -50	2016-01-26	600	Celele
Harpia	16	7, -50	2016-01-26	600	Cercin
Harpia	16	7, -50	2016-01-26	600	Colplu
Harpia	16	7, -50	2016-01-26	600	Cymlin
Harpia	16	7, -50	2016-01-26	600	Dapame
Harpia	16	7, -50	2016-01-26	600	Dencer
Harpia	16	7, -50	2016-01-26	600	Freund
Harpia	16	7, -50	2016-01-26	600	Geomon
Harpia	16	7, -50	2016-01-26	600	Hyloch
Harpia	16	7, -50	2016-01-26	600	Jacaur
Harpia	16	7, -50	2016-01-26	600	Lipvoc
Harpia	16	7, -50	2016-01-26	600	Myraxi
Harpia	16	7, -50	2016-01-26	600	Pygste
Harpia	16	7, -50	2016-01-26	600	Thamur
Harpia	16	7, -50	2016-01-26	600	Tinmaj
Harpia	16	7, -50	2016-01-26	600	Unk
Harpia	16	7, -50	2016-01-26	600	Xipgut
Harpia	16	7, -50	2016-01-26	615	Amafar
Harpia	16	7, -50	2016-01-26	615	Cercin
Harpia	16	7, -50	2016-01-26	615	Colplu
Harpia	16	7, -50	2016-01-26	615	Conper
Harpia	16	7, -50	2016-01-26	615	Cyacya
Harpia	16	7, -50	2016-01-26	615	Cymlin
Harpia	16	7, -50	2016-01-26	615	Dapame
Harpia	16	7, -50	2016-01-26	615	Freund
Harpia	16	7, -50	2016-01-26	615	Hypcan
Harpia	16	7, -50	2016-01-26	615	Lipvoc
Harpia	16	7, -50	2016-01-26	615	Mitsal
Harpia	16	7, -50	2016-01-26	615	Myrbra
Harpia	16	7, -50	2016-01-26	615	Piomel
Harpia	16	7, -50	2016-01-26	615	Pygste
Harpia	16	7, -50	2016-01-26	615	Ramtuc
Harpia	16	7, -50	2016-01-26	615	Ramvit
Harpia	16	7, -50	2016-01-26	615	Thamur
Harpia	16	7, -50	2016-01-26	615	Tinmaj
Harpia	16	7, -50	2016-01-26	615	Tyrsto
Harpia	16	7, -50	2016-01-26	615	Unk
Harpia	16	7, -50	2016-01-26	615	Xipgut
Harpia	16	7, -50	2016-01-26	630	Amafar
Harpia	16	7, -50	2016-01-26	630	Cercin
Harpia	16	7, -50	2016-01-26	630	Colplu
Harpia	16	7, -50	2016-01-26	630	Conper
Harpia	16	7, -50	2016-01-26	630	Freund
Harpia	16	7, -50	2016-01-26	630	Geomon
Harpia	16	7, -50	2016-01-26	630	Hypcan
Harpia	16	7, -50	2016-01-26	630	Hyphyp
Harpia	16	7, -50	2016-01-26	630	Liotho
Harpia	16	7, -50	2016-01-26	630	Lipvoc
Harpia	16	7, -50	2016-01-26	630	Megmar
Harpia	16	7, -50	2016-01-26	630	Mitsal
Harpia	16	7, -50	2016-01-26	630	Myrbra
Harpia	16	7, -50	2016-01-26	630	Piomen
Harpia	16	7, -50	2016-01-26	630	Ramtuc
Harpia	16	7, -50	2016-01-26	630	Tromel
Harpia	16	7, -50	2016-01-26	630	Xipgut
Harpia	16	7, -50	2016-01-26	645	Brocya
Harpia	16	7, -50	2016-01-26	645	Cercin
Harpia	16	7, -50	2016-01-26	645	Colplu
Harpia	16	7, -50	2016-01-26	645	Conper
Harpia	16	7, -50	2016-01-26	645	Cymlin
Harpia	16	7, -50	2016-01-26	645	Hyloch
Harpia	16	7, -50	2016-01-26	645	Hyphyp
Harpia	16	7, -50	2016-01-26	645	Lipvoc
Harpia	16	7, -50	2016-01-26	645	Megmar
Harpia	16	7, -50	2016-01-26	645	Myrbra
Harpia	16	7, -50	2016-01-26	645	Myrcam
Harpia	16	7, -50	2016-01-26	645	Piomen
Harpia	16	7, -50	2016-01-26	645	Pygste
Harpia	16	7, -50	2016-01-26	645	Ramtuc
Harpia	16	7, -50	2016-01-26	645	Trovir
Harpia	16	7, -50	2016-01-26	645	Tyrsto
Harpia	16	7, -50	2016-01-26	645	Unk
Harpia	16	7, -50	2016-01-26	700	Cammel
Harpia	16	7, -50	2016-01-26	700	Cercin
Harpia	16	7, -50	2016-01-26	700	Colplu
Harpia	16	7, -50	2016-01-26	700	Conper
Harpia	16	7, -50	2016-01-26	700	Glyspi
Harpia	16	7, -50	2016-01-26	700	Hypcan
Harpia	16	7, -50	2016-01-26	700	Lipvoc
Harpia	16	7, -50	2016-01-26	700	Macreg
Harpia	16	7, -50	2016-01-26	700	Myrbra
Harpia	16	7, -50	2016-01-26	700	Myrcam
Harpia	16	7, -50	2016-01-26	700	Myrmyo
Harpia	16	7, -50	2016-01-26	700	Psavir
Harpia	16	7, -50	2016-01-26	700	Pygste
Harpia	16	7, -50	2016-01-26	700	Rhysim
Harpia	16	7, -50	2016-01-26	700	Tolass
Harpia	16	7, -50	2016-01-26	700	Troruf
Harpia	16	7, -50	2016-01-26	700	Tyrsto
Harpia	16	7, -50	2016-01-26	715	Amafar
Harpia	16	7, -50	2016-01-26	715	Capnig
Harpia	16	7, -50	2016-01-26	715	Cercin
Harpia	16	7, -50	2016-01-26	715	Conper
Harpia	16	7, -50	2016-01-26	715	Cymlin
Harpia	16	7, -50	2016-01-26	715	Freund
Harpia	16	7, -50	2016-01-26	715	Glyspi
Harpia	16	7, -50	2016-01-26	715	Hypcan
Harpia	16	7, -50	2016-01-26	715	Lipvoc
Harpia	16	7, -50	2016-01-26	715	Myrbra
Harpia	16	7, -50	2016-01-26	715	Pygste
Harpia	16	7, -50	2016-01-26	715	Ramtuc
Harpia	16	7, -50	2016-01-26	715	Thamur
Harpia	16	7, -50	2016-01-26	715	Troruf
Harpia	16	7, -50	2016-01-26	715	Tyrsto
Harpia	16	7, -50	2016-01-26	730	Aramac
Harpia	16	7, -50	2016-01-26	730	Cercin
Harpia	16	7, -50	2016-01-26	730	Colplu
Harpia	16	7, -50	2016-01-26	730	Cortor
Harpia	16	7, -50	2016-01-26	730	Jacaur
Harpia	16	7, -50	2016-01-26	730	Lipvoc
Harpia	16	7, -50	2016-01-26	730	Myrbra
Harpia	16	7, -50	2016-01-26	730	Myrcam
Harpia	16	7, -50	2016-01-26	730	Myrcam
Harpia	16	7, -50	2016-01-26	730	Myrmyo
Harpia	16	7, -50	2016-01-26	730	Phiert
Harpia	16	7, -50	2016-01-26	730	Piomel
Harpia	16	7, -50	2016-01-26	730	Pippip
Harpia	16	7, -50	2016-01-26	730	Ramtuc
Harpia	16	7, -50	2016-01-26	730	Tolass
Harpia	16	7, -50	2016-01-26	730	Troruf
Harpia	16	7, -50	2016-01-26	730	Venaff
Harpia	16	7, -50	2016-01-26	745	Brocya
Harpia	16	7, -50	2016-01-26	745	Cercin
Harpia	16	7, -50	2016-01-26	745	Colplu
Harpia	16	7, -50	2016-01-26	745	Hypcan
Harpia	16	7, -50	2016-01-26	745	Jacaur
Harpia	16	7, -50	2016-01-26	745	Lipvoc
Harpia	16	7, -50	2016-01-26	745	Myrbra
Harpia	16	7, -50	2016-01-26	745	Myrcam
Harpia	16	7, -50	2016-01-26	745	Myrmyo
Harpia	16	7, -50	2016-01-26	745	Piomel
Harpia	16	7, -50	2016-01-26	745	Pippip
Harpia	16	7, -50	2016-01-26	745	Ramtuc
Harpia	16	7, -50	2016-01-26	745	Thamur
Harpia	16	7, -50	2016-01-26	745	Troruf
Harpia	16	7, -50	2016-01-26	745	Tyrsto
Harpia	16	7, -50	2016-01-26	745	Unk
Harpia	16	7, -50	2016-01-26	800	Cercin
Harpia	16	7, -50	2016-01-26	800	Colplu
Harpia	16	7, -50	2016-01-26	800	Hylpoe
Harpia	16	7, -50	2016-01-26	800	Myrmyo
Harpia	16	7, -50	2016-01-26	800	Piacay
Harpia	16	7, -50	2016-01-26	800	Ramtuc
Harpia	16	7, -50	2016-01-26	800	Ramvit
Harpia	16	7, -50	2016-01-26	800	Rhysim
Harpia	16	7, -50	2016-01-26	800	Tyrsto
Harpia	16	7, -50	2016-01-26	800	Unk
Harpia	16	7, -50	2016-01-26	800	Xipobs
Harpia	16	9, -50	2016-01-26	545	Cryvar
Harpia	16	9, -50	2016-01-26	545	Dencer
Harpia	16	9, -50	2016-01-26	545	Denruf
Harpia	16	9, -50	2016-01-26	545	Lopcri
Harpia	16	9, -50	2016-01-26	545	Otuwat
Harpia	16	9, -50	2016-01-26	545	Xipgut
Harpia	16	9, -50	2016-01-26	600	Buccap
Harpia	16	9, -50	2016-01-26	600	Dapame
Harpia	16	9, -50	2016-01-26	600	Denruf
Harpia	16	9, -50	2016-01-26	600	Hylpoe
Harpia	16	9, -50	2016-01-26	600	Hypcan
Harpia	16	9, -50	2016-01-26	600	Lipvoc
Harpia	16	9, -50	2016-01-26	600	Monmor
Harpia	16	9, -50	2016-01-26	600	Myrcam
Harpia	16	9, -50	2016-01-26	600	Pygste
Harpia	16	9, -50	2016-01-26	600	Pygste
Harpia	16	9, -50	2016-01-26	600	Trovir
Harpia	16	9, -50	2016-01-26	600	Tyrsto
Harpia	16	9, -50	2016-01-26	600	Unk
Harpia	16	9, -50	2016-01-26	600	Xipgut
Harpia	16	9, -50	2016-01-26	615	Cercin
Harpia	16	9, -50	2016-01-26	615	Cymlin
Harpia	16	9, -50	2016-01-26	615	Dapame
Harpia	16	9, -50	2016-01-26	615	Hypcan
Harpia	16	9, -50	2016-01-26	615	Liotho
Harpia	16	9, -50	2016-01-26	615	Lipvoc
Harpia	16	9, -50	2016-01-26	615	Myrcam
Harpia	16	9, -50	2016-01-26	615	Myrmyo
Harpia	16	9, -50	2016-01-26	615	Piomel
Harpia	16	9, -50	2016-01-26	615	Pygste
Harpia	16	9, -50	2016-01-26	615	Ramtuc
Harpia	16	9, -50	2016-01-26	615	Thacae
Harpia	16	9, -50	2016-01-26	615	Thamur
Harpia	16	9, -50	2016-01-26	615	Trovir
Harpia	16	9, -50	2016-01-26	615	Tyrsto
Harpia	16	9, -50	2016-01-26	615	Xipgut
Harpia	16	9, -50	2016-01-26	630	Cammel
Harpia	16	9, -50	2016-01-26	630	Cymlin
Harpia	16	9, -50	2016-01-26	630	Hyphyp
Harpia	16	9, -50	2016-01-26	630	Liotho
Harpia	16	9, -50	2016-01-26	630	Lipvoc
Harpia	16	9, -50	2016-01-26	630	Piomen
Harpia	16	9, -50	2016-01-26	630	Thamur
Harpia	16	9, -50	2016-01-26	630	Trovir
Harpia	16	9, -50	2016-01-26	630	Unk
Harpia	16	9, -50	2016-01-26	630	Unk
Harpia	16	9, -50	2016-01-26	630	Xipgut
Harpia	16	9, -50	2016-01-26	645	Amafar
Harpia	16	9, -50	2016-01-26	645	Brocya
Harpia	16	9, -50	2016-01-26	645	Cercin
Harpia	16	9, -50	2016-01-26	645	Cymlin
Harpia	16	9, -50	2016-01-26	645	Hylsub
Harpia	16	9, -50	2016-01-26	645	Hyphyp
Harpia	16	9, -50	2016-01-26	645	Jacaur
Harpia	16	9, -50	2016-01-26	645	Liotho
Harpia	16	9, -50	2016-01-26	645	Lipvoc
Harpia	16	9, -50	2016-01-26	645	Pipchl
Harpia	16	9, -50	2016-01-26	645	Quepur
Harpia	16	9, -50	2016-01-26	645	Tyrsto
Harpia	16	9, -50	2016-01-26	700	Celele
Harpia	16	9, -50	2016-01-26	700	Cercin
Harpia	16	9, -50	2016-01-26	700	Cymlin
Harpia	16	9, -50	2016-01-26	700	Glyspi
Harpia	16	9, -50	2016-01-26	700	Hypcan
Harpia	16	9, -50	2016-01-26	700	Jacaur
Harpia	16	9, -50	2016-01-26	700	Liotho
Harpia	16	9, -50	2016-01-26	700	Lipvoc
Harpia	16	9, -50	2016-01-26	700	Pipchl
Harpia	16	9, -50	2016-01-26	700	Pygste
Harpia	16	9, -50	2016-01-26	700	Quepur
Harpia	16	9, -50	2016-01-26	700	Thamur
Harpia	16	9, -50	2016-01-26	700	Tyrsto
Harpia	16	9, -50	2016-01-26	700	Unk
Harpia	16	9, -50	2016-01-26	715	Amafar
Harpia	16	9, -50	2016-01-26	715	Brocya
Harpia	16	9, -50	2016-01-26	715	Cymlin
Harpia	16	9, -50	2016-01-26	715	Liotho
Harpia	16	9, -50	2016-01-26	715	Lipvoc
Harpia	16	9, -50	2016-01-26	715	Psavir
Harpia	16	9, -50	2016-01-26	715	Pygste
Harpia	16	9, -50	2016-01-26	715	Quepur
Harpia	16	9, -50	2016-01-26	715	Thamur
Harpia	16	9, -50	2016-01-26	730	Cymlin
Harpia	16	9, -50	2016-01-26	730	Liotho
Harpia	16	9, -50	2016-01-26	730	Lipvoc
Harpia	16	9, -50	2016-01-26	730	Phiert
Harpia	16	9, -50	2016-01-26	730	Pipchl
Harpia	16	9, -50	2016-01-26	730	Pipery
Harpia	16	9, -50	2016-01-26	730	Psavir
Harpia	16	9, -50	2016-01-26	730	Pygste
Harpia	16	9, -50	2016-01-26	730	Unk
Harpia	16	9, -50	2016-01-26	745	Brocya
Harpia	16	9, -50	2016-01-26	745	Cortor
Harpia	16	9, -50	2016-01-26	745	Cymlin
Harpia	16	9, -50	2016-01-26	745	Eupxan
Harpia	16	9, -50	2016-01-26	745	Hylnae
Harpia	16	9, -50	2016-01-26	745	Liotho
Harpia	16	9, -50	2016-01-26	745	Lipvoc
Harpia	16	9, -50	2016-01-26	745	Monmor
Harpia	16	9, -50	2016-01-26	745	Myrbra
Harpia	16	9, -50	2016-01-26	745	Phiert
Harpia	16	9, -50	2016-01-26	745	Piomel
Harpia	16	9, -50	2016-01-26	745	Pipchl
Harpia	16	9, -50	2016-01-26	745	Pipery
Harpia	16	9, -50	2016-01-26	745	Pygste
Harpia	16	9, -50	2016-01-26	745	Rhysim
Harpia	16	9, -50	2016-01-26	745	Tolass
Harpia	16	9, -50	2016-01-26	745	Unk
Harpia	16	9, -50	2016-01-26	800	Cortor
Harpia	16	9, -50	2016-01-26	800	Hypcan
Harpia	16	9, -50	2016-01-26	800	Liotho
Harpia	16	9, -50	2016-01-26	800	Myrbra
Harpia	16	9, -50	2016-01-26	800	Phiert
Harpia	16	9, -50	2016-01-26	800	Pygste
Harpia	16	9, -50	2016-01-26	800	Ramtuc
Harpia	16	9, -50	2016-01-26	800	Ramvit
Harpia	16	9, -50	2016-01-26	800	Rhysim
Harpia	16	9, -50	2016-01-26	800	Tingut
Harpia	16	9, -50	2016-01-26	800	Unk
Harpia	16	2, 200	2016-01-28	545	Buccap
Harpia	16	2, 200	2016-01-28	545	Dencer
Harpia	16	2, 200	2016-01-28	545	Lopcri
Harpia	16	2, 200	2016-01-28	545	Mitsal
Harpia	16	2, 200	2016-01-28	545	Nonbru
Harpia	16	2, 200	2016-01-28	545	Otuwat
Harpia	16	2, 200	2016-01-28	545	Thamur
Harpia	16	2, 200	2016-01-28	545	Xipgut
Harpia	16	2, 200	2016-01-28	600	Buccap
Harpia	16	2, 200	2016-01-28	600	Buccap
Harpia	16	2, 200	2016-01-28	600	Cammel
Harpia	16	2, 200	2016-01-28	600	Cercin
Harpia	16	2, 200	2016-01-28	600	Crysou
Harpia	16	2, 200	2016-01-28	600	Geomon
Harpia	16	2, 200	2016-01-28	600	Hylpoe
Harpia	16	2, 200	2016-01-28	600	Macreg
Harpia	16	2, 200	2016-01-28	600	Myrcam
Harpia	16	2, 200	2016-01-28	600	Myrmyo
Harpia	16	2, 200	2016-01-28	600	Nonbru
Harpia	16	2, 200	2016-01-28	600	Thamur
Harpia	16	2, 200	2016-01-28	600	Thasch
Harpia	16	2, 200	2016-01-28	600	Xipgut
Harpia	16	2, 200	2016-01-28	615	Autinf
Harpia	16	2, 200	2016-01-28	615	Cercin
Harpia	16	2, 200	2016-01-28	615	Glyspi
Harpia	16	2, 200	2016-01-28	615	Hylpoe
Harpia	16	2, 200	2016-01-28	615	Hypcan
Harpia	16	2, 200	2016-01-28	615	Liotho
Harpia	16	2, 200	2016-01-28	615	Macreg
Harpia	16	2, 200	2016-01-28	615	Myrmyo
Harpia	16	2, 200	2016-01-28	615	Piomen
Harpia	16	2, 200	2016-01-28	615	Ramtuc
Harpia	16	2, 200	2016-01-28	615	Thasch
Harpia	16	2, 200	2016-01-28	615	Tinmaj
Harpia	16	2, 200	2016-01-28	615	Xipgut
Harpia	16	2, 200	2016-01-28	630	Amafar
Harpia	16	2, 200	2016-01-28	630	Atispa
Harpia	16	2, 200	2016-01-28	630	Barmar
Harpia	16	2, 200	2016-01-28	630	Brocya
Harpia	16	2, 200	2016-01-28	630	Cammel
Harpia	16	2, 200	2016-01-28	630	Cercin
Harpia	16	2, 200	2016-01-28	630	Colplu
Harpia	16	2, 200	2016-01-28	630	Cryvar
Harpia	16	2, 200	2016-01-28	630	Cymlin
Harpia	16	2, 200	2016-01-28	630	Dencer
Harpia	16	2, 200	2016-01-28	630	Geomon
Harpia	16	2, 200	2016-01-28	630	Gymleu
Harpia	16	2, 200	2016-01-28	630	Hylpoe
Harpia	16	2, 200	2016-01-28	630	Liotho
Harpia	16	2, 200	2016-01-28	630	Macreg
Harpia	16	2, 200	2016-01-28	630	Myrmyo
Harpia	16	2, 200	2016-01-28	630	Piomel
Harpia	16	2, 200	2016-01-28	630	Psavir
Harpia	16	2, 200	2016-01-28	630	Thamur
Harpia	16	2, 200	2016-01-28	630	Tinmaj
Harpia	16	2, 200	2016-01-28	645	Amafar
Harpia	16	2, 200	2016-01-28	645	Brocya
Harpia	16	2, 200	2016-01-28	645	Cammel
Harpia	16	2, 200	2016-01-28	645	Capnig
Harpia	16	2, 200	2016-01-28	645	Cercin
Harpia	16	2, 200	2016-01-28	645	Colplu
Harpia	16	2, 200	2016-01-28	645	Geomon
Harpia	16	2, 200	2016-01-28	645	Macreg
Harpia	16	2, 200	2016-01-28	645	Myrmyo
Harpia	16	2, 200	2016-01-28	645	Naslon
Harpia	16	2, 200	2016-01-28	645	Piomel
Harpia	16	2, 200	2016-01-28	645	Pitgro
Harpia	16	2, 200	2016-01-28	645	Psavir
Harpia	16	2, 200	2016-01-28	645	Ramtuc
Harpia	16	2, 200	2016-01-28	645	Tanspp
Harpia	16	2, 200	2016-01-28	700	Atispa
Harpia	16	2, 200	2016-01-28	700	Camrub
Harpia	16	2, 200	2016-01-28	700	Cercin
Harpia	16	2, 200	2016-01-28	700	Colplu
Harpia	16	2, 200	2016-01-28	700	Dencer
Harpia	16	2, 200	2016-01-28	700	Geomon
Harpia	16	2, 200	2016-01-28	700	Jacaur
Harpia	16	2, 200	2016-01-28	700	Macreg
Harpia	16	2, 200	2016-01-28	700	Pitgro
Harpia	16	2, 200	2016-01-28	700	Ramtuc
Harpia	16	2, 200	2016-01-28	700	Ramvit
Harpia	16	2, 200	2016-01-28	700	Unk
Harpia	16	2, 200	2016-01-28	715	Amafar
Harpia	16	2, 200	2016-01-28	715	Atispa
Harpia	16	2, 200	2016-01-28	715	Brocya
Harpia	16	2, 200	2016-01-28	715	Camrub
Harpia	16	2, 200	2016-01-28	715	Capnig
Harpia	16	2, 200	2016-01-28	715	Cercin
Harpia	16	2, 200	2016-01-28	715	Colplu
Harpia	16	2, 200	2016-01-28	715	Geomon
Harpia	16	2, 200	2016-01-28	715	Macreg
Harpia	16	2, 200	2016-01-28	715	Pitgro
Harpia	16	2, 200	2016-01-28	715	Ramtuc
Harpia	16	2, 200	2016-01-28	715	Ramvit
Harpia	16	2, 200	2016-01-28	730	Atispa
Harpia	16	2, 200	2016-01-28	730	Cammel
Harpia	16	2, 200	2016-01-28	730	Camrub
Harpia	16	2, 200	2016-01-28	730	Capnig
Harpia	16	2, 200	2016-01-28	730	Cercin
Harpia	16	2, 200	2016-01-28	730	Colplu
Harpia	16	2, 200	2016-01-28	730	Colsub
Harpia	16	2, 200	2016-01-28	730	Cyacya
Harpia	16	2, 200	2016-01-28	730	Geomon
Harpia	16	2, 200	2016-01-28	730	Macreg
Harpia	16	2, 200	2016-01-28	730	Myrmyo
Harpia	16	2, 200	2016-01-28	730	Pitalb
Harpia	16	2, 200	2016-01-28	730	Ramtuc
Harpia	16	2, 200	2016-01-28	730	Rhemel
Harpia	16	2, 200	2016-01-28	730	Thrcor
Harpia	16	2, 200	2016-01-28	730	Turlaw
Harpia	16	2, 200	2016-01-28	745	Atispa
Harpia	16	2, 200	2016-01-28	745	Brocya
Harpia	16	2, 200	2016-01-28	745	Cammel
Harpia	16	2, 200	2016-01-28	745	Camrub
Harpia	16	2, 200	2016-01-28	745	Capnig
Harpia	16	2, 200	2016-01-28	745	Cercin
Harpia	16	2, 200	2016-01-28	745	Colplu
Harpia	16	2, 200	2016-01-28	745	Cyacya
Harpia	16	2, 200	2016-01-28	745	Geomon
Harpia	16	2, 200	2016-01-28	745	Macreg
Harpia	16	2, 200	2016-01-28	745	Monmor
Harpia	16	2, 200	2016-01-28	745	Ramtuc
Harpia	16	2, 200	2016-01-28	745	Ramvit
Harpia	16	2, 200	2016-01-28	745	Thamur
Harpia	16	2, 200	2016-01-28	745	Turlaw
Harpia	16	2, 200	2016-01-28	745	Unk
Harpia	16	2, 200	2016-01-28	800	Amafar
Harpia	16	2, 200	2016-01-28	800	Atispa
Harpia	16	2, 200	2016-01-28	800	Cammel
Harpia	16	2, 200	2016-01-28	800	Capnig
Harpia	16	2, 200	2016-01-28	800	Colplu
Harpia	16	2, 200	2016-01-28	800	Cyacya
Harpia	16	2, 200	2016-01-28	800	Geomon
Harpia	16	2, 200	2016-01-28	800	Macreg
Harpia	16	2, 200	2016-01-28	800	Monmor
Harpia	16	2, 200	2016-01-28	800	Myrmyo
Harpia	16	2, 200	2016-01-28	800	Pygste
Harpia	16	2, 200	2016-01-28	800	Ramtuc
Harpia	16	2, 200	2016-01-28	800	Thamur
Harpia	16	2, 200	2016-01-28	800	Thrcor
Harpia	16	2, 200	2016-01-28	800	Tromel
Harpia	16	2, 200	2016-01-28	800	Turlaw
Harpia	16	2, 200	2016-01-28	800	Xipgut
Harpia	16	4, 200	2016-01-28	545	Abucum
Harpia	16	4, 200	2016-01-28	545	Barmar
Harpia	16	4, 200	2016-01-28	545	Buccap
Harpia	16	4, 200	2016-01-28	545	Dencer
Harpia	16	4, 200	2016-01-28	545	Lopcri
Harpia	16	4, 200	2016-01-28	545	Mitsal
Harpia	16	4, 200	2016-01-28	545	Otuwat
Harpia	16	4, 200	2016-01-28	545	Xipgut
Harpia	16	4, 200	2016-01-28	600	Atispa
Harpia	16	4, 200	2016-01-28	600	Autinf
Harpia	16	4, 200	2016-01-28	600	Dencer
Harpia	16	4, 200	2016-01-28	600	Hypcan
Harpia	16	4, 200	2016-01-28	600	Lipvoc
Harpia	16	4, 200	2016-01-28	600	Myrcam
Harpia	16	4, 200	2016-01-28	600	Ramtuc
Harpia	16	4, 200	2016-01-28	600	Thasch
Harpia	16	4, 200	2016-01-28	600	Tinmaj
Harpia	16	4, 200	2016-01-28	600	Tyrsto
Harpia	16	4, 200	2016-01-28	600	Xipgut
Harpia	16	4, 200	2016-01-28	615	Atispa
Harpia	16	4, 200	2016-01-28	615	Barmar
Harpia	16	4, 200	2016-01-28	615	Cammel
Harpia	16	4, 200	2016-01-28	615	Colplu
Harpia	16	4, 200	2016-01-28	615	Cryvar
Harpia	16	4, 200	2016-01-28	615	Hypcan
Harpia	16	4, 200	2016-01-28	615	Liotho
Harpia	16	4, 200	2016-01-28	615	Lipvoc
Harpia	16	4, 200	2016-01-28	615	Malfus
Harpia	16	4, 200	2016-01-28	615	Myrbra
Harpia	16	4, 200	2016-01-28	615	Piomel
Harpia	16	4, 200	2016-01-28	615	Ramtuc
Harpia	16	4, 200	2016-01-28	615	Ramvit
Harpia	16	4, 200	2016-01-28	615	Tinmaj
Harpia	16	4, 200	2016-01-28	615	Trovir
Harpia	16	4, 200	2016-01-28	615	Tyrsto
Harpia	16	4, 200	2016-01-28	615	Xipgut
Harpia	16	4, 200	2016-01-28	630	Amafar
Harpia	16	4, 200	2016-01-28	630	Atispa
Harpia	16	4, 200	2016-01-28	630	Cammel
Harpia	16	4, 200	2016-01-28	630	Camrub
Harpia	16	4, 200	2016-01-28	630	Celgra
Harpia	16	4, 200	2016-01-28	630	Colplu
Harpia	16	4, 200	2016-01-28	630	Cryvar
Harpia	16	4, 200	2016-01-28	630	Geomon
Harpia	16	4, 200	2016-01-28	630	Lipvoc
Harpia	16	4, 200	2016-01-28	630	Malfus
Harpia	16	4, 200	2016-01-28	630	Myrmyo
Harpia	16	4, 200	2016-01-28	630	Piomel
Harpia	16	4, 200	2016-01-28	630	Ramtuc
Harpia	16	4, 200	2016-01-28	630	Tinmaj
Harpia	16	4, 200	2016-01-28	630	Trovir
Harpia	16	4, 200	2016-01-28	630	Tyrsto
Harpia	16	4, 200	2016-01-28	630	Xipgut
Harpia	16	4, 200	2016-01-28	645	Amafar
Harpia	16	4, 200	2016-01-28	645	Atispa
Harpia	16	4, 200	2016-01-28	645	Brocya
Harpia	16	4, 200	2016-01-28	645	Cammel
Harpia	16	4, 200	2016-01-28	645	Camrub
Harpia	16	4, 200	2016-01-28	645	Celgra
Harpia	16	4, 200	2016-01-28	645	Colplu
Harpia	16	4, 200	2016-01-28	645	Dencer
Harpia	16	4, 200	2016-01-28	645	Eupruf
Harpia	16	4, 200	2016-01-28	645	Geomon
Harpia	16	4, 200	2016-01-28	645	Hypcan
Harpia	16	4, 200	2016-01-28	645	Lipvoc
Harpia	16	4, 200	2016-01-28	645	Myrbra
Harpia	16	4, 200	2016-01-28	645	Piomel
Harpia	16	4, 200	2016-01-28	645	Pitgro
Harpia	16	4, 200	2016-01-28	645	Psavir
Harpia	16	4, 200	2016-01-28	645	Ramtuc
Harpia	16	4, 200	2016-01-28	645	Trovir
Harpia	16	4, 200	2016-01-28	645	Tyrsto
Harpia	16	4, 200	2016-01-28	645	Xipgut
Harpia	16	4, 200	2016-01-28	700	Atispa
Harpia	16	4, 200	2016-01-28	700	Camrub
Harpia	16	4, 200	2016-01-28	700	Cercin
Harpia	16	4, 200	2016-01-28	700	Hylnae
Harpia	16	4, 200	2016-01-28	700	Hypcan
Harpia	16	4, 200	2016-01-28	700	Myrbra
Harpia	16	4, 200	2016-01-28	700	Ramtuc
Harpia	16	4, 200	2016-01-28	700	Ramvit
Harpia	16	4, 200	2016-01-28	700	Tyrsto
Harpia	16	4, 200	2016-01-28	700	Unk
Harpia	16	4, 200	2016-01-28	700	Unk
Harpia	16	4, 200	2016-01-28	715	Brocya
Harpia	16	4, 200	2016-01-28	715	Camrub
Harpia	16	4, 200	2016-01-28	715	Celgra
Harpia	16	4, 200	2016-01-28	715	Cercin
Harpia	16	4, 200	2016-01-28	715	Dapame
Harpia	16	4, 200	2016-01-28	715	Henleu
Harpia	16	4, 200	2016-01-28	715	Hylnae
Harpia	16	4, 200	2016-01-28	715	Hypcan
Harpia	16	4, 200	2016-01-28	715	Liotho
Harpia	16	4, 200	2016-01-28	715	Myrbra
Harpia	16	4, 200	2016-01-28	715	Phamal
Harpia	16	4, 200	2016-01-28	715	Piomel
Harpia	16	4, 200	2016-01-28	715	Ramtuc
Harpia	16	4, 200	2016-01-28	715	Rhemel
Harpia	16	4, 200	2016-01-28	715	Tyrsto
Harpia	16	4, 200	2016-01-28	715	Unk
Harpia	16	4, 200	2016-01-28	730	Atispa
Harpia	16	4, 200	2016-01-28	730	Atispa
Harpia	16	4, 200	2016-01-28	730	Camrub
Harpia	16	4, 200	2016-01-28	730	Celgra
Harpia	16	4, 200	2016-01-28	730	Cercin
Harpia	16	4, 200	2016-01-28	730	Galalb
Harpia	16	4, 200	2016-01-28	730	Glyspi
Harpia	16	4, 200	2016-01-28	730	Henleu
Harpia	16	4, 200	2016-01-28	730	Hylnae
Harpia	16	4, 200	2016-01-28	730	Liotho
Harpia	16	4, 200	2016-01-28	730	Lipvoc
Harpia	16	4, 200	2016-01-28	730	Melcru
Harpia	16	4, 200	2016-01-28	730	Myrbra
Harpia	16	4, 200	2016-01-28	730	Ramtuc
Harpia	16	4, 200	2016-01-28	730	Troruf
Harpia	16	4, 200	2016-01-28	730	Troruf
Harpia	16	4, 200	2016-01-28	730	Trovir
Harpia	16	4, 200	2016-01-28	730	Tyrsto
Harpia	16	4, 200	2016-01-28	730	Unk
Harpia	16	4, 200	2016-01-28	730	Xipgut
Harpia	16	4, 200	2016-01-28	730	Xipgut
Harpia	16	4, 200	2016-01-28	745	Atispa
Harpia	16	4, 200	2016-01-28	745	Camrub
Harpia	16	4, 200	2016-01-28	745	Cercin
Harpia	16	4, 200	2016-01-28	745	Dapame
Harpia	16	4, 200	2016-01-28	745	Lipvoc
Harpia	16	4, 200	2016-01-28	745	Myrbra
Harpia	16	4, 200	2016-01-28	745	Pitgro
Harpia	16	4, 200	2016-01-28	745	Ramtuc
Harpia	16	4, 200	2016-01-28	745	Ramvit
Harpia	16	4, 200	2016-01-28	745	Thacae
Harpia	16	4, 200	2016-01-28	745	Tyrsto
Harpia	16	4, 200	2016-01-28	800	Amafar
Harpia	16	4, 200	2016-01-28	800	Atispa
Harpia	16	4, 200	2016-01-28	800	Capnig
Harpia	16	4, 200	2016-01-28	800	Cercin
Harpia	16	4, 200	2016-01-28	800	Galalb
Harpia	16	4, 200	2016-01-28	800	Glyspi
Harpia	16	4, 200	2016-01-28	800	Hylnae
Harpia	16	4, 200	2016-01-28	800	Lipvoc
Harpia	16	4, 200	2016-01-28	800	Myrbra
Harpia	16	4, 200	2016-01-28	800	Myrlon
Harpia	16	4, 200	2016-01-28	800	Ramtuc
Harpia	16	4, 200	2016-01-28	800	Thacae
Harpia	16	4, 200	2016-01-28	800	Tyrsto
Harpia	16	6, 200	2016-01-28	545	Abucum
Harpia	16	6, 200	2016-01-28	545	Dencer
Harpia	16	6, 200	2016-01-28	545	Hylsub
Harpia	16	6, 200	2016-01-28	545	Liotho
Harpia	16	6, 200	2016-01-28	545	Mitsal
Harpia	16	6, 200	2016-01-28	600	Ancstr
Harpia	16	6, 200	2016-01-28	600	Atispa
Harpia	16	6, 200	2016-01-28	600	Freund
Harpia	16	6, 200	2016-01-28	600	Galalb
Harpia	16	6, 200	2016-01-28	600	Geomon
Harpia	16	6, 200	2016-01-28	600	Hylpoe
Harpia	16	6, 200	2016-01-28	600	Hylsub
Harpia	16	6, 200	2016-01-28	600	Liotho
Harpia	16	6, 200	2016-01-28	600	Lipvoc
Harpia	16	6, 200	2016-01-28	600	Myrbra
Harpia	16	6, 200	2016-01-28	600	Ramtuc
Harpia	16	6, 200	2016-01-28	600	Thamur
Harpia	16	6, 200	2016-01-28	600	Unk
Harpia	16	6, 200	2016-01-28	600	Unk
Harpia	16	6, 200	2016-01-28	600	Xipgut
Harpia	16	6, 200	2016-01-28	615	Atispa
Harpia	16	6, 200	2016-01-28	615	Cammel
Harpia	16	6, 200	2016-01-28	615	Capnig
Harpia	16	6, 200	2016-01-28	615	Cercin
Harpia	16	6, 200	2016-01-28	615	Colplu
Harpia	16	6, 200	2016-01-28	615	Cymlin
Harpia	16	6, 200	2016-01-28	615	Geomon
Harpia	16	6, 200	2016-01-28	615	Henleu
Harpia	16	6, 200	2016-01-28	615	Hylhyp
Harpia	16	6, 200	2016-01-28	615	Hylpoe
Harpia	16	6, 200	2016-01-28	615	Liotho
Harpia	16	6, 200	2016-01-28	615	Lipvoc
Harpia	16	6, 200	2016-01-28	615	Myrbra
Harpia	16	6, 200	2016-01-28	615	Myrmyo
Harpia	16	6, 200	2016-01-28	615	Ramtuc
Harpia	16	6, 200	2016-01-28	615	Ramvit
Harpia	16	6, 200	2016-01-28	615	Thamur
Harpia	16	6, 200	2016-01-28	615	Tinmaj
Harpia	16	6, 200	2016-01-28	615	Tolass
Harpia	16	6, 200	2016-01-28	615	Trovir
Harpia	16	6, 200	2016-01-28	615	Unk
Harpia	16	6, 200	2016-01-28	615	Xipgut
Harpia	16	6, 200	2016-01-28	630	Atispa
Harpia	16	6, 200	2016-01-28	630	Cammel
Harpia	16	6, 200	2016-01-28	630	Cercin
Harpia	16	6, 200	2016-01-28	630	Colplu
Harpia	16	6, 200	2016-01-28	630	Cymlin
Harpia	16	6, 200	2016-01-28	630	Galalb
Harpia	16	6, 200	2016-01-28	630	Geomon
Harpia	16	6, 200	2016-01-28	630	Hylnae
Harpia	16	6, 200	2016-01-28	630	Hylpoe
Harpia	16	6, 200	2016-01-28	630	Hylsub
Harpia	16	6, 200	2016-01-28	630	Liotho
Harpia	16	6, 200	2016-01-28	630	Lipvoc
Harpia	16	6, 200	2016-01-28	630	Piomen
Harpia	16	6, 200	2016-01-28	630	Ramtuc
Harpia	16	6, 200	2016-01-28	630	Thamur
Harpia	16	6, 200	2016-01-28	630	Thrcor
Harpia	16	6, 200	2016-01-28	630	Trovir
Harpia	16	6, 200	2016-01-28	630	Unk
Harpia	16	6, 200	2016-01-28	645	Amafar
Harpia	16	6, 200	2016-01-28	645	Atispa
Harpia	16	6, 200	2016-01-28	645	Autinf
Harpia	16	6, 200	2016-01-28	645	Brocya
Harpia	16	6, 200	2016-01-28	645	Camrub
Harpia	16	6, 200	2016-01-28	645	Cercin
Harpia	16	6, 200	2016-01-28	645	Colplu
Harpia	16	6, 200	2016-01-28	645	Cymlin
Harpia	16	6, 200	2016-01-28	645	Galalb
Harpia	16	6, 200	2016-01-28	645	Geomon
Harpia	16	6, 200	2016-01-28	645	Geomon
Harpia	16	6, 200	2016-01-28	645	Hylnae
Harpia	16	6, 200	2016-01-28	645	Hylsub
Harpia	16	6, 200	2016-01-28	645	Liotho
Harpia	16	6, 200	2016-01-28	645	Lipvoc
Harpia	16	6, 200	2016-01-28	645	Ramtuc
Harpia	16	6, 200	2016-01-28	645	Thrcor
Harpia	16	6, 200	2016-01-28	645	Trovir
Harpia	16	6, 200	2016-01-28	645	Unk
Harpia	16	6, 200	2016-01-28	700	Camrub
Harpia	16	6, 200	2016-01-28	700	Cercin
Harpia	16	6, 200	2016-01-28	700	Colplu
Harpia	16	6, 200	2016-01-28	700	Cymlin
Harpia	16	6, 200	2016-01-28	700	Denruf
Harpia	16	6, 200	2016-01-28	700	Geomon
Harpia	16	6, 200	2016-01-28	700	Hylnae
Harpia	16	6, 200	2016-01-28	700	Liotho
Harpia	16	6, 200	2016-01-28	700	Lipvoc
Harpia	16	6, 200	2016-01-28	700	Myrbra
Harpia	16	6, 200	2016-01-28	700	Ramtuc
Harpia	16	6, 200	2016-01-28	700	Tolass
Harpia	16	6, 200	2016-01-28	700	Unk
Harpia	16	6, 200	2016-01-28	715	Brocya
Harpia	16	6, 200	2016-01-28	715	Camrub
Harpia	16	6, 200	2016-01-28	715	Capnig
Harpia	16	6, 200	2016-01-28	715	Celgra
Harpia	16	6, 200	2016-01-28	715	Cercin
Harpia	16	6, 200	2016-01-28	715	Cymlin
Harpia	16	6, 200	2016-01-28	715	Dapame
Harpia	16	6, 200	2016-01-28	715	Denruf
Harpia	16	6, 200	2016-01-28	715	Geomon
Harpia	16	6, 200	2016-01-28	715	Hylhyp
Harpia	16	6, 200	2016-01-28	715	Hylnae
Harpia	16	6, 200	2016-01-28	715	Hypcan
Harpia	16	6, 200	2016-01-28	715	Liotho
Harpia	16	6, 200	2016-01-28	715	Lipvoc
Harpia	16	6, 200	2016-01-28	715	Phiert
Harpia	16	6, 200	2016-01-28	715	Ramtuc
Harpia	16	6, 200	2016-01-28	715	Unk
Harpia	16	6, 200	2016-01-28	730	Brocya
Harpia	16	6, 200	2016-01-28	730	Camrub
Harpia	16	6, 200	2016-01-28	730	Celgra
Harpia	16	6, 200	2016-01-28	730	Colplu
Harpia	16	6, 200	2016-01-28	730	Cymlin
Harpia	16	6, 200	2016-01-28	730	Geomon
Harpia	16	6, 200	2016-01-28	730	Glyspi
Harpia	16	6, 200	2016-01-28	730	Liotho
Harpia	16	6, 200	2016-01-28	730	Lipvoc
Harpia	16	6, 200	2016-01-28	730	Piomel
Harpia	16	6, 200	2016-01-28	730	Troruf
Harpia	16	6, 200	2016-01-28	730	Unk
Harpia	16	6, 200	2016-01-28	745	Camrub
Harpia	16	6, 200	2016-01-28	745	Capnig
Harpia	16	6, 200	2016-01-28	745	Colplu
Harpia	16	6, 200	2016-01-28	745	Dapame
Harpia	16	6, 200	2016-01-28	745	Geomon
Harpia	16	6, 200	2016-01-28	745	Liotho
Harpia	16	6, 200	2016-01-28	745	Lipvoc
Harpia	16	6, 200	2016-01-28	745	Ramtuc
Harpia	16	6, 200	2016-01-28	745	Ramvit
Harpia	16	6, 200	2016-01-28	745	Tingut
Harpia	16	6, 200	2016-01-28	745	Xipgut
Harpia	16	6, 200	2016-01-28	800	Amafar
Harpia	16	6, 200	2016-01-28	800	Camrub
Harpia	16	6, 200	2016-01-28	800	Capnig
Harpia	16	6, 200	2016-01-28	800	Celgra
Harpia	16	6, 200	2016-01-28	800	Lipvoc
Harpia	16	6, 200	2016-01-28	800	Ramtuc
Harpia	16	6, 200	2016-01-28	800	Ramvit
Harpia	16	6, 200	2016-01-28	800	Selrei
Harpia	16	8, 200	2016-01-28	545	Abucum
Harpia	16	8, 200	2016-01-28	545	Barmar
Harpia	16	8, 200	2016-01-28	545	Buccap
Harpia	16	8, 200	2016-01-28	545	Cryvar
Harpia	16	8, 200	2016-01-28	545	Jacaur
Harpia	16	8, 200	2016-01-28	545	Pipchl
Harpia	16	8, 200	2016-01-28	545	Xipgut
Harpia	16	8, 200	2016-01-28	600	Cercin
Harpia	16	8, 200	2016-01-28	600	Crycin
Harpia	16	8, 200	2016-01-28	600	Cryvar
Harpia	16	8, 200	2016-01-28	600	Denruf
Harpia	16	8, 200	2016-01-28	600	Galalb
Harpia	16	8, 200	2016-01-28	600	Geomon
Harpia	16	8, 200	2016-01-28	600	Hylpoe
Harpia	16	8, 200	2016-01-28	600	Hylsub
Harpia	16	8, 200	2016-01-28	600	Hyphyp
Harpia	16	8, 200	2016-01-28	600	Jacaur
Harpia	16	8, 200	2016-01-28	600	Liotho
Harpia	16	8, 200	2016-01-28	600	Lipvoc
Harpia	16	8, 200	2016-01-28	600	Myrfor
Harpia	16	8, 200	2016-01-28	600	Piomel
Harpia	16	8, 200	2016-01-28	600	Pipcor
Harpia	16	8, 200	2016-01-28	600	Pygste
Harpia	16	8, 200	2016-01-28	600	Quepur
Harpia	16	8, 200	2016-01-28	600	Ramtuc
Harpia	16	8, 200	2016-01-28	600	Thamur
Harpia	16	8, 200	2016-01-28	600	Thasch
Harpia	16	8, 200	2016-01-28	600	Tingut
Harpia	16	8, 200	2016-01-28	615	Amafar
Harpia	16	8, 200	2016-01-28	615	Cammel
Harpia	16	8, 200	2016-01-28	615	Camrub
Harpia	16	8, 200	2016-01-28	615	Colplu
Harpia	16	8, 200	2016-01-28	615	Cymlin
Harpia	16	8, 200	2016-01-28	615	Geomon
Harpia	16	8, 200	2016-01-28	615	Hylpoe
Harpia	16	8, 200	2016-01-28	615	Hyphyp
Harpia	16	8, 200	2016-01-28	615	Liotho
Harpia	16	8, 200	2016-01-28	615	Lipvoc
Harpia	16	8, 200	2016-01-28	615	Piomel
Harpia	16	8, 200	2016-01-28	615	Pipcor
Harpia	16	8, 200	2016-01-28	615	Quepur
Harpia	16	8, 200	2016-01-28	615	Ramtuc
Harpia	16	8, 200	2016-01-28	615	Ramvit
Harpia	16	8, 200	2016-01-28	615	Thamur
Harpia	16	8, 200	2016-01-28	615	Tingut
Harpia	16	8, 200	2016-01-28	615	Trovir
Harpia	16	8, 200	2016-01-28	615	Unk
Harpia	16	8, 200	2016-01-28	630	Brocya
Harpia	16	8, 200	2016-01-28	630	Cammel
Harpia	16	8, 200	2016-01-28	630	Camrub
Harpia	16	8, 200	2016-01-28	630	Colplu
Harpia	16	8, 200	2016-01-28	630	Cymlin
Harpia	16	8, 200	2016-01-28	630	Geomon
Harpia	16	8, 200	2016-01-28	630	Hemzos
Harpia	16	8, 200	2016-01-28	630	Hylpoe
Harpia	16	8, 200	2016-01-28	630	Lipvoc
Harpia	16	8, 200	2016-01-28	630	Pipcor
Harpia	16	8, 200	2016-01-28	630	Pipery
Harpia	16	8, 200	2016-01-28	630	Quepur
Harpia	16	8, 200	2016-01-28	630	Ramtuc
Harpia	16	8, 200	2016-01-28	630	Thamur
Harpia	16	8, 200	2016-01-28	630	Trovir
Harpia	16	8, 200	2016-01-28	645	Brocya
Harpia	16	8, 200	2016-01-28	645	Colplu
Harpia	16	8, 200	2016-01-28	645	Cymlin
Harpia	16	8, 200	2016-01-28	645	Geomon
Harpia	16	8, 200	2016-01-28	645	Lipvoc
Harpia	16	8, 200	2016-01-28	645	Myrfor
Harpia	16	8, 200	2016-01-28	645	Pipcor
Harpia	16	8, 200	2016-01-28	645	Quepur
Harpia	16	8, 200	2016-01-28	645	Ramtuc
Harpia	16	8, 200	2016-01-28	645	Rhysim
Harpia	16	8, 200	2016-01-28	645	Thaard
Harpia	16	8, 200	2016-01-28	645	Thacae
Harpia	16	8, 200	2016-01-28	645	Thamur
Harpia	16	8, 200	2016-01-28	645	Tolass
Harpia	16	8, 200	2016-01-28	645	Unk
Harpia	16	8, 200	2016-01-28	700	Cercin
Harpia	16	8, 200	2016-01-28	700	Denruf
Harpia	16	8, 200	2016-01-28	700	Geomon
Harpia	16	8, 200	2016-01-28	700	Hyphyp
Harpia	16	8, 200	2016-01-28	700	Lipvoc
Harpia	16	8, 200	2016-01-28	700	Myrbra
Harpia	16	8, 200	2016-01-28	700	Myrhau
Harpia	16	8, 200	2016-01-28	700	Pipcor
Harpia	16	8, 200	2016-01-28	700	Psadec
Harpia	16	8, 200	2016-01-28	700	Pygste
Harpia	16	8, 200	2016-01-28	700	Ramtuc
Harpia	16	8, 200	2016-01-28	700	Thamur
Harpia	16	8, 200	2016-01-28	700	Tolass
Harpia	16	8, 200	2016-01-28	700	Unk
Harpia	16	8, 200	2016-01-28	700	Unk
Harpia	16	8, 200	2016-01-28	700	Unk
Harpia	16	8, 200	2016-01-28	700	Xipgut
Harpia	16	8, 200	2016-01-28	715	Brocya
Harpia	16	8, 200	2016-01-28	715	Camrub
Harpia	16	8, 200	2016-01-28	715	Capnig
Harpia	16	8, 200	2016-01-28	715	Cercin
Harpia	16	8, 200	2016-01-28	715	Colplu
Harpia	16	8, 200	2016-01-28	715	Dapame
Harpia	16	8, 200	2016-01-28	715	Denruf
Harpia	16	8, 200	2016-01-28	715	Eupxan
Harpia	16	8, 200	2016-01-28	715	Geomon
Harpia	16	8, 200	2016-01-28	715	Glyspi
Harpia	16	8, 200	2016-01-28	715	Hylhyp
Harpia	16	8, 200	2016-01-28	715	Hyphyp
Harpia	16	8, 200	2016-01-28	715	Lipvoc
Harpia	16	8, 200	2016-01-28	715	Monmor
Harpia	16	8, 200	2016-01-28	715	Myigai
Harpia	16	8, 200	2016-01-28	715	Pipcor
Harpia	16	8, 200	2016-01-28	715	Polplu
Harpia	16	8, 200	2016-01-28	715	Psavir
Harpia	16	8, 200	2016-01-28	715	Pygste
Harpia	16	8, 200	2016-01-28	715	Rammel
Harpia	16	8, 200	2016-01-28	715	Ramtuc
Harpia	16	8, 200	2016-01-28	715	Ramvit
Harpia	16	8, 200	2016-01-28	715	Thamur
Harpia	16	8, 200	2016-01-28	715	Tolass
Harpia	16	8, 200	2016-01-28	715	Trovio
Harpia	16	8, 200	2016-01-28	715	Unk
Harpia	16	8, 200	2016-01-28	715	Unk
Harpia	16	8, 200	2016-01-28	730	Brocya
Harpia	16	8, 200	2016-01-28	730	Camrub
Harpia	16	8, 200	2016-01-28	730	Capnig
Harpia	16	8, 200	2016-01-28	730	Cercin
Harpia	16	8, 200	2016-01-28	730	Colplu
Harpia	16	8, 200	2016-01-28	730	Cymlin
Harpia	16	8, 200	2016-01-28	730	Dapame
Harpia	16	8, 200	2016-01-28	730	Geomon
Harpia	16	8, 200	2016-01-28	730	Hylhyp
Harpia	16	8, 200	2016-01-28	730	Hyphyp
Harpia	16	8, 200	2016-01-28	730	Liotho
Harpia	16	8, 200	2016-01-28	730	Lipvoc
Harpia	16	8, 200	2016-01-28	730	Monmor
Harpia	16	8, 200	2016-01-28	730	Myrbra
Harpia	16	8, 200	2016-01-28	730	Piomel
Harpia	16	8, 200	2016-01-28	730	Pipcor
Harpia	16	8, 200	2016-01-28	730	Pygste
Harpia	16	8, 200	2016-01-28	730	Selrei
Harpia	16	8, 200	2016-01-28	730	Thamur
Harpia	16	8, 200	2016-01-28	730	Tolass
Harpia	16	8, 200	2016-01-28	730	Tromel
Harpia	16	8, 200	2016-01-28	730	Trovio
Harpia	16	8, 200	2016-01-28	745	Ancstr
Harpia	16	8, 200	2016-01-28	745	Brocya
Harpia	16	8, 200	2016-01-28	745	Camrub
Harpia	16	8, 200	2016-01-28	745	Capnig
Harpia	16	8, 200	2016-01-28	745	Cercin
Harpia	16	8, 200	2016-01-28	745	Colplu
Harpia	16	8, 200	2016-01-28	745	Cymlin
Harpia	16	8, 200	2016-01-28	745	Dapame
Harpia	16	8, 200	2016-01-28	745	Eupxan
Harpia	16	8, 200	2016-01-28	745	Geomon
Harpia	16	8, 200	2016-01-28	745	Hemzos
Harpia	16	8, 200	2016-01-28	745	Hylhyp
Harpia	16	8, 200	2016-01-28	745	Hyphyp
Harpia	16	8, 200	2016-01-28	745	Jacaur
Harpia	16	8, 200	2016-01-28	745	Liotho
Harpia	16	8, 200	2016-01-28	745	Lipvoc
Harpia	16	8, 200	2016-01-28	745	Myigai
Harpia	16	8, 200	2016-01-28	745	Piomel
Harpia	16	8, 200	2016-01-28	745	Pipcor
Harpia	16	8, 200	2016-01-28	745	Pygste
Harpia	16	8, 200	2016-01-28	745	Ramtuc
Harpia	16	8, 200	2016-01-28	745	Ramvit
Harpia	16	8, 200	2016-01-28	745	Thamur
Harpia	16	8, 200	2016-01-28	745	Tolass
Harpia	16	8, 200	2016-01-28	745	Unk
Harpia	16	8, 200	2016-01-28	745	Unk
Harpia	16	8, 200	2016-01-28	745	Venaff
Harpia	16	8, 200	2016-01-28	800	Amafar
Harpia	16	8, 200	2016-01-28	800	Aramac
Harpia	16	8, 200	2016-01-28	800	Capnig
Harpia	16	8, 200	2016-01-28	800	Cercin
Harpia	16	8, 200	2016-01-28	800	Hyphyp
Harpia	16	8, 200	2016-01-28	800	Lipvoc
Harpia	16	8, 200	2016-01-28	800	Myigai
Harpia	16	8, 200	2016-01-28	800	Piacay
Harpia	16	8, 200	2016-01-28	800	Pipcor
Harpia	16	8, 200	2016-01-28	800	Psavir
Harpia	16	8, 200	2016-01-28	800	Pygste
Harpia	16	8, 200	2016-01-28	800	Ramtuc
Harpia	16	8, 200	2016-01-28	800	Ramvit
Harpia	16	8, 200	2016-01-28	800	Tolass
Harpia	16	8, 200	2016-01-28	800	Trovir
Harpia	16	1, 400	2016-01-30	545	Barmar
Harpia	16	1, 400	2016-01-30	545	Buccap
Harpia	16	1, 400	2016-01-30	545	Cichuh
Harpia	16	1, 400	2016-01-30	545	Geomon
Harpia	16	1, 400	2016-01-30	545	Micgil
Harpia	16	1, 400	2016-01-30	545	Mitsal
Harpia	16	1, 400	2016-01-30	545	Nycoce
Harpia	16	1, 400	2016-01-30	545	Otuwat
Harpia	16	1, 400	2016-01-30	545	Phiert
Harpia	16	1, 400	2016-01-30	600	Autinf
Harpia	16	1, 400	2016-01-30	600	Cryund
Harpia	16	1, 400	2016-01-30	600	Cryvar
Harpia	16	1, 400	2016-01-30	600	Hypcan
Harpia	16	1, 400	2016-01-30	600	Phiert
Harpia	16	1, 400	2016-01-30	600	Psavir
Harpia	16	1, 400	2016-01-30	600	Thamur
Harpia	16	1, 400	2016-01-30	600	Unk
Harpia	16	1, 400	2016-01-30	600	Xipgut
Harpia	16	1, 400	2016-01-30	615	Brocya
Harpia	16	1, 400	2016-01-30	615	Capnig
Harpia	16	1, 400	2016-01-30	615	Colplu
Harpia	16	1, 400	2016-01-30	615	Cryund
Harpia	16	1, 400	2016-01-30	615	Cryvar
Harpia	16	1, 400	2016-01-30	615	Cymlin
Harpia	16	1, 400	2016-01-30	615	Geomon
Harpia	16	1, 400	2016-01-30	615	Glyspi
Harpia	16	1, 400	2016-01-30	615	Hypcan
Harpia	16	1, 400	2016-01-30	615	Lopvit
Harpia	16	1, 400	2016-01-30	615	Myrbra
Harpia	16	1, 400	2016-01-30	615	Pipcor
Harpia	16	1, 400	2016-01-30	615	Quepur
Harpia	16	1, 400	2016-01-30	615	Ramvit
Harpia	16	1, 400	2016-01-30	615	Thamur
Harpia	16	1, 400	2016-01-30	615	Tinmaj
Harpia	16	1, 400	2016-01-30	615	Unk
Harpia	16	1, 400	2016-01-30	615	Xipgut
Harpia	16	1, 400	2016-01-30	630	Atispa
Harpia	16	1, 400	2016-01-30	630	Barmar
Harpia	16	1, 400	2016-01-30	630	Capnig
Harpia	16	1, 400	2016-01-30	630	Cercin
Harpia	16	1, 400	2016-01-30	630	Colplu
Harpia	16	1, 400	2016-01-30	630	Cryvar
Harpia	16	1, 400	2016-01-30	630	Cymlin
Harpia	16	1, 400	2016-01-30	630	Geomon
Harpia	16	1, 400	2016-01-30	630	Hypcan
Harpia	16	1, 400	2016-01-30	630	Myrbra
Harpia	16	1, 400	2016-01-30	630	Myrmyo
Harpia	16	1, 400	2016-01-30	630	Piacay
Harpia	16	1, 400	2016-01-30	630	Pipcor
Harpia	16	1, 400	2016-01-30	630	Quepur
Harpia	16	1, 400	2016-01-30	630	Thamur
Harpia	16	1, 400	2016-01-30	630	Turlaw
Harpia	16	1, 400	2016-01-30	630	Xipgut
Harpia	16	1, 400	2016-01-30	645	Atispa
Harpia	16	1, 400	2016-01-30	645	Barmar
Harpia	16	1, 400	2016-01-30	645	Capnig
Harpia	16	1, 400	2016-01-30	645	Cercin
Harpia	16	1, 400	2016-01-30	645	Colplu
Harpia	16	1, 400	2016-01-30	645	Geomon
Harpia	16	1, 400	2016-01-30	645	Hypcan
Harpia	16	1, 400	2016-01-30	645	Myrbra
Harpia	16	1, 400	2016-01-30	645	Myrmyo
Harpia	16	1, 400	2016-01-30	645	Pipcor
Harpia	16	1, 400	2016-01-30	645	Thamur
Harpia	16	1, 400	2016-01-30	645	Turlaw
Harpia	16	1, 400	2016-01-30	645	Xipgut
Harpia	16	1, 400	2016-01-30	700	Araara
Harpia	16	1, 400	2016-01-30	700	Barmar
Harpia	16	1, 400	2016-01-30	700	Capnig
Harpia	16	1, 400	2016-01-30	700	Colplu
Harpia	16	1, 400	2016-01-30	700	Geomon
Harpia	16	1, 400	2016-01-30	700	Hylnae
Harpia	16	1, 400	2016-01-30	700	Hypcan
Harpia	16	1, 400	2016-01-30	700	Lopvit
Harpia	16	1, 400	2016-01-30	700	Melcru
Harpia	16	1, 400	2016-01-30	700	Myrbra
Harpia	16	1, 400	2016-01-30	700	Pipcor
Harpia	16	1, 400	2016-01-30	700	Quepur
Harpia	16	1, 400	2016-01-30	700	Ramtuc
Harpia	16	1, 400	2016-01-30	700	Ramvit
Harpia	16	1, 400	2016-01-30	700	Thamur
Harpia	16	1, 400	2016-01-30	700	Unk
Harpia	16	1, 400	2016-01-30	715	Amafar
Harpia	16	1, 400	2016-01-30	715	Aramac
Harpia	16	1, 400	2016-01-30	715	Atispa
Harpia	16	1, 400	2016-01-30	715	Cammel
Harpia	16	1, 400	2016-01-30	715	Capnig
Harpia	16	1, 400	2016-01-30	715	Colplu
Harpia	16	1, 400	2016-01-30	715	Geomon
Harpia	16	1, 400	2016-01-30	715	Hypcan
Harpia	16	1, 400	2016-01-30	715	Melcru
Harpia	16	1, 400	2016-01-30	715	Myrbra
Harpia	16	1, 400	2016-01-30	715	Pipcor
Harpia	16	1, 400	2016-01-30	715	Pitgro
Harpia	16	1, 400	2016-01-30	715	Quepur
Harpia	16	1, 400	2016-01-30	715	Thamur
Harpia	16	1, 400	2016-01-30	715	Turlaw
Harpia	16	1, 400	2016-01-30	730	Amafar
Harpia	16	1, 400	2016-01-30	730	Atispa
Harpia	16	1, 400	2016-01-30	730	Brocya
Harpia	16	1, 400	2016-01-30	730	Colplu
Harpia	16	1, 400	2016-01-30	730	Geomon
Harpia	16	1, 400	2016-01-30	730	Hypcan
Harpia	16	1, 400	2016-01-30	730	Liotho
Harpia	16	1, 400	2016-01-30	730	Myrbra
Harpia	16	1, 400	2016-01-30	730	Pipcor
Harpia	16	1, 400	2016-01-30	730	Pitgro
Harpia	16	1, 400	2016-01-30	730	Quepur
Harpia	16	1, 400	2016-01-30	730	Unk
Harpia	16	1, 400	2016-01-30	730	Xipgut
Harpia	16	1, 400	2016-01-30	745	Amafar
Harpia	16	1, 400	2016-01-30	745	Atispa
Harpia	16	1, 400	2016-01-30	745	Camrub
Harpia	16	1, 400	2016-01-30	745	Dapame
Harpia	16	1, 400	2016-01-30	745	Hemzos
Harpia	16	1, 400	2016-01-30	745	Hypcan
Harpia	16	1, 400	2016-01-30	745	Pipcor
Harpia	16	1, 400	2016-01-30	745	Ramvit
Harpia	16	1, 400	2016-01-30	745	Turlaw
Harpia	16	1, 400	2016-01-30	745	Xipgut
Harpia	16	1, 400	2016-01-30	800	Amafar
Harpia	16	1, 400	2016-01-30	800	Atispa
Harpia	16	1, 400	2016-01-30	800	Brocya
Harpia	16	1, 400	2016-01-30	800	Camrub
Harpia	16	1, 400	2016-01-30	800	Camtur
Harpia	16	1, 400	2016-01-30	800	Cercin
Harpia	16	1, 400	2016-01-30	800	Colplu
Harpia	16	1, 400	2016-01-30	800	Colsub
Harpia	16	1, 400	2016-01-30	800	Myrbra
Harpia	16	1, 400	2016-01-30	800	Myrfor
Harpia	16	1, 400	2016-01-30	800	Pipcor
Harpia	16	1, 400	2016-01-30	800	Quepur
Harpia	16	1, 400	2016-01-30	800	Quepur
Harpia	16	1, 400	2016-01-30	800	Unk
Harpia	16	3, 400	2016-01-30	545	Cichuh
Harpia	16	3, 400	2016-01-30	545	Geomon
Harpia	16	3, 400	2016-01-30	545	Hylsub
Harpia	16	3, 400	2016-01-30	545	Mitsal
Harpia	16	3, 400	2016-01-30	545	Nycoce
Harpia	16	3, 400	2016-01-30	545	Otuwat
Harpia	16	3, 400	2016-01-30	545	Phiert
Harpia	16	3, 400	2016-01-30	600	Autinf
Harpia	16	3, 400	2016-01-30	600	Cercin
Harpia	16	3, 400	2016-01-30	600	Cryvar
Harpia	16	3, 400	2016-01-30	600	Hylnae
Harpia	16	3, 400	2016-01-30	600	Hylsub
Harpia	16	3, 400	2016-01-30	600	Hypcan
Harpia	16	3, 400	2016-01-30	600	Phiert
Harpia	16	3, 400	2016-01-30	600	Rammel
Harpia	16	3, 400	2016-01-30	600	Rammel
Harpia	16	3, 400	2016-01-30	600	Ramtuc
Harpia	16	3, 400	2016-01-30	600	Thasch
Harpia	16	3, 400	2016-01-30	600	Xipgut
Harpia	16	3, 400	2016-01-30	615	Autinf
Harpia	16	3, 400	2016-01-30	615	Colplu
Harpia	16	3, 400	2016-01-30	615	Glyspi
Harpia	16	3, 400	2016-01-30	615	Hylhyp
Harpia	16	3, 400	2016-01-30	615	Hypcan
Harpia	16	3, 400	2016-01-30	615	Myraxi
Harpia	16	3, 400	2016-01-30	615	Piomen
Harpia	16	3, 400	2016-01-30	615	Rammel
Harpia	16	3, 400	2016-01-30	615	Ramtuc
Harpia	16	3, 400	2016-01-30	615	Thasch
Harpia	16	3, 400	2016-01-30	615	Tinmaj
Harpia	16	3, 400	2016-01-30	615	Unk
Harpia	16	3, 400	2016-01-30	630	Amafar
Harpia	16	3, 400	2016-01-30	630	Autinf
Harpia	16	3, 400	2016-01-30	630	Colplu
Harpia	16	3, 400	2016-01-30	630	Geomon
Harpia	16	3, 400	2016-01-30	630	Hylhyp
Harpia	16	3, 400	2016-01-30	630	Hypcan
Harpia	16	3, 400	2016-01-30	630	Myrbra
Harpia	16	3, 400	2016-01-30	630	Phlery
Harpia	16	3, 400	2016-01-30	630	Psavir
Harpia	16	3, 400	2016-01-30	630	Rammel
Harpia	16	3, 400	2016-01-30	630	Tinmaj
Harpia	16	3, 400	2016-01-30	630	Xipgut
Harpia	16	3, 400	2016-01-30	645	Autinf
Harpia	16	3, 400	2016-01-30	645	Cercin
Harpia	16	3, 400	2016-01-30	645	Colplu
Harpia	16	3, 400	2016-01-30	645	Geomon
Harpia	16	3, 400	2016-01-30	645	Hylhyp
Harpia	16	3, 400	2016-01-30	645	Hylpoe
Harpia	16	3, 400	2016-01-30	645	Hypcan
Harpia	16	3, 400	2016-01-30	645	Myrbra
Harpia	16	3, 400	2016-01-30	645	Thacae
Harpia	16	3, 400	2016-01-30	645	Thasch
Harpia	16	3, 400	2016-01-30	645	Tinmaj
Harpia	16	3, 400	2016-01-30	645	Tolass
Harpia	16	3, 400	2016-01-30	645	Unk
Harpia	16	3, 400	2016-01-30	700	Aramac
Harpia	16	3, 400	2016-01-30	700	Cammel
Harpia	16	3, 400	2016-01-30	700	Capnig
Harpia	16	3, 400	2016-01-30	700	Cercin
Harpia	16	3, 400	2016-01-30	700	Colplu
Harpia	16	3, 400	2016-01-30	700	Geomon
Harpia	16	3, 400	2016-01-30	700	Hypcan
Harpia	16	3, 400	2016-01-30	700	Micmar
Harpia	16	3, 400	2016-01-30	700	Myrcam
Harpia	16	3, 400	2016-01-30	700	Piomen
Harpia	16	3, 400	2016-01-30	700	Psavir
Harpia	16	3, 400	2016-01-30	700	Rammel
Harpia	16	3, 400	2016-01-30	700	Ramtuc
Harpia	16	3, 400	2016-01-30	700	Ramvit
Harpia	16	3, 400	2016-01-30	700	Tromel
Harpia	16	3, 400	2016-01-30	700	Unk
Harpia	16	3, 400	2016-01-30	715	Aramac
Harpia	16	3, 400	2016-01-30	715	Cammel
Harpia	16	3, 400	2016-01-30	715	Cercin
Harpia	16	3, 400	2016-01-30	715	Geomon
Harpia	16	3, 400	2016-01-30	715	Hylpoe
Harpia	16	3, 400	2016-01-30	715	Hypcan
Harpia	16	3, 400	2016-01-30	715	Pitgro
Harpia	16	3, 400	2016-01-30	715	Psavir
Harpia	16	3, 400	2016-01-30	715	Ramtuc
Harpia	16	3, 400	2016-01-30	715	Unk
Harpia	16	3, 400	2016-01-30	730	Brocya
Harpia	16	3, 400	2016-01-30	730	Cercin
Harpia	16	3, 400	2016-01-30	730	Colplu
Harpia	16	3, 400	2016-01-30	730	Cyacya
Harpia	16	3, 400	2016-01-30	730	Geomon
Harpia	16	3, 400	2016-01-30	730	Hypcan
Harpia	16	3, 400	2016-01-30	730	Myrfje
Harpia	16	3, 400	2016-01-30	730	Ramtuc
Harpia	16	3, 400	2016-01-30	730	Thasch
Harpia	16	3, 400	2016-01-30	745	Amafar
Harpia	16	3, 400	2016-01-30	745	Capnig
Harpia	16	3, 400	2016-01-30	745	Cercin
Harpia	16	3, 400	2016-01-30	745	Colplu
Harpia	16	3, 400	2016-01-30	745	Geomon
Harpia	16	3, 400	2016-01-30	745	Hylpoe
Harpia	16	3, 400	2016-01-30	745	Hypcan
Harpia	16	3, 400	2016-01-30	745	Micmar
Harpia	16	3, 400	2016-01-30	745	Myrbra
Harpia	16	3, 400	2016-01-30	745	Myrcam
Harpia	16	3, 400	2016-01-30	745	Piomel
Harpia	16	3, 400	2016-01-30	745	Thacae
Harpia	16	3, 400	2016-01-30	745	Tromel
Harpia	16	3, 400	2016-01-30	745	Unk
Harpia	16	3, 400	2016-01-30	745	Xipgut
Harpia	16	3, 400	2016-01-30	800	Amafar
Harpia	16	3, 400	2016-01-30	800	Cercin
Harpia	16	3, 400	2016-01-30	800	Colsub
Harpia	16	3, 400	2016-01-30	800	Forcol
Harpia	16	3, 400	2016-01-30	800	Geomon
Harpia	16	3, 400	2016-01-30	800	Myrcam
Harpia	16	3, 400	2016-01-30	800	Myrlon
Harpia	16	3, 400	2016-01-30	800	Piomel
Harpia	16	3, 400	2016-01-30	800	Psavir
Harpia	16	3, 400	2016-01-30	800	Ramtuc
Harpia	16	3, 400	2016-01-30	800	Thacae
Harpia	16	3, 400	2016-01-30	800	Thasch
Harpia	16	3, 400	2016-01-30	800	Unk
Harpia	16	3, 400	2016-01-30	800	Unk
Harpia	16	5, 400	2016-01-30	545	Barmar
Harpia	16	5, 400	2016-01-30	545	Buccap
Harpia	16	5, 400	2016-01-30	545	Hylsub
Harpia	16	5, 400	2016-01-30	545	Myrcam
Harpia	16	5, 400	2016-01-30	600	Ancstr
Harpia	16	5, 400	2016-01-30	600	Buccap
Harpia	16	5, 400	2016-01-30	600	Cammel
Harpia	16	5, 400	2016-01-30	600	Camtur
Harpia	16	5, 400	2016-01-30	600	Cymlin
Harpia	16	5, 400	2016-01-30	600	Hylpoe
Harpia	16	5, 400	2016-01-30	600	Hyphyp
Harpia	16	5, 400	2016-01-30	600	Liotho
Harpia	16	5, 400	2016-01-30	600	Lipvoc
Harpia	16	5, 400	2016-01-30	600	Myrcam
Harpia	16	5, 400	2016-01-30	600	Ramtuc
Harpia	16	5, 400	2016-01-30	600	Thaard
Harpia	16	5, 400	2016-01-30	600	Thamur
Harpia	16	5, 400	2016-01-30	600	Thasch
Harpia	16	5, 400	2016-01-30	600	Thrcor
Harpia	16	5, 400	2016-01-30	600	Unk
Harpia	16	5, 400	2016-01-30	615	Cercin
Harpia	16	5, 400	2016-01-30	615	Colplu
Harpia	16	5, 400	2016-01-30	615	Cymlin
Harpia	16	5, 400	2016-01-30	615	Eupxan
Harpia	16	5, 400	2016-01-30	615	Geomon
Harpia	16	5, 400	2016-01-30	615	Hylhyp
Harpia	16	5, 400	2016-01-30	615	Hylpoe
Harpia	16	5, 400	2016-01-30	615	Liotho
Harpia	16	5, 400	2016-01-30	615	Myigai
Harpia	16	5, 400	2016-01-30	615	Myraxi
Harpia	16	5, 400	2016-01-30	615	Myrbra
Harpia	16	5, 400	2016-01-30	615	Myrcam
Harpia	16	5, 400	2016-01-30	615	Piomel
Harpia	16	5, 400	2016-01-30	615	Psavir
Harpia	16	5, 400	2016-01-30	615	Thaard
Harpia	16	5, 400	2016-01-30	615	Tyrsto
Harpia	16	5, 400	2016-01-30	615	Unk
Harpia	16	5, 400	2016-01-30	630	Celele
Harpia	16	5, 400	2016-01-30	630	Cercin
Harpia	16	5, 400	2016-01-30	630	Colplu
Harpia	16	5, 400	2016-01-30	630	Cymlin
Harpia	16	5, 400	2016-01-30	630	Geomon
Harpia	16	5, 400	2016-01-30	630	Hylpoe
Harpia	16	5, 400	2016-01-30	630	Hyphyp
Harpia	16	5, 400	2016-01-30	630	Liotho
Harpia	16	5, 400	2016-01-30	630	Myrcam
Harpia	16	5, 400	2016-01-30	630	Piomel
Harpia	16	5, 400	2016-01-30	630	Psavir
Harpia	16	5, 400	2016-01-30	630	Tyrsto
Harpia	16	5, 400	2016-01-30	630	Unk
Harpia	16	5, 400	2016-01-30	630	Unk
Harpia	16	5, 400	2016-01-30	645	Brocya
Harpia	16	5, 400	2016-01-30	645	Capnig
Harpia	16	5, 400	2016-01-30	645	Cercin
Harpia	16	5, 400	2016-01-30	645	Chipar
Harpia	16	5, 400	2016-01-30	645	Colplu
Harpia	16	5, 400	2016-01-30	645	Cymlin
Harpia	16	5, 400	2016-01-30	645	Hylpoe
Harpia	16	5, 400	2016-01-30	645	Hypcan
Harpia	16	5, 400	2016-01-30	645	Liotho
Harpia	16	5, 400	2016-01-30	645	Myrcam
Harpia	16	5, 400	2016-01-30	645	Thrcor
Harpia	16	5, 400	2016-01-30	645	Troruf
Harpia	16	5, 400	2016-01-30	645	Tyrsto
Harpia	16	5, 400	2016-01-30	645	Unk
Harpia	16	5, 400	2016-01-30	700	Aramac
Harpia	16	5, 400	2016-01-30	700	Camrub
Harpia	16	5, 400	2016-01-30	700	Capnig
Harpia	16	5, 400	2016-01-30	700	Cercin
Harpia	16	5, 400	2016-01-30	700	Colplu
Harpia	16	5, 400	2016-01-30	700	Cymlin
Harpia	16	5, 400	2016-01-30	700	Forcol
Harpia	16	5, 400	2016-01-30	700	Hemzos
Harpia	16	5, 400	2016-01-30	700	Hylpoe
Harpia	16	5, 400	2016-01-30	700	Hypcan
Harpia	16	5, 400	2016-01-30	700	Liotho
Harpia	16	5, 400	2016-01-30	700	Myrcam
Harpia	16	5, 400	2016-01-30	700	Psavir
Harpia	16	5, 400	2016-01-30	700	Ramtuc
Harpia	16	5, 400	2016-01-30	700	Ramvit
Harpia	16	5, 400	2016-01-30	700	Thamur
Harpia	16	5, 400	2016-01-30	700	Tromel
Harpia	16	5, 400	2016-01-30	700	Tyrsto
Harpia	16	5, 400	2016-01-30	700	Unk
Harpia	16	5, 400	2016-01-30	700	Unk
Harpia	16	5, 400	2016-01-30	715	Aramac
Harpia	16	5, 400	2016-01-30	715	Cammel
Harpia	16	5, 400	2016-01-30	715	Camrub
Harpia	16	5, 400	2016-01-30	715	Cercin
Harpia	16	5, 400	2016-01-30	715	Colplu
Harpia	16	5, 400	2016-01-30	715	Cymlin
Harpia	16	5, 400	2016-01-30	715	Hemzos
Harpia	16	5, 400	2016-01-30	715	Hylpoe
Harpia	16	5, 400	2016-01-30	715	Liotho
Harpia	16	5, 400	2016-01-30	715	Lipvoc
Harpia	16	5, 400	2016-01-30	715	Myrmyo
Harpia	16	5, 400	2016-01-30	715	Pippip
Harpia	16	5, 400	2016-01-30	715	Psavir
Harpia	16	5, 400	2016-01-30	715	Ramtuc
Harpia	16	5, 400	2016-01-30	715	Terery
Harpia	16	5, 400	2016-01-30	715	Thamur
Harpia	16	5, 400	2016-01-30	715	Tyrsto
Harpia	16	5, 400	2016-01-30	715	Unk
Harpia	16	5, 400	2016-01-30	730	Cammel
Harpia	16	5, 400	2016-01-30	730	Camrub
Harpia	16	5, 400	2016-01-30	730	Capnig
Harpia	16	5, 400	2016-01-30	730	Celgra
Harpia	16	5, 400	2016-01-30	730	Cercin
Harpia	16	5, 400	2016-01-30	730	Colplu
Harpia	16	5, 400	2016-01-30	730	Forcol
Harpia	16	5, 400	2016-01-30	730	Galalb
Harpia	16	5, 400	2016-01-30	730	Hylpoe
Harpia	16	5, 400	2016-01-30	730	Liotho
Harpia	16	5, 400	2016-01-30	730	Myrcam
Harpia	16	5, 400	2016-01-30	730	Pippip
Harpia	16	5, 400	2016-01-30	730	Psavir
Harpia	16	5, 400	2016-01-30	730	Ramtuc
Harpia	16	5, 400	2016-01-30	730	Ramvit
Harpia	16	5, 400	2016-01-30	730	Terery
Harpia	16	5, 400	2016-01-30	730	Thamur
Harpia	16	5, 400	2016-01-30	730	Tyrsto
Harpia	16	5, 400	2016-01-30	730	Unk
Harpia	16	5, 400	2016-01-30	745	Amafar
Harpia	16	5, 400	2016-01-30	745	Camrub
Harpia	16	5, 400	2016-01-30	745	Capnig
Harpia	16	5, 400	2016-01-30	745	Celgra
Harpia	16	5, 400	2016-01-30	745	Cercin
Harpia	16	5, 400	2016-01-30	745	Colplu
Harpia	16	5, 400	2016-01-30	745	Forcol
Harpia	16	5, 400	2016-01-30	745	Galalb
Harpia	16	5, 400	2016-01-30	745	Glyspi
Harpia	16	5, 400	2016-01-30	745	Henleu
Harpia	16	5, 400	2016-01-30	745	Hylpoe
Harpia	16	5, 400	2016-01-30	745	Liotho
Harpia	16	5, 400	2016-01-30	745	Lopvit
Harpia	16	5, 400	2016-01-30	745	Piomel
Harpia	16	5, 400	2016-01-30	745	Ramtuc
Harpia	16	5, 400	2016-01-30	745	Thamur
Harpia	16	5, 400	2016-01-30	745	Thrcor
Harpia	16	5, 400	2016-01-30	745	Troruf
Harpia	16	5, 400	2016-01-30	745	Tyrsto
Harpia	16	5, 400	2016-01-30	745	Unk
Harpia	16	5, 400	2016-01-30	800	Cammel
Harpia	16	5, 400	2016-01-30	800	Capnig
Harpia	16	5, 400	2016-01-30	800	Celele
Harpia	16	5, 400	2016-01-30	800	Celgra
Harpia	16	5, 400	2016-01-30	800	Cymlin
Harpia	16	5, 400	2016-01-30	800	Forcol
Harpia	16	5, 400	2016-01-30	800	Henleu
Harpia	16	5, 400	2016-01-30	800	Liotho
Harpia	16	5, 400	2016-01-30	800	Lopvit
Harpia	16	5, 400	2016-01-30	800	Piomel
Harpia	16	5, 400	2016-01-30	800	Ramtuc
Harpia	16	5, 400	2016-01-30	800	Trovir
Harpia	16	5, 400	2016-01-30	800	Tyrsto
Harpia	16	5, 400	2016-01-30	800	Unk
Harpia	16	7, 400	2016-01-30	545	Barmar
Harpia	16	7, 400	2016-01-30	545	Micgil
Harpia	16	7, 400	2016-01-30	600	Barmar
Harpia	16	7, 400	2016-01-30	600	Camtur
Harpia	16	7, 400	2016-01-30	600	Celele
Harpia	16	7, 400	2016-01-30	600	Cercin
Harpia	16	7, 400	2016-01-30	600	Denruf
Harpia	16	7, 400	2016-01-30	600	Glyspi
Harpia	16	7, 400	2016-01-30	600	Lipvoc
Harpia	16	7, 400	2016-01-30	600	Micgil
Harpia	16	7, 400	2016-01-30	600	Ramtuc
Harpia	16	7, 400	2016-01-30	600	Thaard
Harpia	16	7, 400	2016-01-30	600	Thamur
Harpia	16	7, 400	2016-01-30	600	Tingut
Harpia	16	7, 400	2016-01-30	600	Tyrsto
Harpia	16	7, 400	2016-01-30	600	Unk
Harpia	16	7, 400	2016-01-30	600	Unk
Harpia	16	7, 400	2016-01-30	600	Xipgut
Harpia	16	7, 400	2016-01-30	615	Capnig
Harpia	16	7, 400	2016-01-30	615	Celgra
Harpia	16	7, 400	2016-01-30	615	Cercin
Harpia	16	7, 400	2016-01-30	615	Colplu
Harpia	16	7, 400	2016-01-30	615	Liotho
Harpia	16	7, 400	2016-01-30	615	Lipvoc
Harpia	16	7, 400	2016-01-30	615	Lopvit
Harpia	16	7, 400	2016-01-30	615	Ramtuc
Harpia	16	7, 400	2016-01-30	615	Ramvit
Harpia	16	7, 400	2016-01-30	615	Terery
Harpia	16	7, 400	2016-01-30	615	Thamur
Harpia	16	7, 400	2016-01-30	615	Tingut
Harpia	16	7, 400	2016-01-30	615	Tyrsto
Harpia	16	7, 400	2016-01-30	615	Unk
Harpia	16	7, 400	2016-01-30	615	Xipgut
Harpia	16	7, 400	2016-01-30	630	Camrub
Harpia	16	7, 400	2016-01-30	630	Celele
Harpia	16	7, 400	2016-01-30	630	Celgra
Harpia	16	7, 400	2016-01-30	630	Cercin
Harpia	16	7, 400	2016-01-30	630	Colplu
Harpia	16	7, 400	2016-01-30	630	Hemzos
Harpia	16	7, 400	2016-01-30	630	Liotho
Harpia	16	7, 400	2016-01-30	630	Lipvoc
Harpia	16	7, 400	2016-01-30	630	Lopvit
Harpia	16	7, 400	2016-01-30	630	Piomel
Harpia	16	7, 400	2016-01-30	630	Psavir
Harpia	16	7, 400	2016-01-30	630	Quepur
Harpia	16	7, 400	2016-01-30	630	Ramtuc
Harpia	16	7, 400	2016-01-30	630	Thamur
Harpia	16	7, 400	2016-01-30	630	Tingut
Harpia	16	7, 400	2016-01-30	630	Trovir
Harpia	16	7, 400	2016-01-30	630	Tyrsto
Harpia	16	7, 400	2016-01-30	630	Unk
Harpia	16	7, 400	2016-01-30	630	Unk
Harpia	16	7, 400	2016-01-30	630	Unk
Harpia	16	7, 400	2016-01-30	645	Camrub
Harpia	16	7, 400	2016-01-30	645	Capnig
Harpia	16	7, 400	2016-01-30	645	Cercin
Harpia	16	7, 400	2016-01-30	645	Clyose
Harpia	16	7, 400	2016-01-30	645	Colplu
Harpia	16	7, 400	2016-01-30	645	Hypcan
Harpia	16	7, 400	2016-01-30	645	Liotho
Harpia	16	7, 400	2016-01-30	645	Lopvit
Harpia	16	7, 400	2016-01-30	645	Macreg
Harpia	16	7, 400	2016-01-30	645	Myrbra
Harpia	16	7, 400	2016-01-30	645	Nunbru
Harpia	16	7, 400	2016-01-30	645	Pipery
Harpia	16	7, 400	2016-01-30	645	Quepur
Harpia	16	7, 400	2016-01-30	645	Thamur
Harpia	16	7, 400	2016-01-30	645	Thasch
Harpia	16	7, 400	2016-01-30	645	Thrcor
Harpia	16	7, 400	2016-01-30	645	Tyrsto
Harpia	16	7, 400	2016-01-30	700	Camrub
Harpia	16	7, 400	2016-01-30	700	Capnig
Harpia	16	7, 400	2016-01-30	700	Cercin
Harpia	16	7, 400	2016-01-30	700	Clyose
Harpia	16	7, 400	2016-01-30	700	Colplu
Harpia	16	7, 400	2016-01-30	700	Cyacya
Harpia	16	7, 400	2016-01-30	700	Liotho
Harpia	16	7, 400	2016-01-30	700	Lipvoc
Harpia	16	7, 400	2016-01-30	700	Lopvit
Harpia	16	7, 400	2016-01-30	700	Myrbra
Harpia	16	7, 400	2016-01-30	700	Pipery
Harpia	16	7, 400	2016-01-30	700	Quepur
Harpia	16	7, 400	2016-01-30	700	Thamur
Harpia	16	7, 400	2016-01-30	700	Tyrsto
Harpia	16	7, 400	2016-01-30	715	Camrub
Harpia	16	7, 400	2016-01-30	715	Capnig
Harpia	16	7, 400	2016-01-30	715	Cercin
Harpia	16	7, 400	2016-01-30	715	Colplu
Harpia	16	7, 400	2016-01-30	715	Cyacya
Harpia	16	7, 400	2016-01-30	715	Cymlin
Harpia	16	7, 400	2016-01-30	715	Lipvoc
Harpia	16	7, 400	2016-01-30	715	Nunbru
Harpia	16	7, 400	2016-01-30	715	Pipery
Harpia	16	7, 400	2016-01-30	715	Quepur
Harpia	16	7, 400	2016-01-30	715	Ramtuc
Harpia	16	7, 400	2016-01-30	715	Trovir
Harpia	16	7, 400	2016-01-30	715	Tyrsto
Harpia	16	7, 400	2016-01-30	730	Cammel
Harpia	16	7, 400	2016-01-30	730	Camrub
Harpia	16	7, 400	2016-01-30	730	Capnig
Harpia	16	7, 400	2016-01-30	730	Cercin
Harpia	16	7, 400	2016-01-30	730	Colplu
Harpia	16	7, 400	2016-01-30	730	Cyacya
Harpia	16	7, 400	2016-01-30	730	Geomon
Harpia	16	7, 400	2016-01-30	730	Jacaur
Harpia	16	7, 400	2016-01-30	730	Liotho
Harpia	16	7, 400	2016-01-30	730	Lopvit
Harpia	16	7, 400	2016-01-30	730	Micmar
Harpia	16	7, 400	2016-01-30	730	Myrbra
Harpia	16	7, 400	2016-01-30	730	Pipery
Harpia	16	7, 400	2016-01-30	730	Psadec
Harpia	16	7, 400	2016-01-30	730	Ramtuc
Harpia	16	7, 400	2016-01-30	730	Ramvit
Harpia	16	7, 400	2016-01-30	730	Thamur
Harpia	16	7, 400	2016-01-30	730	Troruf
Harpia	16	7, 400	2016-01-30	730	Tyrsto
Harpia	16	7, 400	2016-01-30	745	Brocya
Harpia	16	7, 400	2016-01-30	745	Camrub
Harpia	16	7, 400	2016-01-30	745	Capnig
Harpia	16	7, 400	2016-01-30	745	Cercin
Harpia	16	7, 400	2016-01-30	745	Colplu
Harpia	16	7, 400	2016-01-30	745	Cyacya
Harpia	16	7, 400	2016-01-30	745	Geomon
Harpia	16	7, 400	2016-01-30	745	Liotho
Harpia	16	7, 400	2016-01-30	745	Lipvoc
Harpia	16	7, 400	2016-01-30	745	Micmar
Harpia	16	7, 400	2016-01-30	745	Phlery
Harpia	16	7, 400	2016-01-30	745	Pipery
Harpia	16	7, 400	2016-01-30	745	Thamur
Harpia	16	7, 400	2016-01-30	745	Troruf
Harpia	16	7, 400	2016-01-30	745	Tyrsto
Harpia	16	7, 400	2016-01-30	800	Cammel
Harpia	16	7, 400	2016-01-30	800	Cercin
Harpia	16	7, 400	2016-01-30	800	Colplu
Harpia	16	7, 400	2016-01-30	800	Geomon
Harpia	16	7, 400	2016-01-30	800	Pipery
Harpia	16	7, 400	2016-01-30	800	Pteaza
Harpia	16	7, 400	2016-01-30	800	Ramtuc
Harpia	16	7, 400	2016-01-30	800	Troruf
Harpia	16	7, 400	2016-01-30	800	Trovir
Harpia	16	7, 400	2016-01-30	800	Tyrsto
Harpia	16	9, 400	2016-01-30	545	Jacaur
Harpia	16	9, 400	2016-01-30	545	Micgil
Harpia	16	9, 400	2016-01-30	600	Capnig
Harpia	16	9, 400	2016-01-30	600	Cercin
Harpia	16	9, 400	2016-01-30	600	Denruf
Harpia	16	9, 400	2016-01-30	600	Henleu
Harpia	16	9, 400	2016-01-30	600	Hyphyp
Harpia	16	9, 400	2016-01-30	600	Jacaur
Harpia	16	9, 400	2016-01-30	600	Lipvoc
Harpia	16	9, 400	2016-01-30	600	Pipery
Harpia	16	9, 400	2016-01-30	600	Tingut
Harpia	16	9, 400	2016-01-30	600	Tinmaj
Harpia	16	9, 400	2016-01-30	600	Unk
Harpia	16	9, 400	2016-01-30	600	Xipgut
Harpia	16	9, 400	2016-01-30	615	Capnig
Harpia	16	9, 400	2016-01-30	615	Hypcan
Harpia	16	9, 400	2016-01-30	615	Lipvoc
Harpia	16	9, 400	2016-01-30	615	Pipery
Harpia	16	9, 400	2016-01-30	615	Ramtuc
Harpia	16	9, 400	2016-01-30	615	Tingut
Harpia	16	9, 400	2016-01-30	630	Camrub
Harpia	16	9, 400	2016-01-30	630	Cercin
Harpia	16	9, 400	2016-01-30	630	Dencer
Harpia	16	9, 400	2016-01-30	630	Gymleu
Harpia	16	9, 400	2016-01-30	630	Hylnae
Harpia	16	9, 400	2016-01-30	630	Hylpoe
Harpia	16	9, 400	2016-01-30	630	Hyphyp
Harpia	16	9, 400	2016-01-30	630	Jacaur
Harpia	16	9, 400	2016-01-30	630	Lipvoc
Harpia	16	9, 400	2016-01-30	630	Myraxi
Harpia	16	9, 400	2016-01-30	630	Myrhau
Harpia	16	9, 400	2016-01-30	630	Pipery
Harpia	16	9, 400	2016-01-30	630	Ramtuc
Harpia	16	9, 400	2016-01-30	630	Thamur
Harpia	16	9, 400	2016-01-30	630	Tingut
Harpia	16	9, 400	2016-01-30	630	Xipgut
Harpia	16	9, 400	2016-01-30	645	Camrub
Harpia	16	9, 400	2016-01-30	645	Camtur
Harpia	16	9, 400	2016-01-30	645	Capnig
Harpia	16	9, 400	2016-01-30	645	Cercin
Harpia	16	9, 400	2016-01-30	645	Glyspi
Harpia	16	9, 400	2016-01-30	645	Hylpoe
Harpia	16	9, 400	2016-01-30	645	Lipvoc
Harpia	16	9, 400	2016-01-30	645	Myraxi
Harpia	16	9, 400	2016-01-30	645	Pipery
Harpia	16	9, 400	2016-01-30	645	Thamur
Harpia	16	9, 400	2016-01-30	645	Tingut
Harpia	16	9, 400	2016-01-30	645	Unk
Harpia	16	9, 400	2016-01-30	700	Cercin
Harpia	16	9, 400	2016-01-30	700	Eupruf
Harpia	16	9, 400	2016-01-30	700	Hylpoe
Harpia	16	9, 400	2016-01-30	700	Lipvoc
Harpia	16	9, 400	2016-01-30	700	Pipery
Harpia	16	9, 400	2016-01-30	700	Tingut
Harpia	16	9, 400	2016-01-30	700	Unk
Harpia	16	9, 400	2016-01-30	715	Eupxan
Harpia	16	9, 400	2016-01-30	715	Hyloch
Harpia	16	9, 400	2016-01-30	715	Hylpoe
Harpia	16	9, 400	2016-01-30	715	Hyphyp
Harpia	16	9, 400	2016-01-30	715	Jacaur
Harpia	16	9, 400	2016-01-30	715	Myraxi
Harpia	16	9, 400	2016-01-30	715	Myrlon
Harpia	16	9, 400	2016-01-30	715	Pipery
Harpia	16	9, 400	2016-01-30	715	Psavir
Harpia	16	9, 400	2016-01-30	715	Quepur
Harpia	16	9, 400	2016-01-30	715	Tingut
Harpia	16	9, 400	2016-01-30	715	Trovir
Harpia	16	9, 400	2016-01-30	730	Cammel
Harpia	16	9, 400	2016-01-30	730	Camrub
Harpia	16	9, 400	2016-01-30	730	Hyloch
Harpia	16	9, 400	2016-01-30	730	Hylpoe
Harpia	16	9, 400	2016-01-30	730	Lipvoc
Harpia	16	9, 400	2016-01-30	730	Myitub
Harpia	16	9, 400	2016-01-30	730	Myraxi
Harpia	16	9, 400	2016-01-30	730	Myrlon
Harpia	16	9, 400	2016-01-30	730	Pipery
Harpia	16	9, 400	2016-01-30	730	Ramtuc
Harpia	16	9, 400	2016-01-30	730	Ramvit
Harpia	16	9, 400	2016-01-30	730	Thamur
Harpia	16	9, 400	2016-01-30	730	Tingut
Harpia	16	9, 400	2016-01-30	730	Tromel
Harpia	16	9, 400	2016-01-30	730	Trovir
Harpia	16	9, 400	2016-01-30	730	Unk
Harpia	16	9, 400	2016-01-30	745	Brocya
Harpia	16	9, 400	2016-01-30	745	Camrub
Harpia	16	9, 400	2016-01-30	745	Cercin
Harpia	16	9, 400	2016-01-30	745	Colplu
Harpia	16	9, 400	2016-01-30	745	Hylpoe
Harpia	16	9, 400	2016-01-30	745	Hyphyp
Harpia	16	9, 400	2016-01-30	745	Lipvoc
Harpia	16	9, 400	2016-01-30	745	Myraxi
Harpia	16	9, 400	2016-01-30	745	Pipery
Harpia	16	9, 400	2016-01-30	745	Thamur
Harpia	16	9, 400	2016-01-30	745	Tingut
Harpia	16	9, 400	2016-01-30	745	Trovio
Harpia	16	9, 400	2016-01-30	745	Unk
Harpia	16	9, 400	2016-01-30	800	Amafar
Harpia	16	9, 400	2016-01-30	800	Cercin
Harpia	16	9, 400	2016-01-30	800	Hylpoe
Harpia	16	9, 400	2016-01-30	800	Lipvoc
Harpia	16	9, 400	2016-01-30	800	Macreg
Harpia	16	9, 400	2016-01-30	800	Monmor
Harpia	16	9, 400	2016-01-30	800	Myraxi
Harpia	16	9, 400	2016-01-30	800	Pteaza
Harpia	16	9, 400	2016-01-30	800	Ramtuc
Harpia	16	9, 400	2016-01-30	800	Tingut
Harpia	16	9, 400	2016-01-30	800	Trovir
Harpia	16	9, 400	2016-01-30	800	Tyrsto
Harpia	16	9, 400	2016-01-30	800	Unk
Harpia	16	10, 600	2016-02-01	545	Barmar
Harpia	16	10, 600	2016-02-01	545	Cryvar
Harpia	16	10, 600	2016-02-01	545	Micgil
Harpia	16	10, 600	2016-02-01	545	Otuwat
Harpia	16	10, 600	2016-02-01	545	Xipgut
Harpia	16	10, 600	2016-02-01	600	Cryvar
Harpia	16	10, 600	2016-02-01	600	Cymlin
Harpia	16	10, 600	2016-02-01	600	Geomon
Harpia	16	10, 600	2016-02-01	600	Hylpoe
Harpia	16	10, 600	2016-02-01	600	Hylsub
Harpia	16	10, 600	2016-02-01	600	Hypcan
Harpia	16	10, 600	2016-02-01	600	Liotho
Harpia	16	10, 600	2016-02-01	600	Lipvoc
Harpia	16	10, 600	2016-02-01	600	Pygste
Harpia	16	10, 600	2016-02-01	600	Unk
Harpia	16	10, 600	2016-02-01	600	Unk
Harpia	16	10, 600	2016-02-01	600	Xipgut
Harpia	16	10, 600	2016-02-01	615	Arasev
Harpia	16	10, 600	2016-02-01	615	Camrub
Harpia	16	10, 600	2016-02-01	615	Celgra
Harpia	16	10, 600	2016-02-01	615	Cercin
Harpia	16	10, 600	2016-02-01	615	Cryvar
Harpia	16	10, 600	2016-02-01	615	Geomon
Harpia	16	10, 600	2016-02-01	615	Hylhyp
Harpia	16	10, 600	2016-02-01	615	Hypcan
Harpia	16	10, 600	2016-02-01	615	Liotho
Harpia	16	10, 600	2016-02-01	615	Myitub
Harpia	16	10, 600	2016-02-01	615	Ramtuc
Harpia	16	10, 600	2016-02-01	615	Tolass
Harpia	16	10, 600	2016-02-01	615	Turalb
Harpia	16	10, 600	2016-02-01	615	Unk
Harpia	16	10, 600	2016-02-01	615	Unk
Harpia	16	10, 600	2016-02-01	615	Xipgut
Harpia	16	10, 600	2016-02-01	630	Amafar
Harpia	16	10, 600	2016-02-01	630	Cammel
Harpia	16	10, 600	2016-02-01	630	Camrub
Harpia	16	10, 600	2016-02-01	630	Cymlin
[truncated: 1,300 more rows]

## Sheet: H2017
Plot	Year	Point	Date	Time	Species
Harpia	17	2, 600	2017-02-20	545	Abucum
Harpia	17	3, 400	2017-02-19	545	Abucum
Harpia	17	3, 800	2017-02-23	545	Abucum
Harpia	17	7, -50	2017-02-12	545	Abucum
Harpia	17	9, -50	2017-02-12	545	Abucum
Harpia	17	10, 200	2017-02-15	545	Abucum
Harpia	17	1, -50	2017-02-12	600	Amafar
Harpia	17	1, -50	2017-02-12	800	Amafar
Harpia	17	1, 400	2017-02-17	645	Amafar
Harpia	17	1, 800	2017-02-23	745	Amafar
Harpia	17	1, 800	2017-02-23	800	Amafar
Harpia	17	2, 200	2017-02-15	600	Amafar
Harpia	17	2, 200	2017-02-15	615	Amafar
Harpia	17	2, 200	2017-02-15	630	Amafar
Harpia	17	2, 200	2017-02-15	645	Amafar
Harpia	17	2, 200	2017-02-15	700	Amafar
Harpia	17	2, 200	2017-02-15	730	Amafar
Harpia	17	2, 200	2017-02-15	745	Amafar
Harpia	17	2, 600	2017-02-20	745	Amafar
Harpia	17	3, -50	2017-02-12	600	Amafar
Harpia	17	3, -50	2017-02-12	630	Amafar
Harpia	17	3, -50	2017-02-12	645	Amafar
Harpia	17	3, -50	2017-02-12	800	Amafar
Harpia	17	3, 400	2017-02-19	600	Amafar
Harpia	17	3, 400	2017-02-19	700	Amafar
Harpia	17	3, 400	2017-02-19	715	Amafar
Harpia	17	3, 400	2017-02-19	730	Amafar
Harpia	17	3, 400	2017-02-19	800	Amafar
Harpia	17	3, 800	2017-02-24	730	Amafar
Harpia	17	3, 800	2017-02-24	745	Amafar
Harpia	17	3, 800	2017-02-24	800	Amafar
Harpia	17	4, 200	2017-02-15	615	Amafar
Harpia	17	4, 200	2017-02-15	645	Amafar
Harpia	17	4, 200	2017-02-15	700	Amafar
Harpia	17	4, 200	2017-02-15	715	Amafar
Harpia	17	4, 200	2017-02-15	730	Amafar
Harpia	17	4, 200	2017-02-15	745	Amafar
Harpia	17	4, 600	2017-02-20	630	Amafar
Harpia	17	4, 600	2017-02-20	730	Amafar
Harpia	17	4, 600	2017-02-20	745	Amafar
Harpia	17	4, 600	2017-02-20	800	Amafar
Harpia	17	5, -50	2017-02-12	600	Amafar
Harpia	17	5, -50	2017-02-12	800	Amafar
Harpia	17	5, 400	2017-02-19	600	Amafar
Harpia	17	5, 400	2017-02-19	615	Amafar
Harpia	17	5, 400	2017-02-19	700	Amafar
Harpia	17	5, 400	2017-02-19	715	Amafar
Harpia	17	5, 400	2017-02-19	730	Amafar
Harpia	17	5, 400	2017-02-19	800	Amafar
Harpia	17	5, 800	2017-02-24	615	Amafar
Harpia	17	5, 800	2017-02-24	630	Amafar
Harpia	17	5, 800	2017-02-24	715	Amafar
Harpia	17	5, 800	2017-02-24	730	Amafar
Harpia	17	6, 200	2017-02-15	600	Amafar
Harpia	17	6, 200	2017-02-15	615	Amafar
Harpia	17	6, 200	2017-02-15	630	Amafar
Harpia	17	6, 200	2017-02-15	645	Amafar
Harpia	17	6, 200	2017-02-15	700	Amafar
Harpia	17	6, 200	2017-02-15	715	Amafar
Harpia	17	6, 200	2017-02-15	730	Amafar
Harpia	17	6, 200	2017-02-15	745	Amafar
Harpia	17	6, 600	2017-02-20	715	Amafar
Harpia	17	6, 600	2017-02-20	730	Amafar
Harpia	17	7, -50	2017-02-12	600	Amafar
Harpia	17	7, -50	2017-02-12	715	Amafar
Harpia	17	7, -50	2017-02-12	745	Amafar
Harpia	17	7, -50	2017-02-12	800	Amafar
Harpia	17	7, 400	2017-02-19	600	Amafar
Harpia	17	7, 400	2017-02-19	615	Amafar
Harpia	17	7, 400	2017-02-19	630	Amafar
Harpia	17	7, 400	2017-02-19	715	Amafar
Harpia	17	7, 400	2017-02-19	730	Amafar
Harpia	17	7, 400	2017-02-19	745	Amafar
Harpia	17	7, 800	2017-02-23	700	Amafar
Harpia	17	8, 200	2017-02-15	600	Amafar
Harpia	17	8, 200	2017-02-15	615	Amafar
Harpia	17	8, 200	2017-02-15	700	Amafar
Harpia	17	8, 200	2017-02-15	715	Amafar
Harpia	17	8, 200	2017-02-15	745	Amafar
Harpia	17	8, 600	2017-02-20	715	Amafar
Harpia	17	8, 600	2017-02-20	730	Amafar
Harpia	17	8, 600	2017-02-20	800	Amafar
Harpia	17	9, -50	2017-02-12	630	Amafar
Harpia	17	9, -50	2017-02-12	645	Amafar
Harpia	17	9, -50	2017-02-12	700	Amafar
Harpia	17	9, 400	2017-02-19	600	Amafar
Harpia	17	9, 400	2017-02-19	615	Amafar
Harpia	17	9, 400	2017-02-19	630	Amafar
Harpia	17	9, 400	2017-02-19	645	Amafar
Harpia	17	9, 400	2017-02-19	730	Amafar
Harpia	17	9, 400	2017-02-19	730	Amafar
Harpia	17	9, 800	2017-02-23	700	Amafar
Harpia	17	9, 800	2017-02-23	715	Amafar
Harpia	17	10, 600	2017-02-20	615	Amafar
Harpia	17	10, 600	2017-02-20	730	Amafar
Harpia	17	10, 600	2017-02-20	745	Amafar
Harpia	17	10, 600	2017-02-20	800	Amafar
Harpia	17	7, -50	2017-02-12	600	Ancstr
Harpia	17	8, 600	2017-02-20	730	Ancstr
Harpia	17	9, 400	2017-02-19	600	Ancstr
Harpia	17	10, 600	2017-02-20	600	Ancstr
Harpia	17	10, 600	2017-02-20	615	Ancstr
Harpia	17	10, 600	2017-02-20	630	Ancstr
Harpia	17	10, 600	2017-02-20	645	Ancstr
Harpia	17	10, 600	2017-02-20	700	Ancstr
Harpia	17	5, 400	2017-02-19	745	Araara
Harpia	17	7, -50	2017-02-12	600	Araara
Harpia	17	1, 800	2017-02-23	700	Aramac
Harpia	17	1, 800	2017-02-23	800	Aramac
Harpia	17	2, 200	2017-02-15	715	Aramac
Harpia	17	2, 600	2017-02-20	600	Aramac
Harpia	17	2, 600	2017-02-20	745	Aramac
Harpia	17	3, 400	2017-02-19	615	Aramac
Harpia	17	5, 400	2017-02-19	615	Aramac
Harpia	17	7, 400	2017-02-19	745	Aramac
Harpia	17	9, -50	2017-02-12	730	Aramac
Harpia	17	9, 400	2017-02-19	745	Aramac
Harpia	17	9, -50	2017-02-12	715	Arasev
Harpia	17	10, 600	2017-02-20	715	Arasev
Harpia	17	1, -50	2017-02-12	615	Atispa
Harpia	17	1, -50	2017-02-12	630	Atispa
Harpia	17	1, -50	2017-02-12	645	Atispa
Harpia	17	1, -50	2017-02-12	700	Atispa
Harpia	17	1, -50	2017-02-12	715	Atispa
Harpia	17	1, -50	2017-02-12	730	Atispa
Harpia	17	1, -50	2017-02-12	800	Atispa
Harpia	17	3, -50	2017-02-12	615	Atispa
Harpia	17	3, -50	2017-02-12	630	Atispa
Harpia	17	3, -50	2017-02-12	645	Atispa
Harpia	17	3, -50	2017-02-12	700	Atispa
Harpia	17	3, -50	2017-02-12	715	Atispa
Harpia	17	3, -50	2017-02-12	730	Atispa
Harpia	17	4, 200	2017-02-15	645	Atispa
Harpia	17	4, 600	2017-02-20	630	Atispa
Harpia	17	4, 600	2017-02-20	645	Atispa
Harpia	17	4, 600	2017-02-20	700	Atispa
Harpia	17	5, -50	2017-02-12	615	Atispa
Harpia	17	5, -50	2017-02-12	630	Atispa
Harpia	17	5, -50	2017-02-12	645	Atispa
Harpia	17	5, -50	2017-02-12	700	Atispa
Harpia	17	5, -50	2017-02-12	715	Atispa
Harpia	17	5, -50	2017-02-12	730	Atispa
Harpia	17	5, 800	2017-02-23	600	Atispa
Harpia	17	5, 800	2017-02-24	615	Atispa
Harpia	17	5, 800	2017-02-24	630	Atispa
Harpia	17	5, 800	2017-02-24	645	Atispa
Harpia	17	5, 800	2017-02-24	700	Atispa
Harpia	17	5, 800	2017-02-24	715	Atispa
Harpia	17	5, 800	2017-02-24	730	Atispa
Harpia	17	5, 800	2017-02-24	745	Atispa
Harpia	17	6, 200	2017-02-15	700	Atispa
Harpia	17	6, 600	2017-02-20	600	Atispa
Harpia	17	6, 600	2017-02-20	615	Atispa
Harpia	17	6, 600	2017-02-20	630	Atispa
Harpia	17	6, 600	2017-02-20	645	Atispa
Harpia	17	6, 600	2017-02-20	700	Atispa
Harpia	17	7, -50	2017-02-12	630	Atispa
Harpia	17	7, -50	2017-02-12	645	Atispa
Harpia	17	7, -50	2017-02-12	700	Atispa
Harpia	17	7, -50	2017-02-12	715	Atispa
Harpia	17	7, -50	2017-02-12	730	Atispa
Harpia	17	7, 400	2017-02-19	600	Atispa
Harpia	17	7, 400	2017-02-19	615	Atispa
Harpia	17	7, 400	2017-02-19	645	Atispa
Harpia	17	7, 400	2017-02-19	700	Atispa
Harpia	17	7, 800	2017-02-23	600	Atispa
Harpia	17	7, 800	2017-02-23	615	Atispa
Harpia	17	7, 800	2017-02-23	630	Atispa
Harpia	17	7, 800	2017-02-23	645	Atispa
Harpia	17	7, 800	2017-02-23	700	Atispa
Harpia	17	7, 800	2017-02-23	715	Atispa
Harpia	17	7, 800	2017-02-23	730	Atispa
Harpia	17	7, 800	2017-02-23	745	Atispa
Harpia	17	7, 800	2017-02-23	800	Atispa
Harpia	17	8, 600	2017-02-20	600	Atispa
Harpia	17	8, 600	2017-02-20	615	Atispa
Harpia	17	8, 600	2017-02-20	630	Atispa
Harpia	17	8, 600	2017-02-20	645	Atispa
Harpia	17	8, 600	2017-02-20	700	Atispa
Harpia	17	8, 600	2017-02-20	715	Atispa
Harpia	17	8, 600	2017-02-20	730	Atispa
Harpia	17	8, 600	2017-02-20	745	Atispa
Harpia	17	9, 800	2017-02-23	600	Atispa
Harpia	17	9, 800	2017-02-23	615	Atispa
Harpia	17	9, 800	2017-02-23	630	Atispa
Harpia	17	9, 800	2017-02-23	645	Atispa
Harpia	17	9, 800	2017-02-23	700	Atispa
Harpia	17	9, 800	2017-02-23	715	Atispa
Harpia	17	9, 800	2017-02-23	730	Atispa
Harpia	17	9, 800	2017-02-23	745	Atispa
Harpia	17	10, 600	2017-02-20	600	Atispa
Harpia	17	10, 600	2017-02-20	630	Atispa
Harpia	17	10, 600	2017-02-20	645	Atispa
Harpia	17	10, 600	2017-02-20	700	Atispa
Harpia	17	10, 600	2017-02-20	715	Atispa
Harpia	17	10, 600	2017-02-20	730	Atispa
Harpia	17	10, 600	2017-02-20	745	Atispa
Harpia	17	10, 600	2017-02-20	745	Atispa
Harpia	17	1, 400	2017-02-19	600	Autinf
Harpia	17	2, 600	2017-02-20	600	Autinf
Harpia	17	2, 600	2017-02-20	615	Autinf
Harpia	17	2, 600	2017-02-20	715	Autinf
Harpia	17	3, -50	2017-02-12	600	Autinf
Harpia	17	3, -50	2017-02-12	700	Autinf
Harpia	17	3, 400	2017-02-19	600	Autinf
Harpia	17	3, 400	2017-02-19	615	Autinf
Harpia	17	3, 400	2017-02-19	630	Autinf
Harpia	17	3, 400	2017-02-19	700	Autinf
Harpia	17	5, -50	2017-02-12	630	Autinf
Harpia	17	1, -50	2017-02-12	600	Barmar
Harpia	17	1, -50	2017-02-12	630	Barmar
Harpia	17	1, -50	2017-02-12	645	Barmar
Harpia	17	1, 400	2017-02-17	630	Barmar
Harpia	17	1, 400	2017-02-17	645	Barmar
Harpia	17	1, 400	2017-02-17	715	Barmar
Harpia	17	1, 800	2017-02-23	730	Barmar
Harpia	17	1, 800	2017-02-23	745	Barmar
Harpia	17	1, 800	2017-02-23	800	Barmar
Harpia	17	2, 600	2017-02-20	545	Barmar
Harpia	17	2, 600	2017-02-20	615	Barmar
Harpia	17	2, 600	2017-02-20	630	Barmar
Harpia	17	2, 600	2017-02-20	645	Barmar
Harpia	17	2, 600	2017-02-20	700	Barmar
Harpia	17	3, 800	2017-02-24	730	Barmar
Harpia	17	5, 800	2017-02-24	700	Barmar
Harpia	17	5, 800	2017-02-24	715	Barmar
Harpia	17	5, 800	2017-02-24	730	Barmar
Harpia	17	6, 600	2017-02-20	630	Barmar
Harpia	17	6, 600	2017-02-20	645	Barmar
Harpia	17	7, 400	2017-02-19	615	Barmar
Harpia	17	7, 400	2017-02-19	700	Barmar
Harpia	17	7, 400	2017-02-19	715	Barmar
Harpia	17	7, 400	2017-02-19	730	Barmar
Harpia	17	7, 400	2017-02-19	745	Barmar
Harpia	17	7, 400	2017-02-19	800	Barmar
Harpia	17	7, 800	2017-02-23	545	Barmar
Harpia	17	7, 800	2017-02-23	600	Barmar
Harpia	17	7, 800	2017-02-23	615	Barmar
Harpia	17	7, 800	2017-02-23	630	Barmar
Harpia	17	7, 800	2017-02-23	645	Barmar
Harpia	17	8, 600	2017-02-20	545	Barmar
Harpia	17	8, 600	2017-02-20	600	Barmar
Harpia	17	8, 600	2017-02-20	645	Barmar
Harpia	17	10, 600	2017-02-20	630	Barmar
Harpia	17	10, 600	2017-02-20	645	Barmar
Harpia	17	10, 600	2017-02-20	700	Barmar
Harpia	17	1, -50	2017-02-12	645	Brocya
Harpia	17	1, -50	2017-02-12	800	Brocya
Harpia	17	1, 800	2017-02-23	700	Brocya
Harpia	17	1, 800	2017-02-23	715	Brocya
Harpia	17	1, 800	2017-02-23	730	Brocya
Harpia	17	2, 200	2017-02-15	645	Brocya
Harpia	17	2, 200	2017-02-15	700	Brocya
Harpia	17	2, 200	2017-02-15	730	Brocya
Harpia	17	2, 200	2017-02-15	800	Brocya
Harpia	17	2, 600	2017-02-20	630	Brocya
Harpia	17	2, 600	2017-02-20	700	Brocya
Harpia	17	2, 600	2017-02-20	715	Brocya
Harpia	17	2, 600	2017-02-20	800	Brocya
Harpia	17	3, -50	2017-02-12	730	Brocya
Harpia	17	3, 400	2017-02-19	715	Brocya
Harpia	17	3, 400	2017-02-19	730	Brocya
Harpia	17	3, 400	2017-02-19	745	Brocya
Harpia	17	3, 800	2017-02-23	700	Brocya
Harpia	17	3, 800	2017-02-24	745	Brocya
Harpia	17	4, 200	2017-02-15	645	Brocya
Harpia	17	4, 200	2017-02-15	700	Brocya
Harpia	17	4, 200	2017-02-15	800	Brocya
Harpia	17	4, 600	2017-02-20	615	Brocya
Harpia	17	4, 600	2017-02-20	630	Brocya
Harpia	17	4, 600	2017-02-20	700	Brocya
Harpia	17	4, 600	2017-02-20	715	Brocya
Harpia	17	4, 600	2017-02-20	800	Brocya
Harpia	17	5, -50	2017-02-12	730	Brocya
Harpia	17	5, 400	2017-02-19	715	Brocya
Harpia	17	5, 400	2017-02-19	800	Brocya
Harpia	17	5, 800	2017-02-24	630	Brocya
Harpia	17	5, 800	2017-02-24	645	Brocya
Harpia	17	5, 800	2017-02-24	700	Brocya
Harpia	17	5, 800	2017-02-24	715	Brocya
Harpia	17	5, 800	2017-02-24	745	Brocya
Harpia	17	5, 800	2017-02-24	800	Brocya
Harpia	17	6, 200	2017-02-15	615	Brocya
Harpia	17	6, 200	2017-02-15	630	Brocya
Harpia	17	6, 200	2017-02-15	800	Brocya
Harpia	17	6, 600	2017-02-20	615	Brocya
Harpia	17	6, 600	2017-02-20	630	Brocya
Harpia	17	6, 600	2017-02-20	645	Brocya
Harpia	17	6, 600	2017-02-20	700	Brocya
Harpia	17	6, 600	2017-02-20	800	Brocya
Harpia	17	7, -50	2017-02-12	800	Brocya
Harpia	17	7, 400	2017-02-19	715	Brocya
Harpia	17	7, 400	2017-02-19	745	Brocya
Harpia	17	7, 400	2017-02-19	800	Brocya
Harpia	17	7, 800	2017-02-23	700	Brocya
Harpia	17	7, 800	2017-02-23	745	Brocya
Harpia	17	7, 800	2017-02-23	800	Brocya
Harpia	17	8, 200	2017-02-15	800	Brocya
Harpia	17	8, 600	2017-02-20	615	Brocya
Harpia	17	8, 600	2017-02-20	630	Brocya
Harpia	17	8, 600	2017-02-20	745	Brocya
Harpia	17	9, -50	2017-02-12	715	Brocya
Harpia	17	9, -50	2017-02-12	730	Brocya
Harpia	17	9, -50	2017-02-12	800	Brocya
Harpia	17	9, 400	2017-02-19	715	Brocya
Harpia	17	9, 400	2017-02-19	745	Brocya
Harpia	17	9, 400	2017-02-19	800	Brocya
Harpia	17	9, 800	2017-02-23	630	Brocya
Harpia	17	9, 800	2017-02-23	700	Brocya
Harpia	17	9, 800	2017-02-23	800	Brocya
Harpia	17	10, 200	2017-02-15	800	Brocya
Harpia	17	10, 600	2017-02-20	630	Brocya
Harpia	17	10, 600	2017-02-20	645	Brocya
Harpia	17	10, 600	2017-02-20	700	Brocya
Harpia	17	10, 600	2017-02-20	715	Brocya
Harpia	17	10, 600	2017-02-20	745	Brocya
Harpia	17	10, 600	2017-02-20	800	Brocya
Harpia	17	3, -50	2017-02-12	545	Buccap
Harpia	17	5, 800	2017-02-23	545	Buccap
Harpia	17	9, -50	2017-02-12	545	Buccap
Harpia	17	9, -50	2017-02-12	600	Buccap
Harpia	17	9, 400	2017-02-19	600	Buccap
Harpia	17	4, 200	2017-02-15	730	Caccel
Harpia	17	4, 200	2017-02-15	745	Caccel
Harpia	17	5, 800	2017-02-24	715	Caccel
Harpia	17	6, 200	2017-02-15	745	Caccel
Harpia	17	8, 600	2017-02-20	645	Caccel
Harpia	17	9, 400	2017-02-19	600	Caccel
Harpia	17	1, -50	2017-02-12	615	Cammel
Harpia	17	1, -50	2017-02-12	630	Cammel
Harpia	17	1, -50	2017-02-12	645	Cammel
Harpia	17	1, -50	2017-02-12	800	Cammel
Harpia	17	1, -50	2017-02-12	800	Cammel
Harpia	17	1, 400	2017-02-19	600	Cammel
Harpia	17	1, 400	2017-02-17	630	Cammel
Harpia	17	1, 400	2017-02-17	645	Cammel
Harpia	17	1, 400	2017-02-17	700	Cammel
Harpia	17	1, 400	2017-02-17	715	Cammel
Harpia	17	1, 400	2017-02-19	730	Cammel
Harpia	17	1, 400	2017-02-19	745	Cammel
Harpia	17	1, 400	2017-02-19	800	Cammel
Harpia	17	1, 800	2017-02-23	730	Cammel
Harpia	17	1, 800	2017-02-23	800	Cammel
Harpia	17	2, 200	2017-02-15	615	Cammel
Harpia	17	2, 200	2017-02-15	645	Cammel
Harpia	17	2, 200	2017-02-15	700	Cammel
Harpia	17	2, 200	2017-02-15	715	Cammel
Harpia	17	2, 200	2017-02-15	730	Cammel
Harpia	17	2, 200	2017-02-15	800	Cammel
Harpia	17	2, 600	2017-02-20	615	Cammel
Harpia	17	2, 600	2017-02-20	645	Cammel
Harpia	17	2, 600	2017-02-20	715	Cammel
Harpia	17	2, 600	2017-02-20	730	Cammel
Harpia	17	2, 600	2017-02-20	745	Cammel
Harpia	17	2, 600	2017-02-20	800	Cammel
Harpia	17	3, -50	2017-02-12	630	Cammel
Harpia	17	3, -50	2017-02-12	645	Cammel
Harpia	17	3, -50	2017-02-12	800	Cammel
Harpia	17	3, 400	2017-02-19	615	Cammel
Harpia	17	3, 400	2017-02-19	630	Cammel
Harpia	17	4, 200	2017-02-15	700	Cammel
Harpia	17	4, 200	2017-02-15	715	Cammel
Harpia	17	4, 600	2017-02-20	715	Cammel
Harpia	17	4, 600	2017-02-20	730	Cammel
Harpia	17	4, 600	2017-02-20	800	Cammel
Harpia	17	5, -50	2017-02-12	715	Cammel
Harpia	17	6, 600	2017-02-20	800	Cammel
Harpia	17	7, -50	2017-02-12	630	Cammel
Harpia	17	7, -50	2017-02-12	645	Cammel
Harpia	17	8, 600	2017-02-20	545	Cammel
Harpia	17	9, -50	2017-02-12	630	Cammel
Harpia	17	9, -50	2017-02-12	730	Cammel
Harpia	17	3, 400	2017-02-19	745	Camrub
Harpia	17	3, 400	2017-02-19	800	Camrub
Harpia	17	7, 400	2017-02-19	730	Camrub
Harpia	17	7, 400	2017-02-19	745	Camrub
Harpia	17	7, 400	2017-02-19	800	Camrub
Harpia	17	8, 200	2017-02-15	645	Camrub
Harpia	17	9, 400	2017-02-19	730	Camrub
Harpia	17	9, 400	2017-02-19	745	Camrub
Harpia	17	9, 400	2017-02-19	800	Camrub
Harpia	17	10, 200	2017-02-15	630	Camrub
Harpia	17	10, 200	2017-02-15	645	Camrub
Harpia	17	10, 200	2017-02-15	730	Camrub
Harpia	17	5, 400	2017-02-19	645	Camtur
Harpia	17	5, 400	2017-02-19	730	Camtur
Harpia	17	7, 400	2017-02-19	700	Camtur
Harpia	17	1, -50	2017-02-12	630	Capnig
Harpia	17	1, -50	2017-02-12	645	Capnig
Harpia	17	1, -50	2017-02-12	715	Capnig
Harpia	17	1, -50	2017-02-12	730	Capnig
Harpia	17	1, -50	2017-02-12	745	Capnig
Harpia	17	1, -50	2017-02-12	800	Capnig
Harpia	17	1, 400	2017-02-17	715	Capnig
Harpia	17	1, 400	2017-02-19	730	Capnig
Harpia	17	1, 400	2017-02-19	745	Capnig
Harpia	17	2, 200	2017-02-15	745	Capnig
Harpia	17	2, 600	2017-02-20	730	Capnig
Harpia	17	2, 600	2017-02-20	745	Capnig
Harpia	17	3, -50	2017-02-12	630	Capnig
Harpia	17	3, -50	2017-02-12	645	Capnig
Harpia	17	3, -50	2017-02-12	700	Capnig
Harpia	17	3, -50	2017-02-12	745	Capnig
Harpia	17	3, 800	2017-02-23	630	Capnig
Harpia	17	4, 600	2017-02-20	630	Capnig
Harpia	17	4, 600	2017-02-20	700	Capnig
Harpia	17	4, 600	2017-02-20	730	Capnig
Harpia	17	4, 600	2017-02-20	745	Capnig
Harpia	17	5, 400	2017-02-19	645	Capnig
Harpia	17	5, 400	2017-02-19	700	Capnig
Harpia	17	5, 400	2017-02-19	745	Capnig
Harpia	17	5, 400	2017-02-19	800	Capnig
Harpia	17	5, 800	2017-02-24	700	Capnig
Harpia	17	6, 600	2017-02-20	645	Capnig
Harpia	17	6, 600	2017-02-20	730	Capnig
Harpia	17	7, -50	2017-02-12	700	Capnig
Harpia	17	7, -50	2017-02-12	715	Capnig
Harpia	17	7, -50	2017-02-12	745	Capnig
Harpia	17	7, 400	2017-02-19	615	Capnig
Harpia	17	7, 400	2017-02-19	630	Capnig
Harpia	17	7, 400	2017-02-19	645	Capnig
Harpia	17	7, 400	2017-02-19	700	Capnig
Harpia	17	7, 400	2017-02-19	745	Capnig
Harpia	17	7, 400	2017-02-19	800	Capnig
Harpia	17	7, 800	2017-02-23	615	Capnig
Harpia	17	7, 800	2017-02-23	630	Capnig
Harpia	17	7, 800	2017-02-23	700	Capnig
Harpia	17	7, 800	2017-02-23	715	Capnig
Harpia	17	7, 800	2017-02-23	730	Capnig
Harpia	17	8, 200	2017-02-15	615	Capnig
Harpia	17	8, 200	2017-02-15	700	Capnig
Harpia	17	8, 200	2017-02-15	715	Capnig
Harpia	17	8, 200	2017-02-15	800	Capnig
Harpia	17	8, 600	2017-02-20	600	Capnig
Harpia	17	8, 600	2017-02-20	630	Capnig
Harpia	17	9, -50	2017-02-12	630	Capnig
Harpia	17	9, -50	2017-02-12	645	Capnig
Harpia	17	9, -50	2017-02-12	700	Capnig
Harpia	17	9, -50	2017-02-12	715	Capnig
Harpia	17	9, -50	2017-02-12	745	Capnig
Harpia	17	9, -50	2017-02-12	800	Capnig
Harpia	17	9, 400	2017-02-19	630	Capnig
Harpia	17	9, 400	2017-02-19	645	Capnig
Harpia	17	9, 800	2017-02-23	715	Capnig
Harpia	17	10, 200	2017-02-15	600	Capnig
Harpia	17	10, 200	2017-02-15	615	Capnig
Harpia	17	10, 200	2017-02-15	630	Capnig
Harpia	17	10, 200	2017-02-15	645	Capnig
Harpia	17	10, 200	2017-02-15	700	Capnig
Harpia	17	10, 200	2017-02-15	715	Capnig
Harpia	17	10, 200	2017-02-15	730	Capnig
Harpia	17	10, 200	2017-02-15	800	Capnig
Harpia	17	10, 600	2017-02-20	615	Capnig
Harpia	17	10, 600	2017-02-20	730	Capnig
Harpia	17	10, 600	2017-02-20	800	Capnig
Harpia	17	3, 800	2017-02-23	645	Celele
Harpia	17	7, -50	2017-02-12	645	Celele
Harpia	17	7, -50	2017-02-12	800	Celele
Harpia	17	7, 400	2017-02-19	600	Celele
Harpia	17	7, 400	2017-02-19	700	Celele
Harpia	17	10, 200	2017-02-15	715	Celele
Harpia	17	9, 400	2017-02-19	745	Celfla
Harpia	17	9, 400	2017-02-19	800	Celfla
Harpia	17	5, -50	2017-02-12	745	Celgra
Harpia	17	5, -50	2017-02-12	800	Celgra
Harpia	17	5, 400	2017-02-19	600	Celgra
Harpia	17	5, 400	2017-02-19	800	Celgra
Harpia	17	6, 200	2017-02-15	645	Celgra
Harpia	17	7, -50	2017-02-12	745	Celgra
Harpia	17	7, -50	2017-02-12	800	Celgra
Harpia	17	7, 400	2017-02-19	615	Celgra
Harpia	17	7, 400	2017-02-19	630	Celgra
Harpia	17	7, 400	2017-02-19	715	Celgra
Harpia	17	7, 400	2017-02-19	730	Celgra
Harpia	17	7, 400	2017-02-19	745	Celgra
Harpia	17	7, 400	2017-02-19	800	Celgra
Harpia	17	7, 800	2017-02-23	645	Celgra
Harpia	17	8, 600	2017-02-20	630	Celgra
Harpia	17	8, 600	2017-02-20	645	Celgra
Harpia	17	8, 600	2017-02-20	715	Celgra
Harpia	17	9, -50	2017-02-12	630	Celgra
Harpia	17	9, -50	2017-02-12	700	Celgra
Harpia	17	9, -50	2017-02-12	715	Celgra
Harpia	17	9, 400	2017-02-19	615	Celgra
Harpia	17	9, 400	2017-02-19	700	Celgra
Harpia	17	9, 400	2017-02-19	715	Celgra
Harpia	17	9, 400	2017-02-19	730	Celgra
Harpia	17	9, 400	2017-02-19	800	Celgra
Harpia	17	9, 800	2017-02-23	700	Celgra
Harpia	17	9, 800	2017-02-23	715	Celgra
Harpia	17	10, 200	2017-02-15	630	Celgra
Harpia	17	10, 600	2017-02-20	630	Celgra
Harpia	17	10, 600	2017-02-20	645	Celgra
Harpia	17	10, 600	2017-02-20	715	Celgra
Harpia	17	10, 600	2017-02-20	730	Celgra
Harpia	17	10, 600	2017-02-20	745	Celgra
Harpia	17	10, 600	2017-02-20	745	Celgra
Harpia	17	1, 400	2017-02-19	600	Cercin
Harpia	17	1, 400	2017-02-17	615	Cercin
Harpia	17	1, 400	2017-02-17	630	Cercin
Harpia	17	1, 400	2017-02-17	645	Cercin
Harpia	17	1, 400	2017-02-17	700	Cercin
Harpia	17	1, 400	2017-02-19	730	Cercin
Harpia	17	1, 400	2017-02-19	745	Cercin
Harpia	17	1, 400	2017-02-19	800	Cercin
Harpia	17	1, 800	2017-02-23	600	Cercin
Harpia	17	1, 800	2017-02-23	615	Cercin
Harpia	17	1, 800	2017-02-23	630	Cercin
Harpia	17	1, 800	2017-02-23	645	Cercin
Harpia	17	1, 800	2017-02-23	700	Cercin
Harpia	17	1, 800	2017-02-23	730	Cercin
Harpia	17	1, 800	2017-02-23	745	Cercin
Harpia	17	1, 800	2017-02-23	800	Cercin
Harpia	17	2, 200	2017-02-15	600	Cercin
Harpia	17	2, 200	2017-02-15	615	Cercin
Harpia	17	2, 200	2017-02-15	630	Cercin
Harpia	17	2, 200	2017-02-15	645	Cercin
Harpia	17	2, 200	2017-02-15	700	Cercin
Harpia	17	2, 200	2017-02-15	715	Cercin
Harpia	17	2, 200	2017-02-15	730	Cercin
Harpia	17	2, 200	2017-02-15	745	Cercin
Harpia	17	2, 200	2017-02-15	800	Cercin
Harpia	17	2, 600	2017-02-20	600	Cercin
Harpia	17	2, 600	2017-02-20	615	Cercin
Harpia	17	2, 600	2017-02-20	630	Cercin
Harpia	17	2, 600	2017-02-20	800	Cercin
Harpia	17	3, -50	2017-02-12	600	Cercin
Harpia	17	3, -50	2017-02-12	615	Cercin
Harpia	17	3, -50	2017-02-12	630	Cercin
Harpia	17	3, -50	2017-02-12	645	Cercin
Harpia	17	3, -50	2017-02-12	715	Cercin
Harpia	17	3, -50	2017-02-12	730	Cercin
Harpia	17	3, 400	2017-02-19	600	Cercin
Harpia	17	3, 400	2017-02-19	615	Cercin
Harpia	17	3, 400	2017-02-19	730	Cercin
Harpia	17	3, 400	2017-02-19	745	Cercin
Harpia	17	3, 800	2017-02-23	700	Cercin
Harpia	17	3, 800	2017-02-24	730	Cercin
Harpia	17	4, 200	2017-02-15	615	Cercin
Harpia	17	4, 600	2017-02-20	615	Cercin
Harpia	17	4, 600	2017-02-20	630	Cercin
Harpia	17	4, 600	2017-02-20	645	Cercin
Harpia	17	4, 600	2017-02-20	700	Cercin
Harpia	17	4, 600	2017-02-20	715	Cercin
Harpia	17	4, 600	2017-02-20	730	Cercin
Harpia	17	4, 600	2017-02-20	745	Cercin
Harpia	17	5, -50	2017-02-12	600	Cercin
Harpia	17	5, -50	2017-02-12	615	Cercin
Harpia	17	5, -50	2017-02-12	630	Cercin
Harpia	17	5, -50	2017-02-12	645	Cercin
Harpia	17	5, -50	2017-02-12	700	Cercin
Harpia	17	5, -50	2017-02-12	715	Cercin
Harpia	17	5, -50	2017-02-12	745	Cercin
Harpia	17	5, -50	2017-02-12	800	Cercin
Harpia	17	5, 400	2017-02-19	600	Cercin
Harpia	17	5, 400	2017-02-19	615	Cercin
Harpia	17	5, 400	2017-02-19	630	Cercin
Harpia	17	5, 400	2017-02-19	645	Cercin
Harpia	17	5, 400	2017-02-19	700	Cercin
Harpia	17	5, 400	2017-02-19	715	Cercin
Harpia	17	5, 400	2017-02-19	730	Cercin
Harpia	17	5, 400	2017-02-19	745	Cercin
Harpia	17	5, 400	2017-02-19	800	Cercin
Harpia	17	5, 800	2017-02-24	630	Cercin
Harpia	17	5, 800	2017-02-24	645	Cercin
Harpia	17	5, 800	2017-02-24	730	Cercin
Harpia	17	5, 800	2017-02-24	745	Cercin
Harpia	17	5, 800	2017-02-24	800	Cercin
Harpia	17	6, 600	2017-02-20	600	Cercin
Harpia	17	6, 600	2017-02-20	615	Cercin
Harpia	17	6, 600	2017-02-20	630	Cercin
Harpia	17	6, 600	2017-02-20	645	Cercin
Harpia	17	6, 600	2017-02-20	700	Cercin
Harpia	17	6, 600	2017-02-20	745	Cercin
Harpia	17	7, -50	2017-02-12	600	Cercin
Harpia	17	7, -50	2017-02-12	615	Cercin
Harpia	17	7, -50	2017-02-12	630	Cercin
Harpia	17	7, -50	2017-02-12	645	Cercin
Harpia	17	7, -50	2017-02-12	700	Cercin
Harpia	17	7, -50	2017-02-12	715	Cercin
Harpia	17	7, -50	2017-02-12	730	Cercin
Harpia	17	7, -50	2017-02-12	745	Cercin
Harpia	17	7, -50	2017-02-12	800	Cercin
Harpia	17	7, 400	2017-02-19	600	Cercin
Harpia	17	7, 400	2017-02-19	615	Cercin
Harpia	17	7, 400	2017-02-19	630	Cercin
Harpia	17	7, 400	2017-02-19	645	Cercin
Harpia	17	7, 400	2017-02-19	700	Cercin
Harpia	17	7, 400	2017-02-19	715	Cercin
Harpia	17	7, 400	2017-02-19	730	Cercin
Harpia	17	7, 400	2017-02-19	745	Cercin
Harpia	17	7, 400	2017-02-19	800	Cercin
Harpia	17	7, 800	2017-02-23	600	Cercin
Harpia	17	7, 800	2017-02-23	615	Cercin
Harpia	17	7, 800	2017-02-23	630	Cercin
Harpia	17	7, 800	2017-02-23	645	Cercin
Harpia	17	7, 800	2017-02-23	700	Cercin
Harpia	17	7, 800	2017-02-23	715	Cercin
Harpia	17	7, 800	2017-02-23	730	Cercin
Harpia	17	7, 800	2017-02-23	745	Cercin
Harpia	17	7, 800	2017-02-23	800	Cercin
Harpia	17	8, 200	2017-02-15	600	Cercin
Harpia	17	8, 200	2017-02-15	645	Cercin
Harpia	17	8, 200	2017-02-15	700	Cercin
Harpia	17	8, 200	2017-02-15	730	Cercin
Harpia	17	8, 200	2017-02-15	745	Cercin
Harpia	17	8, 200	2017-02-15	800	Cercin
Harpia	17	9, -50	2017-02-12	615	Cercin
Harpia	17	9, -50	2017-02-12	700	Cercin
Harpia	17	9, -50	2017-02-12	715	Cercin
Harpia	17	9, -50	2017-02-12	730	Cercin
Harpia	17	9, -50	2017-02-12	745	Cercin
Harpia	17	9, -50	2017-02-12	800	Cercin
Harpia	17	9, 400	2017-02-19	600	Cercin
Harpia	17	9, 400	2017-02-19	715	Cercin
Harpia	17	9, 800	2017-02-23	615	Cercin
Harpia	17	9, 800	2017-02-23	630	Cercin
Harpia	17	9, 800	2017-02-23	645	Cercin
Harpia	17	9, 800	2017-02-23	700	Cercin
Harpia	17	9, 800	2017-02-23	715	Cercin
Harpia	17	9, 800	2017-02-23	730	Cercin
Harpia	17	9, 800	2017-02-23	745	Cercin
Harpia	17	9, 800	2017-02-23	800	Cercin
Harpia	17	10, 200	2017-02-15	715	Cercin
Harpia	17	10, 200	2017-02-15	745	Cercin
Harpia	17	3, 800	2017-02-23	615	Cerser
Harpia	17	3, 800	2017-02-23	630	Cerser
Harpia	17	3, 800	2017-02-23	645	Cerser
Harpia	17	3, 800	2017-02-23	700	Cerser
Harpia	17	3, 800	2017-02-23	715	Cerser
Harpia	17	3, 800	2017-02-24	730	Cerser
Harpia	17	2, 600	2017-02-20	600	Chipar
Harpia	17	2, 600	2017-02-20	630	Chipar
Harpia	17	2, 600	2017-02-20	645	Chipar
Harpia	17	2, 600	2017-02-20	700	Chipar
Harpia	17	2, 600	2017-02-20	715	Chipar
Harpia	17	2, 600	2017-02-20	730	Chipar
Harpia	17	2, 600	2017-02-20	745	Chipar
Harpia	17	2, 600	2017-02-20	800	Chipar
Harpia	17	3, -50	2017-02-12	600	Chipar
Harpia	17	3, -50	2017-02-12	615	Chipar
Harpia	17	3, -50	2017-02-12	630	Chipar
Harpia	17	3, -50	2017-02-12	645	Chipar
Harpia	17	3, -50	2017-02-12	700	Chipar
Harpia	17	3, -50	2017-02-12	730	Chipar
Harpia	17	3, -50	2017-02-12	745	Chipar
Harpia	17	3, -50	2017-02-12	800	Chipar
Harpia	17	3, 400	2017-02-19	600	Chipar
Harpia	17	3, 400	2017-02-19	645	Chipar
Harpia	17	3, 400	2017-02-19	745	Chipar
Harpia	17	3, 800	2017-02-23	600	Chipar
Harpia	17	3, 800	2017-02-23	615	Chipar
Harpia	17	3, 800	2017-02-23	630	Chipar
Harpia	17	3, 800	2017-02-23	715	Chipar
Harpia	17	3, 800	2017-02-24	745	Chipar
Harpia	17	3, 800	2017-02-24	800	Chipar
Harpia	17	4, 600	2017-02-20	600	Chipar
Harpia	17	4, 600	2017-02-20	615	Chipar
Harpia	17	5, 800	2017-02-23	600	Chipar
Harpia	17	5, 800	2017-02-24	630	Chipar
Harpia	17	5, 800	2017-02-24	645	Chipar
Harpia	17	5, 800	2017-02-24	700	Chipar
Harpia	17	5, 800	2017-02-24	715	Chipar
Harpia	17	6, 600	2017-02-20	700	Chipar
Harpia	17	7, 400	2017-02-19	700	Chipar
Harpia	17	7, 800	2017-02-23	615	Chipar
Harpia	17	7, 800	2017-02-23	630	Chipar
Harpia	17	1, -50	2017-02-12	545	Cichuh
Harpia	17	3, -50	2017-02-12	545	Cichuh
Harpia	17	3, 800	2017-02-23	545	Cichuh
Harpia	17	6, 200	2017-02-15	545	Cichuh
Harpia	17	8, 600	2017-02-20	600	Cichuh
Harpia	17	9, 800	2017-02-23	545	Cichuh
Harpia	17	2, 200	2017-02-15	545	Cicvir
Harpia	17	3, 400	2017-02-19	545	Cicvir
Harpia	17	1, -50	2017-02-12	630	Colplu
Harpia	17	1, -50	2017-02-12	645	Colplu
Harpia	17	1, -50	2017-02-12	700	Colplu
Harpia	17	1, -50	2017-02-12	715	Colplu
Harpia	17	1, -50	2017-02-12	730	Colplu
Harpia	17	1, -50	2017-02-12	745	Colplu
Harpia	17	1, 400	2017-02-17	645	Colplu
Harpia	17	1, 400	2017-02-19	730	Colplu
Harpia	17	1, 400	2017-02-19	745	Colplu
Harpia	17	1, 400	2017-02-19	800	Colplu
Harpia	17	1, 800	2017-02-23	730	Colplu
Harpia	17	1, 800	2017-02-23	800	Colplu
Harpia	17	2, 200	2017-02-15	615	Colplu
Harpia	17	2, 200	2017-02-15	715	Colplu
Harpia	17	2, 200	2017-02-15	730	Colplu
Harpia	17	2, 200	2017-02-15	745	Colplu
Harpia	17	2, 200	2017-02-15	800	Colplu
Harpia	17	2, 600	2017-02-20	700	Colplu
Harpia	17	2, 600	2017-02-20	715	Colplu
Harpia	17	2, 600	2017-02-20	730	Colplu
Harpia	17	2, 600	2017-02-20	745	Colplu
Harpia	17	2, 600	2017-02-20	800	Colplu
Harpia	17	3, -50	2017-02-12	700	Colplu
Harpia	17	3, -50	2017-02-12	715	Colplu
Harpia	17	3, -50	2017-02-12	730	Colplu
Harpia	17	3, -50	2017-02-12	745	Colplu
Harpia	17	3, 400	2017-02-19	700	Colplu
Harpia	17	3, 400	2017-02-19	730	Colplu
Harpia	17	3, 800	2017-02-23	715	Colplu
Harpia	17	3, 800	2017-02-24	730	Colplu
Harpia	17	3, 800	2017-02-24	745	Colplu
Harpia	17	3, 800	2017-02-24	800	Colplu
Harpia	17	4, 200	2017-02-15	645	Colplu
Harpia	17	4, 200	2017-02-15	715	Colplu
Harpia	17	4, 600	2017-02-20	630	Colplu
Harpia	17	4, 600	2017-02-20	700	Colplu
Harpia	17	4, 600	2017-02-20	715	Colplu
Harpia	17	4, 600	2017-02-20	730	Colplu
Harpia	17	4, 600	2017-02-20	745	Colplu
Harpia	17	4, 600	2017-02-20	800	Colplu
Harpia	17	5, -50	2017-02-12	700	Colplu
Harpia	17	5, -50	2017-02-12	730	Colplu
Harpia	17	5, -50	2017-02-12	745	Colplu
Harpia	17	5, 400	2017-02-19	715	Colplu
Harpia	17	5, 400	2017-02-19	730	Colplu
Harpia	17	5, 400	2017-02-19	745	Colplu
Harpia	17	5, 800	2017-02-24	630	Colplu
Harpia	17	5, 800	2017-02-24	645	Colplu
Harpia	17	5, 800	2017-02-24	700	Colplu
Harpia	17	5, 800	2017-02-24	715	Colplu
Harpia	17	5, 800	2017-02-24	730	Colplu
Harpia	17	5, 800	2017-02-24	745	Colplu
Harpia	17	5, 800	2017-02-24	800	Colplu
Harpia	17	6, 200	2017-02-15	645	Colplu
Harpia	17	6, 600	2017-02-20	615	Colplu
Harpia	17	6, 600	2017-02-20	630	Colplu
Harpia	17	6, 600	2017-02-20	645	Colplu
Harpia	17	6, 600	2017-02-20	700	Colplu
Harpia	17	6, 600	2017-02-20	715	Colplu
Harpia	17	6, 600	2017-02-20	730	Colplu
Harpia	17	6, 600	2017-02-20	800	Colplu
Harpia	17	7, -50	2017-02-12	630	Colplu
Harpia	17	7, -50	2017-02-12	645	Colplu
Harpia	17	7, -50	2017-02-12	715	Colplu
Harpia	17	7, -50	2017-02-12	730	Colplu
Harpia	17	7, -50	2017-02-12	745	Colplu
Harpia	17	7, -50	2017-02-12	800	Colplu
Harpia	17	7, 400	2017-02-19	645	Colplu
Harpia	17	7, 400	2017-02-19	700	Colplu
Harpia	17	7, 400	2017-02-19	715	Colplu
Harpia	17	7, 400	2017-02-19	730	Colplu
Harpia	17	7, 400	2017-02-19	745	Colplu
Harpia	17	7, 800	2017-02-23	645	Colplu
Harpia	17	7, 800	2017-02-23	700	Colplu
Harpia	17	7, 800	2017-02-23	715	Colplu
Harpia	17	7, 800	2017-02-23	730	Colplu
Harpia	17	7, 800	2017-02-23	745	Colplu
Harpia	17	7, 800	2017-02-23	800	Colplu
Harpia	17	8, 200	2017-02-15	645	Colplu
Harpia	17	8, 200	2017-02-15	700	Colplu
Harpia	17	8, 200	2017-02-15	715	Colplu
Harpia	17	8, 200	2017-02-15	800	Colplu
Harpia	17	8, 600	2017-02-20	615	Colplu
Harpia	17	8, 600	2017-02-20	630	Colplu
Harpia	17	8, 600	2017-02-20	645	Colplu
Harpia	17	8, 600	2017-02-20	700	Colplu
Harpia	17	8, 600	2017-02-20	715	Colplu
Harpia	17	8, 600	2017-02-20	730	Colplu
Harpia	17	8, 600	2017-02-20	745	Colplu
Harpia	17	8, 600	2017-02-20	800	Colplu
Harpia	17	9, -50	2017-02-12	630	Colplu
Harpia	17	9, -50	2017-02-12	645	Colplu
Harpia	17	9, -50	2017-02-12	700	Colplu
Harpia	17	9, -50	2017-02-12	715	Colplu
Harpia	17	9, -50	2017-02-12	745	Colplu
Harpia	17	9, -50	2017-02-12	745	Colplu
Harpia	17	9, 400	2017-02-19	715	Colplu
Harpia	17	9, 400	2017-02-19	730	Colplu
Harpia	17	9, 400	2017-02-19	745	Colplu
Harpia	17	9, 400	2017-02-19	800	Colplu
Harpia	17	9, 800	2017-02-23	645	Colplu
Harpia	17	9, 800	2017-02-23	700	Colplu
Harpia	17	9, 800	2017-02-23	715	Colplu
Harpia	17	9, 800	2017-02-23	730	Colplu
Harpia	17	9, 800	2017-02-23	745	Colplu
Harpia	17	9, 800	2017-02-23	800	Colplu
Harpia	17	10, 200	2017-02-15	645	Colplu
Harpia	17	10, 200	2017-02-15	700	Colplu
Harpia	17	10, 200	2017-02-15	715	Colplu
Harpia	17	10, 200	2017-02-15	800	Colplu
Harpia	17	10, 600	2017-02-20	615	Colplu
Harpia	17	10, 600	2017-02-20	630	Colplu
Harpia	17	10, 600	2017-02-20	645	Colplu
Harpia	17	10, 600	2017-02-20	700	Colplu
Harpia	17	10, 600	2017-02-20	715	Colplu
Harpia	17	10, 600	2017-02-20	730	Colplu
Harpia	17	10, 600	2017-02-20	745	Colplu
Harpia	17	10, 600	2017-02-20	800	Colplu
Harpia	17	7, 800	2017-02-23	630	Cortor
Harpia	17	1, 800	2017-02-23	800	Crycin
Harpia	17	1, 800	2017-02-23	745	Crysou
Harpia	17	2, 200	2017-02-15	715	Crysou
Harpia	17	2, 200	2017-02-15	730	Crysou
Harpia	17	2, 200	2017-02-15	745	Crysou
Harpia	17	2, 200	2017-02-15	800	Crysou
Harpia	17	3, -50	2017-02-12	615	Crysou
Harpia	17	3, -50	2017-02-12	730	Crysou
Harpia	17	3, 800	2017-02-23	645	Crysou
Harpia	17	4, 200	2017-02-15	715	Crysou
Harpia	17	4, 200	2017-02-15	730	Crysou
Harpia	17	4, 200	2017-02-15	745	Crysou
Harpia	17	4, 200	2017-02-15	800	Crysou
Harpia	17	5, -50	2017-02-12	615	Crysou
Harpia	17	5, -50	2017-02-12	730	Crysou
Harpia	17	5, 800	2017-02-23	545	Crysou
Harpia	17	1, 800	2017-02-23	545	Cryund
Harpia	17	1, 800	2017-02-23	600	Cryund
Harpia	17	1, 800	2017-02-23	615	Cryund
Harpia	17	1, 800	2017-02-23	630	Cryund
Harpia	17	1, 800	2017-02-23	645	Cryund
Harpia	17	1, 800	2017-02-23	700	Cryund
Harpia	17	1, 800	2017-02-23	715	Cryund
Harpia	17	1, 800	2017-02-23	730	Cryund
Harpia	17	1, 800	2017-02-23	745	Cryund
Harpia	17	1, 800	2017-02-23	800	Cryund
Harpia	17	2, 200	2017-02-15	600	Cryvar
Harpia	17	2, 600	2017-02-20	600	Cryvar
Harpia	17	3, 400	2017-02-19	615	Cryvar
Harpia	17	3, 800	2017-02-23	645	Cryvar
Harpia	17	4, 200	2017-02-16	600	Cryvar
Harpia	17	5, 800	2017-02-24	630	Cryvar
Harpia	17	5, 800	2017-02-24	645	Cryvar
Harpia	17	5, 800	2017-02-24	700	Cryvar
Harpia	17	7, 400	2017-02-19	545	Cryvar
Harpia	17	7, 800	2017-02-23	600	Cryvar
Harpia	17	8, 200	2017-02-15	545	Cryvar
Harpia	17	8, 200	2017-02-15	615	Cryvar
Harpia	17	8, 600	2017-02-20	600	Cryvar
Harpia	17	8, 600	2017-02-20	715	Cryvar
Harpia	17	8, 600	2017-02-20	730	Cryvar
Harpia	17	9, 400	2017-02-19	600	Cryvar
Harpia	17	9, 800	2017-02-23	600	Cryvar
Harpia	17	9, 800	2017-02-23	615	Cryvar
Harpia	17	9, 800	2017-02-23	630	Cryvar
Harpia	17	10, 200	2017-02-15	545	Cryvar
Harpia	17	10, 200	2017-02-15	600	Cryvar
Harpia	17	10, 200	2017-02-15	615	Cryvar
Harpia	17	10, 200	2017-02-15	630	Cryvar
Harpia	17	10, 600	2017-02-20	600	Cryvar
Harpia	17	10, 600	2017-02-20	630	Cryvar
Harpia	17	10, 600	2017-02-20	715	Cryvar
Harpia	17	10, 600	2017-02-20	730	Cryvar
Harpia	17	3, -50	2017-02-12	615	Cyacya
Harpia	17	3, -50	2017-02-12	630	Cyacya
Harpia	17	3, 800	2017-02-24	745	Cyacya
Harpia	17	4, 200	2017-02-15	730	Cyacya
Harpia	17	4, 600	2017-02-20	645	Cyacya
Harpia	17	7, 800	2017-02-23	715	Cyacya
Harpia	17	7, 800	2017-02-23	730	Cyacya
Harpia	17	7, 800	2017-02-23	745	Cyacya
Harpia	17	7, 800	2017-02-23	800	Cyacya
Harpia	17	9, 400	2017-02-19	615	Cyacya
Harpia	17	1, 800	2017-02-23	745	Cyavio
Harpia	17	1, 800	2017-02-23	800	Cyavio
Harpia	17	4, 600	2017-02-20	630	Cyavio
Harpia	17	1, -50	2017-02-12	630	Cymlin
Harpia	17	1, -50	2017-02-12	715	Cymlin
Harpia	17	1, 400	2017-02-19	745	Cymlin
Harpia	17	1, 800	2017-02-23	645	Cymlin
Harpia	17	1, 800	2017-02-23	700	Cymlin
Harpia	17	2, 200	2017-02-15	645	Cymlin
Harpia	17	2, 200	2017-02-15	700	Cymlin
Harpia	17	2, 600	2017-02-20	615	Cymlin
Harpia	17	2, 600	2017-02-20	630	Cymlin
Harpia	17	2, 600	2017-02-20	645	Cymlin
Harpia	17	2, 600	2017-02-20	800	Cymlin
Harpia	17	3, 400	2017-02-19	600	Cymlin
Harpia	17	3, 400	2017-02-19	615	Cymlin
Harpia	17	3, 400	2017-02-19	630	Cymlin
Harpia	17	3, 400	2017-02-19	645	Cymlin
Harpia	17	3, 400	2017-02-19	700	Cymlin
Harpia	17	3, 400	2017-02-19	715	Cymlin
Harpia	17	3, 400	2017-02-19	730	Cymlin
Harpia	17	3, 400	2017-02-19	745	Cymlin
Harpia	17	3, 400	2017-02-19	800	Cymlin
Harpia	17	3, 800	2017-02-23	645	Cymlin
Harpia	17	3, 800	2017-02-23	700	Cymlin
Harpia	17	3, 800	2017-02-23	715	Cymlin
Harpia	17	3, 800	2017-02-24	730	Cymlin
Harpia	17	3, 800	2017-02-24	745	Cymlin
Harpia	17	4, 600	2017-02-20	615	Cymlin
Harpia	17	4, 600	2017-02-20	630	Cymlin
Harpia	17	4, 600	2017-02-20	645	Cymlin
Harpia	17	4, 600	2017-02-20	700	Cymlin
Harpia	17	4, 600	2017-02-20	730	Cymlin
Harpia	17	4, 600	2017-02-20	800	Cymlin
Harpia	17	5, 400	2017-02-19	600	Cymlin
Harpia	17	5, 400	2017-02-19	630	Cymlin
Harpia	17	5, 400	2017-02-19	645	Cymlin
Harpia	17	6, 200	2017-02-15	700	Cymlin
Harpia	17	6, 200	2017-02-15	730	Cymlin
Harpia	17	6, 200	2017-02-15	745	Cymlin
Harpia	17	6, 200	2017-02-15	800	Cymlin
Harpia	17	7, -50	2017-02-12	630	Cymlin
Harpia	17	7, -50	2017-02-12	715	Cymlin
Harpia	17	9, -50	2017-02-12	615	Cymlin
Harpia	17	9, -50	2017-02-12	630	Cymlin
Harpia	17	9, -50	2017-02-12	645	Cymlin
Harpia	17	9, -50	2017-02-12	700	Cymlin
Harpia	17	9, -50	2017-02-12	715	Cymlin
Harpia	17	9, 400	2017-02-19	630	Cymlin
Harpia	17	9, 400	2017-02-19	645	Cymlin
Harpia	17	9, 400	2017-02-19	715	Cymlin
Harpia	17	9, 400	2017-02-19	730	Cymlin
Harpia	17	9, 400	2017-02-19	745	Cymlin
Harpia	17	10, 200	2017-02-15	715	Cymlin
Harpia	17	10, 200	2017-02-15	745	Cymlin
Harpia	17	10, 200	2017-02-15	800	Cymlin
Harpia	17	10, 600	2017-02-20	600	Cymlin
Harpia	17	10, 600	2017-02-20	615	Cymlin
Harpia	17	4, 200	2017-02-16	600	Dapame
Harpia	17	9, -50	2017-02-12	600	Dapame
Harpia	17	1, 400	2017-02-17	715	Dapate
Harpia	17	1, -50	2017-02-12	600	Dencer
Harpia	17	1, 800	2017-02-23	645	Dencer
Harpia	17	2, 200	2017-02-15	600	Dencer
Harpia	17	3, -50	2017-02-12	600	Dencer
Harpia	17	3, 400	2017-02-19	600	Dencer
Harpia	17	4, 600	2017-02-20	600	Dencer
Harpia	17	5, -50	2017-02-12	545	Dencer
Harpia	17	5, -50	2017-02-12	600	Dencer
Harpia	17	7, -50	2017-02-12	545	Dencer
Harpia	17	7, -50	2017-02-12	730	Dencer
Harpia	17	9, 400	2017-02-19	545	Dencer
Harpia	17	9, 400	2017-02-19	600	Dencer
Harpia	17	9, 400	2017-02-19	615	Dencer
Harpia	17	10, 600	2017-02-20	545	Dencer
Harpia	17	10, 600	2017-02-20	600	Dencer
Harpia	17	1, -50	2017-02-12	600	Denruf
Harpia	17	3, -50	2017-02-12	600	Denruf
Harpia	17	3, 800	2017-02-23	600	Denruf
Harpia	17	5, 800	2017-02-23	600	Denruf
Harpia	17	5, 800	2017-02-24	615	Denruf
Harpia	17	6, 200	2017-02-15	600	Denruf
Harpia	17	8, 200	2017-02-15	600	Denruf
Harpia	17	8, 600	2017-02-20	600	Denruf
Harpia	17	9, -50	2017-02-12	600	Denruf
Harpia	17	10, 200	2017-02-15	600	Denruf
Harpia	17	1, 400	2017-02-19	800	Drylin
Harpia	17	6, 200	2017-02-15	730	Eupruf
Harpia	17	6, 200	2017-02-15	745	Eupruf
Harpia	17	1, -50	2017-02-12	600	Eupxan
Harpia	17	1, -50	2017-02-12	615	Eupxan
Harpia	17	1, -50	2017-02-12	630	Eupxan
Harpia	17	1, -50	2017-02-12	645	Eupxan
Harpia	17	1, -50	2017-02-12	700	Eupxan
Harpia	17	1, -50	2017-02-12	745	Eupxan
Harpia	17	1, 800	2017-02-23	630	Eupxan
Harpia	17	1, 800	2017-02-23	700	Eupxan
Harpia	17	3, 400	2017-02-19	645	Eupxan
Harpia	17	3, 800	2017-02-24	800	Eupxan
Harpia	17	9, 400	2017-02-19	700	Eupxan
Harpia	17	9, 400	2017-02-19	800	Eupxan
Harpia	17	10, 200	2017-02-15	800	Eupxan
Harpia	17	1, -50	2017-02-12	630	Forana
Harpia	17	5, 400	2017-02-19	600	Forana
Harpia	17	8, 200	2017-02-15	600	Forana
Harpia	17	3, -50	2017-02-12	630	Forcol
Harpia	17	4, 200	2017-02-15	630	Forcol
Harpia	17	4, 600	2017-02-20	630	Forcol
Harpia	17	4, 600	2017-02-20	700	Forcol
Harpia	17	4, 600	2017-02-20	715	Forcol
Harpia	17	4, 600	2017-02-20	800	Forcol
Harpia	17	6, 200	2017-02-15	715	Forcol
Harpia	17	6, 200	2017-02-15	730	Forcol
Harpia	17	6, 200	2017-02-15	730	Forcol
Harpia	17	6, 200	2017-02-15	800	Forcol
Harpia	17	4, 600	2017-02-20	600	Freund
Harpia	17	5, 400	2017-02-19	600	Freund
Harpia	17	8, 200	2017-02-15	600	Freund
Harpia	17	6, 200	2017-02-15	600	Galalb
Harpia	17	6, 200	2017-02-15	615	Galalb
Harpia	17	6, 200	2017-02-15	630	Galalb
Harpia	17	9, 400	2017-02-19	700	Galalb
Harpia	17	9, 400	2017-02-19	715	Galalb
Harpia	17	9, 400	2017-02-19	730	Galalb
Harpia	17	9, 400	2017-02-19	745	Galalb
Harpia	17	9, 400	2017-02-19	800	Galalb
Harpia	17	1, 400	2017-02-17	615	Geomon
Harpia	17	1, 800	2017-02-23	615	Geomon
Harpia	17	1, 800	2017-02-23	630	Geomon
Harpia	17	1, 800	2017-02-23	645	Geomon
Harpia	17	1, 800	2017-02-23	700	Geomon
Harpia	17	1, 800	2017-02-23	715	Geomon
Harpia	17	1, 800	2017-02-23	730	Geomon
Harpia	17	1, 800	2017-02-23	745	Geomon
Harpia	17	1, 800	2017-02-23	800	Geomon
Harpia	17	2, 200	2017-02-15	645	Geomon
Harpia	17	2, 600	2017-02-20	630	Geomon
Harpia	17	3, -50	2017-02-12	600	Geomon
Harpia	17	3, -50	2017-02-12	615	Geomon
Harpia	17	3, -50	2017-02-12	630	Geomon
Harpia	17	3, -50	2017-02-12	715	Geomon
Harpia	17	3, -50	2017-02-12	730	Geomon
Harpia	17	3, 400	2017-02-19	645	Geomon
Harpia	17	3, 800	2017-02-23	600	Geomon
Harpia	17	3, 800	2017-02-23	615	Geomon
Harpia	17	4, 200	2017-02-16	600	Geomon
Harpia	17	4, 200	2017-02-15	615	Geomon
Harpia	17	4, 200	2017-02-15	630	Geomon
Harpia	17	4, 200	2017-02-15	645	Geomon
Harpia	17	4, 200	2017-02-15	700	Geomon
Harpia	17	4, 200	2017-02-15	715	Geomon
Harpia	17	4, 600	2017-02-20	615	Geomon
Harpia	17	5, -50	2017-02-12	645	Geomon
Harpia	17	5, -50	2017-02-12	700	Geomon
Harpia	17	5, -50	2017-02-12	715	Geomon
Harpia	17	5, 400	2017-02-19	645	Geomon
Harpia	17	5, 400	2017-02-19	700	Geomon
Harpia	17	5, 400	2017-02-19	715	Geomon
Harpia	17	5, 400	2017-02-19	730	Geomon
Harpia	17	5, 800	2017-02-24	745	Geomon
Harpia	17	6, 200	2017-02-15	645	Geomon
Harpia	17	6, 200	2017-02-15	700	Geomon
Harpia	17	6, 600	2017-02-20	630	Geomon
Harpia	17	7, -50	2017-02-12	600	Geomon
Harpia	17	7, -50	2017-02-12	615	Geomon
Harpia	17	7, -50	2017-02-12	645	Geomon
Harpia	17	7, -50	2017-02-12	700	Geomon
Harpia	17	7, -50	2017-02-12	715	Geomon
Harpia	17	7, -50	2017-02-12	730	Geomon
Harpia	17	7, -50	2017-02-12	745	Geomon
Harpia	17	7, -50	2017-02-12	800	Geomon
Harpia	17	7, 400	2017-02-19	600	Geomon
Harpia	17	7, 400	2017-02-19	615	Geomon
Harpia	17	7, 400	2017-02-19	630	Geomon
Harpia	17	7, 400	2017-02-19	645	Geomon
Harpia	17	7, 400	2017-02-19	700	Geomon
Harpia	17	7, 400	2017-02-19	715	Geomon
Harpia	17	7, 400	2017-02-19	730	Geomon
Harpia	17	7, 400	2017-02-19	745	Geomon
Harpia	17	7, 400	2017-02-19	800	Geomon
Harpia	17	7, 800	2017-02-23	615	Geomon
Harpia	17	7, 800	2017-02-23	630	Geomon
Harpia	17	8, 200	2017-02-15	600	Geomon
Harpia	17	8, 200	2017-02-15	615	Geomon
Harpia	17	8, 200	2017-02-15	630	Geomon
Harpia	17	8, 200	2017-02-15	645	Geomon
Harpia	17	8, 200	2017-02-15	700	Geomon
Harpia	17	8, 200	2017-02-15	715	Geomon
Harpia	17	8, 200	2017-02-15	730	Geomon
Harpia	17	8, 200	2017-02-15	745	Geomon
Harpia	17	8, 600	2017-02-20	545	Geomon
Harpia	17	8, 600	2017-02-20	615	Geomon
Harpia	17	8, 600	2017-02-20	630	Geomon
Harpia	17	8, 600	2017-02-20	645	Geomon
Harpia	17	8, 600	2017-02-20	700	Geomon
Harpia	17	8, 600	2017-02-20	715	Geomon
Harpia	17	8, 600	2017-02-20	730	Geomon
Harpia	17	9, -50	2017-02-12	630	Geomon
Harpia	17	9, -50	2017-02-12	645	Geomon
Harpia	17	9, -50	2017-02-12	700	Geomon
Harpia	17	9, -50	2017-02-12	715	Geomon
Harpia	17	9, -50	2017-02-12	745	Geomon
Harpia	17	9, -50	2017-02-12	800	Geomon
Harpia	17	9, 400	2017-02-19	615	Geomon
Harpia	17	9, 400	2017-02-19	630	Geomon
Harpia	17	9, 400	2017-02-19	645	Geomon
Harpia	17	9, 400	2017-02-19	700	Geomon
Harpia	17	9, 400	2017-02-19	715	Geomon
Harpia	17	9, 400	2017-02-19	730	Geomon
Harpia	17	10, 200	2017-02-15	545	Geomon
Harpia	17	10, 200	2017-02-15	600	Geomon
Harpia	17	10, 200	2017-02-15	615	Geomon
Harpia	17	10, 200	2017-02-15	630	Geomon
Harpia	17	10, 200	2017-02-15	645	Geomon
Harpia	17	10, 200	2017-02-15	700	Geomon
Harpia	17	4, 200	2017-02-15	545	Glabra
Harpia	17	1, -50	2017-02-12	730	Glyspi
Harpia	17	2, 600	2017-02-20	645	Glyspi
Harpia	17	2, 600	2017-02-20	700	Glyspi
Harpia	17	2, 600	2017-02-20	715	Glyspi
Harpia	17	3, -50	2017-02-12	600	Glyspi
Harpia	17	3, -50	2017-02-12	615	Glyspi
Harpia	17	3, 400	2017-02-19	615	Glyspi
Harpia	17	3, 800	2017-02-23	630	Glyspi
Harpia	17	3, 800	2017-02-24	730	Glyspi
Harpia	17	3, 800	2017-02-24	745	Glyspi
Harpia	17	3, 800	2017-02-24	800	Glyspi
Harpia	17	4, 200	2017-02-15	630	Glyspi
Harpia	17	4, 600	2017-02-20	615	Glyspi
Harpia	17	4, 600	2017-02-20	800	Glyspi
Harpia	17	5, -50	2017-02-12	730	Glyspi
Harpia	17	5, -50	2017-02-12	745	Glyspi
Harpia	17	5, 400	2017-02-19	600	Glyspi
Harpia	17	5, 400	2017-02-19	630	Glyspi
Harpia	17	5, 400	2017-02-19	630	Glyspi
Harpia	17	5, 400	2017-02-19	715	Glyspi
Harpia	17	5, 800	2017-02-23	600	Glyspi
Harpia	17	5, 800	2017-02-24	615	Glyspi
Harpia	17	5, 800	2017-02-24	630	Glyspi
Harpia	17	5, 800	2017-02-24	645	Glyspi
Harpia	17	5, 800	2017-02-24	700	Glyspi
Harpia	17	6, 200	2017-02-15	615	Glyspi
Harpia	17	6, 200	2017-02-15	630	Glyspi
Harpia	17	6, 200	2017-02-15	645	Glyspi
Harpia	17	6, 200	2017-02-15	730	Glyspi
Harpia	17	6, 600	2017-02-20	615	Glyspi
Harpia	17	7, -50	2017-02-12	700	Glyspi
Harpia	17	7, -50	2017-02-12	730	Glyspi
Harpia	17	7, 400	2017-02-19	615	Glyspi
Harpia	17	7, 400	2017-02-19	715	Glyspi
Harpia	17	7, 800	2017-02-23	600	Glyspi
Harpia	17	7, 800	2017-02-23	615	Glyspi
Harpia	17	8, 200	2017-02-15	700	Glyspi
Harpia	17	8, 600	2017-02-20	630	Glyspi
Harpia	17	9, -50	2017-02-12	700	Glyspi
Harpia	17	9, 400	2017-02-19	645	Glyspi
Harpia	17	9, 400	2017-02-19	800	Glyspi
Harpia	17	9, 800	2017-02-23	730	Glyspi
Harpia	17	10, 200	2017-02-15	615	Glyspi
Harpia	17	10, 200	2017-02-15	715	Glyspi
Harpia	17	1, 400	2017-02-17	615	Gymleu
Harpia	17	2, 600	2017-02-20	700	Gymleu
Harpia	17	8, 600	2017-02-20	630	Gymleu
Harpia	17	3, -50	2017-02-12	730	Gymlun
Harpia	17	7, -50	2017-02-12	615	Hemzoz
Harpia	17	7, -50	2017-02-12	630	Hemzoz
Harpia	17	7, -50	2017-02-12	700	Hemzoz
Harpia	17	1, -50	2017-02-12	615	Henleu
Harpia	17	4, 600	2017-02-20	700	Henleu
Harpia	17	7, -50	2017-02-12	700	Henleu
Harpia	17	7, -50	2017-02-12	715	Henleu
Harpia	17	7, -50	2017-02-12	730	Henleu
Harpia	17	7, -50	2017-02-12	745	Henleu
Harpia	17	7, -50	2017-02-12	800	Henleu
Harpia	17	7, 400	2017-02-19	715	Henleu
Harpia	17	7, 400	2017-02-19	715	Henleu
Harpia	17	7, 800	2017-02-23	545	Hercac
Harpia	17	3, 800	2017-02-23	715	Herdug
Harpia	17	1, 800	2017-02-23	630	Hylhyp
Harpia	17	3, 800	2017-02-23	630	Hylhyp
Harpia	17	3, 800	2017-02-23	700	Hylhyp
Harpia	17	3, 800	2017-02-23	715	Hylhyp
Harpia	17	3, 800	2017-02-24	730	Hylhyp
Harpia	17	3, 800	2017-02-24	745	Hylhyp
Harpia	17	3, 800	2017-02-24	800	Hylhyp
Harpia	17	4, 600	2017-02-20	730	Hylhyp
Harpia	17	5, -50	2017-02-12	645	Hylhyp
Harpia	17	5, -50	2017-02-12	800	Hylhyp
Harpia	17	5, 400	2017-02-19	645	Hylhyp
Harpia	17	5, 800	2017-02-24	615	Hylhyp
Harpia	17	5, 800	2017-02-24	630	Hylhyp
Harpia	17	5, 800	2017-02-24	645	Hylhyp
Harpia	17	5, 800	2017-02-24	730	Hylhyp
Harpia	17	6, 200	2017-02-15	615	Hylhyp
Harpia	17	6, 200	2017-02-15	630	Hylhyp
Harpia	17	6, 200	2017-02-15	700	Hylhyp
Harpia	17	6, 200	2017-02-15	715	Hylhyp
Harpia	17	6, 200	2017-02-15	715	Hylhyp
Harpia	17	6, 600	2017-02-20	630	Hylhyp
Harpia	17	6, 600	2017-02-20	645	Hylhyp
Harpia	17	6, 600	2017-02-20	700	Hylhyp
Harpia	17	6, 600	2017-02-20	715	Hylhyp
Harpia	17	6, 600	2017-02-20	730	Hylhyp
Harpia	17	6, 600	2017-02-20	745	Hylhyp
Harpia	17	6, 600	2017-02-20	800	Hylhyp
Harpia	17	7, -50	2017-02-12	645	Hylhyp
Harpia	17	7, -50	2017-02-12	700	Hylhyp
Harpia	17	7, -50	2017-02-12	715	Hylhyp
Harpia	17	7, -50	2017-02-12	730	Hylhyp
Harpia	17	7, -50	2017-02-12	745	Hylhyp
Harpia	17	7, -50	2017-02-12	800	Hylhyp
Harpia	17	7, 400	2017-02-19	645	Hylhyp
Harpia	17	7, 800	2017-02-23	615	Hylhyp
Harpia	17	7, 800	2017-02-23	715	Hylhyp
Harpia	17	8, 200	2017-02-15	630	Hylhyp
Harpia	17	8, 200	2017-02-15	645	Hylhyp
Harpia	17	8, 200	2017-02-15	700	Hylhyp
Harpia	17	8, 600	2017-02-20	615	Hylhyp
Harpia	17	8, 600	2017-02-20	630	Hylhyp
Harpia	17	8, 600	2017-02-20	645	Hylhyp
Harpia	17	8, 600	2017-02-20	700	Hylhyp
Harpia	17	8, 600	2017-02-20	715	Hylhyp
Harpia	17	8, 600	2017-02-20	730	Hylhyp
Harpia	17	8, 600	2017-02-20	745	Hylhyp
Harpia	17	8, 600	2017-02-20	800	Hylhyp
Harpia	17	10, 200	2017-02-15	700	Hylhyp
Harpia	17	10, 200	2017-02-15	715	Hylhyp
Harpia	17	10, 200	2017-02-15	730	Hylhyp
Harpia	17	10, 200	2017-02-15	745	Hylhyp
Harpia	17	1, -50	2017-02-12	615	Hylnae
Harpia	17	4, 600	2017-02-20	730	Hylnae
Harpia	17	4, 600	2017-02-20	745	Hylnae
Harpia	17	5, 800	2017-02-24	615	Hylnae
Harpia	17	8, 600	2017-02-20	600	Hylnae
Harpia	17	8, 600	2017-02-20	615	Hylnae
Harpia	17	8, 600	2017-02-20	630	Hylnae
Harpia	17	8, 600	2017-02-20	645	Hylnae
Harpia	17	8, 600	2017-02-20	700	Hylnae
Harpia	17	8, 600	2017-02-20	715	Hylnae
Harpia	17	8, 600	2017-02-20	800	Hylnae
Harpia	17	9, 400	2017-02-19	615	Hylnae
Harpia	17	9, 400	2017-02-19	700	Hylnae
Harpia	17	9, 400	2017-02-19	730	Hylnae
Harpia	17	9, 400	2017-02-19	800	Hylnae
Harpia	17	10, 600	2017-02-20	730	Hylnae
Harpia	17	10, 600	2017-02-20	745	Hylnae
Harpia	17	3, 400	2017-02-19	600	Hyloch
Harpia	17	3, 400	2017-02-19	615	Hyloch
Harpia	17	3, 400	2017-02-19	630	Hyloch
Harpia	17	3, 400	2017-02-19	645	Hyloch
Harpia	17	3, 400	2017-02-19	700	Hyloch
Harpia	17	3, 400	2017-02-19	715	Hyloch
Harpia	17	3, 400	2017-02-19	730	Hyloch
Harpia	17	3, 800	2017-02-24	730	Hyloch
Harpia	17	3, 800	2017-02-24	745	Hyloch
Harpia	17	4, 200	2017-02-15	645	Hyloch
Harpia	17	4, 200	2017-02-15	700	Hyloch
Harpia	17	4, 600	2017-02-20	615	Hyloch
Harpia	17	4, 600	2017-02-20	630	Hyloch
Harpia	17	5, 400	2017-02-19	715	Hyloch
Harpia	17	6, 200	2017-02-15	630	Hyloch
Harpia	17	6, 200	2017-02-15	645	Hyloch
Harpia	17	6, 600	2017-02-20	615	Hyloch
Harpia	17	6, 600	2017-02-20	630	Hyloch
Harpia	17	6, 600	2017-02-20	715	Hyloch
Harpia	17	10, 200	2017-02-15	615	Hyloch
Harpia	17	10, 200	2017-02-15	630	Hyloch
Harpia	17	10, 200	2017-02-15	645	Hyloch
Harpia	17	10, 600	2017-02-20	615	Hyloch
Harpia	17	1, -50	2017-02-12	630	Hylpoe
Harpia	17	1, -50	2017-02-12	700	Hylpoe
Harpia	17	1, -50	2017-02-12	800	Hylpoe
Harpia	17	1, 400	2017-02-17	630	Hylpoe
Harpia	17	1, 800	2017-02-23	600	Hylpoe
Harpia	17	1, 800	2017-02-23	630	Hylpoe
Harpia	17	2, 200	2017-02-15	600	Hylpoe
Harpia	17	2, 200	2017-02-15	630	Hylpoe
Harpia	17	2, 600	2017-02-20	630	Hylpoe
Harpia	17	2, 600	2017-02-20	700	Hylpoe
Harpia	17	3, -50	2017-02-12	600	Hylpoe
Harpia	17	3, -50	2017-02-12	615	Hylpoe
Harpia	17	3, -50	2017-02-12	630	Hylpoe
Harpia	17	3, 400	2017-02-19	600	Hylpoe
Harpia	17	3, 400	2017-02-19	615	Hylpoe
Harpia	17	3, 400	2017-02-19	630	Hylpoe
Harpia	17	3, 400	2017-02-19	700	Hylpoe
Harpia	17	3, 400	2017-02-19	730	Hylpoe
Harpia	17	3, 400	2017-02-19	745	Hylpoe
Harpia	17	3, 800	2017-02-23	600	Hylpoe
Harpia	17	3, 800	2017-02-23	645	Hylpoe
Harpia	17	3, 800	2017-02-24	730	Hylpoe
Harpia	17	3, 800	2017-02-24	745	Hylpoe
Harpia	17	4, 200	2017-02-15	615	Hylpoe
Harpia	17	4, 600	2017-02-20	600	Hylpoe
Harpia	17	4, 600	2017-02-20	615	Hylpoe
Harpia	17	4, 600	2017-02-20	630	Hylpoe
Harpia	17	5, 400	2017-02-19	600	Hylpoe
Harpia	17	5, 400	2017-02-19	615	Hylpoe
Harpia	17	5, 400	2017-02-19	630	Hylpoe
Harpia	17	5, 800	2017-02-24	630	Hylpoe
Harpia	17	5, 800	2017-02-24	745	Hylpoe
Harpia	17	5, 800	2017-02-24	800	Hylpoe
Harpia	17	6, 200	2017-02-15	600	Hylpoe
Harpia	17	6, 200	2017-02-15	615	Hylpoe
Harpia	17	6, 200	2017-02-15	645	Hylpoe
Harpia	17	6, 200	2017-02-15	700	Hylpoe
Harpia	17	7, -50	2017-02-12	600	Hylpoe
Harpia	17	7, -50	2017-02-12	600	Hylpoe
Harpia	17	7, -50	2017-02-12	615	Hylpoe
Harpia	17	7, -50	2017-02-12	630	Hylpoe
Harpia	17	7, -50	2017-02-12	645	Hylpoe
Harpia	17	7, 400	2017-02-19	630	Hylpoe
Harpia	17	7, 400	2017-02-19	645	Hylpoe
Harpia	17	8, 200	2017-02-15	615	Hylpoe
Harpia	17	8, 600	2017-02-20	615	Hylpoe
Harpia	17	9, -50	2017-02-12	600	Hylpoe
Harpia	17	9, 400	2017-02-19	645	Hylpoe
Harpia	17	9, 800	2017-02-23	600	Hylpoe
Harpia	17	9, 800	2017-02-23	615	Hylpoe
Harpia	17	9, 800	2017-02-23	730	Hylpoe
Harpia	17	10, 200	2017-02-15	615	Hylpoe
Harpia	17	10, 200	2017-02-15	700	Hylpoe
Harpia	17	2, 600	2017-02-20	600	Hylsub
Harpia	17	3, -50	2017-02-12	600	Hylsub
Harpia	17	4, 200	2017-02-15	615	Hylsub
Harpia	17	4, 600	2017-02-20	600	Hylsub
Harpia	17	7, 800	2017-02-23	645	Hylsub
Harpia	17	7, 800	2017-02-23	800	Hylsub
Harpia	17	1, -50	2017-02-12	645	Hypcan
Harpia	17	1, -50	2017-02-12	700	Hypcan
Harpia	17	1, -50	2017-02-12	715	Hypcan
Harpia	17	1, -50	2017-02-12	730	Hypcan
Harpia	17	1, -50	2017-02-12	745	Hypcan
Harpia	17	1, -50	2017-02-12	800	Hypcan
Harpia	17	2, 600	2017-02-20	800	Hypcan
Harpia	17	3, -50	2017-02-12	630	Hypcan
Harpia	17	3, 400	2017-02-19	600	Hypcan
Harpia	17	3, 400	2017-02-19	615	Hypcan
Harpia	17	3, 400	2017-02-19	630	Hypcan
Harpia	17	3, 400	2017-02-19	645	Hypcan
Harpia	17	3, 400	2017-02-19	700	Hypcan
Harpia	17	3, 400	2017-02-19	715	Hypcan
Harpia	17	3, 800	2017-02-23	630	Hypcan
Harpia	17	3, 800	2017-02-23	645	Hypcan
Harpia	17	3, 800	2017-02-24	730	Hypcan
Harpia	17	4, 200	2017-02-15	745	Hypcan
Harpia	17	4, 600	2017-02-20	700	Hypcan
Harpia	17	4, 600	2017-02-20	715	Hypcan
Harpia	17	5, 400	2017-02-19	715	Hypcan
Harpia	17	5, 400	2017-02-19	730	Hypcan
Harpia	17	5, 800	2017-02-23	600	Hypcan
Harpia	17	5, 800	2017-02-24	615	Hypcan
Harpia	17	5, 800	2017-02-24	745	Hypcan
Harpia	17	5, 800	2017-02-24	800	Hypcan
Harpia	17	7, -50	2017-02-12	800	Hypcan
Harpia	17	7, 400	2017-02-19	645	Hypcan
Harpia	17	7, 400	2017-02-19	715	Hypcan
Harpia	17	7, 400	2017-02-19	730	Hypcan
Harpia	17	7, 400	2017-02-19	800	Hypcan
Harpia	17	7, 800	2017-02-23	615	Hypcan
Harpia	17	8, 600	2017-02-20	600	Hypcan
Harpia	17	8, 600	2017-02-20	615	Hypcan
Harpia	17	8, 600	2017-02-20	630	Hypcan
Harpia	17	8, 600	2017-02-20	645	Hypcan
Harpia	17	8, 600	2017-02-20	700	Hypcan
Harpia	17	8, 600	2017-02-20	715	Hypcan
Harpia	17	8, 600	2017-02-20	730	Hypcan
Harpia	17	8, 600	2017-02-20	745	Hypcan
Harpia	17	8, 600	2017-02-20	800	Hypcan
Harpia	17	9, -50	2017-02-12	600	Hypcan
Harpia	17	9, -50	2017-02-12	615	Hypcan
Harpia	17	9, -50	2017-02-12	630	Hypcan
Harpia	17	9, -50	2017-02-12	645	Hypcan
Harpia	17	9, -50	2017-02-12	700	Hypcan
Harpia	17	9, -50	2017-02-12	715	Hypcan
Harpia	17	9, -50	2017-02-12	730	Hypcan
Harpia	17	9, -50	2017-02-12	745	Hypcan
Harpia	17	9, -50	2017-02-12	800	Hypcan
Harpia	17	9, 400	2017-02-19	615	Hypcan
Harpia	17	9, 800	2017-02-23	645	Hypcan
Harpia	17	9, 800	2017-02-23	700	Hypcan
Harpia	17	9, 800	2017-02-23	715	Hypcan
Harpia	17	9, 800	2017-02-23	730	Hypcan
Harpia	17	9, 800	2017-02-23	745	Hypcan
Harpia	17	9, 800	2017-02-23	800	Hypcan
Harpia	17	10, 200	2017-02-15	645	Hypcan
Harpia	17	10, 200	2017-02-15	715	Hypcan
Harpia	17	10, 200	2017-02-15	730	Hypcan
Harpia	17	10, 200	2017-02-15	745	Hypcan
Harpia	17	10, 200	2017-02-15	800	Hypcan
Harpia	17	10, 600	2017-02-20	600	Hypcan
Harpia	17	10, 600	2017-02-20	615	Hypcan
Harpia	17	3, 400	2017-02-19	730	Hyphyp
Harpia	17	3, 400	2017-02-19	745	Hyphyp
Harpia	17	3, 800	2017-02-23	600	Hyphyp
Harpia	17	4, 200	2017-02-15	630	Hyphyp
Harpia	17	6, 200	2017-02-15	630	Hyphyp
Harpia	17	8, 200	2017-02-15	600	Hyphyp
Harpia	17	8, 200	2017-02-15	615	Hyphyp
Harpia	17	8, 200	2017-02-15	630	Hyphyp
Harpia	17	8, 200	2017-02-15	645	Hyphyp
Harpia	17	8, 200	2017-02-15	700	Hyphyp
Harpia	17	8, 200	2017-02-15	730	Hyphyp
Harpia	17	8, 200	2017-02-15	745	Hyphyp
Harpia	17	8, 200	2017-02-15	800	Hyphyp
Harpia	17	9, 400	2017-02-19	600	Hyphyp
Harpia	17	9, 400	2017-02-19	630	Hyphyp
Harpia	17	9, 400	2017-02-19	645	Hyphyp
Harpia	17	9, 400	2017-02-19	700	Hyphyp
Harpia	17	9, 400	2017-02-19	745	Hyphyp
Harpia	17	9, 400	2017-02-19	800	Hyphyp
Harpia	17	1, -50	2017-02-12	600	Jacaur
Harpia	17	1, -50	2017-02-12	630	Jacaur
Harpia	17	1, -50	2017-02-12	645	Jacaur
Harpia	17	1, -50	2017-02-12	745	Jacaur
Harpia	17	1, 400	2017-02-19	600	Jacaur
Harpia	17	2, 600	2017-02-20	745	Jacaur
Harpia	17	3, 400	2017-02-19	545	Jacaur
Harpia	17	3, 400	2017-02-19	600	Jacaur
Harpia	17	3, 800	2017-02-24	730	Jacaur
Harpia	17	4, 600	2017-02-20	730	Jacaur
Harpia	17	4, 600	2017-02-20	745	Jacaur
Harpia	17	5, 400	2017-02-19	545	Jacaur
Harpia	17	6, 600	2017-02-20	545	Jacaur
Harpia	17	6, 600	2017-02-20	600	Jacaur
Harpia	17	6, 600	2017-02-20	715	Jacaur
Harpia	17	7, -50	2017-02-12	600	Jacaur
Harpia	17	7, -50	2017-02-12	615	Jacaur
Harpia	17	7, -50	2017-02-12	730	Jacaur
Harpia	17	7, -50	2017-02-12	745	Jacaur
Harpia	17	8, 600	2017-02-20	600	Jacaur
Harpia	17	8, 600	2017-02-20	800	Jacaur
Harpia	17	9, 400	2017-02-19	600	Jacaur
Harpia	17	10, 200	2017-02-15	800	Jacaur
Harpia	17	10, 600	2017-02-20	600	Jacaur
Harpia	17	10, 600	2017-02-20	645	Jacaur
Harpia	17	10, 600	2017-02-20	730	Jacaur
Harpia	17	1, 800	2017-02-23	615	Lanhyp
Harpia	17	8, 200	2017-02-15	700	Lanhyp
Harpia	17	4, 600	2017-02-20	645	Legleu
Harpia	17	4, 600	2017-02-20	700	Legleu
Harpia	17	4, 600	2017-02-20	715	Legleu
Harpia	17	5, 800	2017-02-23	600	Legleu
Harpia	17	5, 800	2017-02-24	615	Legleu
Harpia	17	7, 800	2017-02-23	615	Legleu
Harpia	17	7, 800	2017-02-23	630	Legleu
Harpia	17	7, 800	2017-02-23	700	Legleu
Harpia	17	7, 800	2017-02-23	715	Legleu
Harpia	17	7, 800	2017-02-23	730	Legleu
Harpia	17	7, 800	2017-02-23	745	Legleu
Harpia	17	7, 800	2017-02-23	800	Legleu
Harpia	17	8, 600	2017-02-20	730	Legleu
Harpia	17	9, 800	2017-02-23	730	Legleu
Harpia	17	9, 800	2017-02-23	800	Legleu
Harpia	17	5, 800	2017-02-24	645	Lepruf
Harpia	17	5, 800	2017-02-24	715	Lepruf
Harpia	17	5, 800	2017-02-24	730	Lepruf
Harpia	17	5, 800	2017-02-24	745	Lepruf
Harpia	17	1, 800	2017-02-23	730	Liotho
Harpia	17	3, -50	2017-02-12	615	Liotho
Harpia	17	3, -50	2017-02-12	630	Liotho
Harpia	17	4, 200	2017-02-15	630	Liotho
Harpia	17	4, 600	2017-02-20	715	Liotho
Harpia	17	5, 400	2017-02-19	615	Liotho
Harpia	17	5, 400	2017-02-19	630	Liotho
Harpia	17	5, 400	2017-02-19	630	Liotho
Harpia	17	5, 400	2017-02-19	645	Liotho
Harpia	17	5, 400	2017-02-19	700	Liotho
Harpia	17	5, 400	2017-02-19	715	Liotho
Harpia	17	5, 400	2017-02-19	730	Liotho
Harpia	17	5, 400	2017-02-19	745	Liotho
Harpia	17	5, 800	2017-02-24	615	Liotho
Harpia	17	5, 800	2017-02-24	730	Liotho
Harpia	17	5, 800	2017-02-24	745	Liotho
Harpia	17	6, 200	2017-02-15	600	Liotho
Harpia	17	6, 200	2017-02-15	615	Liotho
Harpia	17	6, 200	2017-02-15	630	Liotho
Harpia	17	6, 200	2017-02-15	645	Liotho
Harpia	17	6, 200	2017-02-15	715	Liotho
Harpia	17	6, 600	2017-02-20	645	Liotho
Harpia	17	6, 600	2017-02-20	700	Liotho
Harpia	17	6, 600	2017-02-20	800	Liotho
Harpia	17	7, -50	2017-02-12	615	Liotho
Harpia	17	7, -50	2017-02-12	715	Liotho
Harpia	17	7, -50	2017-02-12	730	Liotho
Harpia	17	7, -50	2017-02-12	800	Liotho
Harpia	17	7, 400	2017-02-19	600	Liotho
Harpia	17	7, 400	2017-02-19	615	Liotho
Harpia	17	7, 400	2017-02-19	630	Liotho
Harpia	17	7, 400	2017-02-19	645	Liotho
Harpia	17	7, 400	2017-02-19	700	Liotho
Harpia	17	7, 400	2017-02-19	715	Liotho
Harpia	17	7, 400	2017-02-19	730	Liotho
Harpia	17	7, 400	2017-02-19	745	Liotho
Harpia	17	7, 400	2017-02-19	800	Liotho
Harpia	17	7, 800	2017-02-23	600	Liotho
Harpia	17	7, 800	2017-02-23	615	Liotho
Harpia	17	7, 800	2017-02-23	630	Liotho
Harpia	17	7, 800	2017-02-23	645	Liotho
Harpia	17	7, 800	2017-02-23	700	Liotho
Harpia	17	7, 800	2017-02-23	715	Liotho
Harpia	17	7, 800	2017-02-23	730	Liotho
Harpia	17	7, 800	2017-02-23	745	Liotho
Harpia	17	7, 800	2017-02-23	800	Liotho
Harpia	17	8, 200	2017-02-15	630	Liotho
Harpia	17	8, 600	2017-02-20	600	Liotho
Harpia	17	9, -50	2017-02-12	630	Liotho
Harpia	17	9, -50	2017-02-12	645	Liotho
Harpia	17	9, -50	2017-02-12	700	Liotho
Harpia	17	9, -50	2017-02-12	715	Liotho
Harpia	17	9, -50	2017-02-12	730	Liotho
Harpia	17	9, -50	2017-02-12	745	Liotho
Harpia	17	9, -50	2017-02-12	800	Liotho
Harpia	17	9, 400	2017-02-19	600	Liotho
Harpia	17	9, 400	2017-02-19	615	Liotho
Harpia	17	9, 400	2017-02-19	630	Liotho
Harpia	17	9, 400	2017-02-19	730	Liotho
Harpia	17	9, 400	2017-02-19	745	Liotho
Harpia	17	9, 400	2017-02-19	800	Liotho
Harpia	17	9, 800	2017-02-23	600	Liotho
Harpia	17	9, 800	2017-02-23	615	Liotho
Harpia	17	9, 800	2017-02-23	630	Liotho
Harpia	17	9, 800	2017-02-23	645	Liotho
Harpia	17	9, 800	2017-02-23	700	Liotho
Harpia	17	9, 800	2017-02-23	715	Liotho
Harpia	17	9, 800	2017-02-23	730	Liotho
Harpia	17	9, 800	2017-02-23	745	Liotho
Harpia	17	9, 800	2017-02-23	800	Liotho
Harpia	17	10, 200	2017-02-15	630	Liotho
Harpia	17	10, 200	2017-02-15	645	Liotho
Harpia	17	10, 200	2017-02-15	700	Liotho
Harpia	17	10, 200	2017-02-15	715	Liotho
Harpia	17	10, 200	2017-02-15	730	Liotho
Harpia	17	10, 200	2017-02-15	745	Liotho
Harpia	17	10, 200	2017-02-15	800	Liotho
Harpia	17	4, 200	2017-02-15	615	Lipvoc
Harpia	17	4, 200	2017-02-15	630	Lipvoc
Harpia	17	4, 200	2017-02-15	645	Lipvoc
Harpia	17	5, -50	2017-02-12	615	Lipvoc
Harpia	17	5, -50	2017-02-12	630	Lipvoc
Harpia	17	5, -50	2017-02-12	645	Lipvoc
Harpia	17	5, -50	2017-02-12	715	Lipvoc
Harpia	17	5, 400	2017-02-19	600	Lipvoc
Harpia	17	5, 400	2017-02-19	615	Lipvoc
Harpia	17	5, 400	2017-02-19	630	Lipvoc
Harpia	17	5, 400	2017-02-19	645	Lipvoc
Harpia	17	5, 400	2017-02-19	700	Lipvoc
Harpia	17	5, 400	2017-02-19	715	Lipvoc
Harpia	17	6, 200	2017-02-15	600	Lipvoc
Harpia	17	6, 200	2017-02-15	615	Lipvoc
Harpia	17	6, 200	2017-02-15	630	Lipvoc
Harpia	17	6, 200	2017-02-15	645	Lipvoc
Harpia	17	6, 200	2017-02-15	700	Lipvoc
Harpia	17	6, 200	2017-02-15	715	Lipvoc
Harpia	17	6, 200	2017-02-15	800	Lipvoc
Harpia	17	6, 600	2017-02-20	600	Lipvoc
Harpia	17	6, 600	2017-02-20	800	Lipvoc
Harpia	17	7, -50	2017-02-12	600	Lipvoc
Harpia	17	7, -50	2017-02-12	615	Lipvoc
Harpia	17	7, -50	2017-02-12	630	Lipvoc
Harpia	17	7, -50	2017-02-12	645	Lipvoc
Harpia	17	7, -50	2017-02-12	715	Lipvoc
Harpia	17	7, -50	2017-02-12	730	Lipvoc
Harpia	17	7, -50	2017-02-12	745	Lipvoc
Harpia	17	7, -50	2017-02-12	800	Lipvoc
Harpia	17	7, 400	2017-02-19	600	Lipvoc
Harpia	17	7, 400	2017-02-19	615	Lipvoc
Harpia	17	7, 400	2017-02-19	630	Lipvoc
Harpia	17	7, 400	2017-02-19	645	Lipvoc
Harpia	17	7, 400	2017-02-19	700	Lipvoc
Harpia	17	7, 400	2017-02-19	715	Lipvoc
Harpia	17	7, 400	2017-02-19	730	Lipvoc
Harpia	17	7, 400	2017-02-19	800	Lipvoc
Harpia	17	8, 200	2017-02-15	600	Lipvoc
Harpia	17	8, 200	2017-02-15	615	Lipvoc
Harpia	17	8, 200	2017-02-15	630	Lipvoc
Harpia	17	8, 200	2017-02-15	645	Lipvoc
Harpia	17	8, 200	2017-02-15	700	Lipvoc
Harpia	17	8, 200	2017-02-15	715	Lipvoc
Harpia	17	8, 200	2017-02-15	800	Lipvoc
Harpia	17	8, 600	2017-02-20	600	Lipvoc
Harpia	17	8, 600	2017-02-20	615	Lipvoc
Harpia	17	9, -50	2017-02-12	615	Lipvoc
Harpia	17	9, -50	2017-02-12	630	Lipvoc
Harpia	17	9, -50	2017-02-12	645	Lipvoc
Harpia	17	9, -50	2017-02-12	730	Lipvoc
Harpia	17	9, -50	2017-02-12	745	Lipvoc
Harpia	17	9, -50	2017-02-12	800	Lipvoc
Harpia	17	9, 400	2017-02-19	645	Lipvoc
Harpia	17	9, 400	2017-02-19	700	Lipvoc
Harpia	17	9, 400	2017-02-19	745	Lipvoc
Harpia	17	9, 400	2017-02-19	800	Lipvoc
Harpia	17	9, 800	2017-02-23	600	Lipvoc
Harpia	17	9, 800	2017-02-23	745	Lipvoc
Harpia	17	9, 800	2017-02-23	800	Lipvoc
Harpia	17	10, 200	2017-02-15	615	Lipvoc
Harpia	17	10, 200	2017-02-15	730	Lipvoc
Harpia	17	10, 200	2017-02-15	800	Lipvoc
Harpia	17	1, -50	2017-02-12	545	Lopcri
Harpia	17	1, 400	2017-02-19	545	Lopcri
Harpia	17	2, 200	2017-02-15	545	Lopcri
Harpia	17	2, 600	2017-02-20	545	Lopcri
Harpia	17	3, -50	2017-02-12	545	Lopcri
Harpia	17	4, 200	2017-02-15	545	Lopcri
Harpia	17	4, 600	2017-02-20	545	Lopcri
Harpia	17	5, -50	2017-02-12	545	Lopcri
Harpia	17	6, 200	2017-02-15	545	Lopcri
Harpia	17	6, 600	2017-02-20	545	Lopcri
Harpia	17	7, -50	2017-02-12	545	Lopcri
Harpia	17	7, 800	2017-02-23	545	Lopcri
Harpia	17	8, 200	2017-02-15	545	Lopcri
Harpia	17	9, -50	2017-02-12	545	Lopcri
Harpia	17	1, -50	2017-02-12	700	Lopvit
Harpia	17	1, -50	2017-02-12	715	Lopvit
Harpia	17	1, -50	2017-02-12	730	Lopvit
Harpia	17	4, 600	2017-02-20	615	Lopvit
Harpia	17	1, -50	2017-02-12	745	Macreg
Harpia	17	1, -50	2017-02-12	800	Macreg
Harpia	17	2, 200	2017-02-15	615	Macreg
Harpia	17	2, 200	2017-02-15	630	Macreg
Harpia	17	2, 200	2017-02-15	645	Macreg
Harpia	17	2, 200	2017-02-15	700	Macreg
Harpia	17	2, 200	2017-02-15	715	Macreg
Harpia	17	2, 200	2017-02-15	745	Macreg
Harpia	17	2, 200	2017-02-15	800	Macreg
Harpia	17	2, 600	2017-02-20	800	Macreg
Harpia	17	5, -50	2017-02-12	645	Macreg
Harpia	17	2, 200	2017-02-15	630	Malfus
Harpia	17	2, 200	2017-02-15	645	Malfus
Harpia	17	7, -50	2017-02-12	600	Malfus
Harpia	17	7, -50	2017-02-12	615	Malfus
Harpia	17	7, -50	2017-02-12	630	Malfus
Harpia	17	7, -50	2017-02-12	645	Malfus
Harpia	17	9, 800	2017-02-23	600	Malfus
Harpia	17	1, -50	2017-02-12	745	Melcru
Harpia	17	1, 400	2017-02-17	630	Melcru
Harpia	17	1, 400	2017-02-17	715	Melcru
Harpia	17	3, -50	2017-02-12	745	Melcru
Harpia	17	3, 400	2017-02-19	715	Melcru
Harpia	17	4, 600	2017-02-20	715	Melcru
Harpia	17	8, 600	2017-02-20	700	Melcru
Harpia	17	9, 800	2017-02-23	645	Melcru
Harpia	17	10, 600	2017-02-20	745	Melcru
Harpia	17	6, 600	2017-02-20	630	Miccin
Harpia	17	6, 600	2017-02-20	645	Miccin
Harpia	17	6, 600	2017-02-20	700	Miccin
Harpia	17	6, 600	2017-02-20	715	Miccin
Harpia	17	9, 400	2017-02-19	800	Miccin
Harpia	17	1, -50	2017-02-12	545	Micgil
Harpia	17	1, -50	2017-02-12	600	Micgil
Harpia	17	2, 200	2017-02-15	545	Micgil
Harpia	17	3, -50	2017-02-12	545	Micgil
Harpia	17	3, -50	2017-02-12	600	Micgil
Harpia	17	4, 200	2017-02-15	545	Micgil
Harpia	17	4, 600	2017-02-20	545	Micgil
Harpia	17	5, 800	2017-02-23	545	Micgil
Harpia	17	6, 200	2017-02-15	545	Micgil
Harpia	17	6, 600	2017-02-20	545	Micgil
Harpia	17	7, 400	2017-02-19	545	Micgil
Harpia	17	8, 600	2017-02-20	545	Micgil
Harpia	17	9, 400	2017-02-19	545	Micgil
Harpia	17	9, 800	2017-02-23	545	Micgil
Harpia	17	9, 800	2017-02-23	600	Micgil
Harpia	17	10, 600	2017-02-20	545	Micgil
Harpia	17	5, 400	2017-02-19	715	Micmar
Harpia	17	5, 400	2017-02-19	730	Micmar
Harpia	17	8, 600	2017-02-20	615	Micmar
Harpia	17	8, 600	2017-02-20	700	Micmar
Harpia	17	9, 800	2017-02-23	800	Micmar
Harpia	17	3, -50	2017-02-12	545	Micruf
Harpia	17	2, 600	2017-02-20	730	Mioole
Harpia	17	2, 600	2017-02-20	800	Mioole
Harpia	17	2, 200	2017-02-15	800	Mitsal
Harpia	17	3, -50	2017-02-12	545	Mitsal
Harpia	17	3, 400	2017-02-19	545	Mitsal
Harpia	17	3, 800	2017-02-23	545	Mitsal
Harpia	17	5, -50	2017-02-12	545	Mitsal
Harpia	17	7, -50	2017-02-12	545	Mitsal
Harpia	17	5, 400	2017-02-19	745	Monmor
Harpia	17	5, 400	2017-02-19	800	Monmor
Harpia	17	7, -50	2017-02-12	700	Monmor
Harpia	17	7, 800	2017-02-23	715	Monmor
Harpia	17	7, 800	2017-02-23	730	Monmor
Harpia	17	9, 400	2017-02-19	615	Monmor
Harpia	17	9, 400	2017-02-19	645	Monmor
Harpia	17	1, -50	2017-02-12	600	Myigai
Harpia	17	2, 600	2017-02-20	745	Myigai
Harpia	17	2, 600	2017-02-20	800	Myigai
Harpia	17	8, 200	2017-02-15	745	Myigai
Harpia	17	9, 400	2017-02-19	615	Myigai
Harpia	17	10, 600	2017-02-20	730	Myigai
Harpia	17	2, 600	2017-02-20	745	Myigra
Harpia	17	3, 400	2017-02-19	630	Myitub
Harpia	17	6, 600	2017-02-20	615	Myitub
Harpia	17	6, 600	2017-02-20	700	Myitub
Harpia	17	7, -50	2017-02-12	700	Myitub
Harpia	17	7, 800	2017-02-23	800	Myitub
Harpia	17	8, 200	2017-02-15	615	Myitub
Harpia	17	8, 200	2017-02-15	630	Myitub
Harpia	17	8, 200	2017-02-15	715	Myitub
Harpia	17	8, 600	2017-02-20	630	Myitub
Harpia	17	8, 600	2017-02-20	700	Myitub
Harpia	17	8, 600	2017-02-20	715	Myitub
Harpia	17	8, 600	2017-02-20	730	Myitub
Harpia	17	9, 400	2017-02-19	715	Myitub
Harpia	17	9, 400	2017-02-19	745	Myitub
Harpia	17	9, 400	2017-02-19	800	Myitub
Harpia	17	10, 200	2017-02-15	600	Myitub
Harpia	17	2, 600	2017-02-20	600	Myraxi
Harpia	17	2, 600	2017-02-20	615	Myraxi
Harpia	17	3, -50	2017-02-12	600	Myraxi
Harpia	17	3, 400	2017-02-19	600	Myraxi
Harpia	17	3, 400	2017-02-19	615	Myraxi
Harpia	17	3, 400	2017-02-19	630	Myraxi
Harpia	17	3, 400	2017-02-19	645	Myraxi
Harpia	17	4, 600	2017-02-20	600	Myraxi
Harpia	17	4, 600	2017-02-20	615	Myraxi
Harpia	17	4, 600	2017-02-20	630	Myraxi
Harpia	17	5, 400	2017-02-19	600	Myraxi
Harpia	17	5, 400	2017-02-19	615	Myraxi
Harpia	17	5, 400	2017-02-19	630	Myraxi
Harpia	17	5, 400	2017-02-19	645	Myraxi
Harpia	17	6, 200	2017-02-15	630	Myraxi
Harpia	17	6, 600	2017-02-20	600	Myraxi
Harpia	17	7, -50	2017-02-12	600	Myraxi
Harpia	17	7, 400	2017-02-19	600	Myraxi
Harpia	17	9, 400	2017-02-19	615	Myraxi
Harpia	17	9, 400	2017-02-19	800	Myraxi
Harpia	17	10, 200	2017-02-15	615	Myraxi
Harpia	17	10, 200	2017-02-15	630	Myraxi
Harpia	17	1, -50	2017-02-12	700	Myrbra
Harpia	17	1, -50	2017-02-12	745	Myrbra
Harpia	17	1, -50	2017-02-12	800	Myrbra
Harpia	17	1, 800	2017-02-23	615	Myrbra
Harpia	17	1, 800	2017-02-23	645	Myrbra
Harpia	17	1, 800	2017-02-23	715	Myrbra
Harpia	17	3, 400	2017-02-19	745	Myrbra
Harpia	17	3, 800	2017-02-23	630	Myrbra
Harpia	17	3, 800	2017-02-23	700	Myrbra
Harpia	17	3, 800	2017-02-23	715	Myrbra
Harpia	17	3, 800	2017-02-24	730	Myrbra
Harpia	17	3, 800	2017-02-24	745	Myrbra
Harpia	17	3, 800	2017-02-24	800	Myrbra
Harpia	17	4, 200	2017-02-15	615	Myrbra
Harpia	17	4, 600	2017-02-20	615	Myrbra
Harpia	17	4, 600	2017-02-20	630	Myrbra
Harpia	17	4, 600	2017-02-20	645	Myrbra
Harpia	17	4, 600	2017-02-20	700	Myrbra
Harpia	17	4, 600	2017-02-20	715	Myrbra
Harpia	17	4, 600	2017-02-20	730	Myrbra
Harpia	17	4, 600	2017-02-20	800	Myrbra
Harpia	17	5, 400	2017-02-19	600	Myrbra
Harpia	17	5, 400	2017-02-19	615	Myrbra
Harpia	17	5, 400	2017-02-19	630	Myrbra
Harpia	17	5, 400	2017-02-19	645	Myrbra
Harpia	17	6, 200	2017-02-15	615	Myrbra
Harpia	17	6, 600	2017-02-20	615	Myrbra
Harpia	17	6, 600	2017-02-20	630	Myrbra
Harpia	17	6, 600	2017-02-20	645	Myrbra
Harpia	17	6, 600	2017-02-20	700	Myrbra
Harpia	17	6, 600	2017-02-20	715	Myrbra
Harpia	17	6, 600	2017-02-20	745	Myrbra
Harpia	17	6, 600	2017-02-20	800	Myrbra
Harpia	17	7, -50	2017-02-12	615	Myrbra
Harpia	17	7, -50	2017-02-12	700	Myrbra
Harpia	17	7, -50	2017-02-12	715	Myrbra
Harpia	17	7, -50	2017-02-12	730	Myrbra
Harpia	17	7, -50	2017-02-12	745	Myrbra
Harpia	17	8, 200	2017-02-15	645	Myrbra
Harpia	17	8, 600	2017-02-20	615	Myrbra
Harpia	17	8, 600	2017-02-20	630	Myrbra
Harpia	17	8, 600	2017-02-20	645	Myrbra
Harpia	17	8, 600	2017-02-20	700	Myrbra
Harpia	17	8, 600	2017-02-20	715	Myrbra
Harpia	17	8, 600	2017-02-20	730	Myrbra
Harpia	17	8, 600	2017-02-20	800	Myrbra
Harpia	17	9, -50	2017-02-12	630	Myrbra
Harpia	17	9, -50	2017-02-12	645	Myrbra
Harpia	17	9, -50	2017-02-12	730	Myrbra
Harpia	17	9, -50	2017-02-12	745	Myrbra
Harpia	17	9, -50	2017-02-12	800	Myrbra
Harpia	17	9, 400	2017-02-19	600	Myrbra
Harpia	17	9, 400	2017-02-19	645	Myrbra
Harpia	17	9, 400	2017-02-19	745	Myrbra
Harpia	17	9, 400	2017-02-19	800	Myrbra
Harpia	17	10, 200	2017-02-15	645	Myrbra
Harpia	17	10, 200	2017-02-15	700	Myrbra
Harpia	17	10, 200	2017-02-15	715	Myrbra
Harpia	17	10, 200	2017-02-15	745	Myrbra
Harpia	17	10, 200	2017-02-15	800	Myrbra
Harpia	17	10, 600	2017-02-20	645	Myrbra
Harpia	17	10, 600	2017-02-20	700	Myrbra
Harpia	17	10, 600	2017-02-20	715	Myrbra
Harpia	17	10, 600	2017-02-20	730	Myrbra
Harpia	17	10, 600	2017-02-20	745	Myrbra
Harpia	17	1, -50	2017-02-12	630	Myrcam
Harpia	17	1, -50	2017-02-12	645	Myrcam
Harpia	17	1, -50	2017-02-12	700	Myrcam
Harpia	17	1, -50	2017-02-12	715	Myrcam
Harpia	17	1, -50	2017-02-12	745	Myrcam
Harpia	17	1, -50	2017-02-12	800	Myrcam
Harpia	17	1, 400	2017-02-19	600	Myrcam
Harpia	17	1, 400	2017-02-19	730	Myrcam
Harpia	17	1, 400	2017-02-19	745	Myrcam
Harpia	17	1, 400	2017-02-19	800	Myrcam
Harpia	17	2, 200	2017-02-15	600	Myrcam
Harpia	17	2, 200	2017-02-15	615	Myrcam
Harpia	17	2, 200	2017-02-15	630	Myrcam
Harpia	17	2, 200	2017-02-15	700	Myrcam
Harpia	17	2, 200	2017-02-15	715	Myrcam
Harpia	17	2, 200	2017-02-15	800	Myrcam
Harpia	17	2, 600	2017-02-20	600	Myrcam
Harpia	17	3, -50	2017-02-12	600	Myrcam
Harpia	17	3, -50	2017-02-12	615	Myrcam
Harpia	17	3, -50	2017-02-12	630	Myrcam
Harpia	17	3, -50	2017-02-12	645	Myrcam
Harpia	17	3, -50	2017-02-12	700	Myrcam
Harpia	17	3, -50	2017-02-12	715	Myrcam
Harpia	17	3, -50	2017-02-12	730	Myrcam
Harpia	17	3, -50	2017-02-12	745	Myrcam
Harpia	17	3, -50	2017-02-12	800	Myrcam
Harpia	17	3, 400	2017-02-19	545	Myrcam
Harpia	17	3, 400	2017-02-19	600	Myrcam
Harpia	17	3, 400	2017-02-19	615	Myrcam
Harpia	17	3, 400	2017-02-19	630	Myrcam
Harpia	17	3, 400	2017-02-19	645	Myrcam
Harpia	17	3, 400	2017-02-19	700	Myrcam
Harpia	17	3, 400	2017-02-19	715	Myrcam
Harpia	17	3, 400	2017-02-19	730	Myrcam
Harpia	17	3, 400	2017-02-19	800	Myrcam
Harpia	17	4, 200	2017-02-16	600	Myrcam
Harpia	17	4, 200	2017-02-15	615	Myrcam
Harpia	17	4, 200	2017-02-15	630	Myrcam
Harpia	17	4, 200	2017-02-15	645	Myrcam
Harpia	17	4, 200	2017-02-15	715	Myrcam
Harpia	17	4, 200	2017-02-15	730	Myrcam
Harpia	17	4, 200	2017-02-15	800	Myrcam
Harpia	17	5, -50	2017-02-12	615	Myrcam
Harpia	17	5, -50	2017-02-12	700	Myrcam
Harpia	17	5, -50	2017-02-12	715	Myrcam
Harpia	17	5, -50	2017-02-12	730	Myrcam
Harpia	17	5, -50	2017-02-12	745	Myrcam
Harpia	17	5, -50	2017-02-12	800	Myrcam
Harpia	17	5, 800	2017-02-24	630	Myrcam
Harpia	17	5, 800	2017-02-24	645	Myrcam
Harpia	17	5, 800	2017-02-24	700	Myrcam
Harpia	17	5, 800	2017-02-24	745	Myrcam
Harpia	17	6, 200	2017-02-15	600	Myrcam
Harpia	17	6, 200	2017-02-15	630	Myrcam
Harpia	17	7, -50	2017-02-12	600	Myrcam
Harpia	17	7, -50	2017-02-12	645	Myrcam
Harpia	17	7, -50	2017-02-12	730	Myrcam
Harpia	17	7, -50	2017-02-12	745	Myrcam
Harpia	17	7, -50	2017-02-12	800	Myrcam
Harpia	17	7, 400	2017-02-19	545	Myrcam
Harpia	17	8, 200	2017-02-15	715	Myrcam
Harpia	17	8, 600	2017-02-20	600	Myrcam
Harpia	17	8, 600	2017-02-20	615	Myrcam
Harpia	17	8, 600	2017-02-20	800	Myrcam
Harpia	17	9, -50	2017-02-12	600	Myrcam
Harpia	17	9, -50	2017-02-12	615	Myrcam
Harpia	17	9, -50	2017-02-12	630	Myrcam
Harpia	17	9, -50	2017-02-12	645	Myrcam
Harpia	17	9, -50	2017-02-12	700	Myrcam
Harpia	17	9, -50	2017-02-12	715	Myrcam
Harpia	17	9, -50	2017-02-12	730	Myrcam
Harpia	17	9, -50	2017-02-12	745	Myrcam
Harpia	17	9, 800	2017-02-23	715	Myrcam
Harpia	17	10, 600	2017-02-20	600	Myrcam
Harpia	17	3, 400	2017-02-19	645	Myrery
Harpia	17	3, 400	2017-02-19	700	Myrery
Harpia	17	3, 400	2017-02-19	645	Myrfje
Harpia	17	3, 400	2017-02-19	700	Myrfje
Harpia	17	3, -50	2017-02-12	630	Myrfor
Harpia	17	3, -50	2017-02-12	700	Myrfor
Harpia	17	5, -50	2017-02-12	645	Myrfor
Harpia	17	6, 600	2017-02-20	645	Myrfor
Harpia	17	6, 600	2017-02-20	700	Myrfor
Harpia	17	6, 600	2017-02-20	715	Myrfor
Harpia	17	6, 600	2017-02-20	730	Myrfor
Harpia	17	6, 600	2017-02-20	745	Myrfor
Harpia	17	6, 600	2017-02-20	800	Myrfor
Harpia	17	7, -50	2017-02-12	615	Myrfor
Harpia	17	7, -50	2017-02-12	645	Myrfor
Harpia	17	7, 800	2017-02-23	615	Myrfor
Harpia	17	9, 800	2017-02-23	715	Myrfor
Harpia	17	10, 200	2017-02-15	630	Myrfor
Harpia	17	5, 800	2017-02-24	630	Myrhau
Harpia	17	5, 800	2017-02-24	645	Myrhau
Harpia	17	5, 800	2017-02-24	715	Myrhau
Harpia	17	6, 200	2017-02-15	630	Myrhau
Harpia	17	10, 200	2017-02-15	630	Myrhau
Harpia	17	10, 200	2017-02-15	715	Myrhau
Harpia	17	10, 200	2017-02-15	745	Myrhau
Harpia	17	10, 200	2017-02-15	800	Myrhau
Harpia	17	7, -50	2017-02-12	700	Myrign
Harpia	17	7, -50	2017-02-12	715	Myrign
Harpia	17	7, -50	2017-02-12	730	Myrign
Harpia	17	7, -50	2017-02-12	745	Myrign
Harpia	17	8, 600	2017-02-20	630	Myrign
Harpia	17	8, 600	2017-02-20	645	Myrign
Harpia	17	2, 600	2017-02-20	700	Myrlon
Harpia	17	3, 400	2017-02-19	645	Myrlon
Harpia	17	3, 400	2017-02-19	700	Myrlon
Harpia	17	3, 400	2017-02-19	745	Myrlon
Harpia	17	3, 800	2017-02-23	615	Myrlon
Harpia	17	3, 800	2017-02-24	745	Myrlon
Harpia	17	6, 200	2017-02-15	615	Myrlon
Harpia	17	6, 200	2017-02-15	630	Myrlon
Harpia	17	3, 800	2017-02-24	745	Myrmen
Harpia	17	4, 600	2017-02-20	630	Myrmen
Harpia	17	7, 800	2017-02-23	630	Myrmen
Harpia	17	7, -50	2017-02-12	630	Myrmyo
Harpia	17	1, -50	2017-02-12	630	Myrmyo
Harpia	17	1, -50	2017-02-12	645	Myrmyo
Harpia	17	1, -50	2017-02-12	700	Myrmyo
Harpia	17	1, -50	2017-02-12	730	Myrmyo
Harpia	17	1, 400	2017-02-17	630	Myrmyo
Harpia	17	1, 400	2017-02-17	715	Myrmyo
Harpia	17	1, 800	2017-02-23	745	Myrmyo
Harpia	17	1, 800	2017-02-23	800	Myrmyo
Harpia	17	2, 200	2017-02-15	615	Myrmyo
Harpia	17	2, 200	2017-02-15	630	Myrmyo
Harpia	17	2, 200	2017-02-15	645	Myrmyo
Harpia	17	2, 200	2017-02-15	700	Myrmyo
Harpia	17	2, 200	2017-02-15	715	Myrmyo
Harpia	17	2, 200	2017-02-15	800	Myrmyo
Harpia	17	2, 600	2017-02-20	630	Myrmyo
Harpia	17	2, 600	2017-02-20	645	Myrmyo
Harpia	17	2, 600	2017-02-20	700	Myrmyo
Harpia	17	3, -50	2017-02-12	615	Myrmyo
Harpia	17	3, -50	2017-02-12	630	Myrmyo
Harpia	17	3, -50	2017-02-12	645	Myrmyo
Harpia	17	3, 400	2017-02-19	630	Myrmyo
Harpia	17	3, 400	2017-02-19	645	Myrmyo
Harpia	17	3, 400	2017-02-19	700	Myrmyo
Harpia	17	3, 400	2017-02-19	715	Myrmyo
Harpia	17	3, 400	2017-02-19	745	Myrmyo
Harpia	17	3, 400	2017-02-19	800	Myrmyo
Harpia	17	3, 800	2017-02-23	615	Myrmyo
Harpia	17	3, 800	2017-02-23	630	Myrmyo
Harpia	17	4, 200	2017-02-15	630	Myrmyo
Harpia	17	4, 200	2017-02-15	645	Myrmyo
Harpia	17	4, 200	2017-02-15	715	Myrmyo
Harpia	17	4, 200	2017-02-15	800	Myrmyo
Harpia	17	4, 600	2017-02-20	615	Myrmyo
Harpia	17	4, 600	2017-02-20	700	Myrmyo
Harpia	17	5, 400	2017-02-19	615	Myrmyo
Harpia	17	5, 400	2017-02-19	645	Myrmyo
Harpia	17	5, 400	2017-02-19	700	Myrmyo
Harpia	17	5, 400	2017-02-19	715	Myrmyo
Harpia	17	5, 400	2017-02-19	730	Myrmyo
Harpia	17	5, 400	2017-02-19	745	Myrmyo
Harpia	17	5, 400	2017-02-19	800	Myrmyo
Harpia	17	5, 800	2017-02-24	730	Myrmyo
Harpia	17	7, -50	2017-02-12	645	Myrmyo
Harpia	17	7, -50	2017-02-12	700	Myrmyo
Harpia	17	7, 400	2017-02-19	800	Myrmyo
Harpia	17	9, 800	2017-02-23	600	Myrmyo
Harpia	17	10, 600	2017-02-20	600	Myrmyo
Harpia	17	10, 600	2017-02-20	615	Myrmyo
Harpia	17	10, 600	2017-02-20	630	Myrmyo
Harpia	17	1, -50	2017-02-12	645	Nonbru
Harpia	17	5, -50	2017-02-12	630	Nonbru
Harpia	17	5, -50	2017-02-12	645	Nonbru
Harpia	17	5, -50	2017-02-12	700	Nonbru
Harpia	17	6, 600	2017-02-20	545	Nonbru
Harpia	17	10, 200	2017-02-15	700	Nonbru
Harpia	17	6, 600	2017-02-20	745	Notmac
Harpia	17	7, -50	2017-02-12	600	Notmac
Harpia	17	7, -50	2017-02-12	715	Notmac
Harpia	17	7, 800	2017-02-23	800	Notmac
Harpia	17	10, 200	2017-02-15	545	Noturu
Harpia	17	4, 600	2017-02-20	545	Nycaet
Harpia	17	7, 400	2017-02-19	545	Nycaet
Harpia	17	7, 800	2017-02-23	545	Nycaet
Harpia	17	9, 800	2017-02-23	545	Nycaet
Harpia	17	4, 200	2017-02-15	545	Nycgra
Harpia	17	6, 600	2017-02-20	545	Nycgri
Harpia	17	8, 600	2017-02-20	545	Nycgri
Harpia	17	5, 800	2017-02-23	545	Nycoce
Harpia	17	1, -50	2017-02-12	545	Otuwat
Harpia	17	1, 400	2017-02-19	545	Otuwat
Harpia	17	2, 200	2017-02-15	545	Otuwat
Harpia	17	3, -50	2017-02-12	545	Otuwat
Harpia	17	3, 400	2017-02-19	545	Otuwat
Harpia	17	3, 800	2017-02-23	600	Otuwat
Harpia	17	4, 200	2017-02-15	545	Otuwat
Harpia	17	4, 600	2017-02-20	545	Otuwat
Harpia	17	5, 400	2017-02-19	545	Otuwat
Harpia	17	6, 200	2017-02-15	545	Otuwat
Harpia	17	7, -50	2017-02-12	545	Otuwat
Harpia	17	7, 800	2017-02-23	545	Otuwat
Harpia	17	8, 200	2017-02-15	545	Otuwat
Harpia	17	8, 600	2017-02-20	545	Otuwat
Harpia	17	8, 600	2017-02-20	600	Otuwat
Harpia	17	9, -50	2017-02-12	545	Otuwat
Harpia	17	9, 800	2017-02-23	545	Otuwat
Harpia	17	9, 800	2017-02-23	600	Otuwat
Harpia	17	9, 800	2017-02-23	615	Otuwat
Harpia	17	10, 600	2017-02-20	545	Otuwat
Harpia	17	9, 400	2017-02-19	615	Pacmar
Harpia	17	2, 200	2017-02-15	545	Penjac
Harpia	17	2, 600	2017-02-20	545	Penjac
Harpia	17	3, 400	2017-02-19	545	Penjac
Harpia	17	6, 600	2017-02-20	645	Penjac
Harpia	17	7, -50	2017-02-12	545	Penjac
Harpia	17	9, -50	2017-02-12	545	Penjac
Harpia	17	9, 800	2017-02-23	600	Penjac
Harpia	17	7, -50	2017-02-12	730	Phiert
Harpia	17	7, 400	2017-02-19	700	Phiert
Harpia	17	7, 800	2017-02-23	600	Phiert
Harpia	17	7, 800	2017-02-23	615	Phiert
Harpia	17	7, 800	2017-02-23	630	Phiert
Harpia	17	7, 800	2017-02-23	645	Phiert
Harpia	17	8, 600	2017-02-20	730	Phiert
Harpia	17	8, 600	2017-02-20	745	Phiert
Harpia	17	9, 400	2017-02-19	615	Phiert
Harpia	17	9, 800	2017-02-23	615	Phiert
Harpia	17	9, 800	2017-02-23	630	Phiert
Harpia	17	3, 400	2017-02-19	645	Phiery
Harpia	17	7, 400	2017-02-19	630	Phipyr
Harpia	17	6, 600	2017-02-20	700	Phlery
Harpia	17	6, 600	2017-02-20	715	Phlery
Harpia	17	6, 600	2017-02-20	730	Phlery
Harpia	17	2, 600	2017-02-20	645	Phonig
Harpia	17	2, 600	2017-02-20	745	Phonig
Harpia	17	4, 600	2017-02-20	630	Phonig
Harpia	17	1, -50	2017-02-12	715	Piacay
Harpia	17	1, -50	2017-02-12	800	Piacay
Harpia	17	2, 200	2017-02-15	700	Piacay
Harpia	17	2, 200	2017-02-15	715	Piacay
Harpia	17	2, 200	2017-02-15	730	Piacay
Harpia	17	3, 400	2017-02-19	645	Piacay
Harpia	17	7, -50	2017-02-12	730	Piacay
Harpia	17	7, -50	2017-02-12	745	Piacay
Harpia	17	7, 800	2017-02-23	715	Piacay
Harpia	17	7, 800	2017-02-23	800	Piacay
Harpia	17	4, 600	2017-02-20	730	Picfla
Harpia	17	10, 600	2017-02-20	630	Picfla
Harpia	17	1, -50	2017-02-12	615	Piomel
Harpia	17	1, -50	2017-02-12	630	Piomel
[truncated: 1,099 more rows]

## Sheet: P2013
Plot	Year	Point	Date	Time	Species
Puma	13	0, 0	2013-03-03	545	Barmar
Puma	13	0, 0	2013-03-03	545	Otuwat
Puma	13	0, 0	2013-03-03	545	Penjac
Puma	13	0, 0	2013-03-03	545	Unk
Puma	13	0, 0	2013-03-03	545	Abucum
Puma	13	0, 0	2013-03-03	545	Tinmaj
Puma	13	0, 0	2013-03-03	545	Dapame
Puma	13	0, 0	2013-03-03	545	Unk
Puma	13	0, 0	2013-03-03	600	Barmar
Puma	13	0, 0	2013-03-03	600	Hypcan
Puma	13	0, 0	2013-03-03	600	Thrcor
Puma	13	0, 0	2013-03-03	600	Xipgut
Puma	13	0, 0	2013-03-03	600	Denruf
Puma	13	0, 0	2013-03-03	600	Unk
Puma	13	0, 0	2013-03-03	600	Cymlin
Puma	13	0, 0	2013-03-03	600	Xipspi
Puma	13	0, 0	2013-03-03	600	Unk
Puma	13	0, 0	2013-03-03	600	Thamur
Puma	13	0, 0	2013-03-03	600	Dapame
Puma	13	0, 0	2013-03-03	615	Cymlin
Puma	13	0, 0	2013-03-03	615	Thrcor
Puma	13	0, 0	2013-03-03	615	Myrmyo
Puma	13	0, 0	2013-03-03	615	Cercin
Puma	13	0, 0	2013-03-03	615	Brocya
Puma	13	0, 0	2013-03-03	615	Barmar
Puma	13	0, 0	2013-03-03	615	Unk
Puma	13	0, 0	2013-03-03	615	Hypcan
Puma	13	0, 0	2013-03-03	615	Xipspi
Puma	13	0, 0	2013-03-03	615	Ramtuc
Puma	13	0, 0	2013-03-03	630	Ramtuc
Puma	13	0, 0	2013-03-03	630	Myrmyo
Puma	13	0, 0	2013-03-03	630	Xipgut
Puma	13	0, 0	2013-03-03	630	Pipchl
Puma	13	0, 0	2013-03-03	630	Cymlin
Puma	13	0, 0	2013-03-03	630	Thrcor
Puma	13	0, 0	2013-03-03	630	Piomen
Puma	13	0, 0	2013-03-03	630	Unk
Puma	13	0, 0	2013-03-03	630	Capnig
Puma	13	0, 0	2013-03-03	645	Ramtuc
Puma	13	0, 0	2013-03-03	645	Cymlin
Puma	13	0, 0	2013-03-03	645	Xipgut
Puma	13	0, 0	2013-03-03	645	Ramvit
Puma	13	0, 0	2013-03-03	645	Amafar
Puma	13	0, 0	2013-03-03	645	Myrmyo
Puma	13	0, 0	2013-03-03	645	Hypcan
Puma	13	0, 0	2013-03-03	645	Myrbra
Puma	13	0, 0	2013-03-03	645	Unk
Puma	13	0, 0	2013-03-03	645	Cercin
Puma	13	0, 0	2013-03-03	700	Myrmyo
Puma	13	0, 0	2013-03-03	700	Cymlin
Puma	13	0, 0	2013-03-03	700	Rammel
Puma	13	0, 0	2013-03-03	700	Aramac
Puma	13	0, 0	2013-03-03	700	Amafar
Puma	13	0, 0	2013-03-03	700	Xipgut
Puma	13	0, 0	2013-03-03	700	Glyspi
Puma	13	0, 0	2013-03-03	700	Thamur
Puma	13	0, 0	2013-03-03	700	Cercin
Puma	13	0, 0	2013-03-03	715	Cymlin
Puma	13	0, 0	2013-03-03	715	Araara
Puma	13	0, 0	2013-03-03	715	Pitgro
Puma	13	0, 0	2013-03-03	715	Xipgut
Puma	13	0, 0	2013-03-03	715	Melcru
Puma	13	0, 0	2013-03-03	715	Myrbra
Puma	13	0, 0	2013-03-03	730	Cymlin
Puma	13	0, 0	2013-03-03	730	Pitgro
Puma	13	0, 0	2013-03-03	730	Micmar
Puma	13	0, 0	2013-03-03	730	Cammel
Puma	13	0, 0	2013-03-03	730	Cercin
Puma	13	0, 0	2013-03-03	730	Unk
Puma	13	0, 0	2013-03-03	730	Capnig
Puma	13	0, 0	2013-03-03	730	Xipgut
Puma	13	0, 0	2013-03-03	730	Myrmyo
Puma	13	0, 0	2013-03-03	730	Thrcor
Puma	13	0, 0	2013-03-03	730	Hylhyp
Puma	13	0, 0	2013-03-03	730	Myrbra
Puma	13	0, 0	2013-03-03	730	Melcru
Puma	13	0, 0	2013-03-03	745	Unk
Puma	13	0, 0	2013-03-03	745	Myrbra
Puma	13	0, 0	2013-03-03	745	Cymlin
Puma	13	0, 0	2013-03-03	745	Hylhyp
Puma	13	0, 0	2013-03-03	745	Pitgro
Puma	13	0, 0	2013-03-03	745	Unk
Puma	13	0, 0	2013-03-03	745	Chanob
Puma	13	0, 0	2013-03-03	745	Micmar
Puma	13	0, 0	2013-03-03	745	Liotho
Puma	13	0, 0	2013-03-03	745	Ramtuc
Puma	13	0, 0	2013-03-03	745	Hypcan
Puma	13	0, 0	2013-03-03	800	Myrmyo	loud noise
Puma	13	0, 0	2013-03-03	800	Cymlin
Puma	13	0, 0	2013-03-03	800	Cercin
Puma	13	0, 0	2013-03-03	800	Chanob
Puma	13	0, 0	2013-03-03	800	Unk
Puma	13	0, 0	2013-03-03	800	Myrbra
Puma	13	0, 0	2013-03-03	800	Melcru
Puma	13	0, 0	2013-03-03	800	Hylhyp
Puma	13	0, 0	2013-03-03	800	Hypcan
Puma	13	0, 0	2013-03-03	800	Unk
Puma	13	0, 0	2013-03-03	800	Sclcau
Puma	13	0, 0	2013-03-03	800	Ramvit
Puma	13	0, 0	2013-03-03	800	Amafar
Puma	13	-1, 200	2013-03-05	545	Otuwat
Puma	13	-1, 200	2013-03-05	545	Micgil
Puma	13	-1, 200	2013-03-05	545	Dapame
Puma	13	-1, 200	2013-03-05	545	Abucum
Puma	13	-1, 200	2013-03-05	545	Barmar
Puma	13	-1, 200	2013-03-05	545	Xipgut
Puma	13	-1, 200	2013-03-05	545	Micruf
Puma	13	-1, 200	2013-03-05	545	Turalb
Puma	13	-1, 200	2013-03-05	600	Tolpol
Puma	13	-1, 200	2013-03-05	600	Hylsub
Puma	13	-1, 200	2013-03-05	600	Unk
Puma	13	-1, 200	2013-03-05	600	Xipgut
Puma	13	-1, 200	2013-03-05	600	Buccap
Puma	13	-1, 200	2013-03-05	600	Dapame
Puma	13	-1, 200	2013-03-05	600	Hylpoe
Puma	13	-1, 200	2013-03-05	600	Myraxi
Puma	13	-1, 200	2013-03-05	600	Barmar
Puma	13	-1, 200	2013-03-05	600	Cymlin
Puma	13	-1, 200	2013-03-05	600	Capnig
Puma	13	-1, 200	2013-03-05	600	Trovir
Puma	13	-1, 200	2013-03-05	615	Tolpol
Puma	13	-1, 200	2013-03-05	615	Micmar
Puma	13	-1, 200	2013-03-05	615	Tinmaj
Puma	13	-1, 200	2013-03-05	615	Xipgut
Puma	13	-1, 200	2013-03-05	615	Cyavio
Puma	13	-1, 200	2013-03-05	615	Hylpoe
Puma	13	-1, 200	2013-03-05	615	Thaard
Puma	13	-1, 200	2013-03-05	615	Unk
Puma	13	-1, 200	2013-03-05	615	Xipspi
Puma	13	-1, 200	2013-03-05	615	Unk
Puma	13	-1, 200	2013-03-05	615	Capnig
Puma	13	-1, 200	2013-03-05	615	Cymlin
Puma	13	-1, 200	2013-03-05	615	Glyspi
Puma	13	-1, 200	2013-03-05	615	Thacae
Puma	13	-1, 200	2013-03-05	615	Thamur
Puma	13	-1, 200	2013-03-05	615	Hypcan
Puma	13	-1, 200	2013-03-05	630	Myigai
Puma	13	-1, 200	2013-03-05	630	Turalb
Puma	13	-1, 200	2013-03-05	630	Hylpoe
Puma	13	-1, 200	2013-03-05	630	Tinmaj
Puma	13	-1, 200	2013-03-05	630	Capnig
Puma	13	-1, 200	2013-03-05	630	Hyphyp
Puma	13	-1, 200	2013-03-05	630	Unk
Puma	13	-1, 200	2013-03-05	630	Xipgut
Puma	13	-1, 200	2013-03-05	630	Unk
Puma	13	-1, 200	2013-03-05	630	Xipobs
Puma	13	-1, 200	2013-03-05	630	Liotho
Puma	13	-1, 200	2013-03-05	630	Cercin
Puma	13	-1, 200	2013-03-05	630	Unk
Puma	13	-1, 200	2013-03-05	630	Arasev
Puma	13	-1, 200	2013-03-05	630	Colplu
Puma	13	-1, 200	2013-03-05	630	Unk
Puma	13	-1, 200	2013-03-05	630	Brocya
Puma	13	-1, 200	2013-03-05	630	Aramac
Puma	13	-1, 200	2013-03-05	630	Atispa
Puma	13	-1, 200	2013-03-05	645	Ramtuc
Puma	13	-1, 200	2013-03-05	645	Micmar
[truncated: 1,941 more rows]

## Sheet: P2014
Plot	Year	Point	Date	Time	Species
[truncated: 3,183 more rows]

[truncated: 2 more sheets: P2015, P2017]
