# Supplementary material for: Acoustic monitors and direct observations provide similar but distinct perspectives on bird assemblages in a lowland forest of eastern Ecuador
Source: PeerJ. 2021 Jan 13;9:e10565. doi: 10.7717/peerj.10565 (PMC7811295; doi:10.7717/peerj.10565)
Supplement: Supplemental Information 3 — Species observed along transects on two study plots, Harpia and Puma, at Tiputini Biodiversity Station, Ecuador, 2013-2017 (raw data). [file peerj-09-10565-s003.xlsx]

## Sheet: Data
Sheets for Harpia and Puma give lists of species recorded during observations, 2013-2017
Names provides full names for the species codes used in the first two sheets.

## Sheet: Harpia
PLOT	DATE	ALPHACODE
Harpia	2015-02-06	BROCYA
Harpia	2015-02-06	PIPPIP
Harpia	2015-02-06	PIPPIP
Harpia	2015-02-06	PIPPIP
Harpia	2015-02-06	CERCIN
Harpia	2015-02-06	PHARUB
Harpia	2015-02-06	GLYSPI
Harpia	2015-02-06	PIPPIP
Harpia	2015-02-06	AMAFAR
Harpia	2015-02-06	AMAFAR
Harpia	2015-02-06	CAMRUB
Harpia	2015-02-06	LIPVOC
Harpia	2015-02-06	XIPGUT
Harpia	2015-02-06	TINGUT
Harpia	2015-02-06	COLPLU
Harpia	2015-02-06	LIPVOC
Harpia	2015-02-06	PIPPIP
Harpia	2015-02-06	SELREI
Harpia	2015-02-06	SELREI
Harpia	2015-02-06	GEOMON
Harpia	2015-02-06	HYLPOE
Harpia	2015-02-06	COLPLU
Harpia	2015-02-06	CAPNIG
Harpia	2015-02-06	PICCHR
Harpia	2015-02-06	CAPNIG
Harpia	2015-02-06	CAPNIG
Harpia	2015-02-06	CAPNIG
Harpia	2015-02-06	TROVIR
Harpia	2015-02-06	TROVIR
Harpia	2015-02-06	PHAMAL
Harpia	2015-02-06	TANSPP
Harpia	2015-02-06	TANSPP
Harpia	2015-02-06	TANSPP
Harpia	2015-02-12	GEOMON
Harpia	2015-02-12	CAPNIG
Harpia	2015-02-12	PTEPLU
Harpia	2015-02-12	MYRMYO
Harpia	2015-02-12	PHIERT
Harpia	2015-02-12	PHIERT
Harpia	2015-02-12	PHIERT
Harpia	2015-02-14	BUCCAP
Harpia	2015-02-14	BUCCAP
Harpia	2015-02-14	XIPGUT
Harpia	2015-02-14	THASCH
Harpia	2015-02-14	THASCH
Harpia	2015-02-14	BUCCAP
Harpia	2015-02-14	RAMTUC
Harpia	2015-02-14	RAMTUC
Harpia	2015-02-14	MALFUS
Harpia	2015-02-14	CYMLIN
Harpia	2015-02-14	HELAUR
Harpia	2015-02-14	PHIERT
Harpia	2015-02-14	PHIERT
Harpia	2015-02-14	MONMOR
Harpia	2015-02-14	MONMOR
Harpia	2015-02-14	XIPGUT
Harpia	2015-02-14	TANSCH
Harpia	2015-02-14	TANSCH
Harpia	2015-02-14	TANSCH
Harpia	2015-02-14	TANSPP
Harpia	2015-02-14	TANSPP
Harpia	2015-02-14	TANSPP
Harpia	2015-02-14	PYGSTE
Harpia	2015-02-14	XENMIN
Harpia	2015-02-14	XENMIN
Harpia	2015-02-14	SELREI
Harpia	2015-02-14	ANCSTR
Harpia	2015-02-14	PIACAY
Harpia	2015-02-14	LIPVOC
Harpia	2015-02-14	LIPVOC
Harpia	2015-02-14	PIPERY
Harpia	2015-02-14	PIPERY
Harpia	2015-02-14	GLYSPI
Harpia	2015-02-14	MYRBRA
Harpia	2015-02-14	THAFUR
Harpia	2015-02-14	LIPVOC
Harpia	2015-02-14	BROCYA
Harpia	2015-02-14	LIPVOC
Harpia	2015-02-14	LIPVOC
Harpia	2015-02-14	LIPVOC
Harpia	2015-02-14	LIPVOC
Harpia	2015-02-14	THAFUR
Harpia	2015-02-14	PIOMEL
Harpia	2015-02-14	COLPLU
Harpia	2015-02-14	LOPVIT
Harpia	2015-02-14	MYRBRA
Harpia	2015-02-14	MYRLON
Harpia	2015-02-14	MYRBRA
Harpia	2015-02-14	CYMLIN
Harpia	2015-02-14	THACAE
Harpia	2015-02-14	HYPHYP
Harpia	2015-02-14	LIPVOC
Harpia	2015-02-14	GEOMON
Harpia	2015-02-14	LIPVOC
Harpia	2015-02-14	HYLSUB
Harpia	2015-02-14	THACAE
Harpia	2015-02-14	GLYSPI
Harpia	2015-02-14	PIPCOR
Harpia	2015-02-14	ANCSTR
Harpia	2014-02-03	OTUWAT
Harpia	2014-02-03	NYCGRI
Harpia	2014-02-03	NYCAET
Harpia	2014-02-03	TURLAW
Harpia	2014-02-03	CELGRA
Harpia	2014-02-03	XIPGUT
Harpia	2014-02-03	PIOMEL
Harpia	2014-02-03	PIOMEL
Harpia	2014-02-03	PITGRO
Harpia	2014-02-03	ARAMAC
Harpia	2014-02-03	PYGSTE
Harpia	2014-02-03	RAMMEL
Harpia	2014-02-03	MYRMYO
Harpia	2014-02-03	BARMAR
Harpia	2014-02-03	CERCIN
Harpia	2014-02-03	CYMLIN
Harpia	2014-02-03	TINMAJ
Harpia	2014-02-03	BARMAR
Harpia	2014-02-03	UNKHUM
Harpia	2014-02-03	MYRBRA
Harpia	2014-02-03	HEMZOS
Harpia	2014-02-03	TURLAW
Harpia	2014-02-03	BARMAR
Harpia	2014-02-03	MYRERY
Harpia	2014-02-03	MYRERY
Harpia	2014-02-03	HYLPOE
Harpia	2014-02-03	TROMEL
Harpia	2014-02-03	HYPHYP
Harpia	2014-02-03	PIOMEL
Harpia	2014-02-03	PIOMEL
Harpia	2014-02-03	COLPLU
Harpia	2014-02-03	HYPHYP
Harpia	2014-02-03	CYACYA
Harpia	2014-02-03	MYRCAM
Harpia	2014-02-03	GYMLEU
Harpia	2014-02-03	COLPLU
Harpia	2014-02-03	CNISUB
Harpia	2014-02-03	THAFUR
Harpia	2014-02-03	CAPNIG
Harpia	2014-02-03	TROVIR
Harpia	2014-02-03	TROVIR
Harpia	2014-02-03	PHAMAL
Harpia	2014-02-03	MYRMYO
Harpia	2014-02-03	HYLPOE
Harpia	2014-02-03	MYRFJE
Harpia	2014-02-03	TINGUT
Harpia	2014-02-03	CERCIN
Harpia	2014-02-03	TROVIR
Harpia	2014-02-03	CRYSOU
Harpia	2014-02-03	GLYSPI
Harpia	2014-02-03	PIPCOR
Harpia	2014-02-03	PIPCOR
Harpia	2014-02-03	ABUCUM
Harpia	2014-02-03	BROCYA
Harpia	2014-02-03	CERCIN
Harpia	2014-02-03	GEOMON
Harpia	2014-02-03	PIPCOR
Harpia	2014-02-03	CERCIN
Harpia	2014-02-03	HYLPOE
Harpia	2014-02-03	MYRFJE
Harpia	2014-02-03	ABUCUM
Harpia	2014-02-03	HYLPOE
Harpia	2014-02-03	GLYSPI
Harpia	2014-02-03	PSOCRE
Harpia	2014-02-03	PSOCRE
Harpia	2014-02-03	RAMMEL
Harpia	2014-02-03	CERCIN
Harpia	2014-02-03	THRCOR
Harpia	2014-02-03	THRCOR
Harpia	2014-02-03	AMAFAR
Harpia	2014-02-03	CHIPAR
Harpia	2014-02-03	CERCIN
Harpia	2014-02-03	PIPERY
Harpia	2014-02-03	PITGRO
Harpia	2014-02-03	UNKWP
Harpia	2014-02-03	BARMAR
Harpia	2014-02-03	HEMZOS
Harpia	2014-02-03	CYMLIN
Harpia	2014-02-03	CERCIN
Harpia	2014-02-03	PIPCOR
Harpia	2014-02-03	HEMZOS
Harpia	2014-02-03	CHIPAR
Harpia	2014-02-03	CERCIN
Harpia	2014-02-03	THAMUR
Harpia	2014-02-03	MYRAXI
Harpia	2014-02-03	GEOMON
Harpia	2014-02-03	RAMVIT
Harpia	2014-02-03	BARMAR
Harpia	2014-02-03	HYPCAN
Harpia	2014-02-03	TURLAW
Harpia	2014-02-03	GEOMON
Harpia	2014-02-03	MYRMYO
Harpia	2014-02-03	THRCOR
Harpia	2014-02-03	THRCOR
Harpia	2014-02-03	EUPXAN
Harpia	2014-02-03	HYLHYP
Harpia	2014-02-03	CYMLIN
Harpia	2014-02-03	CAPNIG
Harpia	2014-02-03	HYLHYP
Harpia	2014-02-05	TURALB
Harpia	2014-02-05	TYRSTO
Harpia	2014-02-05	JACAUR
Harpia	2014-02-05	GLYSPI
Harpia	2014-02-05	MYRAXI
Harpia	2014-02-05	LIPVOC
Harpia	2014-02-05	HEMZOS
Harpia	2014-02-05	MYRERY
Harpia	2014-02-05	MYRERY
Harpia	2014-02-05	TANNIG
Harpia	2014-02-05	TANNIG
Harpia	2014-02-05	THAMUR
Harpia	2014-02-05	MYRLON
Harpia	2014-02-05	MYRLON
Harpia	2014-02-05	THACAE
Harpia	2014-02-05	MYRMEN
Harpia	2014-02-05	MYRMEN
Harpia	2014-02-05	RAMVIT
Harpia	2014-02-05	THACAE
Harpia	2014-02-05	THAARD
Harpia	2014-02-05	CERCIN
Harpia	2014-02-05	GLYSPI
Harpia	2014-02-05	GLYSPI
Harpia	2014-02-05	TROVIR
Harpia	2014-02-05	TROVIR
Harpia	2014-02-05	MYRCAM
Harpia	2014-02-05	BARMAR
Harpia	2014-02-05	HYLNAE
Harpia	2014-02-05	RHYSIM
Harpia	2014-02-05	DACCAY
Harpia	2014-02-05	PIOMEL
Harpia	2014-02-05	CAMRUB
Harpia	2014-02-05	MYRERY
Harpia	2013-02-17	HYLOCH
Harpia	2013-02-17	MYRHAU
Harpia	2013-02-17	MYRHAU
Harpia	2013-02-17	THASCH
Harpia	2013-02-17	CYMLIN
Harpia	2013-02-17	CAPNIG
Harpia	2013-02-17	LIOTHO
Harpia	2013-02-17	CAPNIG
Harpia	2013-02-17	GLYSPI
Harpia	2013-02-17	HYPCAN
Harpia	2013-02-17	LIOTHO
Harpia	2013-02-17	CERCIN
Harpia	2013-02-17	HYPCAN
Harpia	2013-02-17	MACREG
Harpia	2013-02-17	GLYSPI
Harpia	2013-02-17	TRORUF
Harpia	2013-02-17	HYPCAN
Harpia	2013-02-17	PIPERY
Harpia	2013-02-17	HYLPOE
Harpia	2013-02-17	HYLPOE
Harpia	2013-02-17	HEMZOS
Harpia	2013-02-17	MACREG
Harpia	2013-02-17	CERCIN
Harpia	2013-02-17	PIPERY
Harpia	2013-02-17	PIPERY
Harpia	2014-02-03	ABUCUM
Harpia	2014-02-03	PIPCOR
Harpia	2014-02-03	CAPNIG
Harpia	2014-02-03	CYAVIO
Harpia	2014-02-03	XIPGUT
Harpia	2014-02-03	UNKHUM
Harpia	2014-02-03	TINMAJ
Harpia	2014-02-03	CELGRA
Harpia	2014-02-03	RAMVIT
Harpia	2014-02-03	PSAANG
Harpia	2014-02-03	MELCRU
Harpia	2014-02-05	ABUCUM
Harpia	2014-02-05	MITSAL
Harpia	2014-02-05	NYCOCE
Harpia	2014-02-05	TINGUT
Harpia	2014-02-05	HYLSUB
Harpia	2014-02-05	GYMLEU
Harpia	2014-02-05	DENRUF
Harpia	2014-02-05	THAMUR
Harpia	2014-02-05	HYLPOE
Harpia	2014-02-05	LIOTHO
Harpia	2014-02-05	THACAE
Harpia	2014-02-05	HYPHYP
Harpia	2014-02-05	THACAE
Harpia	2014-02-05	CAPNIG
Harpia	2014-02-05	TINGUT
Harpia	2014-02-05	CERCIN
Harpia	2014-02-05	HYLSUB
Harpia	2014-02-05	PHIERT
Harpia	2014-02-05	TINMAJ
Harpia	2014-02-05	ANCSTR
Harpia	2014-02-05	COLPLU
Harpia	2014-02-05	DACCAY
Harpia	2014-02-05	PIOMEL
Harpia	2014-02-05	PIOMEL
Harpia	2014-02-05	PHAMAL
Harpia	2014-02-05	COLPLU
Harpia	2014-02-05	GLYSPI
Harpia	2014-02-05	AMAFAR
Harpia	2014-02-05	AMAFAR
Harpia	2014-02-05	MALFUS
Harpia	2014-02-05	COLPLU
Harpia	2014-02-05	GEOMON
Harpia	2014-02-05	COLSUB
Harpia	2014-02-05	LIOTHO
Harpia	2014-02-05	MALFUS
Harpia	2014-02-05	PIPPIP
Harpia	2014-02-05	THAMUR
Harpia	2014-02-05	THAMUR
Harpia	2014-02-05	TINGUT
Harpia	2014-02-05	TURALB
Harpia	2014-02-05	MALFUS
Harpia	2014-02-05	MYRHAU
Harpia	2014-02-05	CACCEL
Harpia	2014-02-05	COLPLU
Harpia	2014-02-05	CAPNIG
Harpia	2014-02-05	COLPLU
Harpia	2014-02-05	PIPCOR
Harpia	2014-02-05	THAMUR
Harpia	2014-02-05	RAMVIT
Harpia	2014-02-05	COLPLU
Harpia	2014-02-05	CHIPAR
Harpia	2014-02-05	HYLNAE
Harpia	2014-02-05	XIPGUT
Harpia	2014-02-05	EUPRUF
Harpia	2014-02-05	XIPGUT
Harpia	2014-02-05	HYLNAE
Harpia	2014-02-05	MYRBRA
Harpia	2014-02-05	PIPCOR
Harpia	2014-02-05	DACCAY
Harpia	2014-02-05	DACCAY
Harpia	2014-02-05	CERCIN
Harpia	2014-02-05	TYRSTO
Harpia	2014-02-05	MICMAR
Harpia	2014-02-05	PHAMAL
Harpia	2014-02-05	TROVIR
Harpia	2014-02-05	PIOMEL
Harpia	2014-02-05	PIOMEL
Harpia	2014-02-05	HENLEU
Harpia	2014-02-05	THRCOR
Harpia	2014-02-05	THRCOR
Harpia	2014-02-03	PHIERT
Harpia	2014-02-09	TINMAJ
Harpia	2014-02-09	DENRUF
Harpia	2014-02-09	NOTURU
Harpia	2014-02-09	PENJAC
Harpia	2014-02-09	MICGIL
Harpia	2014-02-09	ABUCUM
Harpia	2014-02-09	BUCCAP
Harpia	2014-02-09	MICGIL
Harpia	2014-02-09	DENRUF
Harpia	2014-02-09	DENRUF
Harpia	2014-02-09	XIPGUT
Harpia	2014-02-09	CYMLIN
Harpia	2014-02-09	TINGUT
Harpia	2014-02-09	GLYSPI
Harpia	2014-02-09	TINGUT
Harpia	2014-02-09	MYRMEN
Harpia	2014-02-09	LIPVOC
Harpia	2014-02-09	GLYSPI
Harpia	2014-02-09	THAMUR
Harpia	2014-02-09	GLYSPI
Harpia	2014-02-09	HEMZOS
Harpia	2014-02-09	HYLNAE
Harpia	2014-02-09	PIPERY
Harpia	2014-02-09	THACAE
Harpia	2014-02-09	THACAE
Harpia	2014-02-09	MYRFJE
Harpia	2014-02-09	FLOMEL
Harpia	2014-02-09	TANCHI
Harpia	2014-02-09	TANCHI
Harpia	2014-02-09	TANCHI
Harpia	2014-02-09	TANCHI
Harpia	2014-02-09	TANCHI
Harpia	2014-02-09	TANNIG
Harpia	2014-02-09	TANNIG
Harpia	2014-02-09	TANNIG
Harpia	2014-02-09	TANVEL
Harpia	2014-02-09	TANVEL
Harpia	2014-02-09	DACFLA
Harpia	2014-02-09	DACFLA
Harpia	2014-02-09	ANCSTR
Harpia	2014-02-09	ARAARA
Harpia	2014-02-09	ARAARA
Harpia	2014-02-09	PSAANG
Harpia	2014-02-09	CERCIN
Harpia	2014-02-09	PSAANG
Harpia	2014-02-09	PSAANG
Harpia	2014-02-09	HEMZOS
Harpia	2014-02-09	TANNIG
Harpia	2014-02-09	TANNIG
Harpia	2014-02-09	PSAANG
Harpia	2014-02-09	GLYSPI
Harpia	2014-02-09	MYRFJE
Harpia	2014-02-09	LIPVOC
Harpia	2014-02-09	CERCIN
Harpia	2014-02-09	RAMTUC
Harpia	2014-02-09	TYRSTO
Harpia	2014-02-09	DICCIN
Harpia	2014-02-09	CERCIN
Harpia	2014-02-09	LIPVOC
Harpia	2014-02-09	LIPVOC
Harpia	2014-02-09	LIPVOC
Harpia	2014-02-09	TURLAW
Harpia	2014-02-09	GLYSPI
Harpia	2014-02-09	GLYSPI
Harpia	2014-02-09	LIPVOC
Harpia	2014-02-09	MYRFJE
Harpia	2014-02-09	LIPVOC
Harpia	2014-02-09	MYRBRA
Harpia	2014-02-09	LIPVOC
Harpia	2014-02-09	RHEMEL
Harpia	2014-02-09	RAMTUC
Harpia	2014-02-09	TANNIG
Harpia	2014-02-09	TANNIG
Harpia	2014-02-09	TANCHI
Harpia	2014-02-09	TANCHI
Harpia	2014-02-09	COLPLU
Harpia	2014-02-09	HYLPOE
Harpia	2014-02-09	AMAFAR
Harpia	2014-02-09	LIPVOC
Harpia	2014-02-09	XIPGUT
Harpia	2014-02-09	THAMUR
Harpia	2014-02-09	GLYSPI
Harpia	2014-02-09	THACAE
Harpia	2014-02-09	MYRLON
Harpia	2014-02-09	HYLOCH
Harpia	2014-02-09	CYMLIN
Harpia	2014-02-09	MYRAXI
Harpia	2014-02-09	LIPVOC
Harpia	2014-02-09	HYPCAN
Harpia	2014-02-09	AMAFAR
Harpia	2014-02-09	TURLAW
Harpia	2014-02-09	THAMUR
Harpia	2014-02-09	CAPNIG
Harpia	2014-02-09	TYRSTO
Harpia	2014-02-09	HEMZOS
Harpia	2014-02-09	MYRLON
Harpia	2014-02-09	MYRAXI
Harpia	2014-02-09	THACAE
Harpia	2014-02-09	AMAFAR
Harpia	2014-02-09	SELREI
Harpia	2014-02-09	PIPERY
Harpia	2014-02-09	MYRMEN
Harpia	2014-02-09	DACCAY
Harpia	2014-02-09	DACCAY
Harpia	2014-02-09	CERCIN
Harpia	2014-02-09	CAPNIG
Harpia	2014-02-09	GEOMON
Harpia	2014-02-09	GALALB
Harpia	2014-02-09	GALALB
Harpia	2014-02-09	GLYSPI
Harpia	2014-02-09	HYLNAE
Harpia	2014-02-09	LIOTHO
Harpia	2014-02-09	MIOOLE
Harpia	2014-02-09	RAMMEL
Harpia	2014-02-09	PIOMEL
Harpia	2014-02-09	PIOMEL
Harpia	2014-02-09	MYRBRA
Harpia	2014-02-09	LIOTHO
Harpia	2014-02-09	GEOMON
Harpia	2014-02-09	CERCIN
Harpia	2014-02-09	GLYSPI
Harpia	2014-02-09	GLYSPI
Harpia	2014-02-09	FORCOL
Harpia	2014-02-09	AMAFAR
Harpia	2014-02-09	AMAFAR
Harpia	2014-02-09	NASLON
Harpia	2014-02-09	CAMMEL
Harpia	2014-02-09	PIPPIP
Harpia	2014-02-09	PIPPIP
Harpia	2014-02-09	NASLON
Harpia	2014-02-09	PYGSTE
Harpia	2014-02-09	TYRSTO
Harpia	2014-02-09	PHAMAL
Harpia	2014-02-09	HYPHYP
Harpia	2014-02-13	PULPER
Harpia	2014-02-13	OTUWAT
Harpia	2014-02-13	LOPCRI
Harpia	2014-02-13	CICHUH
Harpia	2014-02-13	NYCAET
Harpia	2014-02-13	CRYSOU
Harpia	2014-02-13	NYCOCE
Harpia	2014-02-13	HYLSUB
Harpia	2014-02-13	TINMAJ
Harpia	2014-02-13	XIPGUT
Harpia	2014-02-13	XIPGUT
Harpia	2014-02-13	DENRUF
Harpia	2014-02-13	PIPCHL
Harpia	2014-02-13	BUCCAP
Harpia	2014-02-13	CERCIN
Harpia	2014-02-13	AUTINF
Harpia	2014-02-13	THAMUR
Harpia	2014-02-13	THAMUR
Harpia	2014-02-13	LIOTHO
Harpia	2014-02-13	DENCER
Harpia	2014-02-13	DENCER
Harpia	2014-02-13	XIPGUT
Harpia	2014-02-13	LIOTHO
Harpia	2014-02-13	HYPHYP
Harpia	2014-02-13	THAMUR
Harpia	2014-02-13	AUTINF
Harpia	2014-02-13	TINGUT
Harpia	2014-02-13	MYRBRA
Harpia	2014-02-13	TINGUT
Harpia	2014-02-13	GEOMON
Harpia	2014-02-13	MYRCAM
Harpia	2014-02-13	AUTINF
Harpia	2014-02-13	FREUND
Harpia	2014-02-13	MYRMYO
Harpia	2014-02-13	MYRMYO
Harpia	2014-02-13	THAMUR
Harpia	2014-02-13	HYLSUB
Harpia	2014-02-13	PHAMAL
Harpia	2014-02-13	HENLEU
Harpia	2014-02-13	HENLEU
Harpia	2014-02-13	THAMUR
Harpia	2014-02-13	CERCIN
Harpia	2014-02-13	TOLASS
Harpia	2014-02-13	LOPVIT
Harpia	2014-02-13	CAPNIG
Harpia	2014-02-13	COLPLU
Harpia	2014-02-13	COLPLU
Harpia	2014-02-13	THASCH
Harpia	2014-02-13	HYLPOE
Harpia	2014-02-13	HYLSUB
Harpia	2014-02-13	PHAFUL
Harpia	2014-02-13	THASCH
Harpia	2014-02-13	HYLPOE
Harpia	2014-02-13	CAPNIG
Harpia	2014-02-13	THRCOR
Harpia	2014-02-13	COLPLU
Harpia	2014-02-13	THRCOR
Harpia	2014-02-13	UNKHUM
Harpia	2014-02-13	EUPXAN
Harpia	2014-02-13	CELGRA
Harpia	2014-02-13	COLPLU
Harpia	2014-02-13	MYRFOR
Harpia	2014-02-13	PHAMAL
Harpia	2014-02-13	MYRFOR
Harpia	2014-02-13	COLPLU
Harpia	2014-02-13	MONMOR
Harpia	2014-02-13	MONMOR
Harpia	2014-02-13	CELGRA
Harpia	2014-02-13	CYMLIN
Harpia	2014-02-13	PITGRO
Harpia	2014-02-13	SCLRUF
Harpia	2014-02-13	UNKHUM
Harpia	2014-02-13	AUTINF
Harpia	2014-02-13	AUTINF
Harpia	2014-02-13	MYRLON
Harpia	2014-02-13	MYICAN
Harpia	2014-02-13	MYICAN
Harpia	2014-02-13	XIPGUT
Harpia	2014-02-13	THASCH
Harpia	2014-02-13	MYRBRA
Harpia	2014-02-13	LIOTHO
Harpia	2014-02-13	CAPNIG
Harpia	2014-02-13	HYLSUB
Harpia	2014-02-13	TINMAJ
Harpia	2014-02-13	AUTINF
Harpia	2014-02-13	SCLCAU
Harpia	2014-02-13	MYRLON
Harpia	2014-02-13	LIOTHO
Harpia	2014-02-13	THAMUR
Harpia	2014-02-13	THAMUR
Harpia	2014-02-13	GEOMON
Harpia	2014-02-13	PSAYUR
Harpia	2014-02-13	PSAYUR
Harpia	2014-02-13	XIPGUT
Harpia	2014-02-13	CAPNIG
Harpia	2014-02-13	CAPNIG
Harpia	2014-02-13	PIACAY
Harpia	2014-02-13	MYRCAM
Harpia	2014-02-13	MYRBRA
Harpia	2014-02-13	SCLCAU
Harpia	2014-02-13	CERCIN
Harpia	2014-02-13	CELGRA
Harpia	2014-02-13	PIOMEL
Harpia	2014-02-13	MYRCAM
Harpia	2014-02-13	PIPCOR
Harpia	2014-02-13	PSADEC
Harpia	2014-02-13	COLSUB
Harpia	2014-02-13	TROMEL
Harpia	2014-02-13	TURALB
Harpia	2014-02-13	COLPLU
Harpia	2014-02-13	PLACOR
Harpia	2014-02-13	CHIPAR
Harpia	2014-02-13	CHIPAR
Harpia	2014-02-13	CAPNIG
Harpia	2014-02-13	TROMEL
Harpia	2014-02-13	TURLAW
Harpia	2014-02-13	CAPNIG
Harpia	2014-02-13	PYGSTE
Harpia	2014-02-13	PIPCOR
Harpia	2014-02-13	CAPNIG
Harpia	2014-02-13	THAMUR
Harpia	2014-02-13	PHONIG
Harpia	2014-02-13	HYLOCH
Harpia	2014-02-13	THACAE
Harpia	2014-02-13	MYRLON
Harpia	2014-02-13	THACAE
Harpia	2014-02-13	THAARD
Harpia	2014-02-13	MYRERY
Harpia	2014-02-13	THAARD
Harpia	2014-02-13	MYRLON
Harpia	2014-02-13	HABRUB
Harpia	2014-02-13	BROCYA
Harpia	2014-02-13	BROCYA
Harpia	2014-02-13	TURLAW
Harpia	2014-02-13	PHAMAL
Harpia	2014-02-13	AMAFAR
Harpia	2014-02-13	CAMMEL
Harpia	2014-02-13	GEOMON
Harpia	2014-02-13	THASCH
Harpia	2014-02-13	HYPCAN
Harpia	2014-02-13	HYLSUB
Harpia	2014-02-13	GALALB
Harpia	2014-02-13	GALALB
Harpia	2014-02-13	EUPXAN
Harpia	2014-02-13	HENLEU
Harpia	2014-02-13	CERCIN
Harpia	2014-02-13	MYRAXI
Harpia	2014-02-13	THACAE
Harpia	2014-02-13	MYRERY
Harpia	2014-02-13	MYRBRA
Harpia	2014-02-13	THAMUR
Harpia	2014-02-13	THACAE
Harpia	2014-02-13	GEOMON
Harpia	2014-02-13	ANCSTR
Harpia	2014-02-13	TRORUF
Harpia	2014-02-13	BARMAR
Harpia	2014-02-13	PITGRO
Harpia	2014-02-13	CHIPAR
Harpia	2014-02-13	XIPGUT
Harpia	2014-02-13	BROCYA
Harpia	2014-02-13	TRORUF
Harpia	2014-02-13	PHIRUF
Harpia	2014-02-13	PHIERT
Harpia	2014-02-13	THAMUR
Harpia	2014-02-13	XIPGUT
Harpia	2014-02-13	TURLAW
Harpia	2014-02-13	COLSUB
Harpia	2014-02-13	CERCIN
Harpia	2014-02-13	CAPNIG
Harpia	2014-02-13	HYLNAE
Harpia	2014-02-13	MYRBRA
Harpia	2014-02-13	BARMAR
Harpia	2014-02-13	BARMAR
Harpia	2014-02-13	PIACAY
Harpia	2014-02-15	NYCGRA
Harpia	2014-02-15	BARMAR
Harpia	2014-02-15	TURALB
Harpia	2014-02-15	NYCAET
Harpia	2014-02-15	XIPGUT
Harpia	2014-02-15	ATISPA
Harpia	2014-02-15	HYLPOE
Harpia	2014-02-15	HYLOCH
Harpia	2014-02-15	MYRAXI
Harpia	2014-02-15	PENJAC
Harpia	2014-02-15	XIPGUT
Harpia	2014-02-15	THACAE
Harpia	2014-02-15	THACAE
Harpia	2014-02-15	THAARD
Harpia	2014-02-15	MYRAXI
Harpia	2014-02-15	MYRMEN
Harpia	2014-02-15	AUTINF
Harpia	2014-02-15	PHAMAL
Harpia	2014-02-15	MYRLON
Harpia	2014-02-15	MYRLON
Harpia	2014-02-15	XIPGUT
Harpia	2014-02-15	MYRHAU
Harpia	2014-02-15	THRCOR
Harpia	2014-02-15	THRCOR
Harpia	2014-02-15	THAARD
Harpia	2014-02-15	THACAE
Harpia	2014-02-15	PTEAZA
Harpia	2014-02-15	PTEAZA
Harpia	2014-02-15	PTEAZA
Harpia	2014-02-15	MICGIL
Harpia	2014-02-15	MICGIL
Harpia	2014-02-15	ATISPA
Harpia	2014-02-15	XIPGUT
Harpia	2014-02-15	CHIPAR
Harpia	2014-02-15	MYRMYO
Harpia	2014-02-15	COLPLU
Harpia	2014-02-15	HYLNAE
Harpia	2014-02-15	MYRMYO
Harpia	2014-02-15	HYLNAE
Harpia	2014-02-15	COLPLU
Harpia	2014-02-15	GLYSPI
Harpia	2014-02-15	PIPCHL
Harpia	2014-02-15	GLYSPI
Harpia	2014-02-15	THAMUR
Harpia	2014-02-15	CHIPAR
Harpia	2014-02-15	HYLOCH
Harpia	2014-02-15	TOLASS
Harpia	2014-02-15	PIOMEN
Harpia	2014-02-15	MYRFOR
Harpia	2014-02-15	THAMUR
Harpia	2014-02-15	THAMUR
Harpia	2014-02-15	HYLSUB
Harpia	2014-02-15	GLYSPI
Harpia	2014-02-15	HEMZOS
Harpia	2014-02-15	GLYSPI
Harpia	2014-02-15	THAMUR
Harpia	2014-02-15	SELREI
Harpia	2014-02-15	SELREI
Harpia	2014-02-15	MYRLON
Harpia	2014-02-15	MYRLON
Harpia	2014-02-15	ATISPA
Harpia	2014-02-15	MYRBRA
Harpia	2014-02-15	TURALB
Harpia	2014-02-15	MYRAXI
Harpia	2014-02-15	THACAE
Harpia	2014-02-15	MYRERY
Harpia	2014-02-15	XIPOCE
Harpia	2014-02-15	MYRERY
Harpia	2014-02-15	GLYSPI
Harpia	2014-02-15	SELREI
Harpia	2014-02-15	RAMTUC
Harpia	2014-02-15	HYLSUB
Harpia	2014-02-15	PIPCOR
Harpia	2014-02-15	PIPCOR
Harpia	2014-02-15	CHIPAR
Harpia	2014-02-15	CHIPAR
Harpia	2014-02-15	CELGRA
Harpia	2014-02-15	MYRCAM
Harpia	2014-02-15	RAMTUC
Harpia	2014-02-15	TRORUF
Harpia	2014-02-15	THAMUR
Harpia	2014-02-15	XIPGUT
Harpia	2014-02-15	TROMEL
Harpia	2014-02-15	AUTINF
Harpia	2014-02-15	TOLASS
Harpia	2014-02-15	CYMLIN
Harpia	2014-02-15	HYLNAE
Harpia	2014-02-15	GLYSPI
Harpia	2014-02-15	AUTINF
Harpia	2014-02-15	CERCIN
Harpia	2014-02-15	XENMIN
Harpia	2014-02-15	PHAMAL
Harpia	2014-02-15	MIOOLE
Harpia	2014-02-15	THAMUR
Harpia	2014-02-15	NASLON
Harpia	2014-02-15	LIOTHO
Harpia	2014-02-15	CHIPAR
Harpia	2014-02-15	CHIPAR
Harpia	2014-02-15	HYLNAE
Harpia	2014-02-15	THACAE
Harpia	2014-02-15	PITGRO
Harpia	2014-02-15	COLPLU
Harpia	2014-02-15	THACAE
Harpia	2014-02-15	MYRFOR
Harpia	2014-02-15	COLPLU
Harpia	2014-02-15	PITGRO
Harpia	2014-02-15	GEOMON
Harpia	2014-02-15	CRYCIN
Harpia	2014-02-15	TINMAJ
Harpia	2014-02-15	GLYSPI
Harpia	2014-02-15	GEOMON
Harpia	2014-02-15	COLPLU
Harpia	2014-02-15	PIPCHL
Harpia	2014-02-15	MYRMEN
Harpia	2014-02-15	MYRBRA
Harpia	2014-02-15	MYRLON
Harpia	2014-02-15	MYRMEN
Harpia	2014-02-15	MYRLON
Harpia	2014-02-15	THACAE
Harpia	2014-02-15	PIPCHL
Harpia	2014-02-15	AUTOCH
Harpia	2014-02-15	PIPCHL
Harpia	2014-02-15	CERCIN
Harpia	2014-02-15	CERCIN
Harpia	2014-02-15	CELGRA
Harpia	2014-02-15	SELREI
Harpia	2014-02-15	OTUWAT
Harpia	2014-02-15	HEMZOS
Harpia	2014-02-15	THRCOR
Harpia	2014-02-15	THRCOR
Harpia	2014-02-15	XIPGUT
Harpia	2014-02-15	CHIPAR
Harpia	2014-02-15	CHIPAR
Harpia	2014-02-15	SCLCAU
Harpia	2014-02-15	TINMAJ
Harpia	2014-02-15	AUTINF
Harpia	2014-02-15	CAPNIG
Harpia	2014-02-15	CHIPAR
Harpia	2014-02-15	TITCAY
Harpia	2014-02-15	TOLASS
Harpia	2014-02-15	CYMLIN
Harpia	2014-02-19	OTUWAT
Harpia	2014-02-19	XIPGUT
Harpia	2014-02-19	MYRCAM
Harpia	2014-02-19	GEOMON
Harpia	2014-02-19	PYGSTE
Harpia	2014-02-19	GLYSPI
Harpia	2014-02-19	THAMUR
Harpia	2014-02-19	PTEAZA
Harpia	2014-02-19	AUTMEL
Harpia	2014-02-19	GLYSPI
Harpia	2014-02-19	XIPGUT
Harpia	2014-02-21	AUTINF
Harpia	2014-02-21	HYLHYP
Harpia	2014-02-21	HYLHYP
Harpia	2014-02-21	TROMEL
Harpia	2014-02-21	ATISPA
Harpia	2014-02-21	MYRMYO
Harpia	2014-02-21	CHIPAR
Harpia	2014-02-21	TYRELA
Harpia	2014-02-21	PHAMAL
Harpia	2014-02-21	TURALB
Harpia	2014-02-21	HYLNAE
Harpia	2014-02-21	LIOTHO
Harpia	2014-02-21	CAMTUR
Harpia	2014-02-21	CAMTUR
Harpia	2014-02-21	TOLASS
Harpia	2014-02-21	LANFUL
Harpia	2014-02-21	GLYSPI
Harpia	2014-02-21	THACAE
Harpia	2014-02-21	THACAE
Harpia	2014-02-21	HYLHYP
Harpia	2014-02-21	HYLHYP
Harpia	2014-02-21	AUTINF
Harpia	2014-02-21	TURALB
Harpia	2014-02-21	HYLSUB
Harpia	2014-02-21	PIOMEL
Harpia	2014-02-21	UNKHUM
Harpia	2014-02-21	PIOMEL
Harpia	2014-02-21	PIOMEL
Harpia	2014-02-21	PIOMEL
Harpia	2014-02-21	TYRSTO
Harpia	2014-02-21	XIPGUT
Harpia	2014-02-21	MYRBRA
Harpia	2014-02-21	GLYSPI
Harpia	2014-02-21	PIPERY
Harpia	2014-02-21	THACAE
Harpia	2014-02-21	XIPGUT
Harpia	2014-02-21	BARMAR
Harpia	2014-02-21	LIPVOC
Harpia	2014-02-21	CERCIN
Harpia	2014-02-21	HEMZOS
Harpia	2014-02-21	PIPPIP
Harpia	2014-02-21	PIPPIP
Harpia	2014-02-21	MELCRU
Harpia	2014-02-21	MELCRU
Harpia	2014-02-21	MYRCAM
Harpia	2014-02-21	COLPLU
Harpia	2014-02-21	HYPHYP
Harpia	2014-02-21	RAMTUC
Harpia	2014-02-21	PHAMAL
Harpia	2014-02-21	CHIPAR
Harpia	2014-02-21	COLPLU
Harpia	2014-02-21	PITGRO
Harpia	2014-02-21	PITGRO
Harpia	2014-02-21	CRYCIN
Harpia	2014-02-21	TURALB
Harpia	2014-02-21	HERDUG
Harpia	2014-02-21	MYRBRA
Harpia	2014-02-21	COLPLU
Harpia	2014-02-21	CHIPAR
Harpia	2014-02-21	PSAVIR
Harpia	2014-02-21	CHIPAR
Harpia	2014-02-21	CHIPAR
Harpia	2014-02-21	THRCOR
Harpia	2014-02-21	THRCOR
Harpia	2014-02-21	COLPLU
Harpia	2014-02-21	MYIGRA
Harpia	2014-02-19	PIPCOR
Harpia	2014-02-19	HYPHYP
Harpia	2014-02-19	CRYCIN
Harpia	2014-02-19	TINGUT
Harpia	2014-02-19	COLPLU
Harpia	2014-02-19	CAPNIG
Harpia	2014-02-19	THASCH
Harpia	2014-02-19	CERCIN
Harpia	2014-02-19	PIOMEL
Harpia	2014-02-19	RHYSIM
Harpia	2014-02-19	CAPNIG
Harpia	2014-02-19	MYRCAM
Harpia	2014-02-19	THASCH
Harpia	2014-02-19	HYLOCH
Harpia	2014-02-19	THACAE
Harpia	2014-02-19	GLYSPI
Harpia	2014-02-19	THAARD
Harpia	2014-02-19	MYRAXI
Harpia	2014-02-19	THAARD
Harpia	2014-02-19	MYRMEN
Harpia	2014-02-19	MYRERY
Harpia	2014-02-19	MYRERY
Harpia	2014-02-19	MYRLON
Harpia	2014-02-19	GLYSPI
Harpia	2014-02-19	PIPPIP
Harpia	2014-02-19	CERCIN
Harpia	2014-02-19	GEOMON
Harpia	2014-02-19	HYLNAE
Harpia	2014-02-19	THACAE
Harpia	2014-02-19	HYLOCH
Harpia	2014-02-19	PIPPIP
Harpia	2014-02-19	PIOMEL
Harpia	2014-02-19	PIOMEL
Harpia	2015-02-06	BUCCAP
Harpia	2014-02-19	MYRAXI
Harpia	2014-02-19	HYLOCH
Harpia	2014-02-19	HYLPOE
Harpia	2014-02-19	THACAE
Harpia	2014-02-19	GLYSPI
Harpia	2014-02-19	CERCIN
Harpia	2014-02-19	MYRMYO
Harpia	2014-02-19	PIOMEL
Harpia	2014-02-19	HYLHYP
Harpia	2014-02-19	PENJAC
Harpia	2014-02-19	CAPNIG
Harpia	2014-02-19	EUBRIC
Harpia	2014-02-19	THACAE
Harpia	2014-02-19	HYLHYP
Harpia	2014-02-19	BROCYA
Harpia	2014-02-19	AMAOCH
Harpia	2014-02-19	AMAFAR
Harpia	2014-02-19	CERCIN
Harpia	2014-02-19	GEOMON
Harpia	2014-02-19	CAPNIG
Harpia	2014-02-19	HYPHYP
Harpia	2014-02-19	CERCIN
Harpia	2014-02-19	PIOMEL
Harpia	2014-02-19	PIOMEL
Harpia	2014-02-19	XIPGUT
Harpia	2014-02-19	THAFUR
Harpia	2014-02-19	PIPCOR
Harpia	2014-02-19	CERCIN
Harpia	2014-02-19	XIPGUT
Harpia	2014-02-19	MYRBRA
Harpia	2014-02-19	MYRBRA
Harpia	2014-02-19	RAMMEL
Harpia	2014-02-19	MYRMYO
Harpia	2014-02-19	MYRCAM
Harpia	2014-02-19	CHANOB
Harpia	2014-02-19	PIPCOR
Harpia	2014-02-19	CERCIN
Harpia	2014-02-19	MYRMYO
Harpia	2014-02-19	PIPCOR
Harpia	2014-02-19	CAMMEL
Harpia	2014-02-19	ANCSTR
Harpia	2014-02-19	MYRBRA
Harpia	2014-02-19	RAMTUC
Harpia	2014-02-19	MYRFJE
Harpia	2014-02-19	HYLNAE
Harpia	2014-02-19	TROMEL
Harpia	2014-02-19	MIOOLE
Harpia	2014-02-19	CAPNIG
Harpia	2014-02-20	PENJAC
Harpia	2014-02-20	GLYSPI
Harpia	2014-02-20	THAMUR
Harpia	2014-02-20	THAMUR
Harpia	2014-02-20	THACAE
Harpia	2014-02-20	TINGUT
Harpia	2014-02-20	BARMAR
Harpia	2014-02-20	BARMAR
Harpia	2014-02-20	THAMUR
Harpia	2014-02-20	MYRFOR
Harpia	2014-02-20	MICMAR
Harpia	2014-02-20	TOLASS
Harpia	2014-02-20	PIPERY
Harpia	2014-02-20	PIPERY
Harpia	2014-02-20	PIPERY
Harpia	2014-02-20	HYLNAE
Harpia	2014-02-20	MYRCAM
Harpia	2014-02-20	XIPGUT
Harpia	2014-02-20	PHABOU
Harpia	2014-02-20	PHABOU
Harpia	2014-02-20	PHABOU
Harpia	2014-02-20	PHABOU
Harpia	2014-02-20	TROVIR
Harpia	2014-02-20	MYRCAM
Harpia	2014-02-20	COLPLU
Harpia	2014-02-20	LIOTHO
Harpia	2014-02-20	RAMMEL
Harpia	2014-02-20	GLYSPI
Harpia	2014-02-20	TYRSTO
Harpia	2014-02-20	MICMAR
Harpia	2014-02-20	GLYSPI
Harpia	2014-02-20	PYGSTE
Harpia	2014-02-20	HYLHYP
Harpia	2014-02-20	THASCH
Harpia	2014-02-20	TINGUT
Harpia	2014-02-20	LIPVOC
Harpia	2014-02-20	THACAE
Harpia	2014-02-20	PYGSTE
Harpia	2014-02-20	GLYSPI
Harpia	2014-02-20	MYRCAM
Harpia	2014-02-20	THRNIG
Harpia	2014-02-20	THRNIG
Harpia	2014-02-20	THAFUR
Harpia	2014-02-20	RAMTUC
Harpia	2014-02-20	CYAVIO
Harpia	2014-02-20	PITGRO
Harpia	2014-02-20	CERCIN
Harpia	2014-02-20	TROVIR
Harpia	2014-02-20	HEMZOS
Harpia	2014-02-20	CYMLIN
Harpia	2014-02-20	RAMTUC
Harpia	2014-02-20	RAMTUC
Harpia	2014-02-20	MONMOR
Harpia	2014-02-20	MONMOR
Harpia	2014-02-20	MONMOR
Harpia	2014-02-20	PIPPIP
Harpia	2014-02-20	BROCYA
Harpia	2014-02-20	PTEPLU
Harpia	2014-02-20	PTEPLU
Harpia	2014-02-20	TROVIR
Harpia	2014-02-20	LIPVOC
Harpia	2014-02-20	CRYCIN
Harpia	2014-02-20	CYMLIN
Harpia	2014-02-20	HYLHYP
Harpia	2014-02-20	HYLHYP
Harpia	2014-02-20	MYRBRA
Harpia	2014-02-20	COLPLU
Harpia	2014-02-20	TOLASS
Harpia	2014-02-20	TANNIG
Harpia	2014-02-20	TANNIG
Harpia	2014-02-20	HYLNAE
Harpia	2014-02-20	GLYSPI
Harpia	2014-02-20	MIOOLE
Harpia	2014-02-20	BARMAR
Harpia	2014-02-20	MICCIN
Harpia	2014-02-20	MYRLON
Harpia	2014-02-20	MYRBRA
Harpia	2014-02-20	HYLOCH
Harpia	2014-02-20	HYLHYP
Harpia	2014-02-20	THACAE
Harpia	2014-02-20	MYRLON
Harpia	2014-02-20	HYLOCH
Harpia	2014-02-20	GLYSPI
Harpia	2014-02-20	XIPGUT
Harpia	2014-02-20	MYRERY
Harpia	2014-02-20	PYGSTE
Harpia	2014-02-20	HABRUB
Harpia	2014-02-20	HABRUB
Harpia	2014-02-20	THACAE
Harpia	2014-02-20	GLYSPI
Harpia	2014-02-20	RAMMEL
Harpia	2014-02-20	XIPGUT
Harpia	2014-02-20	AUTINF
Harpia	2014-02-20	PHIERY
Harpia	2014-02-20	MYRHAU
Harpia	2014-02-20	MYRHAU
Harpia	2014-02-20	TURALB
Harpia	2014-02-20	MYRBRA
Harpia	2014-02-20	PHAMAL
Harpia	2014-02-20	TURALB
Harpia	2014-02-20	HYLNAE
Harpia	2014-02-20	MYRBRA
Harpia	2014-02-20	HYLHYP
Harpia	2014-02-20	CACCEL
Harpia	2014-02-20	MYRBRA
Harpia	2014-02-20	TANSPP
Harpia	2014-02-20	TANSPP
Harpia	2014-02-20	CHIPAR
Harpia	2014-02-20	PHABOU
Harpia	2014-02-20	CERCIN
Harpia	2014-02-20	HYLNAE
Harpia	2014-02-20	CELGRA
Harpia	2014-02-21	CICHUH
Harpia	2014-02-21	MICGIL
Harpia	2014-02-21	HYLSUB
Harpia	2014-02-21	XIPGUT
Harpia	2014-02-21	XIPGUT
Harpia	2014-02-21	XIPGUT
Harpia	2014-02-21	MYRCAM
Harpia	2014-02-21	ORNINE
Harpia	2014-02-21	CAPNIG
Harpia	2014-02-21	TYRSTO
Harpia	2014-02-21	FREUND
Harpia	2014-02-21	THAFUR
Harpia	2014-02-21	ATISPA
Harpia	2014-02-21	RAMTUC
Harpia	2014-02-21	GLYSPI
Harpia	2014-02-21	COLPLU
Harpia	2014-02-21	HYPCAN
Harpia	2014-02-21	COLPLU
Harpia	2014-02-21	HYPCAN
Harpia	2014-02-21	HYLNAE
Harpia	2014-02-21	MYRBRA
Harpia	2014-02-21	MYRBRA
Harpia	2014-02-21	MYRMYO
Harpia	2014-02-21	PIPCOR
Harpia	2014-02-21	PIPCOR
Harpia	2014-02-21	XIPGUT
Harpia	2014-02-21	HYLNAE
Harpia	2014-02-21	HYLNAE
Harpia	2014-02-21	ATISPA
Harpia	2014-02-21	GLYSPI
Harpia	2014-02-21	GEOMON
Harpia	2014-02-21	COLPLU
Harpia	2014-02-21	MYITUB
Harpia	2014-02-21	THAMUR
Harpia	2014-02-21	TINGUT
Harpia	2014-02-21	CERCIN
Harpia	2014-02-21	CERCIN
Harpia	2014-02-21	PIPERY
Harpia	2014-02-21	PIPERY
Harpia	2015-02-06	HYLPOE
Harpia	2015-02-06	BUCCAP
Harpia	2015-02-06	THAMUR
Harpia	2015-02-06	TOLASS
Harpia	2015-02-06	HEMZOS
Harpia	2015-02-06	TINGUT
Harpia	2015-02-06	TACSUR
Harpia	2015-02-06	TACSUR
Harpia	2015-02-06	TACSUR
Harpia	2015-02-06	GLYSPI
Harpia	2015-02-06	LIPVOC
Harpia	2015-02-06	HYLHYP
Harpia	2015-02-06	HYLHYP
Harpia	2015-02-06	HYLHYP
Harpia	2015-02-06	EUPRUF
Harpia	2015-02-06	EUPRUF
Harpia	2015-02-06	TANSPP
Harpia	2015-02-06	TANSPP
Harpia	2015-02-06	TANSPP
Harpia	2015-02-06	TANSPP
Harpia	2015-02-06	TANSPP
Harpia	2015-02-06	ANCSTR
Harpia	2015-02-06	HERDUG
Harpia	2015-02-06	MONMOR
Harpia	2015-02-06	MONMOR
Harpia	2015-02-06	MONMOR
Harpia	2015-02-06	CAPNIG
Harpia	2015-02-06	MITSAL
Harpia	2015-02-06	HYLPOE
Harpia	2015-02-06	HYLPOE
Harpia	2015-02-06	CAMRUB
Harpia	2015-02-06	TANNIG
Harpia	2015-02-06	TANNIG
Harpia	2015-02-06	TANNIG
Harpia	2015-02-06	PICCHR
Harpia	2015-02-06	LIPVOC
Harpia	2015-02-06	LIPVOC
Harpia	2015-02-06	TROVIR
Harpia	2015-02-06	CAPNIG
Harpia	2015-02-06	CAMRUB
Harpia	2015-02-06	THACAE
Harpia	2015-02-06	RAMTUC
Harpia	2015-02-06	TROMEL
Harpia	2015-02-06	THAFUR
Harpia	2015-02-06	LIPVOC
Harpia	2015-02-06	CAMRUB
Harpia	2015-02-06	HYPCAN
Harpia	2015-02-06	RAMTUC
Harpia	2015-02-06	BUCCAP
Harpia	2015-02-06	PHAMAL
Harpia	2015-02-06	THACAE
Harpia	2015-02-06	MYRMEN
Harpia	2015-02-06	COLPLU
Harpia	2015-02-06	MYRLON
Harpia	2015-02-06	HYLPOE
Harpia	2015-02-06	THASCH
Harpia	2015-02-06	CYMLIN
Harpia	2015-02-06	GALALB
Harpia	2015-02-06	HEMZOS
Harpia	2015-02-06	MELCRU
Harpia	2015-02-06	MELCRU
Harpia	2015-02-06	LIPVOC
Harpia	2015-02-06	PIPERY
Harpia	2015-02-06	PIPERY
Harpia	2015-02-06	THACAE
Harpia	2015-02-06	COLPLU
Harpia	2015-02-24	AUTINF
Harpia	2015-02-24	CELGRA
Harpia	2015-02-24	TROMEL
Harpia	2015-02-24	AUTINF
Harpia	2015-02-24	HYLSUB
Harpia	2015-02-24	HYLOCH
Harpia	2015-02-24	MYRAXI
Harpia	2015-02-24	MYRAXI
Harpia	2015-02-24	MYRLON
Harpia	2015-02-24	COLPLU
Harpia	2015-02-24	PITGRO
Harpia	2015-02-24	CAPNIG
Harpia	2015-02-24	TANSPP
Harpia	2015-02-24	TANSPP
Harpia	2015-02-24	TANSPP
Harpia	2015-02-24	DACSPP
Harpia	2015-02-24	DACSPP
Harpia	2015-02-24	PHIERT
Harpia	2015-02-24	PYGSTE
Harpia	2015-02-24	TANCHI
Harpia	2015-02-24	TANCHI
Harpia	2015-02-24	TANCHI
Harpia	2015-02-24	TANCHI
Harpia	2015-02-24	HYLNAE
Harpia	2015-02-24	HYLNAE
Harpia	2015-02-24	TOLASS
Harpia	2015-02-24	PIPERY
Harpia	2015-02-24	PSOCRE
Harpia	2015-02-24	PSOCRE
Harpia	2015-02-24	COLPLU
Harpia	2015-02-24	MYRBRA
Harpia	2015-02-24	MYRBRA
Harpia	2015-02-24	MIOOLE
Harpia	2015-02-24	HYLNAE
Harpia	2015-02-24	HYPCAN
Harpia	2015-02-24	CHIPAR
Harpia	2015-02-24	CHIPAR
Harpia	2015-02-24	CHIPAR
Harpia	2015-02-24	LOPVIT
Harpia	2015-02-24	PSAANG
Harpia	2015-02-24	PLACOR
Harpia	2015-02-24	CAMMEL
Harpia	2015-02-24	CERCIN
Harpia	2015-02-24	CELGRA
Harpia	2015-02-24	HYLNAE
Harpia	2015-02-24	MYRBRA
Harpia	2015-02-24	PIPCOR
Harpia	2015-02-24	CHIPAR
Harpia	2015-02-24	CHIPAR
Harpia	2015-02-24	RAMTUC
Harpia	2015-02-24	PIPCOR
Harpia	2015-02-24	PIPCOR
Harpia	2015-02-24	PIPERY
Harpia	2015-02-24	PIPERY
Harpia	2015-02-24	PHABOU
Harpia	2015-02-24	PIPCOR
Harpia	2015-02-24	PIACAY
Harpia	2015-02-24	ANCSTR
Harpia	2015-02-24	HYLPOE
Harpia	2015-02-24	PHABOU
Harpia	2015-02-24	PHABOU
Harpia	2015-02-24	MYRBRA
Harpia	2015-02-24	THAFUR
Harpia	2015-02-24	CELGRA
Harpia	2015-02-24	SELREI
Harpia	2015-02-24	COLPLU
Harpia	2015-02-23	COLPLU
Harpia	2015-02-23	HYLNAE
Harpia	2015-02-23	SELREI
Harpia	2015-02-23	HYLNAE
Harpia	2015-02-23	GLYSPI
Harpia	2015-02-23	MYRBRA
Harpia	2015-02-23	PITGRO
Harpia	2015-02-23	THAMUR
Harpia	2015-02-23	PHIPYR
Harpia	2015-02-23	HYLHYP
Harpia	2015-02-23	HYLHYP
Harpia	2015-02-23	HYLNAE
Harpia	2015-02-23	SELREI
Harpia	2015-02-23	SELREI
Harpia	2015-02-23	RAMMEL
Harpia	2015-02-23	VIROLI
Harpia	2015-02-23	VIROLI
Harpia	2015-02-23	MELCRU
Harpia	2015-02-23	MYRBRA
Harpia	2015-02-23	XIPPRO
Harpia	2015-02-23	THAMUR
Harpia	2015-02-23	TROMEL
Harpia	2015-02-23	THASCH
Harpia	2015-02-23	RAMMEL
Harpia	2015-02-23	PIPCOR
Harpia	2015-02-23	MYITUB
Harpia	2015-02-23	CERCIN
Harpia	2015-02-23	HYLPOE
Harpia	2015-02-23	CERCIN
Harpia	2015-02-23	GEOMON
Harpia	2015-02-23	EUPXAN
Harpia	2015-02-23	SELREI
Harpia	2015-02-23	CYMLIN
Harpia	2015-02-23	PYGSTE
Harpia	2015-02-23	LOPCRI
Harpia	2015-02-23	PTEPLU
Harpia	2015-02-23	PTEPLU
Harpia	2015-02-23	AUTMEL
Harpia	2015-02-23	HYLSUB
Harpia	2015-02-23	MYRMEN
Harpia	2015-02-23	RAMMEL
Harpia	2015-02-23	HYPCAN
Harpia	2015-02-23	GLYSPI
Harpia	2015-02-23	CERCIN
Harpia	2015-02-23	XIPGUT
Harpia	2015-02-23	MYRMYO
Harpia	2015-02-23	MYRMYO
Harpia	2015-02-23	XIPGUT
Harpia	2015-02-23	PSADEC
Harpia	2015-02-23	CACCEL
Harpia	2015-02-23	HYLNAE
Harpia	2015-02-23	PHIPYR
Harpia	2015-02-23	AUTINF
Harpia	2015-02-23	HYLNAE
Harpia	2015-02-23	SCLCAU
Harpia	2015-02-23	PHAMAL
Harpia	2015-02-23	MYRERY
Harpia	2015-02-23	GLYSPI
Harpia	2015-02-23	TYRSTO
Harpia	2015-02-23	CHIPAR
Harpia	2015-02-23	CHIPAR
Harpia	2015-02-23	LOPVIT
Harpia	2015-02-23	MYRMYO
Harpia	2015-02-23	RAMVIT
Harpia	2015-02-23	RAMVIT
Harpia	2015-02-23	COLPLU
Harpia	2015-02-23	TINMAJ
Harpia	2015-02-23	COLPLU
Harpia	2015-02-23	TURLAW
Harpia	2015-02-23	EUPXAN
Harpia	2015-02-23	THAMUR
Harpia	2015-02-23	HYLHYP
Harpia	2015-02-23	HYLHYP
Harpia	2015-02-23	GALALB
Harpia	2015-02-23	PHAMAL
Harpia	2015-02-23	DACSPP
Harpia	2015-02-23	DACSPP
Harpia	2015-02-23	TROVIR
Harpia	2015-02-23	THAMUR
Harpia	2015-02-23	PHIPYR
Harpia	2015-02-23	MELCRU
Harpia	2015-02-23	MELCRU
Harpia	2015-02-23	GALALB
Harpia	2015-02-23	TROMEL
Harpia	2015-02-23	PSOCRE
Harpia	2015-02-23	PSOCRE
Harpia	2015-02-23	TANSPP
Harpia	2015-02-23	TANSPP
Harpia	2015-02-23	TANSPP
Harpia	2015-02-23	TANSPP
Harpia	2015-02-23	TROMEL
Harpia	2015-02-23	MELCRU
Harpia	2015-02-23	HYLPOE
Harpia	2015-02-23	QUEPUR
Harpia	2015-02-23	QUEPUR
Harpia	2015-02-23	AUTINF
Harpia	2015-02-23	CORTOR
Harpia	2015-02-23	CAMMEL
Harpia	2015-02-23	PTEPLU
Harpia	2015-02-23	PTEPLU
Harpia	2015-02-23	MYRBRA
Harpia	2015-02-23	LOPVIT
Harpia	2015-02-23	CHIPAR
Harpia	2015-02-23	CHIPAR
Harpia	2015-02-23	RAMVIT
Harpia	2015-02-23	RAMVIT
Harpia	2015-02-23	ATISPA
Harpia	2015-02-23	AUTRUB
Harpia	2015-02-23	CAMMEL
Harpia	2015-02-23	PIOMEL
Harpia	2015-02-23	SELREI
Harpia	2015-02-23	SELREI
Harpia	2015-02-23	THRCOR
Harpia	2015-02-23	THRCOR
Harpia	2015-02-23	SELREI
Harpia	2015-02-23	THACAE
Harpia	2015-02-23	THACAE
Harpia	2015-02-23	PIOMEL
Harpia	2015-02-23	PIOMEL
Harpia	2015-02-23	PSADEC
Harpia	2015-02-23	THASCH
Harpia	2015-02-23	MYRLON
Harpia	2015-02-23	MYRLON
Harpia	2015-02-23	CYMLIN
Harpia	2015-02-23	HYLOCH
Harpia	2015-02-23	EUPLAN
Harpia	2015-02-23	PENJAC
Harpia	2015-02-23	PENJAC
Harpia	2015-02-23	PIOMEL
Harpia	2015-02-23	PIOMEL
Harpia	2015-02-23	CYMLIN
Harpia	2015-02-23	PIOMEL
Harpia	2015-02-23	PIOMEL
Harpia	2015-02-23	PSADEC
Harpia	2015-02-23	AMAFAR
Harpia	2015-02-23	AMAFAR
Harpia	2015-02-23	CHANOB
Harpia	2015-02-23	CAPNIG
Harpia	2015-02-23	CAMMEL
Harpia	2015-02-23	CAMMEL
Harpia	2015-02-23	LEGLEU
Harpia	2015-02-23	LEGLEU
Harpia	2015-02-23	SCLCAU
Harpia	2015-02-23	CAMMEL
Harpia	2015-02-23	COLPLU
Harpia	2015-02-23	COLPLU
Harpia	2015-02-23	XIPGUT
Harpia	2015-02-23	TANCHI
Harpia	2015-02-23	TANCHI
Harpia	2015-02-23	PENJAC
Harpia	2015-02-23	HEMZOS
Harpia	2015-02-23	PIPCOR
Harpia	2015-02-23	CHIPAR
Harpia	2015-02-23	CHIPAR
Harpia	2015-02-23	PIPCOR
Harpia	2015-02-23	HYLPOE
Harpia	2015-02-23	HYLPOE
Harpia	2015-02-23	CHIPAR
Harpia	2015-02-23	MYRMYO
Harpia	2015-02-24	NYCOCE
Harpia	2015-02-24	HYLPOE
Harpia	2015-02-24	THAMUR
Harpia	2015-02-24	XIPGUT
Harpia	2015-02-24	PHONIG
Harpia	2015-02-24	DENRUF
Harpia	2015-02-24	PHIPYR
Harpia	2015-02-24	HYLPOE
Harpia	2015-02-24	THAMUR
Harpia	2015-02-24	SCLCAU
Harpia	2015-02-24	PIPCOR
Harpia	2015-02-24	CERCIN
Harpia	2015-02-24	CERCIN
Harpia	2015-02-24	RAMVIT
Harpia	2015-02-24	PIPCOR
Harpia	2015-02-24	COLPLU
Harpia	2015-02-24	HYPCAN
Harpia	2015-02-24	RHEMEL
Harpia	2015-02-24	DECLON
Harpia	2015-02-24	RHEMEL
Harpia	2015-02-24	CAMMEL
Harpia	2015-02-24	THRCOR
Harpia	2015-02-24	THRCOR
Harpia	2015-02-24	FORCOL
Harpia	2015-02-24	THAMUR
Harpia	2015-02-24	CHIPAR
Harpia	2015-02-24	QUEPUR
Harpia	2015-02-24	QUEPUR
Harpia	2015-02-24	COLPLU
Harpia	2015-02-24	MELCRU
Harpia	2015-02-24	MELCRU
Harpia	2015-02-24	DENRUF
Harpia	2015-02-24	HYLNAE
Harpia	2015-02-24	MYRBRA
Harpia	2015-02-24	MYICAN
Harpia	2015-02-24	THAMUR
Harpia	2015-02-24	AUTRUB
Harpia	2015-02-24	TINMAJ
Harpia	2015-02-24	XIPGUT
Harpia	2015-02-24	THASCH
Harpia	2015-02-24	CYMLIN
Harpia	2015-02-24	THACAE
Harpia	2015-02-24	THASCH
Harpia	2015-02-24	MYRMEN
Harpia	2015-02-24	MYRERY
Harpia	2015-02-24	QUEPUR
Harpia	2015-02-24	QUEPUR
Harpia	2015-02-24	MYRERY
Harpia	2015-02-24	THACAE
Harpia	2015-02-24	THAARD
Harpia	2015-02-24	MYRERY
Harpia	2015-02-24	HYLOCH
Harpia	2015-02-24	MYRLON
Harpia	2015-02-24	MYRLON
Harpia	2015-02-24	ANCSTR
Harpia	2015-02-24	PYGSTE
Harpia	2015-02-24	TOLASS
Harpia	2015-02-24	TYRSTO
Harpia	2015-02-24	PHIERY
Harpia	2015-02-24	PIOMEN
Harpia	2015-02-24	COLPLU
Harpia	2015-02-24	THAMUR
Harpia	2015-02-24	CHIPAR
Harpia	2015-02-24	MYRHAU
Harpia	2015-02-24	PHAMAL
Harpia	2015-02-24	SELREI
Harpia	2015-02-24	SELREI
Harpia	2015-02-24	COLPLU
Harpia	2015-02-24	MYRFJE
Harpia	2015-02-24	TYRSTO
Harpia	2015-02-24	Unkwp
Harpia	2015-02-24	RAMTUC
Harpia	2015-02-24	RAMTUC
Harpia	2015-02-24	RAMMEL
Harpia	2015-02-24	COLPLU
Harpia	2015-02-24	MELCRU
Harpia	2015-02-24	EUPLAN
Harpia	2015-02-24	CAMRUB
Harpia	2015-02-24	COLPLU
Harpia	2015-02-24	RAMTUC
Harpia	2015-02-24	HYLPOE
Harpia	2015-02-24	PIPCOR
Harpia	2015-02-24	XIPGUT
Harpia	2015-02-24	CHIPAR
Harpia	2015-02-24	CAMRUB
Harpia	2013-02-02	NYCAET
Harpia	2013-02-02	NOTURU
Harpia	2013-02-02	CICHUH
Harpia	2013-02-02	BARMAR
Harpia	2013-02-02	NYCOCE
Harpia	2013-02-02	NYCAET
Harpia	2013-02-02	OTUWAT
Harpia	2013-02-02	HYLSUB
Harpia	2013-02-02	MICGIL
Harpia	2013-02-02	BARMAR
Harpia	2013-02-02	XIPGUT
Harpia	2013-02-02	ATISPA
Harpia	2013-02-02	DENRUF
Harpia	2013-02-02	AUTINF
Harpia	2013-02-02	MYRFOR
Harpia	2013-02-02	ELEPLA
Harpia	2013-02-02	HYLSUB
Harpia	2013-02-02	ELEPLA
Harpia	2013-02-02	AUTINF
Harpia	2013-02-02	LIOTHO
Harpia	2013-02-02	BARMAR
Harpia	2013-02-02	HYLPOE
Harpia	2013-02-02	AUTMEL
Harpia	2013-02-03	CERCIN
Harpia	2013-02-03	CAMMEL
Harpia	2013-02-03	GLYSPI
Harpia	2013-02-03	UNK
Harpia	2013-02-03	LOPVIT
Harpia	2013-02-03	HENLEU
Harpia	2013-02-03	MIOOLE
Harpia	2013-02-03	MITSAL
Harpia	2013-02-03	MITSAL
Harpia	2013-02-03	RAMMEL
Harpia	2013-02-03	XIPGUT
Harpia	2013-02-03	THAMUR
Harpia	2013-02-03	THASCH
Harpia	2013-02-03	COLPLU
Harpia	2013-02-03	CYMLIN
Harpia	2013-02-03	CERCIN
Harpia	2013-02-03	MYICAN
Harpia	2013-02-03	XIPGUT
Harpia	2013-02-03	COLPLU
Harpia	2013-02-03	MYRBRA
Harpia	2013-02-03	COLPLU
Harpia	2013-02-03	GEOMON
Harpia	2013-02-03	THACAE
Harpia	2013-02-03	CERCIN
Harpia	2013-02-03	LOPVIT
Harpia	2013-02-03	UNK
Harpia	2013-02-03	XENMIN
Harpia	2013-02-03	MYIBAR
Harpia	2013-02-03	HYPCAN
Harpia	2013-02-03	HYPCAN
Harpia	2013-02-03	MYRMYO
Harpia	2013-02-03	CAPNIG
Harpia	2013-02-03	CERCIN
Harpia	2013-02-03	HYLPOE
Harpia	2013-02-02	AMAFAR
Harpia	2013-02-02	UNK
Harpia	2013-02-02	EUBRIC
Harpia	2013-02-02	GLYSPI
Harpia	2013-02-02	PIPCHL
Harpia	2013-02-02	THAMUR
Harpia	2013-02-02	TANSCH
Harpia	2013-02-02	TANSCH
Harpia	2013-02-02	TANSCH
Harpia	2013-02-02	PYGSTE
Harpia	2013-02-02	RAMTUC
Harpia	2013-02-02	LIOTHO
Harpia	2013-02-02	CERCIN
Harpia	2013-02-02	MYRCAM
Harpia	2013-02-02	MYRMYO
Harpia	2013-02-02	COLPLU
Harpia	2013-02-02	TURALB
Harpia	2013-02-02	COLPLU
Harpia	2013-02-02	QUEPUR
Harpia	2013-02-02	QUEPUR
Harpia	2013-02-02	PITGRO
Harpia	2013-02-02	CERCIN
Harpia	2013-02-02	MYRMYO
Harpia	2013-02-02	UNK
Harpia	2013-02-02	PHAMAL
Harpia	2013-02-02	CYACAE
Harpia	2013-02-02	CYACAE
Harpia	2013-02-02	PIPCOR
Harpia	2013-02-02	CERCIN
Harpia	2013-02-02	MYRAXI
Harpia	2013-02-02	GLYSPI
Harpia	2013-02-02	AMAFAR
Harpia	2013-02-02	HYLPOE
Harpia	2013-02-02	AMAFAR
Harpia	2013-02-02	AMAFAR
Harpia	2013-02-02	PITGRO
Harpia	2013-02-02	XIPGUT
Harpia	2013-02-02	GLYSPI
Harpia	2013-02-02	PHAMAL
Harpia	2013-02-02	RAMTUC
Harpia	2013-02-02	UNK
Harpia	2013-02-02	HYLPOE
Harpia	2013-02-02	AUTINF
Harpia	2013-02-02	CAPNIG
Harpia	2013-02-02	CYMLIN
Harpia	2013-02-02	CAMMEL
Harpia	2013-02-02	PHAMAL
Harpia	2013-02-02	GLYSPI
Harpia	2013-02-02	CYMLIN
Harpia	2013-02-02	HYLPOE
Harpia	2013-02-02	CAPNIG
Harpia	2013-02-02	RAMMEL
Harpia	2013-02-02	RAMTUC
Harpia	2013-02-02	BROCYA
Harpia	2013-02-02	RAMTUC
Harpia	2013-02-02	PHAMAL
Harpia	2013-02-02	MYRMYO
Harpia	2013-02-02	LIOTHO
Harpia	2013-02-02	PHONIG
Harpia	2013-02-02	PITGRO
Harpia	2013-02-02	THASCH
Harpia	2013-02-02	THASCH
Harpia	2013-02-02	MYRMYO
Harpia	2013-02-02	RAMMEL
Harpia	2013-02-02	RAMVIT
Harpia	2013-02-02	MYRMYO
Harpia	2013-02-02	CHANOB
Harpia	2013-02-02	MYRBRA
Harpia	2013-02-02	QUEPUR
Harpia	2013-02-02	QUEPUR
Harpia	2013-02-02	COLPLU
Harpia	2013-02-02	MYRCAM
Harpia	2013-02-02	PHAMAL
Harpia	2013-02-02	MYRHAU
Harpia	2013-02-02	MYRHAU
Harpia	2013-02-02	PIPCHL
Harpia	2013-02-02	CAPNIG
Harpia	2013-02-02	RAMVIT
Harpia	2013-02-02	VENAFF
Harpia	2013-02-02	CAPNIG
Harpia	2013-02-02	MYRCAM
Harpia	2013-02-02	MYRMEN
Harpia	2013-02-02	CAMMEL
Harpia	2013-02-02	BARMAR
Harpia	2013-02-02	PHONIG
Harpia	2013-02-02	CHIPAR
Harpia	2013-02-02	LIOTHO
Harpia	2013-02-02	MYRMYO
Harpia	2013-02-02	THRCOR
Harpia	2013-02-02	ATISPA
Harpia	2013-02-02	MYRMYO
Harpia	2013-02-02	GLYSPI
Harpia	2013-02-02	XIPGUT
Harpia	2013-02-02	HYLPOE
Harpia	2013-02-02	COLPLU
Harpia	2013-02-02	ATISPA
Harpia	2013-02-02	TINMAJ
Harpia	2013-02-02	BARMAR
Harpia	2013-02-02	CERCIN
Harpia	2013-02-02	EUBRIC
Harpia	2013-02-02	PIOMEL
Harpia	2013-02-02	PIOMEL
Harpia	2013-02-02	CHIPAR
Harpia	2013-02-02	TURALB
Harpia	2013-02-02	GLYSPI
Harpia	2013-02-02	TURALB
Harpia	2013-02-02	TYRSTO
Harpia	2013-02-02	THAARD
Harpia	2013-02-02	THACAE
Harpia	2013-02-02	THACAE
Harpia	2013-02-02	CHIPAR
Harpia	2013-02-02	CAPNIG
Harpia	2013-02-02	TANSCH
Harpia	2013-02-02	TANSCH
Harpia	2013-02-02	TANCHI
Harpia	2013-02-02	TANCHI
Harpia	2013-02-02	DACCAY
Harpia	2013-02-02	DACCAY
Harpia	2013-02-02	GLYSPI
Harpia	2013-02-02	PIOMEL
Harpia	2013-02-03	HYLSUB
Harpia	2013-02-03	LIOTHO
Harpia	2013-02-03	CAMMEL
Harpia	2013-02-03	THAMUR
Harpia	2013-02-03	RAMMEL
Harpia	2013-02-03	PICCHR
Harpia	2013-02-03	AMAFAR
Harpia	2013-02-03	COLPLU
Harpia	2013-02-03	TROMEL
Harpia	2013-02-03	CAPNIG
Harpia	2013-02-03	SELREI
Harpia	2013-02-03	MYRHAU
Harpia	2013-02-03	MYRHAU
Harpia	2013-02-03	HYLOCH
Harpia	2013-02-03	HYLOCH
Harpia	2013-02-03	MYRAXI
Harpia	2013-02-03	MYRLON
Harpia	2013-02-03	MYRLON
Harpia	2013-02-03	THACAE
Harpia	2013-02-03	THACAE
Harpia	2013-02-03	PHAMAL
Harpia	2013-02-03	HYLSUB
Harpia	2013-02-03	MICMAR
Harpia	2013-02-03	CAMMEL
Harpia	2013-02-03	CAMMEL
Harpia	2013-02-03	ATISPA
Harpia	2013-02-03	PHAMAL
Harpia	2013-02-03	CAPNIG
Harpia	2013-02-03	AMAFAR
Harpia	2013-02-03	AMAFAR
Harpia	2013-02-03	PIOMEL
Harpia	2013-02-03	QUEPUR
Harpia	2013-02-03	QUEPUR
Harpia	2013-02-03	CRYVAR
Harpia	2013-02-03	XIPGUT
Harpia	2013-02-03	PHONIG
Harpia	2013-02-03	ATISPA
Harpia	2013-02-03	GLYSPI
Harpia	2013-02-03	RAMTUC
Harpia	2013-02-03	RAMTUC
Harpia	2013-02-03	HYLPOE
Harpia	2013-02-03	PIPPIP
Harpia	2013-02-03	PIPPIP
Harpia	2013-02-03	CAPNIG
Harpia	2013-02-03	XIPGUT
Harpia	2013-02-03	TYRSTO
Harpia	2013-02-03	LIOTHO
Harpia	2013-02-03	PIPPIP
Harpia	2013-02-03	UNK
Harpia	2013-02-03	PIOMEN
Harpia	2013-02-03	CAMRUB
Harpia	2013-02-03	CAMRUB
Harpia	2013-02-03	HYLPOE
Harpia	2013-02-03	PIPPIP
Harpia	2013-02-03	PIPPIP
Harpia	2013-02-03	GLYSPI
Harpia	2013-02-03	GYMLEU
Harpia	2013-02-03	GYMLEU
Harpia	2013-02-03	GYMLEU
Harpia	2013-02-03	GEOMON
Harpia	2013-02-03	RAMVIT
Harpia	2013-02-03	RAMVIT
Harpia	2013-02-03	RAMVIT
Harpia	2013-02-03	RAMVIT
Harpia	2013-02-03	THAMUR
Harpia	2013-02-03	CELGRA
Harpia	2013-02-03	CAPNIG
Harpia	2013-02-03	PSAANG
Harpia	2013-02-03	GEOMON
Harpia	2013-02-03	MYRLON
Harpia	2013-02-03	HYLHYP
Harpia	2013-02-03	CAPNIG
Harpia	2013-02-03	PIPCOR
Harpia	2013-02-03	UNKHUM
Harpia	2013-02-03	MYRLON
Harpia	2013-02-03	CERCIN
Harpia	2013-02-03	CHIPAR
Harpia	2013-02-03	PIPCHL
Harpia	2013-02-03	CAPNIG
Harpia	2013-02-03	TINMAJ
Harpia	2013-02-03	GLYSPI
Harpia	2013-02-03	THAFUR
Harpia	2013-02-03	CHIPAR
Harpia	2013-02-03	CHIPAR
Harpia	2013-02-03	OTUWAT
Harpia	2013-02-03	XIPGUT
Harpia	2013-02-03	HYLSUB
Harpia	2013-02-03	BARMAR
Harpia	2013-02-03	XIPGUT
Harpia	2013-02-03	ATISPA
Harpia	2013-02-03	CYMLIN
Harpia	2013-02-03	MYRFOR
Harpia	2013-02-03	MYRCAM
Harpia	2013-02-03	LIOTHO
Harpia	2013-02-03	HYLSUB
Harpia	2013-02-03	MYRAXI
Harpia	2013-02-03	CERCIN
Harpia	2013-02-03	THACAE
Harpia	2013-02-03	GLYSPI
Harpia	2013-02-03	RAMTUC
Harpia	2013-02-03	XIPGUT
Harpia	2013-02-04	HYLSUB
Harpia	2013-02-04	ABUCUM
Harpia	2013-02-04	UNKWP
Harpia	2013-02-04	MYRCAM
Harpia	2013-02-04	THASCH
Harpia	2013-02-04	THASCH
Harpia	2013-02-04	CERCIN
Harpia	2013-02-04	MYIGAI
Harpia	2013-02-04	CELGRA
Harpia	2013-02-04	XIPGUT
Harpia	2013-02-04	XIPGUT
Harpia	2013-02-04	PHONIG
Harpia	2013-02-04	CERCIN
Harpia	2013-02-04	LIOTHO
Harpia	2013-02-04	CAPNIG
Harpia	2013-02-04	DENCER
Harpia	2013-02-04	ARAMAC
Harpia	2013-02-04	MYRBRA
Harpia	2013-02-04	MYRBRA
Harpia	2013-02-04	PHONIG
Harpia	2013-02-04	TINGUT
Harpia	2013-02-04	TYRSTO
Harpia	2013-02-04	PHONIG
Harpia	2013-02-04	PYGSTE
Harpia	2013-02-04	MYRBRA
Harpia	2013-02-04	LIOTHO
Harpia	2013-02-04	CAPNIG
Harpia	2013-02-04	CYMLIN
Harpia	2013-02-04	RAMMEL
Harpia	2013-02-04	CERCIN
Harpia	2013-02-04	CERCIN
Harpia	2013-02-04	TYRSTO
Harpia	2013-02-04	PIPPIP
Harpia	2013-02-04	THAMUR
Harpia	2013-02-04	THAMUR
Harpia	2013-02-04	PIPPIP
Harpia	2013-02-04	CERCIN
Harpia	2013-02-04	RAMMEL
Harpia	2013-02-04	CYMLIN
Harpia	2013-02-04	RAMTUC
Harpia	2013-02-04	MYRMYO
Harpia	2013-02-04	CYMLIN
Harpia	2013-02-04	XIPOCE
Harpia	2013-02-04	THACAE
Harpia	2013-02-04	THACAE
Harpia	2013-02-04	MYRFJE
Harpia	2013-02-04	MYRERY
Harpia	2013-02-04	MYRFJE
Harpia	2013-02-04	CAPNIG
Harpia	2013-02-04	CELGRA
Harpia	2013-02-04	LIPVOC
Harpia	2013-02-04	THASCH
Harpia	2013-02-04	CELGRA
Harpia	2013-02-04	MYRFOR
Harpia	2013-02-04	LIPVOC
Harpia	2013-02-04	THASCH
Harpia	2013-02-04	MYRMYO
Harpia	2013-02-04	GLYSPI
Harpia	2013-02-04	PIPPIP
Harpia	2013-02-04	PIPPIP
Harpia	2013-02-04	LIPVOC
Harpia	2013-02-04	MYRFOR
Harpia	2013-02-04	XIPGUT
Harpia	2013-02-04	HYLNAE
Harpia	2013-02-04	PENJAC
Harpia	2013-02-04	CAPNIG
Harpia	2013-02-04	LIPVOC
Harpia	2013-02-04	RAMVIT
Harpia	2013-02-04	RAMTUC
Harpia	2013-02-04	GEOMON
Harpia	2013-02-04	LOPVIT
Harpia	2013-02-04	CAPNIG
Harpia	2013-02-04	PHONIG
Harpia	2013-02-04	HYLOCH
Harpia	2013-02-04	HYLOCH
Harpia	2013-02-04	CERCIN
Harpia	2013-02-04	RAMVIT
Harpia	2013-02-04	MYRBRA
Harpia	2013-02-04	COLPLU
Harpia	2013-02-04	LIPVOC
Harpia	2013-02-04	CAPNIG
Harpia	2013-02-04	BROCYA
Harpia	2013-02-04	GLYSPI
Harpia	2013-02-04	NASLON
Harpia	2013-02-04	HYLNAE
Harpia	2013-02-04	CAPNIG
Harpia	2013-02-04	TINMAJ
Harpia	2013-02-04	MYRMYO
Harpia	2013-02-04	CERCIN
Harpia	2013-02-04	XIPGUT
Harpia	2013-02-04	TROVIR
Harpia	2013-02-04	PHAMAL
Harpia	2013-02-04	EUPXAN
Harpia	2013-02-04	HYLNAE
Harpia	2013-02-04	MYRBRA
Harpia	2013-02-04	PIPERY
Harpia	2013-02-04	CERCIN
Harpia	2013-02-04	COLPLU
Harpia	2013-02-04	COLPLU
Harpia	2013-02-04	CAPNIG
Harpia	2013-02-04	HYLOCH
Harpia	2013-02-04	HYLHYP
Harpia	2013-02-04	GLYSPI
Harpia	2013-02-04	MYRLON
Harpia	2013-02-04	MYRLON
Harpia	2013-02-04	HYLHYP
Harpia	2013-02-04	PHONIG
Harpia	2013-02-04	RAMTUC
Harpia	2013-02-04	DENCER
Harpia	2013-02-04	HYLNAE
Harpia	2013-02-04	BROCYA
Harpia	2013-02-04	BROCYA
Harpia	2013-02-04	BROCYA
Harpia	2013-02-04	TROVIR
Harpia	2013-02-04	MYRLON
Harpia	2013-02-04	PHONIG
Harpia	2013-02-06	PIPCOR
Harpia	2013-02-06	CAMTUR
Harpia	2013-02-06	CAMTUR
Harpia	2013-02-06	TANSPP
Harpia	2013-02-06	TANSPP
Harpia	2013-02-06	THRCOR
Harpia	2013-02-06	THRCOR
Harpia	2013-02-06	CYACYA
Harpia	2013-02-06	AUTRUB
Harpia	2013-02-06	THAMUR
Harpia	2013-02-06	RAMTUC
Harpia	2013-02-06	XIPGUT
Harpia	2013-02-06	CAMTUR
Harpia	2013-02-06	CAMTUR
Harpia	2013-02-06	TOLASS
Harpia	2013-02-06	RAMTUC
Harpia	2013-02-06	RAMTUC
Harpia	2013-02-06	LOPVIT
Harpia	2013-02-06	COLPLU
Harpia	2013-02-06	LOPVIT
Harpia	2013-02-06	CAMMEL
Harpia	2013-02-06	CAMMEL
Harpia	2013-02-06	LOPVIT
Harpia	2013-02-06	PSAVIR
Harpia	2013-02-06	AUTINF
Harpia	2013-02-06	PYGSTE
Harpia	2013-02-06	AUTINF
Harpia	2013-02-06	TYRSTO
Harpia	2013-02-06	HYLPOE
Harpia	2013-02-06	CHIPAR
Harpia	2013-02-06	CHIPAR
Harpia	2013-02-06	THAFUR
Harpia	2013-02-06	CAMTUR
Harpia	2013-02-06	CAMTUR
Harpia	2013-02-06	COLPLU
Harpia	2013-02-06	SCLRUF
Harpia	2013-02-06	HYLNAE
Harpia	2013-02-06	HYLNAE
Harpia	2013-02-06	AUTINF
Harpia	2013-02-06	THAMUR
Harpia	2013-02-06	THAMUR
Harpia	2013-02-06	XIPGUT
Harpia	2013-02-06	TYRSTO
Harpia	2013-02-06	THACAE
Harpia	2013-02-06	MIOOLE
Harpia	2013-02-06	XENMIN
Harpia	2013-02-06	CAMMEL
Harpia	2013-02-06	PIOMEL
Harpia	2013-02-06	PIOMEL
Harpia	2013-02-06	PIOMEL
Harpia	2013-02-06	MYRFOR
Harpia	2013-02-06	HYLSUB
Harpia	2013-02-06	PYGSTE
Harpia	2013-02-06	MYIGAI
Harpia	2013-02-06	AUTINF
Harpia	2013-02-06	CERCIN
Harpia	2013-02-06	PIPCOR
Harpia	2013-02-06	CAMTUR
Harpia	2013-02-06	CAMTUR
Harpia	2013-02-06	PSAVIR
Harpia	2013-02-06	XIPGUT
Harpia	2013-02-06	GLYSPI
Harpia	2013-02-06	HYLPOE
Harpia	2013-02-06	XIPOBS
Harpia	2013-02-06	LOPVIT
Harpia	2013-02-06	CAMMEL
Harpia	2013-02-06	XIPGUT
Harpia	2013-02-06	MYRFOR
Harpia	2013-02-06	THAMUR
Harpia	2013-02-06	PYGSTE
Harpia	2013-02-06	LIOTHO
Harpia	2013-02-06	RAMMEL
Harpia	2013-02-06	LIOTHO
Harpia	2013-02-06	MYRBRA
Harpia	2013-02-06	THACAE
Harpia	2013-02-06	THACAE
Harpia	2013-02-06	MYRLON
Harpia	2013-02-06	MYRLON
Harpia	2013-02-06	TITCAY
Harpia	2013-02-06	TITCAY
Harpia	2013-02-06	PSAVIR
Harpia	2013-02-06	RAMTUC
Harpia	2013-02-06	DRYLIN
Harpia	2013-02-06	COLPLU
Harpia	2013-02-06	THRCOR
Harpia	2013-02-06	THRCOR
Harpia	2013-02-06	MYRMYO
Harpia	2013-02-06	RAMTUC
Harpia	2013-02-06	LIOTHO
Harpia	2013-02-06	SELREI
Harpia	2013-02-06	CHIPAR
Harpia	2013-02-06	CHIPAR
Harpia	2013-02-06	PYGSTE
Harpia	2013-02-06	TYRSTO
Harpia	2013-02-06	BARMAR
Harpia	2013-02-06	TURLAW
Harpia	2013-02-06	COLPLU
Harpia	2013-02-06	TROVIR
Harpia	2013-02-06	TROVIR
Harpia	2013-02-06	COLPLU
Harpia	2013-02-06	MELCRU
Harpia	2013-02-06	PHAMAL
Harpia	2013-02-06	CYAVIO
Harpia	2013-02-06	CYAVIO
Harpia	2013-02-06	COLPLU
Harpia	2013-02-06	LIOTHO
Harpia	2013-02-06	CAMTUR
Harpia	2013-02-06	CYAVIO
Harpia	2013-02-06	TITCAY
Harpia	2013-02-06	BROCYA
Harpia	2013-02-06	BROCYA
Harpia	2013-02-06	COLPLU
Harpia	2013-02-06	PITGRO
Harpia	2013-02-06	CACCEL
Harpia	2013-02-06	THAMUR
Harpia	2013-02-06	HYLHYP
Harpia	2013-02-06	HYLHYP
Harpia	2013-02-06	CYAVIO
Harpia	2013-02-06	PTEPLU
Harpia	2013-02-06	PTEPLU
Harpia	2013-02-06	PTEPLU
Harpia	2013-02-06	PTEPLU
Harpia	2013-02-06	PTEPLU
Harpia	2013-02-06	PTEPLU
Harpia	2013-02-06	HYLNAE
Harpia	2013-02-06	AUTRUB
Harpia	2013-02-06	COLPLU
Harpia	2013-02-06	PITGRO
Harpia	2013-02-06	GLYSPI
Harpia	2013-02-06	CAMMEL
Harpia	2013-02-06	BROCYA
Harpia	2013-02-06	BROCYA
[truncated: 3,683 more rows]

## Sheet: Puma
PLOT	DATE	ALPHACODE
Puma	2013-03-02	LOPCRI
Puma	2013-03-02	NYCAET
Puma	2013-03-02	OTUWAT
Puma	2013-03-02	CICHUH
Puma	2013-03-02	NYCAET
Puma	2013-03-02	MICGIL
Puma	2013-03-02	MICGIL
Puma	2013-03-02	MICGIL
Puma	2013-03-02	TURALB
Puma	2013-03-02	TURALB
Puma	2013-03-02	XIPGUT
Puma	2013-03-02	DAPAME
Puma	2013-03-02	UNKWP
Puma	2013-03-02	XIPGUT
Puma	2013-03-02	BARMAR
Puma	2013-03-02	THAMUR
Puma	2013-03-02	XIPGUT
Puma	2013-03-02	VENAFF
Puma	2013-03-02	THAMUR
Puma	2013-03-02	BARMAR
Puma	2013-03-02	BARMAR
Puma	2013-03-02	HYLPOE
Puma	2013-03-02	THASCH
Puma	2013-03-02	THASCH
Puma	2013-03-02	MYRERY
Puma	2013-03-02	CERCIN
Puma	2013-03-02	BARMAR
Puma	2013-03-02	CAPNIG
Puma	2013-03-02	CAPNIG
Puma	2013-03-02	CAPNIG
Puma	2013-03-02	HYLHYP
Puma	2013-03-02	HYLHYP
Puma	2013-03-02	MONMOR
Puma	2013-03-02	MONMOR
Puma	2013-03-02	XIPOCE
Puma	2013-03-02	XIPGUT
Puma	2013-03-02	XIPGUT
Puma	2013-03-02	TROMEL
Puma	2013-03-02	MYRAXI
Puma	2013-03-02	MYRAXI
Puma	2013-03-02	PYGSTE
Puma	2013-03-02	THAARD
Puma	2013-03-02	PHIERY
Puma	2013-03-02	THAFUR
Puma	2013-03-02	HYPCAN
Puma	2013-03-02	RAMTUC
Puma	2013-03-02	RAMTUC
Puma	2013-03-02	RAMTUC
Puma	2013-03-02	CORTOR
Puma	2013-03-02	TITCAY
Puma	2013-03-02	XIPSPI
Puma	2013-03-02	GLYSPI
Puma	2013-03-02	BROCYA
Puma	2013-03-02	HYLPOE
Puma	2013-03-02	MYRCAM
Puma	2013-03-02	MYRFOR
Puma	2013-03-02	CYACYA
Puma	2013-03-02	CYACYA
Puma	2013-03-02	MYRBRA
Puma	2013-03-02	MYRBRA
Puma	2013-03-02	THAFUR
Puma	2013-03-02	PIPCOR
Puma	2013-03-02	XIPGUT
Puma	2013-03-02	RAMTUC
Puma	2013-03-02	PITGRO
Puma	2013-03-02	TOLASS
Puma	2013-03-02	MYITUB
Puma	2013-03-02	MYRMYO
Puma	2013-03-02	MYRBRA
Puma	2013-03-02	CAPNIG
Puma	2013-03-02	THACAE
Puma	2013-03-02	XIPGUT
Puma	2013-03-02	PITGRO
Puma	2013-03-02	CAMMEL
Puma	2013-03-02	BARMAR
Puma	2013-03-02	MYRERY
Puma	2013-03-02	MYRERY
Puma	2013-03-02	THASCH
Puma	2013-03-02	CERCIN
Puma	2013-03-02	SCLCAU
Puma	2013-03-02	COLPLU
Puma	2013-03-02	XIPGUT
Puma	2013-03-02	TURALB
Puma	2013-03-02	CAMRUB
Puma	2013-03-02	RAMTUC
Puma	2013-03-02	RAMTUC
Puma	2013-03-02	RAMTUC
Puma	2013-03-02	ATISPA
Puma	2013-03-02	MICMAR
Puma	2013-03-02	MYRBRA
Puma	2013-03-02	PLACOR
Puma	2013-03-02	PHIERT
Puma	2013-03-02	RAMVIT
Puma	2013-03-02	RAMVIT
Puma	2013-03-02	HEMZOS
Puma	2013-03-02	ATISPA
Puma	2013-03-02	CELGRA
Puma	2013-03-02	MICMAR
Puma	2013-03-02	GLYSPI
Puma	2013-03-02	FORANA
Puma	2013-03-02	PLACOR
Puma	2013-03-02	PITGRO
Puma	2013-03-02	COLPLU
Puma	2013-03-02	COLPLU
Puma	2013-03-02	COLPLU
Puma	2013-03-02	GLYSPI
Puma	2013-03-02	MICMAR
Puma	2013-03-02	RAMVIT
Puma	2013-03-02	COLPLU
Puma	2013-03-02	TINMAJ
Puma	2013-03-02	GLYSPI
Puma	2013-03-02	GLYSPI
Puma	2013-03-02	SCHLEU
Puma	2013-03-02	PITGRO
Puma	2013-03-02	EUBRIC
Puma	2013-03-02	EUBRIC
Puma	2013-03-02	TANSCH
Puma	2013-03-02	TANSCH
Puma	2013-03-02	PIPCHL
Puma	2013-03-02	MYRBRA
Puma	2013-03-02	THACAE
Puma	2013-03-02	CAPNIG
Puma	2013-03-02	COLPLU
Puma	2013-03-02	ARAMAC
Puma	2013-03-02	AMAFAR
Puma	2013-03-02	CAPNIG
Puma	2013-03-02	LOPVIT
Puma	2013-03-02	HERDUG
Puma	2013-03-02	CERCIN
Puma	2013-03-02	CERCIN
Puma	2013-03-02	MYICAN
Puma	2013-03-02	MYRCAM
Puma	2013-03-02	XENMIN
Puma	2013-03-02	BARMAR
Puma	2013-03-02	XIPGUT
Puma	2013-03-02	THACAE
Puma	2013-03-02	TOLASS
Puma	2013-03-02	GALALB
Puma	2013-03-02	COLPLU
Puma	2013-03-02	CERCIN
Puma	2013-03-02	PIPCOR
Puma	2013-03-02	AUTMEL
Puma	2013-03-02	GRADIG
Puma	2013-03-02	CELELE
Puma	2013-03-02	PIPCHL
Puma	2013-03-02	PIPCHL
Puma	2013-03-02	PYGSTE
Puma	2013-03-02	SALMAX
Puma	2013-03-02	MYRAXI
Puma	2013-03-02	BROCYA
Puma	2013-03-02	BROCYA
Puma	2013-03-02	AUTMEL
Puma	2013-03-03	CRYVAR
Puma	2013-03-03	PHIERT
Puma	2013-03-03	NYCOCE
Puma	2013-03-03	NASLON
Puma	2013-03-03	HYLPOE
Puma	2013-03-03	GLYSPI
Puma	2013-03-03	TACSUR
Puma	2013-03-03	XIPGUT
Puma	2013-03-03	PYGSTE
Puma	2013-03-03	XIPOBS
Puma	2013-03-03	CYMLIN
Puma	2013-03-03	XIPGUT
Puma	2013-03-03	TOLASS
Puma	2013-03-03	UNKWP
Puma	2013-03-03	HYLNAE
Puma	2013-03-03	HYLHYP
Puma	2013-03-03	CAPNIG
Puma	2013-03-03	HYLNAE
Puma	2013-03-03	MICMAR
Puma	2013-03-03	HYLPOE
Puma	2013-03-03	UNK
Puma	2013-03-03	TANCHI
Puma	2013-03-03	TANCHI
Puma	2013-03-03	TANCHI
Puma	2013-03-03	PHABOU
Puma	2013-03-03	PHABOU
Puma	2013-03-03	TURALB
Puma	2013-03-03	MONMOR
Puma	2013-03-03	MONMOR
Puma	2013-03-03	MONMOR
Puma	2013-03-03	MONMOR
Puma	2013-03-03	TOLASS
Puma	2013-03-03	HYLHYP
Puma	2013-03-03	MYRAXI
Puma	2013-03-03	CAMMEL
Puma	2013-03-03	ARAWED
Puma	2013-03-03	MYRBRA
Puma	2013-03-03	MICMAR
Puma	2013-03-03	PIOMEN
Puma	2013-03-03	TURALB
Puma	2013-03-03	CAMRUB
Puma	2013-03-03	MYRFOR
Puma	2013-03-03	MYRLON
Puma	2013-03-03	PHIERT
Puma	2013-03-03	RAMMEL
Puma	2013-03-03	TURALB
Puma	2013-03-03	MACREG
Puma	2013-03-03	TANSCH
Puma	2013-03-03	TANSCH
Puma	2013-03-03	PICCHR
Puma	2013-03-03	CAMMEL
Puma	2013-03-03	CAMRUB
Puma	2013-03-03	UNK
Puma	2013-03-03	UNK
Puma	2013-03-03	MYRBRA
Puma	2013-03-03	MYRBRA
Puma	2013-03-03	CELGRA
Puma	2013-03-03	MYITUB
Puma	2013-03-03	CYAVIO
Puma	2013-03-03	CYAVIO
Puma	2013-03-03	GLYSPI
Puma	2013-03-03	AUTINF
Puma	2013-03-03	PYGSTE
Puma	2013-03-03	PYGSTE
Puma	2013-03-03	HENLEU
Puma	2013-03-03	BROCYA
Puma	2013-03-03	AUTINF
Puma	2013-03-03	CAMMEL
Puma	2013-03-03	THAARD
Puma	2013-03-03	THACAE
Puma	2013-03-03	XIPGUT
Puma	2013-03-03	MYRAXI
Puma	2013-03-03	THACAE
Puma	2013-03-03	MICCIN
Puma	2013-03-03	MYRMEN
Puma	2013-03-03	MYRAXI
Puma	2013-03-03	PYGSTE
Puma	2013-03-03	MYRORN
Puma	2013-03-03	MYRORN
Puma	2013-03-03	MYRLON
Puma	2013-03-03	MYRERY
Puma	2013-03-03	PHABOU
Puma	2013-03-03	MYRERY
Puma	2013-03-03	MICCIN
Puma	2013-03-03	PHABOU
Puma	2013-03-03	PHIERY
Puma	2013-03-03	HYLOCH
Puma	2013-03-03	PIOMEL
Puma	2013-03-03	PIOMEL
Puma	2013-03-03	GLYSPI
Puma	2013-03-03	PIPPIP
Puma	2013-03-03	PIOMEL
Puma	2013-03-03	PIOMEL
Puma	2013-03-03	PIOMEL
Puma	2013-03-03	PIOMEL
Puma	2013-03-03	GLYSPI
Puma	2013-03-03	PIOMEL
Puma	2013-03-03	PIOMEL
Puma	2013-03-03	COLPLU
Puma	2013-03-03	MICMAR
Puma	2013-03-03	CERCIN
Puma	2013-03-03	CRYVAR
Puma	2013-03-03	THACAE
Puma	2013-03-03	TRORUF
Puma	2013-03-03	PHAMAL
Puma	2013-03-03	CERCIN
Puma	2013-03-03	THAMUR
Puma	2013-03-04	PSOCRE
Puma	2013-03-04	PSOCRE
Puma	2013-03-04	HYLPOE
Puma	2013-03-04	CHIPAR
Puma	2013-03-04	GLYSPI
Puma	2013-03-04	GLYSPI
Puma	2013-03-04	HYLPOE
Puma	2013-03-04	DENRUF
Puma	2013-03-04	XIPGUT
Puma	2013-03-04	SCLCAU
Puma	2013-03-04	GLYSPI
Puma	2013-03-04	SCHLEU
Puma	2013-03-04	PYGSTE
Puma	2013-03-04	DAPAME
Puma	2013-03-04	DAPAME
Puma	2013-03-04	GLYSPI
Puma	2013-03-04	HYLPOE
Puma	2013-03-04	HYLPOE
Puma	2013-03-04	ARAWED
Puma	2013-03-04	SCHLEU
Puma	2013-03-04	AUTMEL
Puma	2013-03-04	GLYSPI
Puma	2013-03-04	AUTINF
Puma	2013-03-04	THACAE
Puma	2013-03-04	THACAE
Puma	2013-03-04	PHIERY
Puma	2013-03-04	PHIERY
Puma	2013-03-04	MYRLON
Puma	2013-03-04	MYRLON
Puma	2013-03-04	POECAP
Puma	2013-03-04	GYMLEU
Puma	2013-03-04	MONMOR
Puma	2013-03-04	MONMOR
Puma	2013-03-04	MONMOR
Puma	2013-03-04	TITCAY
Puma	2013-03-04	TOLASS
Puma	2013-03-04	PHIERT
Puma	2013-03-04	AMAFAR
Puma	2013-03-04	RAMVIT
Puma	2013-03-04	CAMMEL
Puma	2013-03-04	GYMLEU
Puma	2013-03-04	PHARUB
Puma	2013-03-04	PTEPLU
Puma	2013-03-04	PTEPLU
Puma	2013-03-04	PTEPLU
Puma	2013-03-04	HYLOCH
Puma	2013-03-04	XIPGUT
Puma	2013-03-04	POECAP
Puma	2013-03-04	GLYSPI
Puma	2013-03-04	DENCER
Puma	2013-03-04	DENCER
Puma	2013-03-04	HYLHYP
Puma	2013-03-04	EUPRUF
Puma	2013-03-04	THAMUR
Puma	2013-03-04	MYRBRA
Puma	2013-03-04	MYRBRA
Puma	2013-03-04	PHAATR
Puma	2013-03-04	RAMTUC
Puma	2013-03-04	MYRBRA
Puma	2013-03-04	MYRBRA
Puma	2013-03-04	MYRMYO
Puma	2013-03-04	COLPLU
Puma	2013-03-04	THRCOR
Puma	2013-03-04	THRCOR
Puma	2013-03-04	GYMLEU
Puma	2013-03-04	PIPFIL
Puma	2013-03-04	PYGSTE
Puma	2013-03-04	TIGLIN
Puma	2013-03-04	PIPFIL
Puma	2013-03-04	PIPFIL
Puma	2013-03-04	CYMLIN
Puma	2013-03-04	MYRMYO
Puma	2013-03-04	MICMAR
Puma	2013-03-04	CAMMEL
Puma	2013-03-04	CAMMEL
Puma	2013-03-04	AMAFAR
Puma	2013-03-04	AMAFAR
Puma	2013-03-04	AMAFAR
Puma	2013-03-04	THAARD
Puma	2013-03-04	POECAP
Puma	2013-03-04	CERCIN
Puma	2013-03-04	CATUST
Puma	2013-03-04	MYRAXI
Puma	2013-03-04	MYRAXI
Puma	2013-03-04	CAPNIG
Puma	2013-03-04	DAPAME
Puma	2013-03-04	DAPAME
Puma	2013-03-04	CYMLIN
Puma	2013-03-04	PITGRO
Puma	2013-03-04	PHAMAL
Puma	2013-03-04	THAFUR
Puma	2013-03-04	LOPVIT
Puma	2013-03-04	CHANOB
Puma	2013-03-04	COLPLU
Puma	2013-03-04	PITGRO
Puma	2013-03-04	HYLSUB
Puma	2013-03-05	OTUWAT
Puma	2013-03-05	TURALB
Puma	2013-03-05	XIPGUT
Puma	2013-03-05	GEOMON
Puma	2013-03-05	PYGSTE
Puma	2013-03-05	THACAE
Puma	2013-03-05	XIPGUT
Puma	2013-03-05	HYLPOE
Puma	2013-03-05	LIOTHO
Puma	2013-03-05	GRADIG
Puma	2013-03-05	CAPNIG
Puma	2013-03-05	MYRCAM
Puma	2013-03-05	CERCIN
Puma	2013-03-05	CERCIN
Puma	2013-03-05	GLYSPI
Puma	2013-03-05	GYMLEU
Puma	2013-03-05	MYRHAU
Puma	2013-03-05	SCLRUF
Puma	2013-03-05	GLYSPI
Puma	2013-03-05	AUTINF
Puma	2013-03-05	XIPGUT
Puma	2013-03-05	TROVIR
Puma	2013-03-05	HEMFLA
Puma	2013-03-05	HEMFLA
Puma	2013-03-05	LEPALB
Puma	2013-03-05	POLPLU
Puma	2013-03-05	POLPLU
Puma	2013-03-05	EUPXAN
Puma	2013-03-05	EUPXAN
Puma	2013-03-05	TROVIR
Puma	2013-03-05	TROVIR
Puma	2013-03-05	TANSPP
Puma	2013-03-05	TANSPP
Puma	2013-03-05	DACSPP
Puma	2013-03-05	DACSPP
Puma	2013-03-05	HYLHYP
Puma	2013-03-05	HYLHYP
Puma	2013-03-05	MACREG
Puma	2013-03-05	TOLASS
Puma	2013-03-05	THASCH
Puma	2013-03-05	TANSCH
Puma	2013-03-05	TANSCH
Puma	2013-03-05	EUPXAN
Puma	2013-03-05	CAPNIG
Puma	2013-03-05	PSAVIR
Puma	2013-03-05	PSAVIR
Puma	2013-03-05	PIPCOR
Puma	2013-03-05	PIPCOR
Puma	2013-03-05	THASCH
Puma	2013-03-05	THASCH
Puma	2013-03-05	CAPNIG
Puma	2013-03-05	SCHLEU
Puma	2013-03-05	GLYSPI
Puma	2013-03-05	PIACAY
Puma	2013-03-05	PIACAY
Puma	2013-03-05	PSAVIR
Puma	2013-03-05	GRADIG
Puma	2013-03-05	CAPNIG
Puma	2013-03-05	XIPGUT
Puma	2013-03-05	CONVIR
Puma	2013-03-05	MYISIM
Puma	2013-03-05	CERCIN
Puma	2013-03-05	HYLPOE
Puma	2013-03-05	GLYSPI
Puma	2013-03-05	MONMOR
Puma	2013-03-05	MONMOR
Puma	2013-03-05	MONMOR
Puma	2013-03-05	MYRBRA
Puma	2013-03-05	ANCSTR
Puma	2013-03-05	CYACYA
Puma	2013-03-05	MALFUS
Puma	2013-03-05	MYRBRA
Puma	2013-03-05	HYLHYP
Puma	2013-03-05	HYLHYP
Puma	2013-03-05	CYACYA
Puma	2013-03-05	HYLHYP
Puma	2013-03-05	SELREI
Puma	2013-03-05	FORCOL
Puma	2013-03-05	CAPNIG
Puma	2013-03-05	GLYSPI
Puma	2013-03-05	CERCIN
Puma	2013-03-05	RAMTUC
Puma	2013-03-05	HYLPOE
Puma	2013-03-05	XIPGUT
Puma	2013-03-05	HYLPOE
Puma	2013-03-05	THASCH
Puma	2013-03-05	XIPGUT
Puma	2013-03-05	GLYSPI
Puma	2013-03-05	PSAYUR
Puma	2013-03-05	DAPAME
Puma	2013-03-05	DAPAME
Puma	2013-03-05	CERCIN
Puma	2013-03-05	RAMTUC
Puma	2013-03-05	RAMTUC
Puma	2013-03-05	THAFUR
Puma	2013-03-05	THACAE
Puma	2013-03-05	RAMVIT
Puma	2013-03-05	RAMTUC
Puma	2013-03-05	PIPPIP
Puma	2013-03-05	PIPPIP
Puma	2013-03-05	DAPAME
Puma	2013-03-05	RHYSIM
Puma	2013-03-05	RAMVIT
Puma	2013-03-05	MYRBRA
Puma	2013-03-05	RAMVIT
Puma	2013-03-05	TINMAJ
Puma	2013-03-05	RAMTUC
Puma	2013-03-05	XIPGUT
Puma	2013-03-05	MYRAXI
Puma	2013-03-05	GLYSPI
Puma	2013-03-05	MYRLON
Puma	2013-03-05	THAARD
Puma	2013-03-05	TRORUF
Puma	2013-03-05	CAPNIG
Puma	2013-03-05	CERCIN
Puma	2013-03-05	HYLPOE
Puma	2013-03-05	CERCIN
Puma	2013-03-05	MYRCAM
Puma	2013-03-05	PIPCHL
Puma	2013-03-05	HYPCAN
Puma	2013-03-05	TOLPOL
Puma	2013-03-05	CYMLIN
Puma	2013-03-05	XIPGUT
Puma	2013-03-05	MYRORN
Puma	2013-03-05	HYLSUB
Puma	2013-03-05	PHAMAL
Puma	2013-03-05	GYMLEU
Puma	2013-03-05	THASCH
Puma	2013-03-05	TRORUF
Puma	2013-03-05	THACAE
Puma	2013-03-05	THACAE
Puma	2013-03-05	THAARD
Puma	2013-03-05	GYMLEU
Puma	2013-03-05	XIPSPI
Puma	2013-03-05	CERCIN
Puma	2013-03-05	HYLPOE
Puma	2013-03-06	BUCCAP
Puma	2013-03-06	MICRUF
Puma	2013-03-06	XIPGUT
Puma	2013-03-06	DAPAME
Puma	2013-03-06	DAPAME
Puma	2013-03-06	DAPAME
Puma	2013-03-06	NONBRU
Puma	2013-03-06	MYIGAI
Puma	2013-03-06	MYIGAI
Puma	2013-03-06	XIPGUT
Puma	2013-03-06	HYLPOE
Puma	2013-03-06	THASCH
Puma	2013-03-06	CERCIN
Puma	2013-03-06	XIPGUT
Puma	2013-03-06	GLYSPI
Puma	2013-03-06	THAMUR
Puma	2013-03-06	THACAE
Puma	2013-03-06	HYLPOE
Puma	2013-03-06	MYRAXI
Puma	2013-03-06	CERCIN
Puma	2013-03-06	MYRMYO
Puma	2013-03-06	CORTOR
Puma	2013-03-06	GLYSPI
Puma	2013-03-06	CAPNIG
Puma	2013-03-06	THACAE
Puma	2013-03-06	MICMAR
Puma	2013-03-06	THACAE
Puma	2013-03-06	PHIPYR
Puma	2013-03-06	CHIPAR
Puma	2013-03-06	MYRMEN
Puma	2013-03-06	THAARD
Puma	2013-03-06	MYRAXI
Puma	2013-03-06	THAARD
Puma	2013-03-06	RAMTUC
Puma	2013-03-06	CAPNIG
Puma	2013-03-06	XIPGUT
Puma	2013-03-06	COLPLU
Puma	2013-03-06	MYRLON
Puma	2013-03-06	XIPGUT
Puma	2013-03-06	MYRMYO
Puma	2013-03-06	CERCIN
Puma	2013-03-06	HENLEU
Puma	2013-03-06	HENLEU
Puma	2013-03-06	TROMEL
Puma	2013-03-06	POECAP
Puma	2013-03-06	CAMMEL
Puma	2013-03-06	PHAMAL
Puma	2013-03-06	THRCOR
Puma	2013-03-06	THRCOR
Puma	2013-03-06	THACAE
Puma	2013-03-06	GEOMON
Puma	2013-03-06	RAMTUC
Puma	2013-03-06	RAMTUC
Puma	2013-03-06	RAMTUC
Puma	2013-03-06	THAFUR
Puma	2013-03-06	TURALB
Puma	2013-03-06	PITGRO
Puma	2013-03-06	XIPGUT
Puma	2013-03-06	PHAMAL
Puma	2013-03-06	HYPCAN
Puma	2013-03-06	HYPCAN
Puma	2013-03-06	XIPGUT
Puma	2013-03-06	MICMAR
Puma	2013-03-06	CERCIN
Puma	2013-03-06	GLYSPI
Puma	2013-03-06	THAMUR
Puma	2013-03-06	CAPNIG
Puma	2013-03-06	THAMUR
Puma	2013-03-06	THRCOR
Puma	2013-03-06	THRCOR
Puma	2013-03-06	FORCOL
Puma	2013-03-06	MICMAR
Puma	2013-03-06	AMAAMA
Puma	2013-03-06	TINMAJ
Puma	2013-03-06	GLYSPI
Puma	2013-03-06	DICCIN
Puma	2013-03-06	MACREG
Puma	2013-03-06	RHYSIM
Puma	2013-03-06	CYMLIN
Puma	2013-03-06	BROCYA
Puma	2013-03-06	BROCYA
Puma	2013-03-06	BROCYA
Puma	2013-03-06	BROCYA
Puma	2013-03-06	BROCYA
Puma	2013-03-06	COLPLU
Puma	2013-03-06	QUEPUR
Puma	2013-03-06	QUEPUR
Puma	2013-03-06	CAMMEL
Puma	2013-03-06	UNKHUM
Puma	2013-03-06	CYACYA
Puma	2013-03-06	CAPNIG
Puma	2013-03-06	COLPLU
Puma	2013-03-06	MYRMYO
Puma	2013-03-06	PHAMAL
Puma	2013-03-06	PHAMAL
Puma	2013-03-06	PHAMAL
Puma	2013-03-06	PHAMAL
Puma	2013-03-06	PHAMAL
Puma	2013-03-06	LOPVIT
Puma	2013-03-06	CRYVAR
Puma	2013-03-06	CAMTUR
Puma	2013-03-06	CAMTUR
Puma	2013-03-06	ARAARA
Puma	2014-02-04	ABUCUM
Puma	2014-02-04	ABUCUM
Puma	2014-02-04	ABUCUM
Puma	2014-02-04	NYCGRI
Puma	2014-02-04	CYACYA
Puma	2014-02-04	MYRCAM
Puma	2014-02-04	BARMAR
Puma	2014-02-04	MYRFOR
Puma	2014-02-04	GLYSPI
Puma	2014-02-04	THAMUR
Puma	2014-02-04	HYLPOE
Puma	2014-02-04	TANSPP
Puma	2014-02-04	MYRMYO
Puma	2014-02-04	MYRBRA
Puma	2014-02-04	HYPHYP
Puma	2014-02-04	EUPLAN
Puma	2014-02-04	THAMUR
Puma	2014-02-04	MYRHAU
Puma	2014-02-04	TANCHI
Puma	2014-02-04	TANCHI
Puma	2014-02-04	TROMEL
Puma	2014-02-04	MITSAL
Puma	2014-02-04	THRCOR
Puma	2014-02-04	THRCOR
Puma	2014-02-04	MYIGRA
Puma	2014-02-04	MYIGRA
Puma	2014-02-04	DACCAY
Puma	2014-02-04	CERSER
Puma	2014-02-04	DACCAY
Puma	2014-02-04	BROCYA
Puma	2014-02-04	CYMLIN
Puma	2014-02-04	MYRMYO
Puma	2014-02-04	MYRBRA
Puma	2014-02-04	HYPCAN
Puma	2014-02-04	PITGRO
Puma	2014-02-04	TROVIR
Puma	2014-02-04	XIPGUT
Puma	2014-02-04	MYRHAU
Puma	2014-02-04	MYRMYO
Puma	2014-02-04	MYRHAU
Puma	2014-02-04	THACAE
Puma	2014-02-04	MYRERY
Puma	2014-02-04	GLYSPI
Puma	2014-02-04	MITSAL
Puma	2014-02-04	PSOCRE
Puma	2014-02-04	PSOCRE
Puma	2014-02-04	PSOCRE
Puma	2014-02-04	CORTOR
Puma	2014-02-04	XIPGUT
Puma	2014-02-04	GEOMON
Puma	2014-02-04	MYRBRA
Puma	2014-02-04	TROMEL
Puma	2014-02-04	TANNIG
Puma	2014-02-04	TANNIG
Puma	2014-02-04	HERDUG
Puma	2014-02-04	THACAE
Puma	2014-02-04	MYRMYO
Puma	2014-02-04	XIPSPI
Puma	2014-02-04	MYRERY
Puma	2014-02-04	MYRFJE
Puma	2014-02-04	HENLEU
Puma	2014-02-04	HENLEU
Puma	2014-02-04	MYRMEN
Puma	2014-02-04	MYRBRA
Puma	2014-02-04	PHAMAL
Puma	2014-02-04	MACREG
Puma	2014-02-04	ARAMAC
Puma	2014-02-04	TANSPP
Puma	2014-02-04	TANSPP
Puma	2014-02-04	HYLPOE
Puma	2014-02-04	CERCIN
Puma	2014-02-04	THACAE
Puma	2014-02-04	HYLNAE
Puma	2014-02-04	HYLSUB
Puma	2014-02-04	PIPPIP
Puma	2014-02-04	CAPNIG
Puma	2014-02-04	CAMRUB
Puma	2014-02-04	AUTINF
Puma	2014-02-04	HYLNAE
Puma	2014-02-04	TROVIR
Puma	2014-02-04	PIPPIP
Puma	2014-02-04	MYRHAU
Puma	2014-02-04	MELCRU
Puma	2014-02-04	MYRMYO
Puma	2014-02-04	THACAE
Puma	2014-02-04	MYRMYO
Puma	2014-02-04	COLPLU
Puma	2014-02-04	THACAE
Puma	2014-02-04	THACAE
Puma	2014-02-04	ATISPA
Puma	2014-02-04	AUTINF
Puma	2014-02-04	MYRHAU
Puma	2014-02-04	PHAMAL
Puma	2014-02-04	GEOMON
Puma	2014-02-04	RAMMEL
Puma	2014-02-04	MYRBRA
Puma	2014-02-04	MYRFOR
Puma	2014-02-04	GLYSPI
Puma	2014-02-04	THACAE
Puma	2014-02-04	MYRFJE
Puma	2014-02-04	PIACAY
Puma	2014-02-04	RAMMEL
Puma	2014-02-04	XIPGUT
Puma	2014-02-04	THASCH
Puma	2014-02-04	PHAMAL
Puma	2014-02-04	POECAP
Puma	2014-02-06	PSADEC
Puma	2014-02-06	PSADEC
Puma	2014-02-06	BARMAR
Puma	2014-02-06	XIPOBS
Puma	2014-02-06	ZIMGRA
Puma	2014-02-06	THAMUR
Puma	2014-02-06	UNKHUM
Puma	2014-02-06	GLYSPI
Puma	2014-02-06	THACAE
Puma	2014-02-06	PYGSTE
Puma	2014-02-06	MITSAL
Puma	2014-02-06	TINMAJ
Puma	2014-02-06	THAARD
Puma	2014-02-06	HYLPOE
Puma	2014-02-06	PSADEC
Puma	2014-02-06	LIOTHO
Puma	2014-02-06	GEOMON
Puma	2014-02-06	THAARD
Puma	2014-02-06	THACAE
Puma	2014-02-06	THACAE
Puma	2014-02-06	ARAMAC
Puma	2014-02-06	MYRMYO
Puma	2014-02-06	MYRBRA
Puma	2014-02-06	HYLHYP
Puma	2014-02-06	COLPLU
Puma	2014-02-06	MYITUB
Puma	2014-02-06	PHIERY
Puma	2014-02-06	MYRORN
Puma	2014-02-06	PHIERY
Puma	2014-02-06	THAARD
Puma	2014-02-06	MYRERY
Puma	2014-02-06	MYRERY
Puma	2014-02-06	THACAE
Puma	2014-02-06	MYRLON
Puma	2014-02-06	MYRLON
Puma	2014-02-06	MYRMYO
Puma	2014-02-06	MYRBRA
Puma	2014-02-06	THRCOR
Puma	2014-02-06	THRCOR
Puma	2014-02-06	TANSPP
Puma	2014-02-06	HYLHYP
Puma	2014-02-06	LIOTHO
Puma	2014-02-06	CAMMEL
Puma	2014-02-06	COLPLU
Puma	2014-02-06	TURALB
Puma	2014-02-06	TURALB
Puma	2014-02-06	HYLHYP
Puma	2014-02-06	MELCRU
Puma	2014-02-06	COLPLU
Puma	2014-02-06	THASCH
Puma	2014-02-06	CERCIN
Puma	2014-02-06	PICCHR
Puma	2014-02-06	CAPNIG
Puma	2014-02-06	CYMLIN
Puma	2014-02-06	PSADEC
Puma	2014-02-06	HENLEU
Puma	2014-02-06	HENLEU
Puma	2014-02-06	PHABOU
Puma	2014-02-06	PHAMAL
Puma	2014-02-06	PIPCOR
Puma	2014-02-06	PHABOU
Puma	2014-02-06	MYRERY
Puma	2014-02-06	TROVIR
Puma	2014-02-06	TOLPOL
Puma	2014-02-06	GEOMON
Puma	2014-02-06	TINMAJ
Puma	2014-02-06	CERCIN
Puma	2014-02-06	LIOTHO
Puma	2014-02-06	QUEPUR
Puma	2014-02-06	QUEPUR
Puma	2014-02-06	QUEPUR
Puma	2014-02-06	HYLPOE
Puma	2014-02-06	CAMRUB
Puma	2014-02-06	COLPLU
Puma	2014-02-06	HYPCAN
Puma	2014-02-06	CYMLIN
Puma	2014-02-06	PSADEC
Puma	2014-02-06	GEOMON
Puma	2014-02-06	TROVIR
Puma	2014-02-06	COLPLU
Puma	2014-02-06	MIOOLE
Puma	2014-02-06	RAMMEL
Puma	2014-02-06	PSADEC
Puma	2014-02-06	PHABOU
Puma	2014-02-06	PHABOU
Puma	2014-02-06	PHABOU
Puma	2014-02-06	PHABOU
Puma	2014-02-06	MYRLON
Puma	2014-02-06	CYMLIN
Puma	2014-02-06	RAMVIT
Puma	2014-02-06	MYRBRA
Puma	2014-02-06	RAMMEL
Puma	2014-02-06	MYRERY
Puma	2014-02-06	CAMMEL
Puma	2014-02-06	CAMMEL
Puma	2014-02-06	COLPLU
Puma	2014-02-06	CERCIN
Puma	2014-02-06	CERCIN
Puma	2014-02-06	CAMRUB
Puma	2014-02-06	TANCHI
Puma	2014-02-06	TANCHI
Puma	2014-02-06	GLYSPI
Puma	2014-02-06	RAMVIT
Puma	2014-02-06	HYLPOE
Puma	2014-02-06	TURALB
Puma	2014-02-06	PIACAY
Puma	2014-02-06	MYRBRA
Puma	2014-02-06	THACAE
Puma	2014-02-06	THACAE
Puma	2014-02-06	PIPERY
Puma	2014-02-06	COLPLU
Puma	2014-02-06	THASCH
Puma	2014-02-06	PSADEC
Puma	2014-02-06	CHIPAR
Puma	2014-02-06	PSADEC
Puma	2014-02-06	TANCHI
Puma	2014-02-06	TANCHI
Puma	2014-02-06	PHAMAL
Puma	2014-02-06	MYRBRA
Puma	2014-02-06	TINGUT
Puma	2014-02-07	MITSAL
Puma	2014-02-07	PENJAC
Puma	2014-02-07	ABUCUM
Puma	2014-02-07	PENJAC
Puma	2014-02-07	NYCGRI
Puma	2014-02-07	TURALB
Puma	2014-02-07	PENJAC
Puma	2014-02-07	PENJAC
Puma	2014-02-07	BUCCAP
Puma	2014-02-07	XIPGUT
Puma	2014-02-07	DENRUF
Puma	2014-02-07	LIOTHO
Puma	2014-02-07	ODOGUJ
Puma	2014-02-07	THACAE
Puma	2014-02-07	MYRLON
Puma	2014-02-07	XIPPRO
Puma	2014-02-07	HENLEU
Puma	2014-02-07	TANMEX
Puma	2014-02-07	TANMEX
Puma	2014-02-07	TANMEX
Puma	2014-02-07	XIPGUT
Puma	2014-02-07	PHAMAL
Puma	2014-02-07	MYRCAM
Puma	2014-02-07	BARMAR
Puma	2014-02-07	CRYCIN
Puma	2014-02-07	FORCOL
Puma	2014-02-07	CERSER
Puma	2014-02-07	MYRCAM
Puma	2014-02-07	MYICAN
Puma	2014-02-07	BARMAR
Puma	2014-02-07	TITCAY
Puma	2014-02-07	THACAE
Puma	2014-02-07	MYRERY
Puma	2014-02-07	PHAMAL
Puma	2014-02-07	MYRLON
Puma	2014-02-07	DENFUL
Puma	2014-02-07	MYRMEN
Puma	2014-02-07	CACCEL
Puma	2014-02-07	MYRLON
Puma	2014-02-07	TANCHI
Puma	2014-02-07	TANCHI
Puma	2014-02-07	CAPNIG
Puma	2014-02-07	COLPLU
Puma	2014-02-07	ODOGUJ
Puma	2014-02-07	LEUSCH
Puma	2014-02-07	THAFUR
Puma	2014-02-07	ZIMGRA
Puma	2014-02-07	TERERY
Puma	2014-02-07	PHIERY
Puma	2014-02-07	THACAE
Puma	2014-02-07	CACCEL
Puma	2014-02-07	GLYSPI
Puma	2014-02-07	GLYSPI
Puma	2014-02-07	PHIERY
Puma	2014-02-07	CELELE
Puma	2014-02-07	TROVIR
Puma	2014-02-07	CERCIN
Puma	2014-02-07	CHIPAR
Puma	2014-02-07	MYRBRA
Puma	2014-02-07	PHIPYR
Puma	2014-02-07	CHIPAR
Puma	2014-02-07	MYRBRA
Puma	2014-02-07	CRYCIN
Puma	2014-02-07	CRYCIN
Puma	2014-02-07	CHIPAR
Puma	2014-02-07	HYLPOE
Puma	2014-02-07	CAPNIG
Puma	2014-02-07	RAMVIT
Puma	2014-02-07	XIPPRO
Puma	2014-02-07	GLYSPI
Puma	2014-02-07	GLYSPI
Puma	2014-02-07	XIPGUT
Puma	2014-02-07	THASCH
Puma	2014-02-07	PIOMEN
Puma	2014-02-07	QUEPUR
Puma	2014-02-07	QUEPUR
Puma	2014-02-07	FORANA
Puma	2014-02-07	THACAE
Puma	2014-02-07	THAARD
Puma	2014-02-07	MYRERY
Puma	2014-02-07	MYRFJE
Puma	2014-02-07	TINMAJ
Puma	2014-02-07	MYRFJE
Puma	2014-02-07	PHAMAL
Puma	2014-02-07	CAPNIG
Puma	2014-02-07	CNISUB
Puma	2014-02-07	TOLASS
Puma	2014-02-07	THAMUR
Puma	2014-02-07	XIPGUT
Puma	2014-02-07	PLACOR
Puma	2014-02-07	THASCH
Puma	2014-02-07	TINMAJ
Puma	2014-02-07	PLACOR
Puma	2014-02-07	MYRBRA
Puma	2014-02-07	MITSAL
Puma	2014-02-07	CYACYA
Puma	2014-02-07	AUTINF
Puma	2014-02-07	THAMUR
Puma	2014-02-07	PHAMAL
Puma	2014-02-07	GEOMON
Puma	2014-02-07	COLPLU
Puma	2014-02-07	TOLPOL
Puma	2014-02-07	EUBRIC
Puma	2014-02-07	MYRBRA
Puma	2014-02-07	GLYSPI
Puma	2014-02-07	THAMUR
Puma	2014-02-07	MELCRU
Puma	2014-02-07	TOLPOL
Puma	2014-02-07	MYRBRA
Puma	2014-02-07	BARMAR
Puma	2014-02-07	MYIGRA
Puma	2014-02-07	CAPNIG
Puma	2014-02-07	MYRCAM
Puma	2014-02-07	TITCAY
Puma	2014-02-07	HYLPOE
Puma	2014-02-07	TURALB
Puma	2014-02-07	CELGRA
Puma	2014-02-07	COLPLU
Puma	2014-02-07	GLYSPI
Puma	2014-02-07	HYLPOE
Puma	2014-02-07	COLPLU
Puma	2014-02-07	XIPPIC
Puma	2014-02-07	LIOTHO
Puma	2014-02-07	CELGRA
Puma	2014-02-07	MIOOLE
Puma	2014-02-07	CELGRA
Puma	2014-02-07	HERDUG
Puma	2014-02-07	CACCEL
Puma	2014-02-07	THACAE
Puma	2014-02-07	THACAE
Puma	2014-02-07	GLYSPI
Puma	2014-02-07	HABRUB
Puma	2014-02-07	HABRUB
Puma	2014-02-07	MYRERY
Puma	2014-02-07	MYRERY
Puma	2014-02-07	XIPOCE
Puma	2014-02-07	THAFUR
Puma	2014-02-07	PYGSTE
Puma	2014-02-07	PIOMEN
Puma	2014-02-07	EUPLAN
Puma	2014-02-07	CORTOR
Puma	2014-02-07	HERDUG
Puma	2014-02-07	COLPLU
Puma	2014-02-07	NONBRU
Puma	2014-02-07	PYGSTE
Puma	2014-02-07	CYMLIN
Puma	2014-02-07	EUBRIC
Puma	2014-02-07	RAMMEL
Puma	2014-02-07	CELGRA
Puma	2014-02-07	CORTOR
Puma	2014-02-07	MYRLON
Puma	2014-02-07	EUBRIC
Puma	2014-02-07	MYRBRA
Puma	2014-02-07	THASCH
Puma	2014-02-07	RAMMEL
Puma	2014-02-07	MYRERY
Puma	2014-02-07	THACAE
Puma	2014-02-07	MYRLON
Puma	2014-02-07	PIPCOR
Puma	2014-02-12	MYRCAM
Puma	2014-02-12	BUCCAP
Puma	2014-02-12	NONBRU
Puma	2014-02-12	CERSER
Puma	2014-02-12	OTUWAT
Puma	2014-02-12	CHIPAR
Puma	2014-02-12	HYPCAN
Puma	2014-02-12	MYRBRA
Puma	2014-02-12	MYRMYO
Puma	2014-02-12	THRCOR
Puma	2014-02-12	THRCOR
Puma	2014-02-12	CYMLIN
Puma	2014-02-12	XIPGUT
Puma	2014-02-12	AMAFAR
Puma	2014-02-12	TOLASS
Puma	2014-02-12	CERCIN
Puma	2014-02-12	CAMMEL
Puma	2014-02-12	PHIPYR
Puma	2014-02-12	MYRFJE
Puma	2014-02-12	PHAMAL
Puma	2014-02-12	MYRFJE
Puma	2014-02-12	PTEPLU
Puma	2014-02-12	PTEPLU
Puma	2014-02-12	CORTOR
Puma	2014-02-12	TROVIR
Puma	2014-02-12	SCLCAU
Puma	2014-02-12	ANCSTR
Puma	2014-02-12	PIPERY
Puma	2014-02-12	SCLCAU
Puma	2014-02-12	HYLOCH
Puma	2014-02-12	TRORUF
Puma	2014-02-12	THAARD
Puma	2014-02-12	PLACOR
Puma	2014-02-12	PHAMAL
Puma	2014-02-12	HYLOCH
Puma	2014-02-12	MYRLON
Puma	2014-02-12	MYRLON
Puma	2014-02-12	CORTOR
Puma	2014-02-12	RAMVIT
Puma	2014-02-12	TROVIR
Puma	2014-02-12	BARMAR
Puma	2014-02-12	MACREG
Puma	2014-02-12	PIPCOR
Puma	2014-02-12	CAPNIG
Puma	2014-02-12	HYLOCH
Puma	2014-02-12	MYRFJE
Puma	2014-02-12	HYLOCH
Puma	2014-02-12	MYRLON
Puma	2014-02-12	MYRFJE
Puma	2014-02-12	THACAE
Puma	2014-02-12	TINMAJ
Puma	2014-02-12	GEOMON
Puma	2014-02-12	PSAVIR
Puma	2014-02-12	CERCIN
Puma	2014-02-12	GEOMON
Puma	2014-02-12	GLYSPI
Puma	2014-02-12	GEOMON
Puma	2014-02-12	MYRBRA
Puma	2014-02-12	THACAE
Puma	2014-02-12	MYRFJE
Puma	2014-02-12	THAARD
Puma	2014-02-12	MYRLON
Puma	2014-02-12	THAARD
Puma	2014-02-12	HYLOCH
Puma	2014-02-12	ANCSTR
Puma	2014-02-12	MICQUI
Puma	2014-02-12	MICQUI
Puma	2014-02-12	GLYSPI
Puma	2014-02-12	PHIERT
Puma	2014-02-12	CAPNIG
Puma	2014-02-12	CERCIN
Puma	2014-02-12	MYRHAU
Puma	2014-02-12	MYRHAU
Puma	2014-02-12	THACAE
Puma	2014-02-12	DENRUF
Puma	2014-02-12	RHYSIM
Puma	2014-02-12	PIPCOR
Puma	2014-02-12	GLYSPI
Puma	2014-02-12	XIPGUT
Puma	2014-02-12	CACCEL
Puma	2014-02-12	XIPSPI
Puma	2014-02-12	PIPPIP
Puma	2014-02-12	PIPPIP
Puma	2014-02-12	CERCIN
Puma	2014-02-12	MYRCAM
Puma	2014-02-12	PHAMAL
Puma	2014-02-12	PHAMAL
Puma	2014-02-12	TERERY
Puma	2014-02-12	MYRBRA
Puma	2014-02-12	THACAE
Puma	2014-02-12	QUEPUR
Puma	2014-02-12	QUEPUR
Puma	2014-02-12	DAPAME
Puma	2014-02-12	DAPAME
Puma	2014-02-12	MELCRU
Puma	2014-02-12	CYMLIN
Puma	2014-02-12	PHAMAL
Puma	2014-02-12	PHAMAL
Puma	2014-02-12	PHAMAL
Puma	2014-02-12	PHAMAL
Puma	2014-02-12	CERCIN
Puma	2014-02-12	LEGLEU
Puma	2014-02-12	MYILUT
Puma	2014-02-12	MYILUT
Puma	2014-02-12	MYIGRA
Puma	2014-02-12	MYIGRA
Puma	2014-02-12	CAPNIG
Puma	2014-02-12	MYRAXI
Puma	2014-02-12	MICQUI
Puma	2014-02-12	MYRBRA
Puma	2014-02-12	GLYSPI
Puma	2014-02-12	THACAE
Puma	2014-02-12	COLPLU
Puma	2014-02-12	MYRBRA
Puma	2014-02-12	XIPGUT
Puma	2014-02-12	FORCOL
Puma	2014-02-12	MYRAXI
Puma	2014-02-12	PIACAY
Puma	2014-02-12	RAMTUC
Puma	2014-02-12	RAMTUC
Puma	2014-02-12	CAMMEL
Puma	2014-02-12	TRORUF
Puma	2014-02-12	PIPCOR
Puma	2014-02-12	CAMMEL
Puma	2014-02-12	THRCOR
Puma	2014-02-12	CERCIN
Puma	2014-02-12	COLPLU
Puma	2014-02-12	AMAFAR
Puma	2014-02-12	THRCOR
Puma	2014-02-12	THRCOR
Puma	2014-02-14	OTUWAT
Puma	2014-02-14	NYCAET
Puma	2014-02-14	MITSAL
Puma	2014-02-14	CICHUH
Puma	2014-02-14	BUCCAP
Puma	2014-02-14	XIPGUT
Puma	2014-02-14	AUTINF
Puma	2014-02-14	PYGSTE
Puma	2014-02-14	GLYSPI
Puma	2014-02-14	AUTINF
Puma	2014-02-14	XIPGUT
Puma	2014-02-14	THASCH
Puma	2014-02-14	HABRUB
Puma	2014-02-14	CAPNIG
Puma	2014-02-14	THACAE
Puma	2014-02-14	ATISPA
Puma	2014-02-14	THACAE
Puma	2014-02-14	THAARD
Puma	2014-02-14	XIPGUT
Puma	2014-02-14	ODOGUJ
Puma	2014-02-14	ODOGUJ
Puma	2014-02-14	GRADIG
Puma	2014-02-14	HYLPOE
Puma	2014-02-14	HYLNAE
Puma	2014-02-14	SCHLEU
Puma	2014-02-14	PSAVIR
Puma	2014-02-14	MYRMYO
Puma	2014-02-14	HYLNAE
Puma	2014-02-14	CRYCIN
Puma	2014-02-14	MYRMYO
Puma	2014-02-14	MYRMYO
Puma	2014-02-14	HYLSUB
Puma	2014-02-14	COLPLU
Puma	2014-02-14	CAPNIG
Puma	2014-02-14	BARMAR
Puma	2014-02-14	FORCOL
Puma	2014-02-14	MYRCAM
Puma	2014-02-14	MYRBRA
Puma	2014-02-14	MYRCAM
Puma	2014-02-14	MICQUI
Puma	2014-02-14	MACREG
Puma	2014-02-14	THAFUR
Puma	2014-02-14	POECAP
Puma	2014-02-14	MYRBRA
Puma	2014-02-14	MYRBRA
Puma	2014-02-14	XIPGUT
Puma	2014-02-14	TOLASS
Puma	2014-02-14	MITSAL
Puma	2014-02-14	PSADEC
Puma	2014-02-14	LIOTHO
Puma	2014-02-14	CAPNIG
Puma	2014-02-14	BARMAR
Puma	2014-02-14	MYITUB
Puma	2014-02-14	TIGLIN
Puma	2014-02-14	EUBRIC
Puma	2014-02-14	MYRHAU
Puma	2014-02-14	MYRHAU
Puma	2014-02-14	THRCOR
Puma	2014-02-14	PIPCOR
Puma	2014-02-14	RAMTUC
Puma	2014-02-14	RAMTUC
Puma	2014-02-14	PHAMAL
Puma	2014-02-14	PIPFIL
Puma	2014-02-14	POECAP
Puma	2014-02-14	THRCOR
Puma	2014-02-14	THRCOR
Puma	2014-02-14	COLPLU
Puma	2014-02-14	HYLPOE
Puma	2014-02-14	BARMAR
Puma	2014-02-14	CELGRA
Puma	2014-02-14	PHAMAL
Puma	2014-02-14	RAMTUC
Puma	2014-02-14	CERSER
Puma	2014-02-14	QUEPUR
Puma	2014-02-14	QUEPUR
Puma	2014-02-14	TURALB
Puma	2014-02-14	XIPGUT
Puma	2014-02-14	AUTINF
Puma	2014-02-14	HYLPOE
Puma	2014-02-14	GRADIG
Puma	2014-02-14	ATISPA
Puma	2014-02-14	MYRMYO
Puma	2014-02-14	CERSER
Puma	2014-02-14	RAMVIT
Puma	2014-02-14	RAMVIT
Puma	2014-02-14	XIPGUT
Puma	2014-02-14	ARAARA
Puma	2014-02-14	PTEPLU
Puma	2014-02-14	PTEPLU
Puma	2014-02-14	RAMTUC
Puma	2014-02-14	RAMTUC
Puma	2014-02-14	CAPNIG
Puma	2014-02-14	MYRHAU
Puma	2014-02-14	RAMTUC
Puma	2014-02-14	MYRMYO
Puma	2014-02-14	MYRLON
Puma	2014-02-14	THACAE
Puma	2014-02-14	THACAE
Puma	2014-02-14	MYRLON
Puma	2014-02-14	RAMTUC
Puma	2014-02-14	RAMVIT
Puma	2014-02-14	THASCH
Puma	2014-02-14	MELCRU
Puma	2014-02-14	EUBRIC
Puma	2014-02-14	MELCRU
Puma	2014-02-14	CYMLIN
Puma	2014-02-14	CAMMEL
Puma	2014-02-14	TURALB
Puma	2014-02-14	MICGIL
Puma	2014-02-14	QUEPUR
Puma	2014-02-14	QUEPUR
Puma	2014-02-14	XIPGUT
Puma	2014-02-14	AUTINF
Puma	2014-02-14	QUEPUR
Puma	2014-02-14	QUEPUR
Puma	2014-02-14	MYRFOR
Puma	2014-02-14	HYLHYP
Puma	2014-02-14	HYLHYP
Puma	2014-02-14	THAARD
Puma	2014-02-14	THAARD
Puma	2014-02-14	MYRLON
Puma	2014-02-14	MYRLON
Puma	2014-02-14	MYRERY
Puma	2014-02-14	AUTINF
Puma	2014-02-14	XIPSPI
Puma	2014-02-14	TROVIR
Puma	2014-02-14	EUBRIC
Puma	2014-02-14	THACAE
Puma	2014-02-14	MICGIL
Puma	2014-02-14	MYRMEN
Puma	2014-02-14	THACAE
Puma	2014-02-14	THACAE
Puma	2014-02-14	MYRAXI
Puma	2014-02-14	SCHLEU
Puma	2014-02-14	AUTINF
Puma	2014-02-14	GLYSPI
Puma	2014-02-14	RAMMEL
Puma	2014-02-14	HYLHYP
Puma	2014-02-14	MYRAXI
Puma	2014-02-14	MYRHAU
Puma	2014-02-14	XIPGUT
Puma	2014-02-14	PENJAC
Puma	2014-02-14	PTEPLU
Puma	2014-02-14	PTEPLU
Puma	2014-02-14	COLPLU
Puma	2014-02-14	PIPCOR
Puma	2014-02-14	ICTPLU
Puma	2014-02-14	HYLHYP
Puma	2014-02-14	HYLHYP
Puma	2014-02-14	GEOMON
Puma	2014-02-14	CRYCIN
Puma	2014-02-14	CHIPAR
Puma	2014-02-14	PITGRO
Puma	2014-02-14	AUTINF
Puma	2014-02-14	CHIPAR
Puma	2014-02-14	CHIPAR
Puma	2014-02-14	TRORUF
Puma	2014-02-14	MYRMYO
Puma	2014-02-14	PSAYUR
Puma	2014-02-14	CAPNIG
Puma	2014-02-14	XIPGUT
Puma	2014-02-14	COLPLU
Puma	2014-02-14	RAMTUC
Puma	2014-02-16	TYRSTO
Puma	2014-02-16	GLYSPI
Puma	2014-02-16	FORANA
Puma	2014-02-16	THACAE
Puma	2014-02-16	HYLPOE
Puma	2014-02-16	XIPPRO
Puma	2014-02-16	THACAE
Puma	2014-02-16	XIPGUT
Puma	2014-02-16	MYRAXI
Puma	2014-02-16	UNKHUM
Puma	2014-02-16	TANSPP
Puma	2014-02-16	TURLAW
Puma	2014-02-16	COLPLU
Puma	2014-02-16	ODOGUJ
Puma	2014-02-16	CAMMEL
Puma	2014-02-16	PIPCOR
Puma	2014-02-16	XIPGUT
Puma	2014-02-16	TURALB
Puma	2014-02-16	COLPLU
Puma	2014-02-16	ATISPA
Puma	2014-02-16	EUBRIC
Puma	2014-02-16	TROMEL
Puma	2014-02-16	CYMLIN
Puma	2014-02-16	MYRMYO
Puma	2014-02-16	SCLCAU
Puma	2014-02-16	CAPNIG
Puma	2014-02-16	THASCH
Puma	2014-02-16	XIPGUT
Puma	2014-02-16	MYRMYO
Puma	2014-02-16	CERSER
Puma	2014-02-16	QUEPUR
Puma	2014-02-16	QUEPUR
Puma	2014-02-16	GLYSPI
Puma	2014-02-16	GLYSPI
Puma	2014-02-16	HENLEU
Puma	2014-02-16	XIPGUT
Puma	2014-02-16	TANCHI
Puma	2014-02-16	TANCHI
Puma	2014-02-16	XIPGUT
Puma	2014-02-16	BARMAR
Puma	2014-02-16	RAMVIT
Puma	2014-02-16	RAMVIT
Puma	2014-02-16	BARMAR
Puma	2014-02-16	COLPLU
Puma	2014-02-16	THASCH
Puma	2014-02-16	MYRFOR
Puma	2014-02-16	TROVIR
Puma	2014-02-16	TINMAJ
Puma	2014-02-16	TROMEL
Puma	2014-02-16	XIPGUT
Puma	2014-02-16	ARAMAC
Puma	2014-02-16	BARMAR
Puma	2014-02-16	PHAMAL
Puma	2014-02-16	GEOMON
Puma	2014-02-16	PLACOR
Puma	2014-02-16	MYRFJE
Puma	2014-02-16	TINMAJ
Puma	2014-02-16	BARMAR
Puma	2014-02-16	HYLPOE
Puma	2014-02-16	TANCHI
Puma	2014-02-16	TANCHI
Puma	2014-02-16	PSAVIR
Puma	2014-02-16	GEOMON
Puma	2014-02-16	TURALB
Puma	2014-02-16	TINMAJ
Puma	2014-02-16	PITGRO
Puma	2014-02-16	CAPNIG
Puma	2014-02-16	BARMAR
Puma	2014-02-16	TOLASS
Puma	2014-02-16	MYRBRA
Puma	2014-02-16	COLPLU
Puma	2014-02-16	THAMUR
Puma	2014-02-16	FORANA
Puma	2014-02-16	BARMAR
Puma	2014-02-16	PTEPLU
Puma	2014-02-16	PLACOR
Puma	2014-02-16	RAMTUC
Puma	2014-02-16	GLYSPI
Puma	2014-02-16	MYRCAM
Puma	2014-02-16	MYRBRA
Puma	2014-02-16	PTEPLU
Puma	2014-02-16	PTEPLU
Puma	2014-02-16	CAPNIG
Puma	2014-02-16	MONMOR
Puma	2014-02-16	MONMOR
Puma	2014-02-16	MONMOR
Puma	2014-02-16	CYMLIN
Puma	2014-02-16	THAFUR
Puma	2014-02-16	HYLHYP
Puma	2014-02-16	HYLHYP
Puma	2014-02-16	MYRBRA
Puma	2014-02-16	CHIPAR
Puma	2014-02-16	CAPNIG
Puma	2014-02-16	HEMZOS
Puma	2014-02-16	RHYSIM
Puma	2014-02-18	LOPCRI
Puma	2014-02-18	MITSAL
Puma	2014-02-18	AUTINF
Puma	2014-02-18	MICGIL
Puma	2014-02-18	XIPGUT
Puma	2014-02-18	HABRUB
Puma	2014-02-18	HABRUB
Puma	2014-02-18	PLACOR
Puma	2014-02-18	PIPFIL
Puma	2014-02-18	MACREG
Puma	2014-02-18	MYIECA
Puma	2014-02-18	FORANA
Puma	2014-02-18	TROMEL
Puma	2014-02-18	FORCOL
Puma	2014-02-18	GLYSPI
Puma	2014-02-18	SELREI
Puma	2014-02-18	MYRBRA
Puma	2014-02-18	TANCHI
Puma	2014-02-18	TANCHI
Puma	2014-02-18	TANCHI
Puma	2014-02-18	BARMAR
Puma	2014-02-18	CAPNIG
Puma	2014-02-18	COLPLU
Puma	2014-02-18	RAMTUC
Puma	2014-02-18	TURLAW
Puma	2014-02-18	PSAVIR
Puma	2014-02-18	PIPCOR
Puma	2014-02-18	CERCIN
Puma	2014-02-18	PHAMAL
Puma	2014-02-18	BARMAR
Puma	2014-02-18	TINMAJ
Puma	2014-02-18	RHYSIM
Puma	2014-02-18	UNKHUM
Puma	2014-02-18	BARMAR
Puma	2014-02-18	ARAMAC
Puma	2014-02-18	ARAMAC
Puma	2014-02-18	TROMEL
Puma	2014-02-18	ELEPLA
Puma	2014-02-18	ELEPLA
Puma	2014-02-18	CERCIN
Puma	2014-02-18	MYRAXI
Puma	2014-02-18	THACAE
Puma	2014-02-18	PIPCHL
Puma	2014-02-18	HYLNAE
Puma	2014-02-18	HYLNAE
Puma	2014-02-18	PLACOR
Puma	2014-02-18	PLACOR
Puma	2014-02-18	HYLNAE
Puma	2014-02-18	EUBRIC
Puma	2014-02-18	PSAVIR
Puma	2014-02-18	MITSAL
Puma	2014-02-18	BARMAR
Puma	2014-02-18	MYRFOR
Puma	2014-02-18	MYRFJE
Puma	2014-02-18	TANCHI
Puma	2014-02-18	TANCHI
Puma	2014-02-18	THACAE
Puma	2014-02-18	EUBRIC
Puma	2014-02-18	PHAMAL
Puma	2014-02-18	MYIGRA
Puma	2014-02-18	MYIGRA
Puma	2014-02-18	TITCAY
Puma	2014-02-18	CORTOR
Puma	2014-02-18	THAMUR
Puma	2014-02-18	HYLNAE
Puma	2014-02-18	HYLNAE
Puma	2014-02-18	GLYSPI
Puma	2014-02-18	LEGLEU
Puma	2014-02-18	RAMTUC
Puma	2014-02-18	RAMTUC
Puma	2014-02-18	TANSPP
Puma	2014-02-18	LEGLEU
Puma	2014-02-18	TURALB
Puma	2014-02-18	XIPGUT
Puma	2014-02-18	GLYSPI
Puma	2014-02-18	MITSAL
Puma	2014-02-18	TANSPP
Puma	2014-02-18	DACCAY
Puma	2014-02-18	DACCAY
Puma	2014-02-18	EUBRIC
Puma	2014-02-18	LEGLEU
Puma	2014-02-18	TACSUR
Puma	2014-02-18	TACSUR
Puma	2014-02-18	TACSUR
Puma	2014-02-18	PICCHR
Puma	2014-02-18	PIPCOR
Puma	2014-02-18	XIPGUT
Puma	2014-02-18	PIPCOR
Puma	2014-02-18	THASCH
Puma	2014-02-18	MYRAXI
Puma	2014-02-18	CHIPAR
Puma	2014-02-18	HERDUG
Puma	2014-02-18	MYRLON
Puma	2014-02-18	UNKHUM
Puma	2014-02-18	ANCSTR
Puma	2014-02-18	GLYSPI
Puma	2014-02-18	SCHLEU
Puma	2014-02-18	TANSPP
Puma	2014-02-18	TANSPP
Puma	2014-02-18	CAMMEL
Puma	2014-02-18	GEOMON
Puma	2014-02-18	MYRMYO
Puma	2014-02-18	AUTINF
Puma	2014-02-18	GEOMON
Puma	2014-02-18	GLYSPI
Puma	2014-02-18	AUTINF
Puma	2015-02-07	DAPAME
Puma	2015-02-07	DAPAME
Puma	2015-02-07	BARMAR
Puma	2015-02-07	LOPCRI
Puma	2015-02-07	BARMAR
Puma	2015-02-07	XIPGUT
Puma	2015-02-07	GLYSPI
Puma	2015-02-07	PIPCHL
Puma	2015-02-07	GLYSPI
Puma	2015-02-07	THAMUR
Puma	2015-02-07	THAMUR
Puma	2015-02-07	CYMLIN
Puma	2015-02-07	LIOTHO
Puma	2015-02-07	CAMMEL
Puma	2015-02-07	PHAMAL
Puma	2015-02-07	CAMMEL
Puma	2015-02-07	COLPLU
Puma	2015-02-07	MYRERY
Puma	2015-02-07	MYRERY
Puma	2015-02-07	RAMMEL
Puma	2015-02-07	MYRBRA
Puma	2015-02-07	THAARD
Puma	2015-02-07	THAARD
Puma	2015-02-07	PIPPIP
Puma	2015-02-07	PIACAY
Puma	2015-02-07	COLPLU
Puma	2015-02-07	CELGRA
Puma	2015-02-07	TOLASS
Puma	2015-02-07	HYLNAE
Puma	2015-02-07	HYLNAE
Puma	2015-02-07	HYPCAN
Puma	2015-02-07	MYRBRA
Puma	2015-02-07	TURLAW
Puma	2015-02-07	COLPLU
Puma	2015-02-07	MYRHAU
Puma	2015-02-07	PHAATR
Puma	2015-02-07	RAMTUC
Puma	2015-02-07	THRCOR
Puma	2015-02-07	THRCOR
Puma	2015-02-07	GRADIG
Puma	2015-02-07	PHAMAL
Puma	2015-02-07	MYRMYO
Puma	2015-02-07	CELGRA
Puma	2015-02-07	MYRBRA
Puma	2015-02-07	MYRMYO
Puma	2015-02-07	CORTOR
Puma	2015-02-07	PIPCHL
Puma	2015-02-07	DAPAME
Puma	2015-02-07	CAPNIG
Puma	2015-02-07	CHIPAR
Puma	2015-02-07	GRADIG
Puma	2015-02-07	XIPOBS
Puma	2015-02-07	DAPAME
Puma	2015-02-07	DAPAME
Puma	2015-02-07	PTEAZA
Puma	2015-02-07	PTEAZA
Puma	2015-02-07	PTEAZA
Puma	2015-02-07	PITGRO
Puma	2015-02-07	TURLAW
Puma	2015-02-07	CORTOR
Puma	2015-02-07	HYLPOE
Puma	2015-02-07	PSAVIR
Puma	2015-02-07	GALALB
Puma	2015-02-07	MYRMYO
Puma	2015-02-07	MYITUB
Puma	2015-02-07	SELREI
Puma	2015-02-07	ANCSTR
Puma	2015-02-07	PYGSTE
Puma	2015-02-07	PIOMEN
Puma	2015-02-07	MYRLON
Puma	2015-02-07	MYRLON
Puma	2015-02-07	BARMAR
Puma	2015-02-07	PSAVIR
Puma	2015-02-07	TROVIR
Puma	2015-02-07	PIPPIP
Puma	2015-02-07	PHAMAL
Puma	2015-02-07	PIPPIP
Puma	2015-02-07	AUTINF
Puma	2015-02-07	MYRLON
Puma	2015-02-07	MYRLON
Puma	2015-02-07	THACAE
Puma	2015-02-07	THACAE
Puma	2015-02-07	MONMOR
Puma	2015-02-07	MONMOR
Puma	2015-02-07	MONMOR
Puma	2015-02-07	MYRBRA
Puma	2015-02-07	HABRUB
Puma	2015-02-07	RAMVIT
Puma	2015-02-07	MYRBRA
Puma	2015-02-07	LOPVIT
Puma	2015-02-07	HENLEU
Puma	2015-02-07	BROCYA
Puma	2015-02-07	PIPPIP
Puma	2015-02-07	BARMAR
Puma	2015-02-07	PYGSTE
Puma	2015-02-07	CAPNIG
Puma	2015-02-07	PSAVIR
Puma	2015-02-07	PSAVIR
Puma	2015-02-07	PSAVIR
Puma	2015-02-07	JACAUR
Puma	2015-02-07	CORTOR
Puma	2015-02-07	COLPLU
Puma	2015-02-07	THRCOR
Puma	2015-02-07	THRCOR
Puma	2015-02-07	AUTOCH
Puma	2015-02-07	OTUWAT
Puma	2015-02-07	SCLRUF
Puma	2015-02-07	CERCIN
Puma	2015-02-07	LIOTHO
Puma	2015-02-07	CERCIN
Puma	2015-02-07	HYLSUB
Puma	2015-02-07	XIPGUT
Puma	2015-02-07	MYRFJE
Puma	2015-02-07	MYRFJE
Puma	2015-02-07	CAMMEL
Puma	2015-02-07	CAPNIG
Puma	2015-02-07	THACAE
Puma	2015-02-07	THACAE
Puma	2015-02-07	TROVIR
Puma	2015-02-07	SELREI
Puma	2015-02-07	ELEPLA
Puma	2015-02-07	COLPLU
Puma	2015-02-07	TROVIR
Puma	2015-02-07	TURLAW
Puma	2015-02-07	THASCH
Puma	2015-02-07	CELGRA
Puma	2015-02-07	GLYSPI
Puma	2015-02-07	DENCER
Puma	2015-02-07	THRNIG
Puma	2015-02-07	XIPGUT
Puma	2015-02-07	PIPCOR
Puma	2015-02-07	MACREG
Puma	2015-02-07	COLPLU
Puma	2015-02-07	MYIGRA
Puma	2015-02-07	PITGRO
Puma	2015-02-07	PIPCOR
Puma	2015-02-07	COLPLU
Puma	2015-02-07	COLPLU
Puma	2015-02-07	THAFUR
Puma	2015-02-07	GLYSPI
Puma	2015-02-07	PSOCRE
Puma	2015-02-07	PSOCRE
Puma	2015-02-07	MALFUS
Puma	2015-02-07	PIPCOR
Puma	2015-02-07	MYRMYO
Puma	2015-02-07	COLPLU
Puma	2015-02-07	CAMMEL
Puma	2015-02-07	GALALB
Puma	2015-02-07	ARAARA
Puma	2015-02-07	XIPGUT
Puma	2015-02-07	GLYSPI
Puma	2015-02-07	CORTOR
Puma	2015-02-07	CAPNIG
Puma	2015-02-07	MYRMYO
Puma	2015-02-07	PIPCOR
Puma	2015-02-07	XIPGUT
Puma	2015-02-10	HYLSUB
Puma	2015-02-10	XIPGUT
Puma	2015-02-10	GLABRA
Puma	2015-02-10	SCLMEX
Puma	2015-02-10	XIPGUT
Puma	2015-02-10	XIPGUT
Puma	2015-02-10	ATISPA
Puma	2015-02-10	HABRUB
Puma	2015-02-10	PHIPYR
Puma	2015-02-10	CELGRA
Puma	2015-02-10	LEGLEU
Puma	2015-02-10	THAFUR
Puma	2015-02-10	MYRFJE
Puma	2015-02-10	MYRERY
Puma	2015-02-10	MYRAXI
Puma	2015-02-10	PHABOU
Puma	2015-02-10	AUTINF
Puma	2015-02-10	HABRUB
Puma	2015-02-10	HABRUB
Puma	2015-02-10	MYRLON
Puma	2015-02-10	THACAE
Puma	2015-02-10	PHIERY
Puma	2015-02-10	PHIERY
Puma	2015-02-10	CAPNIG
Puma	2015-02-10	HABRUB
Puma	2015-02-10	HYLOCH
Puma	2015-02-10	MYRLON
Puma	2015-02-10	GLYSPI
Puma	2015-02-10	GEOMON
Puma	2015-02-10	MYRBRA
Puma	2015-02-10	MYRBRA
Puma	2015-02-10	RAMMEL
Puma	2015-02-10	PHAMAL
Puma	2015-02-10	TOLASS
Puma	2015-02-10	CHIPAR
Puma	2015-02-10	THACAE
Puma	2015-02-10	HENLEU
Puma	2015-02-10	XIPGUT
Puma	2015-02-10	GLYSPI
Puma	2015-02-10	MYRMYO
Puma	2015-02-10	MYRMYO
Puma	2015-02-10	THACAE
Puma	2015-02-10	MYRLON
Puma	2015-02-10	THACAE
Puma	2015-02-10	PHABOU
Puma	2015-02-10	MYRMYO
Puma	2015-02-10	GLYSPI
Puma	2015-02-10	MYITUB
Puma	2015-02-10	PSOCRE
Puma	2015-02-10	PIPCOR
Puma	2015-02-10	GLYSPI
Puma	2015-02-10	GLYSPI
Puma	2015-02-10	RAMVIT
Puma	2015-02-10	CAPNIG
Puma	2015-02-10	TROVIR
Puma	2015-02-10	HERDUG
Puma	2015-02-10	PENJAC
Puma	2015-02-10	PHABOU
Puma	2015-02-10	PHABOU
Puma	2015-02-10	MIOOLE
Puma	2015-02-10	GEOMON
Puma	2015-02-10	PIOMEN
Puma	2015-02-10	GLYSPI
Puma	2015-02-10	CAPNIG
Puma	2015-02-10	CERCIN
Puma	2015-02-10	CELFLA
Puma	2015-02-10	XIPGUT
Puma	2015-02-10	PHABOU
Puma	2015-02-10	PHABOU
Puma	2015-02-10	CELFLA
Puma	2015-02-10	PSAVIR
Puma	2015-02-10	COLPLU
Puma	2015-02-10	THAMUR
Puma	2015-02-10	PSAVIR
Puma	2015-02-10	PSAVIR
Puma	2015-02-10	GLYSPI
Puma	2015-02-10	AUTINF
Puma	2015-02-10	COLPLU
Puma	2015-02-10	TROMEL
Puma	2015-02-10	RAMTUC
Puma	2015-02-10	PHABOU
Puma	2015-02-10	THAMUR
Puma	2015-02-10	THAMUR
Puma	2015-02-10	CAPNIG
Puma	2015-02-10	PYGSTE
Puma	2015-02-10	HYLPOE
Puma	2015-02-10	THACAE
Puma	2015-02-10	THACAE
Puma	2015-02-10	MYRMEN
Puma	2015-02-10	EUPRUF
Puma	2015-02-10	MYRMEN
Puma	2015-02-10	HYLHYP
Puma	2015-02-10	PYGSTE
Puma	2015-02-10	HYLOCH
Puma	2015-02-10	THASCH
Puma	2015-02-10	HABRUB
Puma	2015-02-10	HYLPOE
Puma	2015-02-10	THACAE
Puma	2015-02-10	HENLEU
Puma	2015-02-10	HENLEU
Puma	2015-02-10	GLYSPI
Puma	2015-02-10	MYRCAM
Puma	2015-02-10	PTEPLU
Puma	2015-02-10	PTEPLU
Puma	2015-02-10	PTEPLU
Puma	2015-02-10	GLYSPI
Puma	2015-02-10	MYRFJE
Puma	2015-02-10	TROVIR
Puma	2015-02-10	RAMTUC
Puma	2015-02-10	PSOCRE
Puma	2015-02-10	PSOCRE
Puma	2015-02-13	GYMLEU
Puma	2015-02-13	CYAVIO
Puma	2015-02-13	PLACOR
Puma	2015-02-13	TANSCH
Puma	2015-02-13	MYRBRA
Puma	2015-02-13	HYLHYP
Puma	2015-02-13	CAPNIG
Puma	2015-02-13	RHEMEL
Puma	2015-02-13	CAMMEL
Puma	2015-02-13	RAMTUC
Puma	2015-02-13	AMAFAR
Puma	2015-02-13	CAMMEL
Puma	2015-02-13	QUEPUR
Puma	2015-02-13	QUEPUR
Puma	2015-02-13	MYRBRA
Puma	2015-02-13	XIPGUT
Puma	2015-02-13	RAMTUC
Puma	2015-02-13	THAFUR
Puma	2015-02-13	TROMEL
Puma	2015-02-13	CAPNIG
Puma	2015-02-13	UNKHUM
Puma	2015-02-13	MYRBRA
Puma	2015-02-13	MYRBRA
Puma	2015-02-13	CERSER
Puma	2015-02-13	GLYSPI
Puma	2015-02-13	TURALB
Puma	2015-02-13	PLACOR
Puma	2015-02-13	PLACOR
Puma	2015-02-13	MYIGRA
Puma	2015-02-13	PIPFIL
Puma	2015-02-13	CRYVAR
Puma	2015-02-13	CAMMEL
Puma	2015-02-13	MYITUB
Puma	2015-02-13	PIPFIL
Puma	2015-02-13	PIPFIL
Puma	2015-02-13	PSAVIR
Puma	2015-02-13	PSAVIR
Puma	2015-02-13	CAMMEL
Puma	2015-02-13	THAFUR
Puma	2015-02-13	MIOOLE
Puma	2015-02-13	THACAE
Puma	2015-02-13	THACAE
Puma	2015-02-13	MYIGRA
Puma	2015-02-13	THASCH
Puma	2015-02-13	MYRBRA
Puma	2015-02-13	MYRBRA
Puma	2015-02-13	CERCIN
Puma	2015-02-13	Unkfly
Puma	2015-02-13	Unkfly
Puma	2015-02-13	PIPCOR
Puma	2015-02-13	PSAVIR
Puma	2015-02-13	CHIPAR
Puma	2015-02-13	COLPLU
Puma	2015-02-13	PIPCOR
Puma	2015-02-13	MONMOR
Puma	2015-02-13	MONMOR
Puma	2015-02-13	CAMMEL
Puma	2015-02-13	CELGRA
Puma	2015-02-13	MYRBRA
Puma	2015-02-13	TYRSTO
Puma	2015-02-13	MYRMYO
Puma	2015-02-13	TANCHI
Puma	2015-02-13	TANCHI
Puma	2015-02-13	THASCH
Puma	2015-02-13	MYRMYO
Puma	2015-02-13	THASCH
Puma	2015-02-13	CELFLA
Puma	2015-02-13	CHIPAR
Puma	2015-02-13	CHIPAR
Puma	2015-02-13	LEUSCH
Puma	2015-02-13	CACCEL
Puma	2015-02-13	MYRBRA
Puma	2015-02-13	RAMVIT
Puma	2015-02-13	MYRAXI
Puma	2015-02-13	MYRAXI
Puma	2015-02-13	SELREI
Puma	2015-02-13	QUEPUR
Puma	2015-02-13	QUEPUR
Puma	2015-02-13	PHABOU
Puma	2015-02-13	RAMVIT
Puma	2015-02-13	MYRBRA
Puma	2015-02-13	QUEPUR
Puma	2015-02-13	HYLNAE
Puma	2015-02-13	PIPCOR
Puma	2015-02-13	PIPCOR
Puma	2015-02-13	QUEPUR
Puma	2015-02-13	QUEPUR
Puma	2015-02-13	PHAMAL
Puma	2015-02-13	GEOMON
Puma	2015-02-13	BROCYA
Puma	2015-02-13	TROMEL
Puma	2015-02-13	CACCEL
Puma	2015-02-13	HYLHYP
Puma	2015-02-13	HYLHYP
Puma	2015-02-13	EUPRUF
Puma	2015-02-13	TOLASS
Puma	2015-02-13	MYRBRA
Puma	2015-02-13	CAPNIG
Puma	2015-02-13	AMAFAR
Puma	2015-02-13	AMAFAR
Puma	2015-02-13	CELGRA
Puma	2015-02-13	SCHLEU
Puma	2015-02-13	CELGRA
Puma	2015-02-13	PTEAZA
Puma	2015-02-13	PTEAZA
Puma	2015-02-13	MYRCAM
Puma	2015-02-13	COLPLU
Puma	2015-02-13	RAMVIT
Puma	2015-02-13	CYAVIO
Puma	2015-02-13	BROCYA
Puma	2015-02-13	BROCYA
Puma	2015-02-13	MYITUB
Puma	2015-02-13	TANSPP
Puma	2015-02-13	TANSPP
Puma	2015-02-13	TANSPP
Puma	2015-02-13	CYAVIO
Puma	2015-02-13	PLACOR
Puma	2015-02-13	HYLHYP
Puma	2015-02-13	CAPNIG
Puma	2015-02-13	AMAFAR
Puma	2015-02-13	AMAFAR
Puma	2015-02-13	CELGRA
Puma	2015-02-15	NYCAET
Puma	2015-02-15	PENJAC
Puma	2015-02-15	PENJAC
Puma	2015-02-15	DAPAME
Puma	2015-02-15	DAPAME
Puma	2015-02-15	ATISPA
Puma	2015-02-15	XIPGUT
Puma	2015-02-15	XIPGUT
Puma	2015-02-15	DENRUF
Puma	2015-02-15	THAARD
Puma	2015-02-15	DENRUF
Puma	2015-02-15	TYRSTO
Puma	2015-02-15	SCLCAU
Puma	2015-02-15	HYLPOE
Puma	2015-02-15	HYLSUB
Puma	2015-02-15	GEOMON
Puma	2015-02-15	GRADIG
Puma	2015-02-15	CRYCIN
Puma	2015-02-15	SCLRUF
Puma	2015-02-15	MYRBRA
Puma	2015-02-15	DICCIN
Puma	2015-02-15	RAMTUC
Puma	2015-02-15	RAMTUC
Puma	2015-02-15	PIPERY
Puma	2015-02-15	MITSAL
Puma	2015-02-15	PSAANG
Puma	2015-02-15	RAMVIT
Puma	2015-02-15	THACAE
Puma	2015-02-15	CHIPAR
Puma	2015-02-15	UNKHUM
Puma	2015-02-15	BARMAR
Puma	2015-02-15	HERDUG
Puma	2015-02-15	CHIPAR
Puma	2015-02-15	GYMLEU
Puma	2015-02-15	PIPERY
Puma	2015-02-15	THACAE
Puma	2015-02-15	EUPLAN
Puma	2015-02-15	HERDUG
Puma	2015-02-15	PLACOR
Puma	2015-02-15	MYRLON
Puma	2015-02-15	MYRLON
Puma	2015-02-15	TOLASS
Puma	2015-02-15	GYMLEU
Puma	2015-02-15	COLPLU
Puma	2015-02-15	PHAMAL
Puma	2015-02-15	HYLHYP
Puma	2015-02-15	HYLHYP
Puma	2015-02-15	XIPGUT
Puma	2015-02-15	GLYSPI
Puma	2015-02-15	HYLNAE
Puma	2015-02-15	GLYSPI
Puma	2015-02-15	PIPCOR
Puma	2015-02-15	GLYSPI
Puma	2015-02-15	TERERY
Puma	2015-02-15	EUPLAN
Puma	2015-02-15	MYRBRA
Puma	2015-02-15	GLYSPI
Puma	2015-02-15	XIPSPI
Puma	2015-02-15	MYRBRA
Puma	2015-02-15	CRYCIN
Puma	2015-02-15	BROCYA
Puma	2015-02-15	THRCOR
Puma	2015-02-15	THRCOR
Puma	2015-02-15	THASCH
Puma	2015-02-15	XIPGUT
Puma	2015-02-15	HYPCAN
Puma	2015-02-15	THASCH
Puma	2015-02-15	ARAARA
Puma	2015-02-15	TANSPP
Puma	2015-02-15	TANSPP
Puma	2015-02-15	TANSPP
Puma	2015-02-15	MYRFJE
Puma	2015-02-15	MIOOLE
Puma	2015-02-15	MYRMYO
Puma	2015-02-15	PHIPYR
Puma	2015-02-15	GLYSPI
Puma	2015-02-15	GEOMON
Puma	2015-02-15	XIPGUT
Puma	2015-02-15	THACAE
Puma	2015-02-15	RAMMEL
Puma	2015-02-15	THAFUR
Puma	2015-02-15	Unkwp
Puma	2015-02-15	CAMMEL
Puma	2015-02-15	CAMMEL
Puma	2015-02-15	PENJAC
Puma	2015-02-15	RAMVIT
Puma	2015-02-15	RAMVIT
Puma	2015-02-15	HYPCAN
Puma	2015-02-15	TANNIG
Puma	2015-02-15	TANNIG
Puma	2015-02-15	TANNIG
Puma	2015-02-15	TANNIG
Puma	2015-02-15	TANCHI
Puma	2015-02-15	TANCHI
Puma	2015-02-15	TANCHI
Puma	2015-02-15	DACSPP
Puma	2015-02-15	DACSPP
Puma	2015-02-15	CACCEL
Puma	2015-02-15	RAMVIT
Puma	2015-02-15	RAMVIT
Puma	2015-02-15	PENJAC
Puma	2015-02-15	PENJAC
Puma	2015-02-15	PTEPLU
Puma	2015-02-15	PTEPLU
Puma	2015-02-15	PTEPLU
Puma	2015-02-15	PIOMEL
Puma	2015-02-15	PIOMEL
Puma	2015-02-15	PIOMEL
Puma	2015-02-15	PIOMEL
Puma	2015-02-15	PIOMEL
Puma	2015-02-15	CYAVIO
Puma	2015-02-15	CYAVIO
Puma	2015-02-15	ARAMAC
Puma	2015-02-15	RAMVIT
Puma	2015-02-15	AMAAMA
Puma	2015-02-15	GEOMON
Puma	2015-02-15	TRORUF
Puma	2015-02-15	TANSCH
Puma	2015-02-15	PHAMAL
Puma	2015-02-15	THRCOR
Puma	2015-02-15	THRCOR
Puma	2015-02-15	CACCEL
Puma	2015-02-15	MYRMYO
Puma	2015-02-17	DAPAME
Puma	2015-02-17	DAPAME
Puma	2015-02-17	XIPGUT
Puma	2015-02-17	GLYSPI
Puma	2015-02-17	PSAANG
Puma	2015-02-17	MYRMYO
Puma	2015-02-17	MYRBRA
Puma	2015-02-17	MYRBRA
Puma	2015-02-17	CAMMEL
Puma	2015-02-17	XIPGUT
Puma	2015-02-17	CAMMEL
Puma	2015-02-17	HYLNAE
Puma	2015-02-17	RAMTUC
Puma	2015-02-17	AUTINF
[truncated: 2,106 more rows]

## Sheet: Names
ALPHACODE	Scientific
ABUCUM	Aburria cumanensis (P. pipile)
ACTMAC	Actitis macularia
AGAAGA	Agamia agami
AMAAMA	Amazona amazonica
AMAFAR	Amazona farinosa
AMAOCH	Amazona ochrocephala
AMMAUR	Ammodramus aurifrons
AMUCAS	Amurolimnas castaneiceps
ANCSTR	Ancistrops strigilatus
ANHANH	Anhinga anhinga
ARAARA	Ara ararauna
ARACAJ	Aramides cajanea
ARACHL	Ara chloroptera
ARALEU	Aratinga leucophthalmus
ARAMAC	Ara macao
ARASEV	Ara severa
ARAWED	Aratinga weddellii
ARRAUR	Arremon aurantiirostris
ATICIN	Atilla cinnamomus
ATISPA	Atilla spadiceus
ATTFAS	Atticora fasciata
AUTINF	Automolus infuscatus
AUTMEL	Automolus melanopezus
AUTOCH	Automolus ochrolaemus
AUTRUB	Automolus rubiginosus
AUTRUF	Automolus rufipileatus
BARMAR	Barypthengus martii
BROCYA	Brotogeris cyanoptera
BUCCAP	Bucco capensis
BUCMAC	Bucco macrodactylus
BUTMAG	Buteo magnirostris
BUTURU	Buteogallus urubitinga
CACCEL	Cacicus cela
CAMLAR	Campylopterus largipennis
CAMMEL	Campiphilus melanoleucus
CAMPRO	Campylorhamphus procurvoides
CAMRUB	Campiphilus rubricollis
CAMTRO	Campylorhamphus trochilirostris
CAMTUR	Campylorhynchus turdinus
CAPNIG	Capito niger (auratus)
CATMEL	Cathartes melambrotus
CATMIN	Catharus minimus
CATUST	Catharus ustulatus
CELELE	Celeus elegans
CELFLA	Celeus flavus
CELGRA	Celeus grammicus
CELTOR	Celeus torquatus
CERCIN	Cercomacra cinerescens
CERNIG	Cercomacra nigrescens
CERSER	Cercomacra serva
CERTOR	Ceryle (Megaceryle) torquata
CHANOB	Chamaeza nobilis
CHETEN	Chelidoptera tenebrosa
CHIPAR	Chiroxiphia pareola
CHLAEN	Chloroceryle aenea
CHLAMA	Chloroceryle amazona
CHLAME	Chloroceryle americana
CHLHOL	Chloropipo holochlora
CHLIND	Chloroceryle inda
CHLSPI	Chlorophanes spiza
CHOUNC	Chondrohierax uncinatus
CHROEN	Chrysuronia oenone
CICHUH	Ciccaba (Strix) huhua
CICVIR	Ciccaba (Strix) virgata
CISLEV	Cissopis leveriana
CLYOSE	Clypicterus oseryi
CNISUB	Cnipodectes subbrunneus
COLCOL	Colonia colonus
COLCOL	Colonia colonus
COLPLU	Columba plumbea
COLSUB	Columba subvinacea
CONPER	Conopophaga peruviana
CONVIR	Contopus virens
CORATR	Coragyps atratus
CORTOR	Corythopis torquatus
COTCAY	Cotinga cayana
CRAGUT	Cranioleuca gutturata
CROANI	Crotophaga major
CRYBAR	Crypturellus bartletti
CRYCIN	Crypturellus cinereous
CRYSOU	Crypturellus soui
CRYUND	Crypturellus undulatus
CRYVAR	Crypturellus variegatus
CYACAE	Cyanerpes caeruleus
CYACYA	Cyanocompsa cyanoides
CYAVIO	Cyanocorax violaceus
CYMLIN	Cymbilaimus lineatus
CYPARA	Cyphorhinus arada
DACCAY	Dacnis cayana
DACFLA	Dacnis flaviventer
DACLIN	Dacnis lineata
DACSPP	Dacnis spp
DAPAME	Ibycter (Daptrius) americanus
DAPATE	Daptrius ater
DECLON	Deconychura longicauda
DENCER	Dendrocolaptes certhia
DENFUL	Dendrocincla fuliginosa
DENMER	Dendrocincla merula
DENPIC	Dendrocolaptes picumnus
DENRUF	Dendrexetastes rufigula
DENSTR	Dendroica striata
DICCIN	Dichrozona cincta
DROPHA	Dromococcyx phasianellus
DRYLIN	Dryocopus lineatus
ELAFOR	Elanoides forficatus
ELASTR	Elaenia strepera
ELEPLA	Electron platyrhynchum
EUBRIC	Eubucco richardsoni
EUCPEN	Eucometis penicillata
EUPCRY	Euphonia crysopasta
EUPLAN	Euphonia lanirostris
EUPMIN	Euphonia minuta
EUPRUF	Euphonia rufiventris
EUPXAN	Euphonia xanthogaster
EURHEL	Eurypyga helias
EUTCON	Eutoxeres condamini
FALRUF	Falco rufigularis
FLOMEL	Florisuga mellivora
FORANA	Formicarius analis
FORCOL	Formicarius colma
FORSCL	Forpus sclateri
FREUND	Frederickena unduligera
GALALB	Galbula albirostris
GALCHA	Galbula chalcothorax
GEOMON	Geotrygon montana
GEOSAP	Geotrygon saphirina
GLABRA	Glaucidium brasilianum
GLAHIR	Glaucis hirsuta
GLYSPI	Glyphorynchus spirurus
GRADIG	Grallaria dignissima
GRAGUA	Grallaria guatemalensis
GRIAUR	Griseotyrannus aurantiatrocristatus
GYMFOE	Gymnoderus foetidus
GYMLEU	Gymnopithys leucaspis
GYMLUN	Gymnopithys lunulata
GYMMEX	Gymnomystax mexicanus
HABRUB	Habia rubica
HARBID	Harpagus bidentatus
HELAUR	Heliodoxa aurescens
HELAUR2	Heliothryx aurita
HELSCH	Heliodoxa schreibersii
HEMFLA	Hemithraupis flavicollis
HEMZOS	Hemitriccus zosterops
HENLEU	Henicorhina leucosticta
HERCAC	Herpetotheres cachinnans
HERDUG	Herpsilochmus dugandi
HYLHYP	Hylophilus hypoxanthus
HYLNAE	Hylophylax naevia
HYLOCH	Hylophilus ochraceiceps
HYLPOE	Hylophylax poecilinota
HYLPUN	Hylophylax punctulata
HYLSUB	Hyloctistes subulatus
HYLTHO	Hylophilus thoracicus
HYPCAN	Hypocnemis cantator
HYPHYP	Hypocnemis hypoxantha
ICTPLU	Ictinia plumbea
IODISA	Iodopleura isabellae
JACAUR	Jacamerops aureus
LANFUL	Lanio fulvus
LANHYP	Laniocera hypopyrrha
LATEUL	Lathrotriccus euleri
LATFAS	Laterallus fasciatus
LEGLEU	Legatus leucophaius
LEPALB	Lepidocolaptes albolineatus
LEPCAY	Leptodon cayanensis
LEPRUF	Leptotila rufaxilla
LEUMEL	Leucopternis melanops
LEUSCH	Leucopternis schistacea
LIOTHO	Liosceles thoracicus
LIPVOC	Lipaugus vociferans
LOPCRI	Lophostrix cristata
LOPVIT	Lophotriccus vitiosus
LURSEM	Lurocalis semitorquatus
MACREG	Macheropterus regulus
MALFUS	Malacoptila fusca
MEGMAR	Megastictus margaritatus
MEGPIT	Megarhynchus pitangua
MELCRU	Melanerpes cruentatus
MICBUC	Micrastur buckleyi
MICCIN	Microbates cinereiventris
MICGIL	Micrastur gilvicollis
MICLAN	Micromonacha lanceolata
MICMAR	Microcerculus marginatus
MICMIR	Micrastur mirandollei
MICQUI	Microrhopias quixensis
MICRUF	Micrastur ruficollis
MICSEM	Micrastur semitorquatus
MIOOLE	Mionectes oleagineus
MITSAL	Mitu salvini
MOMMOM	Momotus momota
MONFLA	Monasa flavirostris
MONMOR	Monasa morphoeus
MONNIG	Monasa nigrofrons
MYIBAR	Myiobius barbatus
MYICAN	Myiopagis caniceps
MYIECA	Myiornis ecaudatus
MYIFLA	Myiopagis flavivertex
MYIGAI	Myiopagis gaimardii
MYIGRA	Myiozetes granadensis
MYILUT	Myiozetetes luteiventris
MYIMAC	Myiodynastes maculatus
MYISIM	Myiozetetes similis
MYISWA	Myiarchus swainsoni
MYITUB	Myiarchus tuberculifer
MYRAXI	Myrmotherula axillaris
MYRBRA	Myrmotherula brachyura
MYRCAM	Myrmothera campanisona
MYRERY	Myromtherula erythrura
MYRFJE	Myrmotherula fjeldsai
MYRFOR	Myrmeciza fortis
MYRHAE	Myrmotherula haematonota
MYRHAU	Myrmotherula hauxwelli
MYRHYP	Myrmeciza hyperythra
MYRLON	Myrmotherula longipennis
MYRMEL	Myrmeciza melanoceps
MYRMEN	Myrmotherula menetriesii
MYRMUL	Myrmotherula multostriata
MYRMYO	Myrmoborus myotherinus
MYROBS	Myrmotherula obscura
MYRORN	Myrmotherula ornata
NASLON	Nasica longirostris
NEOGEO	Neomorphnus geoffroyi
NEONIG	Neoctantes niger
NONBRU	Nonnula brunnea
NOTMAC	Notharchus macrorhynchus
NOTURU	Nothocrax urumutum
NYCAET	Nyctibius aethereus
NYCGRA	Nyctibius grandis
NYCGRI	Nyctibius griseus
NYCOCE	Nyctiphrynus ocellatus
OCHLIT	Ochthoeca litoralis
ODOGUJ	Odontophorus gujanensis
OPIHOA	Opisthocomus hoazin
ORNINE	Ornithion inerme
ORTMAN	Orthopsittaca manilata
OTUCHO	Otus choliba
OTUWAT	Otus watsoni
PACCAS	Pachyramphus castaneus
PACMAR	Pachyramphus marginatus
PACPOL	Pachyramphus polychopterus
PANHAL	Pandion haliaetus
PARGUL	Paroaria gularis
PARHUM	Parkerthraustes humeralis
PENJAC	Penelope jacquacu
PHAATR	Phaethornis atrimentalis
PHABOU	Phaethornis bourcieri
PHAFUL	Phaeothlypis fulvicauda
PHAMAL	Phaethornis (superciliosus) malaris
PHAPAV	Pharomachrus pavoninus
PHARUB	Phaethornis ruber
PHIERT	Philydor erythropterus
PHIERY	Philydor erythrocercus
PHIPYR	Philydor pyrrhodes
PHIRUF	Philydor ruficaudatus
PHLERY	Phlegopsis erythroptera
PHONIG	Phoenicircus nigricollis
PIACAY	Piaya cayana
PIAMEL	Piaya melanogaster
PICCHR	Piculus chrysochloros
PICFLA	Piculus flavigula
PICLAF	Picumnus lafresnayi
PICRUF	Picumnus rufiventris
PILPIL	Pilherodias pileatus
PIOBAR	Pionopsitta barrabandi
PIOMEL	Pionites melanocephala
PIOMEN	Pionus menstruus
PIPCHL	Piprites chloris
PIPCOR	Pipra coronata
PIPERY	Pipra erythrocephala
PIPFIL	Pipra filicauda
PIPPIP	Pipra pipra
PIROLI	Piranga olivacea
PIRRUB	Piranga rubra
PITALB	Pithys albifrons
PITGRO	Saltator (Pitylus) grossus
PITLIC	Philohydor (Pitangus) lictor
PITSUL	Pitangus sulphuratus
PLACOR	Platyrinchus coronatus
PLAMIN	Platypsaris minor
POECAP	Poecilotriccus capitale
POLPLU	Polioptila plumbea
POPLAN	Popelairia langsdorffi
PROCHA	Progne chalybea
PSAANG	Psaracolius angustifrons
PSADEC	Psarocolius decumanus
PSAVIR	Psaracolius viridis
PSAYUR	Psarocolius yuracares
PSOCRE	Psophia crepitans
PTEAZA	Pteroglossus azara
PTEINS	Pteroglossus inscriptus
PTEPLU	Pteroglossus pluricinctus
PULPER	Pulsatrix perspicillata
PYGSTE	Pygiptila stellaris
PYRMEL	Pyrrhura melanura
QUEPUR	Querula purpurata
RAMCAR	Ramphocelus carbo
RAMMEL	Ramphocaenus melanurus
RAMNIG	Ramphocelus nigrogularis
RAMRUF	Ramphotrigon ruficauda
RAMTUC	Ramphastos tucanus
RAMVIT	Ramphastos vitellinus
REISQU	Reinarda (Tachornis) squamata
RHEMEL	Rhegmatorhina melanosticta
RHYSIM	Rhytipterna simplex
SALMAX	Saltator maximus
SARPAP	Sarcoramphus papa
SCHLEU	Schistocichla leucostigma
SCHTUR	Schiffornis turdinus
SCLCAU	Sclerurus caudacutus
SCLMEX	Sclerurus mexicanus
SCLNAE	Sclateria naevia
SCLRUF	Sclerurus rufigularis
SELREI	Selenidera reinwardtii
SIRSIB	Sirystes sibilator
SPIORN	Spizaetus ornatus
SPITYR	Spizaetus tyrannus
STRZON	Streptoprocne zonaris
SYNRUT	Synallaxis rutilans
TACALB	Tachycincta albiventer
TACCRI	Tachyphonus cristatus
TACSUR	Tachyphonus surinamus
TANCAL	Tangara callophyrs
TANCHI	Tangara chilensis
TANGYR	Tangara gyrola
TANMEX	Tangara mexicana
TANNIG	Tangara nigrocincta
TANSCH	Tangara schrankii
TANSPP	Tangara spp.
TANVEL	Tangara velia
TANXAN	Tangara xanthogastra
TERERY	Terenotriccus erythrurus
TERHUM	Terenura humeralis
TERVIR	Tersina viridis
THAAET	Thamnophilus aethiops
THAARD	Thamnomanes ardesiascus
THACAE	Thamnomanes caesius
THAFUR	Thalurania furcata
THAMUR	Thamnophilus murinus
THASCH	Thamnophilus schistaceus
THRCOR	Thryothorus coraya
THREPI	Thraupis episcopus
THRNIG	Threnetes niger
THRPAL	Thraupis palmarum
TIGLIN	Tigrisoma lineatum
TINGUT	Tinamus guttatus
TINMAJ	Tinamus major
TITCAY	Tityra cayana
TITINQ	Tityra inquisitor
TITSEM	Tityra semifasciatum
TOLASS	Tolmomyias assimilis
TOLPOL	Tolmomyias poliocephalus
TOLVIR	Tolmomyias viridiceps
TOPPYR	Topaza pyra
TROAED	Troglodytes aedon
TROCOL	Trogon collaris
TROCUR	Trogon curucui
TROMEL	Trogon melanurus
TRORUF	Trogon rufus
TROVIO	Trogon violaceus
TROVIR	Trogon viridis
TURALB	Turdus albicollis
TURHAU	Turdus hauxwelli
TURLAW	Turdus lawrencii
TYRELA	Tyrannulus elatus
TYRMEL	Tyrannus melancholicus
TYRSAV	Tyrannus savanna
TYRSTO	Tyranneutes stolzmani
UNKHUM	Unknown hummer
VENAFF	Veniliornis affinis
VIRFLA	Vireo flavoviridis
VIRLEU	Vireolanius leucotis
VIROLI	Vireo olivaceus
XENMIN	Xenops minutus
XENTEN	Xenops tenuirostris
XIPGUT	Xiphorynchus guttatus
XIPOBS	Xiphorhynchus obsoletus
XIPOCE	Xiphorynchus ocellatus
XIPPIC	Xiphorhynchus picus
XIPPRO	Xiphocolaptes promeropirhynchus
XIPSPI	Xiphorynchus spixii
ZIMCHR	Zimmerius chrysops
ZIMGRA	Zimmerius gracilipes
